# Supplementary material for: The Promises and Pitfalls of Machine Learning for Detecting Viruses in Aquatic Metagenomes
Source: Front Microbiol. 2019 Apr 16;10:806. doi: 10.3389/fmicb.2019.00806 (PMC6477088; doi:10.3389/fmicb.2019.00806)
Supplement: FILE S2 — List of metagenomes and genomes used in training and evaluation sets. [file Table_2.XLSX]

## Sheet: Training set - Tara
Data available at	https://www.ebi.ac.uk/ena/about/tara-oceans-assemblies
Non viral datasets
WGS master	WGS sequence range	Assembly name	Sample
CENW01000000	CENW01000001-CENW01292405	TARA_032_SRF_0.22-1.6	SAMEA2619818
CENX01000000	CENX01000001-CENX01420117	TARA_018_DCM_0.22-1.6	SAMEA2619678
CENY01000000	CENY01000001-CENY01354590	TARA_032_DCM_0.22-1.6	SAMEA2619840
CEOF01000000	CEOF01000001-CEOF01441099	TARA_018_SRF_0.22-1.6	SAMEA2619667
CEOX01000000	CEOX01000001-CEOX01232561	TARA_065_DCM_0.22-3	SAMEA2620890
CEPK01000000	CEPK01000001-CEPK01333437	TARA_042_DCM_0.22-1.6	SAMEA2620259
CEQD01000000	CEQD01000001-CEQD01254689	TARA_042_SRF_0.22-1.6	SAMEA2620230
CEQJ01000000	CEQJ01000001-CEQJ01116750	TARA_076_SRF_0.22-3	SAMEA2621198
CEQU01000000	CEQU01000001-CEQU01255481	TARA_076_DCM_0.22-3	SAMEA2621216
CERK01000000	CERK01000001-CERK01136056	TARA_066_DCM_0.22-3	SAMEA2620950
CERW01000000	CERW01000001-CERW01266433	TARA_066_SRF_0.22-3	SAMEA2620929
CETE01000000	CETE01000001-CETE01271804	TARA_109_DCM_0.22-3	SAMEA2622336
CEVY01000000	CEVY01000001-CEVY01193172	TARA_065_SRF_0.22-3	SAMEA2620855
CEWH01000000	CEWH01000001-CEWH01277314	TARA_109_SRF_0.22-3	SAMEA2622316
Viral datasets
WGS master	WGS sequence range	Assembly name	Sample
CENK01000000	CENK01000001-CENK01056835	TARA_018_DCM_0.22	SAMEA2619686
CEOA01000000	CEOA01000001-CEOA01108815	TARA_032_SRF_0.22	SAMEA2619838
CEQC01000000	CEQC01000001-CEQC01093248	TARA_076_SRF_0.22	SAMEA2621213
CERN01000000	CERN01000001-CERN01073916	TARA_066_SRF_0.22	SAMEA2620947
CESX01000000	CESX01000001-CESX01117768	TARA_109_DCM_0.22	SAMEA2622357
CENM01000000	CENM01000001-CENM01039796	TARA_032_DCM_0.22	SAMEA2619854
CEPE01000000	CEPE01000001-CEPE01124695	TARA_042_DCM_0.22	SAMEA2620273
CEQK01000000	CEQK01000001-CEQK01120678	TARA_076_DCM_0.22	SAMEA2621229
CERU01000000	CERU01000001-CERU01112275	TARA_065_DCM_0.22	SAMEA2620925
CETF01000000	CETF01000001-CETF01110025	TARA_109_SRF_0.22	SAMEA2622331
CENR01000000	CENR01000001-CENR01073799	TARA_018_SRF_0.22	SAMEA2619677
CEPP01000000	CEPP01000001-CEPP01078877	TARA_042_SRF_0.22	SAMEA2620256
CERJ01000000	CERJ01000001-CERJ01077325	TARA_066_DCM_0.22	SAMEA2620967
CERY01000000	CERY01000001-CERY01112527	TARA_065_SRF_0.22	SAMEA2620879
CENL01000000	CENL01000001-CENL01122016	TARA_025_DCM_0.22	SAMEA2619791
CEOI01000000	CEOI01000001-CEOI01062949	TARA_036_DCM_0.22	SAMEA2619962
CEPN01000000	CEPN01000001-CEPN01080476	TARA_038_DCM_0.22	SAMEA2620027
CERA01000000	CERA01000001-CERA01065904	TARA_068_DCM_0.22	SAMEA2621061
CEOD01000000	CEOD01000001-CEOD01047870	TARA_036_SRF_0.22	SAMEA2619950
CEOL01000000	CEOL01000001-CEOL01095472	TARA_038_SRF_0.22	SAMEA2620014
CEQA01000000	CEQA01000001-CEQA01141590	TARA_041_DCM_0.22	SAMEA2620227
CERF01000000	CERF01000001-CERF01081276	TARA_072_SRF_0.22	SAMEA2621151
CEOE01000000	CEOE01000001-CEOE01106865	TARA_025_SRF_0.22	SAMEA2619779
CEPI01000000	CEPI01000001-CEPI01076620	TARA_041_SRF_0.22	SAMEA2620210
CEQV01000000	CEQV01000001-CEQV01084117	TARA_072_DCM_0.22	SAMEA2621173
CERO01000000	CERO01000001-CERO01089440	TARA_068_SRF_0.22	SAMEA2621033
CENH01000000	CENH01000001-CENH01058037	TARA_030_DCM_0.22	SAMEA2591132
CEOG01000000	CEOG01000001-CEOG01108607	TARA_034_SRF_0.22	SAMEA2619903
CERO01000000	CERO01000001-CERO01089440	TARA_068_SRF_0.22	SAMEA2621033
CXWF01000000	CXWF01000001-CXWF01096029	TARA_064_SRF_0.22	SAMEA2620812
CEOH01000000	CEOH01000001-CEOH01089292	TARA_034_DCM_0.22	SAMEA2619923
CEOT01000000	CEOT01000001-CEOT01082045	TARA_064_DCM_0.22	SAMEA2620852

## Sheet: evaluation set - JGI VR
coral metagenomes	NCBI biosample ID
	SAMN06265923
	SAMN06266027
	SAMN06266028
	SAMN06266029
Hot spring	NCBI biosample ID
	SAMN03436243
	SAMN05518453
	SAMN06264664
	SAMN06264996
	SAMN06265911
	SAMN06266162
	SAMN06267034
	SAMN06268369_2
	SAMN06268369
	SAMN06268698
	SAMN06268701
	SAMN06343854
	SAMN06343855
	SAMN06343857_2
	SAMN06343857
	SAMN06343858
	SAMN06343859
	SAMN07631051
marine	NCBI biosample ID
	SAMN03168875
	SAMN03169777
	SAMN05224433
	SAMN05224440
	SAMN05224461
	SAMN05224476
	SAMN05421615
	SAMN05518363
	SAMN05518585
	SAMN05518724
	SAMN06264763
	SAMN06264994
	SAMN06266116
	SAMN06266117
	SAMN06266127
	SAMN06266145
	SAMN06266344
	SAMN06267279
	SAMN06267864
	SAMN06267872
	SAMN06267873
	SAMN06267887
	SAMN06269076
	SAMN06343719
	SAMN06343720
	SAMN06343824
	SAMN06343905
	SAMN06343909
	SAMN06344129
	SAMN06344143
	SAMN06344165
	SAMN07631171
	SAMN07632882
Wastewater	NCBI biosample ID
	SAMN06267484
	SAMN06267485
	SAMN06267486
	SAMN06267487
	SAMN06267488
	SAMN06267489
	SAMN06267490
	SAMN06267562
	SAMN06267565
	SAMN06267566
	SAMN06267568
	SAMN06267571
	SAMN06267573
	SAMN06267629
	SAMN06267630
	SAMN06267632
	SAMN06267633
	SAMN06344000
	SAMN06344002
	SAMN06344003
	SAMN06344004
	SAMN06458254
	SAMN06458255
	SAMN06458256
	SAMN06458257
	SAMN06458258
	SAMN06458259
	SAMN07138583
	SAMN07138585

## Sheet: evaluation set - "all genomes"
Viral genomes FTP adress								Bacterial genomes FTP adress								Archeal genomes FTP adress
ftp://ftp.ncbi.nlm.nih.gov/genomes/all/GCA/000/914/475/GCA_000914475.1_ViralProj239724								ftp://ftp.ncbi.nlm.nih.gov/genomes/all/GCF/000/521/525/GCF_000521525.1_ASM52152v1								ftp://ftp.ncbi.nlm.nih.gov/genomes/all/GCF/000/762/265/GCF_000762265.1_ASM76226v1
ftp://ftp.ncbi.nlm.nih.gov/genomes/all/GCA/000/917/075/GCA_000917075.1_ViralProj239735								ftp://ftp.ncbi.nlm.nih.gov/genomes/all/GCF/000/521/545/GCF_000521545.1_ASM52154v1								ftp://ftp.ncbi.nlm.nih.gov/genomes/all/GCF/000/953/115/GCF_000953115.1_DSM1535
ftp://ftp.ncbi.nlm.nih.gov/genomes/all/GCA/000/914/675/GCA_000914675.1_ViralProj240025								ftp://ftp.ncbi.nlm.nih.gov/genomes/all/GCF/000/521/565/GCF_000521565.1_ASM52156v1								ftp://ftp.ncbi.nlm.nih.gov/genomes/all/GCF/001/458/655/GCF_001458655.1_Mb9
ftp://ftp.ncbi.nlm.nih.gov/genomes/all/GCA/000/914/695/GCA_000914695.1_ViralProj240029								ftp://ftp.ncbi.nlm.nih.gov/genomes/all/GCF/000/521/585/GCF_000521585.1_ASM52158v1								ftp://ftp.ncbi.nlm.nih.gov/genomes/all/GCF/002/813/085/GCF_002813085.1_ASM281308v1
ftp://ftp.ncbi.nlm.nih.gov/genomes/all/GCA/000/914/755/GCA_000914755.1_ViralProj240041								ftp://ftp.ncbi.nlm.nih.gov/genomes/all/GCF/001/280/225/GCF_001280225.1_ASM128022v1								ftp://ftp.ncbi.nlm.nih.gov/genomes/all/GCF/001/889/405/GCF_001889405.1_ASM188940v1
ftp://ftp.ncbi.nlm.nih.gov/genomes/all/GCA/000/915/695/GCA_000915695.1_ViralProj240023								ftp://ftp.ncbi.nlm.nih.gov/genomes/all/GCF/001/648/115/GCF_001648115.1_ASM164811v1								ftp://ftp.ncbi.nlm.nih.gov/genomes/all/GCF/000/969/985/GCF_000969985.1_ASM96998v1
ftp://ftp.ncbi.nlm.nih.gov/genomes/all/GCA/000/916/375/GCA_000916375.1_ViralProj240026								ftp://ftp.ncbi.nlm.nih.gov/genomes/all/GCF/001/700/895/GCF_001700895.1_ASM170089v1								ftp://ftp.ncbi.nlm.nih.gov/genomes/all/GCF/000/970/025/GCF_000970025.1_ASM97002v1
ftp://ftp.ncbi.nlm.nih.gov/genomes/all/GCA/000/916/475/GCA_000916475.1_ViralProj240046								ftp://ftp.ncbi.nlm.nih.gov/genomes/all/GCF/900/016/785/GCF_900016785.1_BTsPazieg1.0								ftp://ftp.ncbi.nlm.nih.gov/genomes/all/GCF/000/970/065/GCF_000970065.1_ASM97006v1
ftp://ftp.ncbi.nlm.nih.gov/genomes/all/GCA/000/917/195/GCA_000917195.1_ViralProj240020								ftp://ftp.ncbi.nlm.nih.gov/genomes/all/GCF/900/128/595/GCF_900128595.1_BCipseudotaxifoliae_v1.0								ftp://ftp.ncbi.nlm.nih.gov/genomes/all/GCF/000/970/305/GCF_000970305.1_ASM97030v1
ftp://ftp.ncbi.nlm.nih.gov/genomes/all/GCA/000/917/235/GCA_000917235.1_ViralProj240028								ftp://ftp.ncbi.nlm.nih.gov/genomes/all/GCF/900/128/725/GCF_900128725.1_BCifornacula_v1.0								ftp://ftp.ncbi.nlm.nih.gov/genomes/all/GCF/001/027/005/GCF_001027005.1_ASM102700v1
ftp://ftp.ncbi.nlm.nih.gov/genomes/all/GCA/000/917/275/GCA_000917275.1_ViralProj240036								ftp://ftp.ncbi.nlm.nih.gov/genomes/all/GCF/900/128/735/GCF_900128735.1_BCiconfinis_v1.0								ftp://ftp.ncbi.nlm.nih.gov/genomes/all/GCF/000/970/165/GCF_000970165.1_ASM97016v1
ftp://ftp.ncbi.nlm.nih.gov/genomes/all/GCA/002/630/905/GCA_002630905.1_ASM263090v1								ftp://ftp.ncbi.nlm.nih.gov/genomes/all/GCF/000/988/565/GCF_000988565.1_ASM98856v1								ftp://ftp.ncbi.nlm.nih.gov/genomes/all/GCF/000/970/185/GCF_000970185.1_ASM97018v1
ftp://ftp.ncbi.nlm.nih.gov/genomes/all/GCA/002/755/915/GCA_002755915.1_ASM275591v1								ftp://ftp.ncbi.nlm.nih.gov/genomes/all/GCF/002/305/895/GCF_002305895.1_ASM230589v1								ftp://ftp.ncbi.nlm.nih.gov/genomes/all/GCF/000/970/205/GCF_000970205.1_ASM97020v1
ftp://ftp.ncbi.nlm.nih.gov/genomes/all/GCA/000/914/855/GCA_000914855.1_ViralProj240237								ftp://ftp.ncbi.nlm.nih.gov/genomes/all/GCF/002/305/875/GCF_002305875.1_ASM230587v1								ftp://ftp.ncbi.nlm.nih.gov/genomes/all/GCF/000/970/225/GCF_000970225.1_ASM97022v1
ftp://ftp.ncbi.nlm.nih.gov/genomes/all/GCA/000/917/015/GCA_000917015.1_ViralProj239723								ftp://ftp.ncbi.nlm.nih.gov/genomes/all/GCF/001/027/285/GCF_001027285.1_ASM102728v1								ftp://ftp.ncbi.nlm.nih.gov/genomes/all/GCF/000/970/245/GCF_000970245.1_ASM97024v1
ftp://ftp.ncbi.nlm.nih.gov/genomes/all/GCA/000/918/435/GCA_000918435.1_ViralProj240235								ftp://ftp.ncbi.nlm.nih.gov/genomes/all/GCF/001/189/295/GCF_001189295.1_ASM118929v1								ftp://ftp.ncbi.nlm.nih.gov/genomes/all/GCF/000/969/885/GCF_000969885.1_ASM96988v1
ftp://ftp.ncbi.nlm.nih.gov/genomes/all/GCA/000/915/495/GCA_000915495.1_ViralProj239722								ftp://ftp.ncbi.nlm.nih.gov/genomes/all/GCF/002/222/655/GCF_002222655.1_ASM222265v1								ftp://ftp.ncbi.nlm.nih.gov/genomes/all/GCF/000/969/905/GCF_000969905.1_ASM96990v1
ftp://ftp.ncbi.nlm.nih.gov/genomes/all/GCA/000/916/835/GCA_000916835.1_ViralProj237323								ftp://ftp.ncbi.nlm.nih.gov/genomes/all/GCF/002/355/975/GCF_002355975.1_ASM235597v1								ftp://ftp.ncbi.nlm.nih.gov/genomes/all/GCF/000/970/325/GCF_000970325.1_ASM97032v1
ftp://ftp.ncbi.nlm.nih.gov/genomes/all/GCA/002/630/005/GCA_002630005.1_ASM263000v1								ftp://ftp.ncbi.nlm.nih.gov/genomes/all/GCF/002/151/465/GCF_002151465.1_ASM215146v1								ftp://ftp.ncbi.nlm.nih.gov/genomes/all/GCF/000/734/035/GCF_000734035.1_ASM73403v1
ftp://ftp.ncbi.nlm.nih.gov/genomes/all/GCA/000/915/535/GCA_000915535.1_ViralProj239730								ftp://ftp.ncbi.nlm.nih.gov/genomes/all/GCF/002/151/485/GCF_002151485.1_ASM215148v1								ftp://ftp.ncbi.nlm.nih.gov/genomes/all/GCF/000/306/765/GCF_000306765.2_ASM30676v2
ftp://ftp.ncbi.nlm.nih.gov/genomes/all/GCA/000/917/035/GCA_000917035.1_ViralProj239727								ftp://ftp.ncbi.nlm.nih.gov/genomes/all/GCF/002/151/505/GCF_002151505.1_ASM215150v1								ftp://ftp.ncbi.nlm.nih.gov/genomes/all/GCF/002/214/365/GCF_002214365.1_ASM221436v1
ftp://ftp.ncbi.nlm.nih.gov/genomes/all/GCA/001/343/745/GCA_001343745.1_ViralMultiSegProj237137								ftp://ftp.ncbi.nlm.nih.gov/genomes/all/GCF/002/442/595/GCF_002442595.1_ASM244259v1								ftp://ftp.ncbi.nlm.nih.gov/genomes/all/GCF/002/215/405/GCF_002215405.1_ASM221540v1
ftp://ftp.ncbi.nlm.nih.gov/genomes/all/GCA/000/915/475/GCA_000915475.1_ViralProj239432								ftp://ftp.ncbi.nlm.nih.gov/genomes/all/GCF/000/956/315/GCF_000956315.1_ASM95631v1								ftp://ftp.ncbi.nlm.nih.gov/genomes/all/GCF/002/215/445/GCF_002215445.1_ASM221544v1
ftp://ftp.ncbi.nlm.nih.gov/genomes/all/GCA/000/916/975/GCA_000916975.1_ViralProj239271								ftp://ftp.ncbi.nlm.nih.gov/genomes/all/GCF/001/660/005/GCF_001660005.1_ASM166000v1								ftp://ftp.ncbi.nlm.nih.gov/genomes/all/GCF/002/215/485/GCF_002215485.1_ASM221548v1
ftp://ftp.ncbi.nlm.nih.gov/genomes/all/GCA/002/829/425/GCA_002829425.1_ASM282942v1								ftp://ftp.ncbi.nlm.nih.gov/genomes/all/GCF/000/512/145/GCF_000512145.1_ASM51214v2								ftp://ftp.ncbi.nlm.nih.gov/genomes/all/GCF/002/215/525/GCF_002215525.1_ASM221552v1
ftp://ftp.ncbi.nlm.nih.gov/genomes/all/GCA/002/829/445/GCA_002829445.1_ASM282944v1								ftp://ftp.ncbi.nlm.nih.gov/genomes/all/GCF/000/012/085/GCF_000012085.2_ASM1208v2								ftp://ftp.ncbi.nlm.nih.gov/genomes/all/GCF/002/215/565/GCF_002215565.1_ASM221556v1
ftp://ftp.ncbi.nlm.nih.gov/genomes/all/GCA/000/916/155/GCA_000916155.1_ViralProj239697								ftp://ftp.ncbi.nlm.nih.gov/genomes/all/GCF/001/936/255/GCF_001936255.1_ASM193625v1								ftp://ftp.ncbi.nlm.nih.gov/genomes/all/GCF/000/968/355/GCF_000968355.1_ASM96835v1
ftp://ftp.ncbi.nlm.nih.gov/genomes/all/GCA/000/916/855/GCA_000916855.1_ViralProj237470								ftp://ftp.ncbi.nlm.nih.gov/genomes/all/GCF/001/676/785/GCF_001676785.2_ASM167678v2								ftp://ftp.ncbi.nlm.nih.gov/genomes/all/GCF/000/968/395/GCF_000968395.1_ASM96839v1
ftp://ftp.ncbi.nlm.nih.gov/genomes/all/GCA/000/914/375/GCA_000914375.1_ViralProj237559								ftp://ftp.ncbi.nlm.nih.gov/genomes/all/GCF/002/850/235/GCF_002850235.1_ASM285023v1								ftp://ftp.ncbi.nlm.nih.gov/genomes/all/GCF/000/968/435/GCF_000968435.1_ASM96843v1
ftp://ftp.ncbi.nlm.nih.gov/genomes/all/GCA/000/916/955/GCA_000916955.1_ViralProj239026								ftp://ftp.ncbi.nlm.nih.gov/genomes/all/GCF/000/604/125/GCF_000604125.1_ASM60412v1								ftp://ftp.ncbi.nlm.nih.gov/genomes/all/GCF/900/079/115/GCF_900079115.1_SSOP1
ftp://ftp.ncbi.nlm.nih.gov/genomes/all/GCA/000/914/455/GCA_000914455.1_ViralProj239434								ftp://ftp.ncbi.nlm.nih.gov/genomes/all/GCF/000/941/035/GCF_000941035.1_ASM94103v1								ftp://ftp.ncbi.nlm.nih.gov/genomes/all/GCF/002/355/655/GCF_002355655.1_ASM235565v1
ftp://ftp.ncbi.nlm.nih.gov/genomes/all/GCA/000/916/135/GCA_000916135.1_ViralProj239431								ftp://ftp.ncbi.nlm.nih.gov/genomes/all/GCF/001/010/765/GCF_001010765.1_ASM101076v1								ftp://ftp.ncbi.nlm.nih.gov/genomes/all/GCF/001/190/965/GCF_001190965.1_ASM119096v1
ftp://ftp.ncbi.nlm.nih.gov/genomes/all/GCA/000/920/535/GCA_000920535.1_ViralProj243496								ftp://ftp.ncbi.nlm.nih.gov/genomes/all/GCF/001/047/635/GCF_001047635.1_ASM104763v1								ftp://ftp.ncbi.nlm.nih.gov/genomes/all/GCF/000/970/085/GCF_000970085.1_ASM97008v1
ftp://ftp.ncbi.nlm.nih.gov/genomes/all/GCA/000/914/635/GCA_000914635.1_ViralProj240017								ftp://ftp.ncbi.nlm.nih.gov/genomes/all/GCF/001/047/655/GCF_001047655.1_ASM104765v1								ftp://ftp.ncbi.nlm.nih.gov/genomes/all/GCF/000/970/145/GCF_000970145.1_ASM97014v1
ftp://ftp.ncbi.nlm.nih.gov/genomes/all/GCA/000/915/715/GCA_000915715.1_ViralProj240027								ftp://ftp.ncbi.nlm.nih.gov/genomes/all/GCF/001/293/065/GCF_001293065.1_ASM129306v1								ftp://ftp.ncbi.nlm.nih.gov/genomes/all/GCF/001/266/655/GCF_001266655.1_ASM126665v1
ftp://ftp.ncbi.nlm.nih.gov/genomes/all/GCA/000/915/735/GCA_000915735.1_ViralProj240031								ftp://ftp.ncbi.nlm.nih.gov/genomes/all/GCF/002/073/495/GCF_002073495.1_ASM207349v1								ftp://ftp.ncbi.nlm.nih.gov/genomes/all/GCF/001/266/675/GCF_001266675.1_ASM126667v1
ftp://ftp.ncbi.nlm.nih.gov/genomes/all/GCA/000/915/795/GCA_000915795.1_ViralProj240043								ftp://ftp.ncbi.nlm.nih.gov/genomes/all/GCF/001/444/465/GCF_001444465.1_ASM144446v1								ftp://ftp.ncbi.nlm.nih.gov/genomes/all/GCF/001/266/695/GCF_001266695.1_ASM126669v1
ftp://ftp.ncbi.nlm.nih.gov/genomes/all/GCA/000/917/255/GCA_000917255.1_ViralProj240032								ftp://ftp.ncbi.nlm.nih.gov/genomes/all/GCF/000/632/475/GCF_000632475.1_ASM63247v2								ftp://ftp.ncbi.nlm.nih.gov/genomes/all/GCF/001/266/715/GCF_001266715.1_ASM126671v1
ftp://ftp.ncbi.nlm.nih.gov/genomes/all/GCA/000/917/295/GCA_000917295.1_ViralProj240040								ftp://ftp.ncbi.nlm.nih.gov/genomes/all/GCF/001/315/015/GCF_001315015.1_ASM131501v1								ftp://ftp.ncbi.nlm.nih.gov/genomes/all/GCF/001/266/735/GCF_001266735.1_ASM126673v1
ftp://ftp.ncbi.nlm.nih.gov/genomes/all/GCA/000/916/315/GCA_000916315.1_ViralProj240014								ftp://ftp.ncbi.nlm.nih.gov/genomes/all/GCF/000/583/755/GCF_000583755.1_ASM58375v1								ftp://ftp.ncbi.nlm.nih.gov/genomes/all/GCF/002/214/585/GCF_002214585.1_ASM221458v1
ftp://ftp.ncbi.nlm.nih.gov/genomes/all/GCA/001/611/625/GCA_001611625.1_ViralMultiSegProj317364								ftp://ftp.ncbi.nlm.nih.gov/genomes/all/GCF/000/583/795/GCF_000583795.1_ASM58379v1								ftp://ftp.ncbi.nlm.nih.gov/genomes/all/GCF/000/504/565/GCF_000504565.1_ASM50456v2
ftp://ftp.ncbi.nlm.nih.gov/genomes/all/GCA/002/676/835/GCA_002676835.1_ASM267683v1								ftp://ftp.ncbi.nlm.nih.gov/genomes/all/GCF/000/954/195/GCF_000954195.1_ASM95419v1								ftp://ftp.ncbi.nlm.nih.gov/genomes/all/GCF/001/592/435/GCF_001592435.1_ASM159243v1
ftp://ftp.ncbi.nlm.nih.gov/genomes/all/GCA/000/917/175/GCA_000917175.1_ViralProj240016								ftp://ftp.ncbi.nlm.nih.gov/genomes/all/GCF/001/417/635/GCF_001417635.1_ASM141763v1								ftp://ftp.ncbi.nlm.nih.gov/genomes/all/GCF/002/214/465/GCF_002214465.1_ASM221446v1
ftp://ftp.ncbi.nlm.nih.gov/genomes/all/GCA/000/917/215/GCA_000917215.2_ViralProj240024								ftp://ftp.ncbi.nlm.nih.gov/genomes/all/GCF/001/483/845/GCF_001483845.1_ASM148384v1								ftp://ftp.ncbi.nlm.nih.gov/genomes/all/GCF/001/481/685/GCF_001481685.1_ASM148168v1
ftp://ftp.ncbi.nlm.nih.gov/genomes/all/GCA/000/915/555/GCA_000915555.1_ViralProj239734								ftp://ftp.ncbi.nlm.nih.gov/genomes/all/GCF/001/639/125/GCF_001639125.1_ASM163912v1								ftp://ftp.ncbi.nlm.nih.gov/genomes/all/GCF/002/214/605/GCF_002214605.1_ASM221460v1
ftp://ftp.ncbi.nlm.nih.gov/genomes/all/GCA/000/914/715/GCA_000914715.1_ViralProj240033								ftp://ftp.ncbi.nlm.nih.gov/genomes/all/GCF/001/717/605/GCF_001717605.1_ASM171760v1								ftp://ftp.ncbi.nlm.nih.gov/genomes/all/GCF/900/012/635/GCF_900012635.1_Pyrococcus_chitonophagus_genome_sequence
ftp://ftp.ncbi.nlm.nih.gov/genomes/all/GCA/000/915/435/GCA_000915435.1_ViralMultiSegProj238956								ftp://ftp.ncbi.nlm.nih.gov/genomes/all/GCF/001/865/455/GCF_001865455.1_ASM186545v1								ftp://ftp.ncbi.nlm.nih.gov/genomes/all/GCF/001/433/455/GCF_001433455.1_ASM143345v1
ftp://ftp.ncbi.nlm.nih.gov/genomes/all/GCA/002/829/505/GCA_002829505.1_ASM282950v1								ftp://ftp.ncbi.nlm.nih.gov/genomes/all/GCF/001/865/475/GCF_001865475.1_ASM186547v1								ftp://ftp.ncbi.nlm.nih.gov/genomes/all/GCF/002/813/695/GCF_002813695.1_ASM281369v1
ftp://ftp.ncbi.nlm.nih.gov/genomes/all/GCA/000/915/755/GCA_000915755.1_ViralProj240035								ftp://ftp.ncbi.nlm.nih.gov/genomes/all/GCF/001/865/495/GCF_001865495.1_ASM186549v1								ftp://ftp.ncbi.nlm.nih.gov/genomes/all/GCF/002/214/385/GCF_002214385.1_ASM221438v1
ftp://ftp.ncbi.nlm.nih.gov/genomes/all/GCA/000/914/555/GCA_000914555.1_ViralProj239740								ftp://ftp.ncbi.nlm.nih.gov/genomes/all/GCF/001/865/515/GCF_001865515.1_ASM186551v1								ftp://ftp.ncbi.nlm.nih.gov/genomes/all/GCF/002/214/485/GCF_002214485.1_ASM221448v1
ftp://ftp.ncbi.nlm.nih.gov/genomes/all/GCA/000/914/595/GCA_000914595.1_ViralProj240009								ftp://ftp.ncbi.nlm.nih.gov/genomes/all/GCF/001/865/535/GCF_001865535.1_ASM186553v1								ftp://ftp.ncbi.nlm.nih.gov/genomes/all/GCF/002/214/505/GCF_002214505.1_ASM221450v1
ftp://ftp.ncbi.nlm.nih.gov/genomes/all/GCA/000/914/615/GCA_000914615.1_ViralProj240013								ftp://ftp.ncbi.nlm.nih.gov/genomes/all/GCF/001/865/555/GCF_001865555.1_ASM186555v1								ftp://ftp.ncbi.nlm.nih.gov/genomes/all/GCF/002/078/355/GCF_002078355.1_ASM207835v1
ftp://ftp.ncbi.nlm.nih.gov/genomes/all/GCA/000/914/655/GCA_000914655.1_ViralProj240021								ftp://ftp.ncbi.nlm.nih.gov/genomes/all/GCF/001/936/355/GCF_001936355.1_ASM193635v1								ftp://ftp.ncbi.nlm.nih.gov/genomes/all/GCF/000/304/355/GCF_000304355.2_Mb_MS2
ftp://ftp.ncbi.nlm.nih.gov/genomes/all/GCA/000/915/615/GCA_000915615.1_ViralProj240007								ftp://ftp.ncbi.nlm.nih.gov/genomes/all/GCF/002/024/185/GCF_002024185.1_ASM202418v1								ftp://ftp.ncbi.nlm.nih.gov/genomes/all/GCF/900/079/125/GCF_900079125.1_MBBA
ftp://ftp.ncbi.nlm.nih.gov/genomes/all/GCA/000/915/635/GCA_000915635.1_ViralProj240011								ftp://ftp.ncbi.nlm.nih.gov/genomes/all/GCF/002/407/145/GCF_002407145.1_ASM240714v1								ftp://ftp.ncbi.nlm.nih.gov/genomes/all/GCF/900/036/045/GCF_900036045.1_Methanoculleus_sp_MAB1
ftp://ftp.ncbi.nlm.nih.gov/genomes/all/GCA/000/915/655/GCA_000915655.1_ViralProj240015								ftp://ftp.ncbi.nlm.nih.gov/genomes/all/GCF/002/843/985/GCF_002843985.1_ASM284398v1								ftp://ftp.ncbi.nlm.nih.gov/genomes/all/GCF/000/816/105/GCF_000816105.1_ASM81610v1
ftp://ftp.ncbi.nlm.nih.gov/genomes/all/GCA/000/916/335/GCA_000916335.1_ViralProj240018								ftp://ftp.ncbi.nlm.nih.gov/genomes/all/GCF/000/512/745/GCF_000512745.2_ASM51274v2								ftp://ftp.ncbi.nlm.nih.gov/genomes/all/GCF/001/006/045/GCF_001006045.1_ASM100604v1
ftp://ftp.ncbi.nlm.nih.gov/genomes/all/GCA/000/916/355/GCA_000916355.1_ViralProj240022								ftp://ftp.ncbi.nlm.nih.gov/genomes/all/GCF/000/759/485/GCF_000759485.1_ASM75948v1								ftp://ftp.ncbi.nlm.nih.gov/genomes/all/GCF/900/095/295/GCF_900095295.1_MCBB
ftp://ftp.ncbi.nlm.nih.gov/genomes/all/GCA/000/917/095/GCA_000917095.1_ViralProj239739								ftp://ftp.ncbi.nlm.nih.gov/genomes/all/GCF/000/759/515/GCF_000759515.1_ASM75951v1								ftp://ftp.ncbi.nlm.nih.gov/genomes/all/GCF/002/214/525/GCF_002214525.1_ASM221452v1
ftp://ftp.ncbi.nlm.nih.gov/genomes/all/GCA/000/917/135/GCA_000917135.1_ViralProj240008								ftp://ftp.ncbi.nlm.nih.gov/genomes/all/GCF/000/814/265/GCF_000814265.1_ASM81426v1								ftp://ftp.ncbi.nlm.nih.gov/genomes/all/GCF/900/095/815/GCF_900095815.1_SIV6
ftp://ftp.ncbi.nlm.nih.gov/genomes/all/GCA/000/917/155/GCA_000917155.1_ViralProj240012								ftp://ftp.ncbi.nlm.nih.gov/genomes/all/GCF/000/967/135/GCF_000967135.1_CFV								ftp://ftp.ncbi.nlm.nih.gov/genomes/all/GCF/000/970/265/GCF_000970265.1_ASM97026v1
ftp://ftp.ncbi.nlm.nih.gov/genomes/all/GCA/000/916/255/GCA_000916255.1_ViralProj239741								ftp://ftp.ncbi.nlm.nih.gov/genomes/all/GCF/001/484/645/GCF_001484645.1_ASM148464v1								ftp://ftp.ncbi.nlm.nih.gov/genomes/all/GCF/002/214/565/GCF_002214565.1_ASM221456v1
ftp://ftp.ncbi.nlm.nih.gov/genomes/all/GCA/000/916/275/GCA_000916275.1_ViralProj240006								ftp://ftp.ncbi.nlm.nih.gov/genomes/all/GCF/001/686/885/GCF_001686885.1_ASM168688v1								ftp://ftp.ncbi.nlm.nih.gov/genomes/all/GCF/000/585/495/GCF_000585495.1_ASM58549v1
ftp://ftp.ncbi.nlm.nih.gov/genomes/all/GCA/002/603/985/GCA_002603985.1_ASM260398v1								ftp://ftp.ncbi.nlm.nih.gov/genomes/all/GCF/000/171/795/GCF_000171795.2_ASM17179v2								ftp://ftp.ncbi.nlm.nih.gov/genomes/all/GCF/000/226/975/GCF_000226975.2_ASM22697v3
ftp://ftp.ncbi.nlm.nih.gov/genomes/all/GCA/002/604/465/GCA_002604465.1_ASM260446v1								ftp://ftp.ncbi.nlm.nih.gov/genomes/all/GCF/000/302/555/GCF_000302555.5_ASM30255v4								ftp://ftp.ncbi.nlm.nih.gov/genomes/all/GCF/001/477/655/GCF_001477655.1_ASM147765v1
ftp://ftp.ncbi.nlm.nih.gov/genomes/all/GCA/000/914/535/GCA_000914535.1_ViralProj239736								ftp://ftp.ncbi.nlm.nih.gov/genomes/all/GCF/000/466/065/GCF_000466065.2_ASM46606v2								ftp://ftp.ncbi.nlm.nih.gov/genomes/all/GCF/002/214/545/GCF_002214545.1_ASM221454v1
ftp://ftp.ncbi.nlm.nih.gov/genomes/all/GCA/000/915/575/GCA_000915575.1_ViralProj239738								ftp://ftp.ncbi.nlm.nih.gov/genomes/all/GCF/000/466/075/GCF_000466075.2_ASM46607v2								ftp://ftp.ncbi.nlm.nih.gov/genomes/all/GCF/001/563/245/GCF_001563245.1_ASM156324v1
ftp://ftp.ncbi.nlm.nih.gov/genomes/all/GCA/000/915/675/GCA_000915675.1_ViralProj240019								ftp://ftp.ncbi.nlm.nih.gov/genomes/all/GCF/000/466/105/GCF_000466105.2_ASM46610v2								ftp://ftp.ncbi.nlm.nih.gov/genomes/all/GCF/000/517/625/GCF_000517625.1_ASM51762v1
ftp://ftp.ncbi.nlm.nih.gov/genomes/all/GCA/000/916/235/GCA_000916235.1_ViralProj239737								ftp://ftp.ncbi.nlm.nih.gov/genomes/all/GCF/000/468/915/GCF_000468915.2_ASM46891v2								ftp://ftp.ncbi.nlm.nih.gov/genomes/all/GCF/000/970/285/GCF_000970285.1_ASM97028v1
ftp://ftp.ncbi.nlm.nih.gov/genomes/all/GCA/000/918/975/GCA_000918975.1_ViralProj243068								ftp://ftp.ncbi.nlm.nih.gov/genomes/all/GCF/000/737/085/GCF_000737085.1_ASM73708v1								ftp://ftp.ncbi.nlm.nih.gov/genomes/all/GCF/000/789/255/GCF_000789255.1_ASM78925v1
ftp://ftp.ncbi.nlm.nih.gov/genomes/all/GCA/000/919/595/GCA_000919595.1_ViralProj243063								ftp://ftp.ncbi.nlm.nih.gov/genomes/all/GCF/000/772/225/GCF_000772225.1_ASM77222v1								ftp://ftp.ncbi.nlm.nih.gov/genomes/all/GCF/000/517/445/GCF_000517445.1_ASM51744v1
ftp://ftp.ncbi.nlm.nih.gov/genomes/all/GCA/000/922/775/GCA_000922775.1_ViralProj248634								ftp://ftp.ncbi.nlm.nih.gov/genomes/all/GCF/000/830/775/GCF_000830775.1_ASM83077v1								ftp://ftp.ncbi.nlm.nih.gov/genomes/all/GCF/001/971/705/GCF_001971705.1_ASM197170v1
ftp://ftp.ncbi.nlm.nih.gov/genomes/all/GCA/000/925/895/GCA_000925895.1_ViralProj266783								ftp://ftp.ncbi.nlm.nih.gov/genomes/all/GCF/000/830/805/GCF_000830805.1_ASM83080v1								ftp://ftp.ncbi.nlm.nih.gov/genomes/all/GCF/000/230/955/GCF_000230955.2_ASM23095v3
ftp://ftp.ncbi.nlm.nih.gov/genomes/all/GCA/000/918/455/GCA_000918455.1_ViralProj240244								ftp://ftp.ncbi.nlm.nih.gov/genomes/all/GCF/000/830/825/GCF_000830825.1_ASM83082v1								ftp://ftp.ncbi.nlm.nih.gov/genomes/all/GCF/002/906/575/GCF_002906575.1_ASM290657v1
ftp://ftp.ncbi.nlm.nih.gov/genomes/all/GCA/000/917/915/GCA_000917915.1_ViralProj242974								ftp://ftp.ncbi.nlm.nih.gov/genomes/all/GCF/000/830/845/GCF_000830845.1_ASM83084v1								ftp://ftp.ncbi.nlm.nih.gov/genomes/all/GCF/002/788/215/GCF_002788215.1_ASM278821v1
ftp://ftp.ncbi.nlm.nih.gov/genomes/all/GCA/002/633/165/GCA_002633165.1_ASM263316v1								ftp://ftp.ncbi.nlm.nih.gov/genomes/all/GCF/000/830/865/GCF_000830865.1_ASM83086v1								ftp://ftp.ncbi.nlm.nih.gov/genomes/all/GCF/002/813/655/GCF_002813655.1_ASM281365v1
ftp://ftp.ncbi.nlm.nih.gov/genomes/all/GCA/000/917/955/GCA_000917955.1_ViralProj243066								ftp://ftp.ncbi.nlm.nih.gov/genomes/all/GCF/000/835/285/GCF_000835285.1_ASM83528v1								ftp://ftp.ncbi.nlm.nih.gov/genomes/all/GCF/000/725/425/GCF_000725425.1_ASM72542v1
ftp://ftp.ncbi.nlm.nih.gov/genomes/all/GCA/002/867/895/GCA_002867895.1_ASM286789v1								ftp://ftp.ncbi.nlm.nih.gov/genomes/all/GCF/000/835/305/GCF_000835305.1_ASM83530v1								ftp://ftp.ncbi.nlm.nih.gov/genomes/all/GCF/000/698/785/GCF_000698785.1_ASM69878v1
ftp://ftp.ncbi.nlm.nih.gov/genomes/all/GCA/002/867/915/GCA_002867915.1_ASM286791v1								ftp://ftp.ncbi.nlm.nih.gov/genomes/all/GCF/000/835/345/GCF_000835345.1_ASM83534v1								ftp://ftp.ncbi.nlm.nih.gov/genomes/all/GCF/002/355/635/GCF_002355635.1_ASM235563v1
ftp://ftp.ncbi.nlm.nih.gov/genomes/all/GCA/002/867/995/GCA_002867995.1_ASM286799v1								ftp://ftp.ncbi.nlm.nih.gov/genomes/all/GCF/000/835/365/GCF_000835365.1_ASM83536v1								ftp://ftp.ncbi.nlm.nih.gov/genomes/all/GCF/001/412/615/GCF_001412615.1_ASM141261v1
ftp://ftp.ncbi.nlm.nih.gov/genomes/all/GCA/002/867/935/GCA_002867935.1_ASM286793v1								ftp://ftp.ncbi.nlm.nih.gov/genomes/all/GCF/000/934/305/GCF_000934305.1_ASM93430v1								ftp://ftp.ncbi.nlm.nih.gov/genomes/all/GCF/000/739/065/GCF_000739065.1_ASM73906v1
ftp://ftp.ncbi.nlm.nih.gov/genomes/all/GCA/002/867/955/GCA_002867955.1_ASM286795v1								ftp://ftp.ncbi.nlm.nih.gov/genomes/all/GCF/001/299/565/GCF_001299565.1_ASM129956v1								ftp://ftp.ncbi.nlm.nih.gov/genomes/all/GCF/001/488/575/GCF_001488575.1_Halobacterium_hubeiense_JI20-1
ftp://ftp.ncbi.nlm.nih.gov/genomes/all/GCA/002/867/975/GCA_002867975.1_ASM286797v1								ftp://ftp.ncbi.nlm.nih.gov/genomes/all/GCF/001/299/595/GCF_001299595.1_ASM129959v1								ftp://ftp.ncbi.nlm.nih.gov/genomes/all/GCF/000/812/185/GCF_000812185.1_ASM81218v1
ftp://ftp.ncbi.nlm.nih.gov/genomes/all/GCA/002/826/865/GCA_002826865.1_ASM282686v1								ftp://ftp.ncbi.nlm.nih.gov/genomes/all/GCF/001/314/285/GCF_001314285.1_ASM131428v1								ftp://ftp.ncbi.nlm.nih.gov/genomes/all/GCF/000/969/945/GCF_000969945.1_ASM96994v1
ftp://ftp.ncbi.nlm.nih.gov/genomes/all/GCA/002/826/905/GCA_002826905.1_ASM282690v1								ftp://ftp.ncbi.nlm.nih.gov/genomes/all/GCF/001/412/295/GCF_001412295.1_ASM141229v1								ftp://ftp.ncbi.nlm.nih.gov/genomes/all/GCF/000/970/045/GCF_000970045.1_ASM97004v1
ftp://ftp.ncbi.nlm.nih.gov/genomes/all/GCA/002/827/105/GCA_002827105.1_ASM282710v1								ftp://ftp.ncbi.nlm.nih.gov/genomes/all/GCF/001/457/695/GCF_001457695.1_NCTC11351								ftp://ftp.ncbi.nlm.nih.gov/genomes/all/GCF/000/970/005/GCF_000970005.1_ASM97000v1
ftp://ftp.ncbi.nlm.nih.gov/genomes/all/GCA/002/639/295/GCA_002639295.1_ASM263929v1								ftp://ftp.ncbi.nlm.nih.gov/genomes/all/GCF/001/506/185/GCF_001506185.1_ASM150618v1								ftp://ftp.ncbi.nlm.nih.gov/genomes/all/GCF/000/969/965/GCF_000969965.1_ASM96996v1
ftp://ftp.ncbi.nlm.nih.gov/genomes/all/GCA/000/918/955/GCA_000918955.1_ViralProj243064								ftp://ftp.ncbi.nlm.nih.gov/genomes/all/GCF/001/506/205/GCF_001506205.1_ASM150620v1								ftp://ftp.ncbi.nlm.nih.gov/genomes/all/GCF/000/813/245/GCF_000813245.1_ASM81324v1
ftp://ftp.ncbi.nlm.nih.gov/genomes/all/GCA/000/919/095/GCA_000919095.1_ViralProj243540								ftp://ftp.ncbi.nlm.nih.gov/genomes/all/GCF/001/506/225/GCF_001506225.1_ASM150622v1								ftp://ftp.ncbi.nlm.nih.gov/genomes/all/GCF/001/560/915/GCF_001560915.1_ASM156091v1
ftp://ftp.ncbi.nlm.nih.gov/genomes/all/GCA/000/919/495/GCA_000919495.1_ViralMultiSegProj242281								ftp://ftp.ncbi.nlm.nih.gov/genomes/all/GCF/001/506/245/GCF_001506245.1_ASM150624v1								ftp://ftp.ncbi.nlm.nih.gov/genomes/all/GCF/000/769/655/GCF_000769655.1_ASM76965v1
ftp://ftp.ncbi.nlm.nih.gov/genomes/all/GCA/002/644/055/GCA_002644055.1_ASM264405v1								ftp://ftp.ncbi.nlm.nih.gov/genomes/all/GCF/001/506/265/GCF_001506265.1_ASM150626v1								ftp://ftp.ncbi.nlm.nih.gov/genomes/all/GCF/000/993/805/GCF_000993805.1_ASM99380v1
ftp://ftp.ncbi.nlm.nih.gov/genomes/all/GCA/002/644/135/GCA_002644135.1_ASM264413v1								ftp://ftp.ncbi.nlm.nih.gov/genomes/all/GCF/001/506/285/GCF_001506285.1_ASM150628v1								ftp://ftp.ncbi.nlm.nih.gov/genomes/all/GCF/000/800/805/GCF_000800805.1_ASM80080v1
ftp://ftp.ncbi.nlm.nih.gov/genomes/all/GCA/002/644/215/GCA_002644215.1_ASM264421v1								ftp://ftp.ncbi.nlm.nih.gov/genomes/all/GCF/001/506/305/GCF_001506305.1_ASM150630v1								ftp://ftp.ncbi.nlm.nih.gov/genomes/all/GCF/000/956/175/GCF_000956175.1_ASM95617v1
ftp://ftp.ncbi.nlm.nih.gov/genomes/all/GCA/002/644/275/GCA_002644275.1_ASM264427v1								ftp://ftp.ncbi.nlm.nih.gov/genomes/all/GCF/001/506/345/GCF_001506345.1_ASM150634v1								ftp://ftp.ncbi.nlm.nih.gov/genomes/all/GCF/000/827/835/GCF_000827835.1_ASM82783v1
ftp://ftp.ncbi.nlm.nih.gov/genomes/all/GCA/002/644/295/GCA_002644295.1_ASM264429v1								ftp://ftp.ncbi.nlm.nih.gov/genomes/all/GCF/001/506/365/GCF_001506365.1_ASM150636v1								ftp://ftp.ncbi.nlm.nih.gov/genomes/all/GCF/000/955/905/GCF_000955905.1_ASM95590v3
ftp://ftp.ncbi.nlm.nih.gov/genomes/all/GCA/002/644/455/GCA_002644455.1_ASM264445v1								ftp://ftp.ncbi.nlm.nih.gov/genomes/all/GCF/001/506/385/GCF_001506385.1_ASM150638v1								ftp://ftp.ncbi.nlm.nih.gov/genomes/all/GCF/001/011/115/GCF_001011115.1_ASM101111v1
ftp://ftp.ncbi.nlm.nih.gov/genomes/all/GCA/002/644/535/GCA_002644535.1_ASM264453v1								ftp://ftp.ncbi.nlm.nih.gov/genomes/all/GCF/001/506/405/GCF_001506405.1_ASM150640v1								ftp://ftp.ncbi.nlm.nih.gov/genomes/all/GCF/001/305/655/GCF_001305655.1_ASM130565v1
ftp://ftp.ncbi.nlm.nih.gov/genomes/all/GCA/002/644/555/GCA_002644555.1_ASM264455v1								ftp://ftp.ncbi.nlm.nih.gov/genomes/all/GCF/001/506/425/GCF_001506425.1_ASM150642v1								ftp://ftp.ncbi.nlm.nih.gov/genomes/all/GCF/001/577/775/GCF_001577775.1_ASM157777v1
ftp://ftp.ncbi.nlm.nih.gov/genomes/all/GCA/002/644/575/GCA_002644575.1_ASM264457v1								ftp://ftp.ncbi.nlm.nih.gov/genomes/all/GCF/001/506/445/GCF_001506445.1_ASM150644v1								ftp://ftp.ncbi.nlm.nih.gov/genomes/all/GCF/001/548/675/GCF_001548675.1_ASM154867v1
ftp://ftp.ncbi.nlm.nih.gov/genomes/all/GCA/002/644/595/GCA_002644595.1_ASM264459v1								ftp://ftp.ncbi.nlm.nih.gov/genomes/all/GCF/001/506/465/GCF_001506465.1_ASM150646v1								ftp://ftp.ncbi.nlm.nih.gov/genomes/all/GCF/900/090/055/GCF_900090055.1_C.divulgatum_PM4
ftp://ftp.ncbi.nlm.nih.gov/genomes/all/GCA/002/644/635/GCA_002644635.1_ASM264463v1								ftp://ftp.ncbi.nlm.nih.gov/genomes/all/GCF/001/506/485/GCF_001506485.1_ASM150648v1								ftp://ftp.ncbi.nlm.nih.gov/genomes/all/GCF/001/484/685/GCF_001484685.1_ASM148468v1
ftp://ftp.ncbi.nlm.nih.gov/genomes/all/GCA/002/644/655/GCA_002644655.1_ASM264465v1								ftp://ftp.ncbi.nlm.nih.gov/genomes/all/GCF/001/506/505/GCF_001506505.1_ASM150650v1								ftp://ftp.ncbi.nlm.nih.gov/genomes/all/GCF/001/647/085/GCF_001647085.1_ASM164708v1
ftp://ftp.ncbi.nlm.nih.gov/genomes/all/GCA/002/644/675/GCA_002644675.1_ASM264467v1								ftp://ftp.ncbi.nlm.nih.gov/genomes/all/GCF/001/506/525/GCF_001506525.1_ASM150652v1								ftp://ftp.ncbi.nlm.nih.gov/genomes/all/GCF/002/787/055/GCF_002787055.1_ASM278705v1
ftp://ftp.ncbi.nlm.nih.gov/genomes/all/GCA/002/644/695/GCA_002644695.1_ASM264469v1								ftp://ftp.ncbi.nlm.nih.gov/genomes/all/GCF/001/506/545/GCF_001506545.1_ASM150654v1								ftp://ftp.ncbi.nlm.nih.gov/genomes/all/GCF/001/767/315/GCF_001767315.1_ASM176731v1
ftp://ftp.ncbi.nlm.nih.gov/genomes/all/GCA/002/644/715/GCA_002644715.1_ASM264471v1								ftp://ftp.ncbi.nlm.nih.gov/genomes/all/GCF/001/506/565/GCF_001506565.1_ASM150656v1								ftp://ftp.ncbi.nlm.nih.gov/genomes/all/GCF/001/886/955/GCF_001886955.1_ASM188695v1
ftp://ftp.ncbi.nlm.nih.gov/genomes/all/GCA/002/644/735/GCA_002644735.1_ASM264473v1								ftp://ftp.ncbi.nlm.nih.gov/genomes/all/GCF/001/506/585/GCF_001506585.1_ASM150658v1								ftp://ftp.ncbi.nlm.nih.gov/genomes/all/GCF/001/719/125/GCF_001719125.1_ASM171912v1
ftp://ftp.ncbi.nlm.nih.gov/genomes/all/GCA/002/644/755/GCA_002644755.1_ASM264475v1								ftp://ftp.ncbi.nlm.nih.gov/genomes/all/GCF/001/506/605/GCF_001506605.1_ASM150660v1								ftp://ftp.ncbi.nlm.nih.gov/genomes/all/GCF/002/156/965/GCF_002156965.1_ASM215696v1
ftp://ftp.ncbi.nlm.nih.gov/genomes/all/GCA/002/644/775/GCA_002644775.1_ASM264477v1								ftp://ftp.ncbi.nlm.nih.gov/genomes/all/GCF/001/506/625/GCF_001506625.1_ASM150662v1								ftp://ftp.ncbi.nlm.nih.gov/genomes/all/GCF/002/156/705/GCF_002156705.1_ASM215670v1
ftp://ftp.ncbi.nlm.nih.gov/genomes/all/GCA/002/644/795/GCA_002644795.1_ASM264479v1								ftp://ftp.ncbi.nlm.nih.gov/genomes/all/GCF/001/506/645/GCF_001506645.1_ASM150664v1								ftp://ftp.ncbi.nlm.nih.gov/genomes/all/GCF/002/813/675/GCF_002813675.1_ASM281367v1
ftp://ftp.ncbi.nlm.nih.gov/genomes/all/GCA/002/644/815/GCA_002644815.1_ASM264481v1								ftp://ftp.ncbi.nlm.nih.gov/genomes/all/GCF/001/506/665/GCF_001506665.1_ASM150666v1								ftp://ftp.ncbi.nlm.nih.gov/genomes/all/GCF/002/214/165/GCF_002214165.1_ASM221416v1
ftp://ftp.ncbi.nlm.nih.gov/genomes/all/GCA/002/644/855/GCA_002644855.1_ASM264485v1								ftp://ftp.ncbi.nlm.nih.gov/genomes/all/GCF/001/506/685/GCF_001506685.1_ASM150668v1								ftp://ftp.ncbi.nlm.nih.gov/genomes/all/GCF/002/844/335/GCF_002844335.1_ASM284433v1
ftp://ftp.ncbi.nlm.nih.gov/genomes/all/GCA/002/644/875/GCA_002644875.1_ASM264487v1								ftp://ftp.ncbi.nlm.nih.gov/genomes/all/GCF/001/506/705/GCF_001506705.1_ASM150670v1								ftp://ftp.ncbi.nlm.nih.gov/genomes/all/GCF/001/989/615/GCF_001989615.1_ASM198961v1
ftp://ftp.ncbi.nlm.nih.gov/genomes/all/GCA/002/644/895/GCA_002644895.1_ASM264489v1								ftp://ftp.ncbi.nlm.nih.gov/genomes/all/GCF/001/506/725/GCF_001506725.1_ASM150672v1								ftp://ftp.ncbi.nlm.nih.gov/genomes/all/GCF/002/197/185/GCF_002197185.1_ASM219718v1
ftp://ftp.ncbi.nlm.nih.gov/genomes/all/GCA/002/644/915/GCA_002644915.1_ASM264491v1								ftp://ftp.ncbi.nlm.nih.gov/genomes/all/GCF/001/506/745/GCF_001506745.1_ASM150674v1								ftp://ftp.ncbi.nlm.nih.gov/genomes/all/GCF/900/198/835/GCF_900198835.1_chr_EXT12c
ftp://ftp.ncbi.nlm.nih.gov/genomes/all/GCA/002/644/935/GCA_002644935.1_ASM264493v1								ftp://ftp.ncbi.nlm.nih.gov/genomes/all/GCF/001/506/765/GCF_001506765.1_ASM150676v1								ftp://ftp.ncbi.nlm.nih.gov/genomes/all/GCF/002/906/215/GCF_002906215.1_ASM290621v1
ftp://ftp.ncbi.nlm.nih.gov/genomes/all/GCA/002/645/695/GCA_002645695.1_ASM264569v1								ftp://ftp.ncbi.nlm.nih.gov/genomes/all/GCF/001/506/785/GCF_001506785.1_ASM150678v1
ftp://ftp.ncbi.nlm.nih.gov/genomes/all/GCA/002/645/775/GCA_002645775.1_ASM264577v1								ftp://ftp.ncbi.nlm.nih.gov/genomes/all/GCF/001/506/805/GCF_001506805.1_ASM150680v1
ftp://ftp.ncbi.nlm.nih.gov/genomes/all/GCA/000/920/475/GCA_000920475.1_ViralProj243247								ftp://ftp.ncbi.nlm.nih.gov/genomes/all/GCF/001/506/825/GCF_001506825.1_ASM150682v1
ftp://ftp.ncbi.nlm.nih.gov/genomes/all/GCA/000/918/315/GCA_000918315.1_ViralProj248632								ftp://ftp.ncbi.nlm.nih.gov/genomes/all/GCF/001/506/845/GCF_001506845.1_ASM150684v1
ftp://ftp.ncbi.nlm.nih.gov/genomes/all/GCA/002/644/995/GCA_002644995.1_ASM264499v1								ftp://ftp.ncbi.nlm.nih.gov/genomes/all/GCF/001/506/865/GCF_001506865.1_ASM150686v1
ftp://ftp.ncbi.nlm.nih.gov/genomes/all/GCA/002/645/115/GCA_002645115.1_ASM264511v1								ftp://ftp.ncbi.nlm.nih.gov/genomes/all/GCF/001/506/885/GCF_001506885.1_ASM150688v1
ftp://ftp.ncbi.nlm.nih.gov/genomes/all/GCA/002/645/135/GCA_002645135.1_ASM264513v1								ftp://ftp.ncbi.nlm.nih.gov/genomes/all/GCF/001/506/905/GCF_001506905.1_ASM150690v1
ftp://ftp.ncbi.nlm.nih.gov/genomes/all/GCA/002/645/155/GCA_002645155.1_ASM264515v1								ftp://ftp.ncbi.nlm.nih.gov/genomes/all/GCF/001/506/925/GCF_001506925.1_ASM150692v1
ftp://ftp.ncbi.nlm.nih.gov/genomes/all/GCA/002/645/175/GCA_002645175.1_ASM264517v1								ftp://ftp.ncbi.nlm.nih.gov/genomes/all/GCF/001/506/945/GCF_001506945.1_ASM150694v1
ftp://ftp.ncbi.nlm.nih.gov/genomes/all/GCA/002/645/195/GCA_002645195.1_ASM264519v1								ftp://ftp.ncbi.nlm.nih.gov/genomes/all/GCF/001/506/965/GCF_001506965.1_ASM150696v1
ftp://ftp.ncbi.nlm.nih.gov/genomes/all/GCA/002/645/255/GCA_002645255.1_ASM264525v1								ftp://ftp.ncbi.nlm.nih.gov/genomes/all/GCF/001/506/985/GCF_001506985.1_ASM150698v1
ftp://ftp.ncbi.nlm.nih.gov/genomes/all/GCA/002/645/315/GCA_002645315.1_ASM264531v1								ftp://ftp.ncbi.nlm.nih.gov/genomes/all/GCF/001/507/005/GCF_001507005.1_ASM150700v1
ftp://ftp.ncbi.nlm.nih.gov/genomes/all/GCA/002/645/475/GCA_002645475.1_ASM264547v1								ftp://ftp.ncbi.nlm.nih.gov/genomes/all/GCF/001/507/025/GCF_001507025.1_ASM150702v1
ftp://ftp.ncbi.nlm.nih.gov/genomes/all/GCA/002/645/595/GCA_002645595.1_ASM264559v1								ftp://ftp.ncbi.nlm.nih.gov/genomes/all/GCF/001/507/045/GCF_001507045.1_ASM150704v1
ftp://ftp.ncbi.nlm.nih.gov/genomes/all/GCA/002/645/755/GCA_002645755.1_ASM264575v1								ftp://ftp.ncbi.nlm.nih.gov/genomes/all/GCF/001/507/065/GCF_001507065.1_ASM150706v1
ftp://ftp.ncbi.nlm.nih.gov/genomes/all/GCA/002/671/255/GCA_002671255.1_ASM267125v1								ftp://ftp.ncbi.nlm.nih.gov/genomes/all/GCF/001/507/085/GCF_001507085.1_ASM150708v1
ftp://ftp.ncbi.nlm.nih.gov/genomes/all/GCA/002/671/275/GCA_002671275.1_ASM267127v1								ftp://ftp.ncbi.nlm.nih.gov/genomes/all/GCF/001/507/105/GCF_001507105.1_ASM150710v1
ftp://ftp.ncbi.nlm.nih.gov/genomes/all/GCA/002/671/295/GCA_002671295.1_ASM267129v1								ftp://ftp.ncbi.nlm.nih.gov/genomes/all/GCF/001/507/125/GCF_001507125.1_ASM150712v1
ftp://ftp.ncbi.nlm.nih.gov/genomes/all/GCA/002/671/315/GCA_002671315.1_ASM267131v1								ftp://ftp.ncbi.nlm.nih.gov/genomes/all/GCF/001/507/145/GCF_001507145.1_ASM150714v1
ftp://ftp.ncbi.nlm.nih.gov/genomes/all/GCA/002/671/355/GCA_002671355.1_ASM267135v1								ftp://ftp.ncbi.nlm.nih.gov/genomes/all/GCF/001/507/165/GCF_001507165.1_ASM150716v1
ftp://ftp.ncbi.nlm.nih.gov/genomes/all/GCA/002/671/375/GCA_002671375.1_ASM267137v1								ftp://ftp.ncbi.nlm.nih.gov/genomes/all/GCF/001/507/185/GCF_001507185.1_ASM150718v1
ftp://ftp.ncbi.nlm.nih.gov/genomes/all/GCA/002/671/395/GCA_002671395.1_ASM267139v1								ftp://ftp.ncbi.nlm.nih.gov/genomes/all/GCF/001/507/205/GCF_001507205.1_ASM150720v1
ftp://ftp.ncbi.nlm.nih.gov/genomes/all/GCA/002/671/415/GCA_002671415.1_ASM267141v1								ftp://ftp.ncbi.nlm.nih.gov/genomes/all/GCF/001/507/225/GCF_001507225.1_ASM150722v1
ftp://ftp.ncbi.nlm.nih.gov/genomes/all/GCA/002/671/435/GCA_002671435.1_ASM267143v1								ftp://ftp.ncbi.nlm.nih.gov/genomes/all/GCF/001/507/245/GCF_001507245.1_ASM150724v1
ftp://ftp.ncbi.nlm.nih.gov/genomes/all/GCA/002/671/455/GCA_002671455.1_ASM267145v1								ftp://ftp.ncbi.nlm.nih.gov/genomes/all/GCF/001/507/265/GCF_001507265.1_ASM150726v1
ftp://ftp.ncbi.nlm.nih.gov/genomes/all/GCA/002/671/475/GCA_002671475.1_ASM267147v1								ftp://ftp.ncbi.nlm.nih.gov/genomes/all/GCF/001/563/565/GCF_001563565.1_ASM156356v1
ftp://ftp.ncbi.nlm.nih.gov/genomes/all/GCA/000/918/095/GCA_000918095.1_ViralProj243630								ftp://ftp.ncbi.nlm.nih.gov/genomes/all/GCF/001/587/015/GCF_001587015.1_ASM158701v1
ftp://ftp.ncbi.nlm.nih.gov/genomes/all/GCA/002/671/115/GCA_002671115.1_ASM267111v1								ftp://ftp.ncbi.nlm.nih.gov/genomes/all/GCF/001/587/035/GCF_001587035.1_ASM158703v1
ftp://ftp.ncbi.nlm.nih.gov/genomes/all/GCA/002/671/335/GCA_002671335.1_ASM267133v1								ftp://ftp.ncbi.nlm.nih.gov/genomes/all/GCF/001/686/905/GCF_001686905.1_ASM168690v1
ftp://ftp.ncbi.nlm.nih.gov/genomes/all/GCA/002/671/555/GCA_002671555.1_ASM267155v1								ftp://ftp.ncbi.nlm.nih.gov/genomes/all/GCF/001/717/625/GCF_001717625.1_ASM171762v1
ftp://ftp.ncbi.nlm.nih.gov/genomes/all/GCA/002/671/795/GCA_002671795.1_ASM267179v1								ftp://ftp.ncbi.nlm.nih.gov/genomes/all/GCF/001/721/945/GCF_001721945.1_ASM172194v1
ftp://ftp.ncbi.nlm.nih.gov/genomes/all/GCA/002/672/015/GCA_002672015.1_ASM267201v1								ftp://ftp.ncbi.nlm.nih.gov/genomes/all/GCF/001/721/965/GCF_001721965.1_ASM172196v1
ftp://ftp.ncbi.nlm.nih.gov/genomes/all/GCA/000/920/615/GCA_000920615.1_ViralProj243633								ftp://ftp.ncbi.nlm.nih.gov/genomes/all/GCF/001/721/985/GCF_001721985.1_ASM172198v1
ftp://ftp.ncbi.nlm.nih.gov/genomes/all/GCA/000/920/035/GCA_000920035.1_ViralProj249091								ftp://ftp.ncbi.nlm.nih.gov/genomes/all/GCF/001/767/215/GCF_001767215.1_ASM176721v1
ftp://ftp.ncbi.nlm.nih.gov/genomes/all/GCA/000/922/715/GCA_000922715.1_ViralProj248532								ftp://ftp.ncbi.nlm.nih.gov/genomes/all/GCF/001/865/395/GCF_001865395.1_ASM186539v1
ftp://ftp.ncbi.nlm.nih.gov/genomes/all/GCA/002/604/545/GCA_002604545.1_ASM260454v1								ftp://ftp.ncbi.nlm.nih.gov/genomes/all/GCF/001/865/415/GCF_001865415.1_ASM186541v1
ftp://ftp.ncbi.nlm.nih.gov/genomes/all/GCA/000/919/755/GCA_000919755.1_ViralProj243631								ftp://ftp.ncbi.nlm.nih.gov/genomes/all/GCF/001/865/435/GCF_001865435.1_ASM186543v1
ftp://ftp.ncbi.nlm.nih.gov/genomes/all/GCA/000/918/295/GCA_000918295.1_ViralProj248628								ftp://ftp.ncbi.nlm.nih.gov/genomes/all/GCF/001/865/595/GCF_001865595.1_ASM186559v1
ftp://ftp.ncbi.nlm.nih.gov/genomes/all/GCA/000/918/335/GCA_000918335.1_ViralProj248636								ftp://ftp.ncbi.nlm.nih.gov/genomes/all/GCF/001/870/085/GCF_001870085.1_ASM187008v1
ftp://ftp.ncbi.nlm.nih.gov/genomes/all/GCA/000/920/595/GCA_000920595.1_ViralProj243629								ftp://ftp.ncbi.nlm.nih.gov/genomes/all/GCF/001/870/105/GCF_001870105.1_ASM187010v1
ftp://ftp.ncbi.nlm.nih.gov/genomes/all/GCA/000/920/815/GCA_000920815.1_ViralProj248627								ftp://ftp.ncbi.nlm.nih.gov/genomes/all/GCF/001/951/235/GCF_001951235.1_ASM195123v1
ftp://ftp.ncbi.nlm.nih.gov/genomes/all/GCA/000/920/975/GCA_000920975.1_ViralProj251394								ftp://ftp.ncbi.nlm.nih.gov/genomes/all/GCF/001/951/255/GCF_001951255.1_ASM195125v1
ftp://ftp.ncbi.nlm.nih.gov/genomes/all/GCA/000/919/915/GCA_000919915.2_ViralProj248321								ftp://ftp.ncbi.nlm.nih.gov/genomes/all/GCF/001/951/275/GCF_001951275.1_ASM195127v1
ftp://ftp.ncbi.nlm.nih.gov/genomes/all/GCA/000/922/735/GCA_000922735.2_ViralProj248626								ftp://ftp.ncbi.nlm.nih.gov/genomes/all/GCF/001/951/295/GCF_001951295.1_ASM195129v1
ftp://ftp.ncbi.nlm.nih.gov/genomes/all/GCA/001/470/175/GCA_001470175.1_ViralProj306302								ftp://ftp.ncbi.nlm.nih.gov/genomes/all/GCF/001/951/315/GCF_001951315.1_ASM195131v1
ftp://ftp.ncbi.nlm.nih.gov/genomes/all/GCA/002/604/445/GCA_002604445.1_ASM260444v1								ftp://ftp.ncbi.nlm.nih.gov/genomes/all/GCF/001/951/335/GCF_001951335.1_ASM195133v1
ftp://ftp.ncbi.nlm.nih.gov/genomes/all/GCA/002/604/565/GCA_002604565.1_ASM260456v1								ftp://ftp.ncbi.nlm.nih.gov/genomes/all/GCF/002/024/325/GCF_002024325.1_ASM202432v1
ftp://ftp.ncbi.nlm.nih.gov/genomes/all/GCA/002/755/995/GCA_002755995.1_ASM275599v1								ftp://ftp.ncbi.nlm.nih.gov/genomes/all/GCF/002/028/305/GCF_002028305.1_ASM202830v1
ftp://ftp.ncbi.nlm.nih.gov/genomes/all/GCA/002/756/035/GCA_002756035.1_ASM275603v1								ftp://ftp.ncbi.nlm.nih.gov/genomes/all/GCF/002/101/355/GCF_002101355.1_ASM210135v1
ftp://ftp.ncbi.nlm.nih.gov/genomes/all/GCA/002/756/055/GCA_002756055.1_ASM275605v1								ftp://ftp.ncbi.nlm.nih.gov/genomes/all/GCF/002/209/005/GCF_002209005.1_ASM220900v1
ftp://ftp.ncbi.nlm.nih.gov/genomes/all/GCA/002/756/015/GCA_002756015.1_ASM275601v1								ftp://ftp.ncbi.nlm.nih.gov/genomes/all/GCF/002/209/025/GCF_002209025.1_ASM220902v1
ftp://ftp.ncbi.nlm.nih.gov/genomes/all/GCA/002/755/935/GCA_002755935.1_ASM275593v1								ftp://ftp.ncbi.nlm.nih.gov/genomes/all/GCF/002/209/045/GCF_002209045.1_ASM220904v1
ftp://ftp.ncbi.nlm.nih.gov/genomes/all/GCA/002/755/955/GCA_002755955.1_ASM275595v1								ftp://ftp.ncbi.nlm.nih.gov/genomes/all/GCF/002/209/065/GCF_002209065.1_ASM220906v1
ftp://ftp.ncbi.nlm.nih.gov/genomes/all/GCA/002/755/975/GCA_002755975.1_ASM275597v1								ftp://ftp.ncbi.nlm.nih.gov/genomes/all/GCF/002/214/785/GCF_002214785.1_ASM221478v1
ftp://ftp.ncbi.nlm.nih.gov/genomes/all/GCA/002/756/075/GCA_002756075.1_ASM275607v1								ftp://ftp.ncbi.nlm.nih.gov/genomes/all/GCF/002/224/325/GCF_002224325.1_ASM222432v1
ftp://ftp.ncbi.nlm.nih.gov/genomes/all/GCA/001/507/495/GCA_001507495.1_ViralProj249087								ftp://ftp.ncbi.nlm.nih.gov/genomes/all/GCF/002/224/385/GCF_002224385.1_ASM222438v1
ftp://ftp.ncbi.nlm.nih.gov/genomes/all/GCA/002/745/615/GCA_002745615.1_ASM274561v1								ftp://ftp.ncbi.nlm.nih.gov/genomes/all/GCF/002/234/455/GCF_002234455.1_ASM223445v1
ftp://ftp.ncbi.nlm.nih.gov/genomes/all/GCA/002/755/555/GCA_002755555.1_ASM275555v1								ftp://ftp.ncbi.nlm.nih.gov/genomes/all/GCF/002/238/375/GCF_002238375.1_ASM223837v1
ftp://ftp.ncbi.nlm.nih.gov/genomes/all/GCA/002/595/165/GCA_002595165.1_ASM259516v1								ftp://ftp.ncbi.nlm.nih.gov/genomes/all/GCF/002/407/125/GCF_002407125.1_ASM240712v1
ftp://ftp.ncbi.nlm.nih.gov/genomes/all/GCA/002/595/185/GCA_002595185.1_ASM259518v1								ftp://ftp.ncbi.nlm.nih.gov/genomes/all/GCF/002/587/105/GCF_002587105.1_ASM258710v1
ftp://ftp.ncbi.nlm.nih.gov/genomes/all/GCA/002/755/595/GCA_002755595.1_ASM275559v1								ftp://ftp.ncbi.nlm.nih.gov/genomes/all/GCF/002/587/225/GCF_002587225.1_ASM258722v1
ftp://ftp.ncbi.nlm.nih.gov/genomes/all/GCA/002/755/575/GCA_002755575.1_ASM275557v1								ftp://ftp.ncbi.nlm.nih.gov/genomes/all/GCF/001/643/955/GCF_001643955.1_ASM164395v1
ftp://ftp.ncbi.nlm.nih.gov/genomes/all/GCA/000/918/235/GCA_000918235.1_ViralProj248320								ftp://ftp.ncbi.nlm.nih.gov/genomes/all/GCF/001/643/975/GCF_001643975.1_ASM164397v1
ftp://ftp.ncbi.nlm.nih.gov/genomes/all/GCA/000/920/915/GCA_000920915.1_ViralProj251389								ftp://ftp.ncbi.nlm.nih.gov/genomes/all/GCF/000/017/725/GCF_000017725.2_ASM1772v2
ftp://ftp.ncbi.nlm.nih.gov/genomes/all/GCA/000/920/955/GCA_000920955.1_ViralProj251390								ftp://ftp.ncbi.nlm.nih.gov/genomes/all/GCF/001/298/465/GCF_001298465.1_ASM129846v1
ftp://ftp.ncbi.nlm.nih.gov/genomes/all/GCA/000/922/855/GCA_000922855.1_ViralProj251392								ftp://ftp.ncbi.nlm.nih.gov/genomes/all/GCF/000/017/465/GCF_000017465.2_ASM1746v2
ftp://ftp.ncbi.nlm.nih.gov/genomes/all/GCA/000/922/915/GCA_000922915.1_ViralProj253206								ftp://ftp.ncbi.nlm.nih.gov/genomes/all/GCF/000/816/225/GCF_000816225.1_ASM81622v1
ftp://ftp.ncbi.nlm.nih.gov/genomes/all/GCA/000/923/495/GCA_000923495.1_ViralProj251393								ftp://ftp.ncbi.nlm.nih.gov/genomes/all/GCF/000/816/365/GCF_000816365.1_ASM81636v1
ftp://ftp.ncbi.nlm.nih.gov/genomes/all/GCA/000/922/695/GCA_000922695.1_ViralProj248322								ftp://ftp.ncbi.nlm.nih.gov/genomes/all/GCF/000/816/385/GCF_000816385.2_ASM81638v2
ftp://ftp.ncbi.nlm.nih.gov/genomes/all/GCA/001/470/715/GCA_001470715.1_ViralProj306301								ftp://ftp.ncbi.nlm.nih.gov/genomes/all/GCF/000/816/405/GCF_000816405.1_ASM81640v1
ftp://ftp.ncbi.nlm.nih.gov/genomes/all/GCA/002/644/015/GCA_002644015.1_ASM264401v1								ftp://ftp.ncbi.nlm.nih.gov/genomes/all/GCF/000/816/425/GCF_000816425.1_ASM81642v1
ftp://ftp.ncbi.nlm.nih.gov/genomes/all/GCA/002/644/035/GCA_002644035.1_ASM264403v1								ftp://ftp.ncbi.nlm.nih.gov/genomes/all/GCF/001/017/575/GCF_001017575.1_ASM101757v1
ftp://ftp.ncbi.nlm.nih.gov/genomes/all/GCA/002/644/075/GCA_002644075.1_ASM264407v1								ftp://ftp.ncbi.nlm.nih.gov/genomes/all/GCF/002/220/735/GCF_002220735.1_ASM222073v1
ftp://ftp.ncbi.nlm.nih.gov/genomes/all/GCA/002/644/095/GCA_002644095.1_ASM264409v1								ftp://ftp.ncbi.nlm.nih.gov/genomes/all/GCF/002/220/755/GCF_002220755.1_ASM222075v1
ftp://ftp.ncbi.nlm.nih.gov/genomes/all/GCA/002/644/115/GCA_002644115.1_ASM264411v1								ftp://ftp.ncbi.nlm.nih.gov/genomes/all/GCF/002/220/775/GCF_002220775.1_ASM222077v1
ftp://ftp.ncbi.nlm.nih.gov/genomes/all/GCA/002/644/155/GCA_002644155.1_ASM264415v1								ftp://ftp.ncbi.nlm.nih.gov/genomes/all/GCF/002/220/795/GCF_002220795.1_ASM222079v1
ftp://ftp.ncbi.nlm.nih.gov/genomes/all/GCA/002/644/195/GCA_002644195.1_ASM264419v1								ftp://ftp.ncbi.nlm.nih.gov/genomes/all/GCF/000/392/455/GCF_000392455.3_ASM39245v3
ftp://ftp.ncbi.nlm.nih.gov/genomes/all/GCA/002/644/235/GCA_002644235.1_ASM264423v1								ftp://ftp.ncbi.nlm.nih.gov/genomes/all/GCF/000/392/475/GCF_000392475.3_ASM39247v3
ftp://ftp.ncbi.nlm.nih.gov/genomes/all/GCA/002/644/255/GCA_002644255.1_ASM264425v1								ftp://ftp.ncbi.nlm.nih.gov/genomes/all/GCF/000/392/515/GCF_000392515.3_ASM39251v3
ftp://ftp.ncbi.nlm.nih.gov/genomes/all/GCA/002/644/315/GCA_002644315.1_ASM264431v1								ftp://ftp.ncbi.nlm.nih.gov/genomes/all/GCF/000/392/535/GCF_000392535.3_ASM39253v3
ftp://ftp.ncbi.nlm.nih.gov/genomes/all/GCA/002/644/335/GCA_002644335.1_ASM264433v1								ftp://ftp.ncbi.nlm.nih.gov/genomes/all/GCF/000/439/295/GCF_000439295.2_ASM43929v2
ftp://ftp.ncbi.nlm.nih.gov/genomes/all/GCA/002/644/355/GCA_002644355.1_ASM264435v1								ftp://ftp.ncbi.nlm.nih.gov/genomes/all/GCF/000/600/045/GCF_000600045.1_ASM60004v1
ftp://ftp.ncbi.nlm.nih.gov/genomes/all/GCA/002/644/375/GCA_002644375.1_ASM264437v1								ftp://ftp.ncbi.nlm.nih.gov/genomes/all/GCF/000/600/085/GCF_000600085.1_ASM60008v1
ftp://ftp.ncbi.nlm.nih.gov/genomes/all/GCA/002/644/415/GCA_002644415.1_ASM264441v1								ftp://ftp.ncbi.nlm.nih.gov/genomes/all/GCF/000/600/125/GCF_000600125.1_ASM60012v1
ftp://ftp.ncbi.nlm.nih.gov/genomes/all/GCA/002/644/435/GCA_002644435.1_ASM264443v1								ftp://ftp.ncbi.nlm.nih.gov/genomes/all/GCF/000/600/145/GCF_000600145.1_ASM60014v1
ftp://ftp.ncbi.nlm.nih.gov/genomes/all/GCA/002/644/475/GCA_002644475.1_ASM264447v1								ftp://ftp.ncbi.nlm.nih.gov/genomes/all/GCF/000/600/165/GCF_000600165.1_ASM60016v1
ftp://ftp.ncbi.nlm.nih.gov/genomes/all/GCA/002/644/495/GCA_002644495.1_ASM264449v1								ftp://ftp.ncbi.nlm.nih.gov/genomes/all/GCF/000/600/185/GCF_000600185.1_ASM60018v1
ftp://ftp.ncbi.nlm.nih.gov/genomes/all/GCA/002/644/515/GCA_002644515.1_ASM264451v1								ftp://ftp.ncbi.nlm.nih.gov/genomes/all/GCF/000/600/205/GCF_000600205.1_ASM60020v1
ftp://ftp.ncbi.nlm.nih.gov/genomes/all/GCA/002/644/955/GCA_002644955.1_ASM264495v1								ftp://ftp.ncbi.nlm.nih.gov/genomes/all/GCF/000/600/225/GCF_000600225.1_ASM60022v1
ftp://ftp.ncbi.nlm.nih.gov/genomes/all/GCA/002/644/975/GCA_002644975.1_ASM264497v1								ftp://ftp.ncbi.nlm.nih.gov/genomes/all/GCF/000/685/625/GCF_000685625.1_ASM68562v1
ftp://ftp.ncbi.nlm.nih.gov/genomes/all/GCA/002/645/015/GCA_002645015.1_ASM264501v1								ftp://ftp.ncbi.nlm.nih.gov/genomes/all/GCF/000/685/665/GCF_000685665.1_ASM68566v1
ftp://ftp.ncbi.nlm.nih.gov/genomes/all/GCA/002/645/035/GCA_002645035.1_ASM264503v1								ftp://ftp.ncbi.nlm.nih.gov/genomes/all/GCF/000/685/705/GCF_000685705.1_ASM68570v1
ftp://ftp.ncbi.nlm.nih.gov/genomes/all/GCA/002/645/075/GCA_002645075.1_ASM264507v1								ftp://ftp.ncbi.nlm.nih.gov/genomes/all/GCF/000/685/745/GCF_000685745.1_ASM68574v1
ftp://ftp.ncbi.nlm.nih.gov/genomes/all/GCA/002/645/095/GCA_002645095.1_ASM264509v1								ftp://ftp.ncbi.nlm.nih.gov/genomes/all/GCF/000/817/025/GCF_000817025.1_ASM81702v1
ftp://ftp.ncbi.nlm.nih.gov/genomes/all/GCA/002/645/215/GCA_002645215.1_ASM264521v1								ftp://ftp.ncbi.nlm.nih.gov/genomes/all/GCF/000/826/985/GCF_000826985.1_ASM82698v1
ftp://ftp.ncbi.nlm.nih.gov/genomes/all/GCA/002/645/235/GCA_002645235.1_ASM264523v1								ftp://ftp.ncbi.nlm.nih.gov/genomes/all/GCF/000/827/025/GCF_000827025.1_ASM82702v1
ftp://ftp.ncbi.nlm.nih.gov/genomes/all/GCA/002/645/295/GCA_002645295.1_ASM264529v1								ftp://ftp.ncbi.nlm.nih.gov/genomes/all/GCF/000/828/955/GCF_000828955.1_ASM82895v1
ftp://ftp.ncbi.nlm.nih.gov/genomes/all/GCA/002/645/335/GCA_002645335.1_ASM264533v1								ftp://ftp.ncbi.nlm.nih.gov/genomes/all/GCF/000/982/695/GCF_000982695.1_ASM98269v1
ftp://ftp.ncbi.nlm.nih.gov/genomes/all/GCA/002/645/355/GCA_002645355.1_ASM264535v1								ftp://ftp.ncbi.nlm.nih.gov/genomes/all/GCF/001/433/495/GCF_001433495.1_ASM143349v1
ftp://ftp.ncbi.nlm.nih.gov/genomes/all/GCA/002/645/375/GCA_002645375.1_ASM264537v1								ftp://ftp.ncbi.nlm.nih.gov/genomes/all/GCF/001/433/515/GCF_001433515.1_ASM143351v1
ftp://ftp.ncbi.nlm.nih.gov/genomes/all/GCA/002/645/395/GCA_002645395.1_ASM264539v1								ftp://ftp.ncbi.nlm.nih.gov/genomes/all/GCF/001/653/375/GCF_001653375.1_ASM165337v1
ftp://ftp.ncbi.nlm.nih.gov/genomes/all/GCA/002/645/415/GCA_002645415.1_ASM264541v1								ftp://ftp.ncbi.nlm.nih.gov/genomes/all/GCF/001/653/395/GCF_001653395.1_ASM165339v1
ftp://ftp.ncbi.nlm.nih.gov/genomes/all/GCA/002/645/435/GCA_002645435.1_ASM264543v1								ftp://ftp.ncbi.nlm.nih.gov/genomes/all/GCF/001/653/415/GCF_001653415.1_ASM165341v1
ftp://ftp.ncbi.nlm.nih.gov/genomes/all/GCA/002/645/455/GCA_002645455.1_ASM264545v1								ftp://ftp.ncbi.nlm.nih.gov/genomes/all/GCF/001/653/435/GCF_001653435.1_ASM165343v1
ftp://ftp.ncbi.nlm.nih.gov/genomes/all/GCA/002/645/515/GCA_002645515.1_ASM264551v1								ftp://ftp.ncbi.nlm.nih.gov/genomes/all/GCF/001/653/455/GCF_001653455.1_ASM165345v1
ftp://ftp.ncbi.nlm.nih.gov/genomes/all/GCA/002/645/535/GCA_002645535.1_ASM264553v1								ftp://ftp.ncbi.nlm.nih.gov/genomes/all/GCF/001/653/475/GCF_001653475.1_ASM165347v1
ftp://ftp.ncbi.nlm.nih.gov/genomes/all/GCA/002/645/555/GCA_002645555.1_ASM264555v1								ftp://ftp.ncbi.nlm.nih.gov/genomes/all/GCF/001/991/095/GCF_001991095.1_ASM199109v1
ftp://ftp.ncbi.nlm.nih.gov/genomes/all/GCA/002/645/575/GCA_002645575.1_ASM264557v1								ftp://ftp.ncbi.nlm.nih.gov/genomes/all/GCF/002/005/525/GCF_002005525.1_ASM200552v1
ftp://ftp.ncbi.nlm.nih.gov/genomes/all/GCA/002/645/615/GCA_002645615.1_ASM264561v1								ftp://ftp.ncbi.nlm.nih.gov/genomes/all/GCF/002/222/575/GCF_002222575.1_ASM222257v1
ftp://ftp.ncbi.nlm.nih.gov/genomes/all/GCA/002/645/635/GCA_002645635.1_ASM264563v1								ftp://ftp.ncbi.nlm.nih.gov/genomes/all/GCF/002/356/595/GCF_002356595.1_ASM235659v1
ftp://ftp.ncbi.nlm.nih.gov/genomes/all/GCA/002/645/655/GCA_002645655.1_ASM264565v1								ftp://ftp.ncbi.nlm.nih.gov/genomes/all/GCF/002/906/495/GCF_002906495.1_ASM290649v1
ftp://ftp.ncbi.nlm.nih.gov/genomes/all/GCA/002/645/675/GCA_002645675.1_ASM264567v1								ftp://ftp.ncbi.nlm.nih.gov/genomes/all/GCF/002/906/515/GCF_002906515.1_ASM290651v1
ftp://ftp.ncbi.nlm.nih.gov/genomes/all/GCA/002/669/295/GCA_002669295.1_ASM266929v1								ftp://ftp.ncbi.nlm.nih.gov/genomes/all/GCF/002/906/535/GCF_002906535.1_ASM290653v1
ftp://ftp.ncbi.nlm.nih.gov/genomes/all/GCA/002/680/895/GCA_002680895.1_ASM268089v1								ftp://ftp.ncbi.nlm.nih.gov/genomes/all/GCF/002/906/555/GCF_002906555.1_ASM290655v1
ftp://ftp.ncbi.nlm.nih.gov/genomes/all/GCA/002/680/915/GCA_002680915.1_ASM268091v1								ftp://ftp.ncbi.nlm.nih.gov/genomes/all/GCF/900/119/955/GCF_900119955.1_HE171_09
ftp://ftp.ncbi.nlm.nih.gov/genomes/all/GCA/002/680/935/GCA_002680935.1_ASM268093v1								ftp://ftp.ncbi.nlm.nih.gov/genomes/all/GCF/900/119/995/GCF_900119995.1_HE143_09
ftp://ftp.ncbi.nlm.nih.gov/genomes/all/GCA/002/680/955/GCA_002680955.1_ASM268095v1								ftp://ftp.ncbi.nlm.nih.gov/genomes/all/GCF/900/120/055/GCF_900120055.1_HE178_09
ftp://ftp.ncbi.nlm.nih.gov/genomes/all/GCA/002/680/975/GCA_002680975.1_ASM268097v1								ftp://ftp.ncbi.nlm.nih.gov/genomes/all/GCF/900/120/135/GCF_900120135.1_HE132_09
ftp://ftp.ncbi.nlm.nih.gov/genomes/all/GCA/002/680/995/GCA_002680995.1_ASM268099v1								ftp://ftp.ncbi.nlm.nih.gov/genomes/all/GCF/900/120/185/GCF_900120185.1_HE134_09
ftp://ftp.ncbi.nlm.nih.gov/genomes/all/GCA/002/681/015/GCA_002681015.1_ASM268101v1								ftp://ftp.ncbi.nlm.nih.gov/genomes/all/GCF/900/120/205/GCF_900120205.1_HE141_09
ftp://ftp.ncbi.nlm.nih.gov/genomes/all/GCA/002/681/035/GCA_002681035.1_ASM268103v1								ftp://ftp.ncbi.nlm.nih.gov/genomes/all/GCF/900/120/225/GCF_900120225.1_HE136_09
ftp://ftp.ncbi.nlm.nih.gov/genomes/all/GCA/002/681/075/GCA_002681075.1_ASM268107v1								ftp://ftp.ncbi.nlm.nih.gov/genomes/all/GCF/900/120/255/GCF_900120255.1_HE101_09
ftp://ftp.ncbi.nlm.nih.gov/genomes/all/GCA/002/681/095/GCA_002681095.1_ASM268109v1								ftp://ftp.ncbi.nlm.nih.gov/genomes/all/GCF/900/120/275/GCF_900120275.1_HE142_09
ftp://ftp.ncbi.nlm.nih.gov/genomes/all/GCA/002/681/115/GCA_002681115.1_ASM268111v1								ftp://ftp.ncbi.nlm.nih.gov/genomes/all/GCF/900/120/315/GCF_900120315.1_HE170_09
ftp://ftp.ncbi.nlm.nih.gov/genomes/all/GCA/002/681/155/GCA_002681155.1_ASM268115v1								ftp://ftp.ncbi.nlm.nih.gov/genomes/all/GCF/900/120/335/GCF_900120335.1_HE147_09
ftp://ftp.ncbi.nlm.nih.gov/genomes/all/GCA/002/681/195/GCA_002681195.1_ASM268119v1								ftp://ftp.ncbi.nlm.nih.gov/genomes/all/GCF/900/149/805/GCF_900149805.1_BCM-300
ftp://ftp.ncbi.nlm.nih.gov/genomes/all/GCA/002/681/215/GCA_002681215.1_ASM268121v1								ftp://ftp.ncbi.nlm.nih.gov/genomes/all/GCF/900/176/185/GCF_900176185.1_HE93_10
ftp://ftp.ncbi.nlm.nih.gov/genomes/all/GCA/002/681/235/GCA_002681235.1_ASM268123v1								ftp://ftp.ncbi.nlm.nih.gov/genomes/all/GCF/000/740/135/GCF_000740135.1_ASM74013v1
ftp://ftp.ncbi.nlm.nih.gov/genomes/all/GCA/002/681/255/GCA_002681255.1_ASM268125v1								ftp://ftp.ncbi.nlm.nih.gov/genomes/all/GCF/000/740/155/GCF_000740155.1_ASM74015v1
ftp://ftp.ncbi.nlm.nih.gov/genomes/all/GCA/002/681/315/GCA_002681315.1_ASM268131v1								ftp://ftp.ncbi.nlm.nih.gov/genomes/all/GCF/000/740/175/GCF_000740175.1_ASM74017v1
ftp://ftp.ncbi.nlm.nih.gov/genomes/all/GCA/002/681/335/GCA_002681335.1_ASM268133v1								ftp://ftp.ncbi.nlm.nih.gov/genomes/all/GCF/000/740/195/GCF_000740195.1_ASM74019v1
ftp://ftp.ncbi.nlm.nih.gov/genomes/all/GCA/002/681/355/GCA_002681355.1_ASM268135v1								ftp://ftp.ncbi.nlm.nih.gov/genomes/all/GCF/000/740/215/GCF_000740215.1_ASM74021v1
ftp://ftp.ncbi.nlm.nih.gov/genomes/all/GCA/002/681/375/GCA_002681375.1_ASM268137v1								ftp://ftp.ncbi.nlm.nih.gov/genomes/all/GCF/000/740/295/GCF_000740295.1_ASM74029v1
ftp://ftp.ncbi.nlm.nih.gov/genomes/all/GCA/002/681/455/GCA_002681455.1_ASM268145v1								ftp://ftp.ncbi.nlm.nih.gov/genomes/all/GCF/000/740/315/GCF_000740315.1_ASM74031v1
ftp://ftp.ncbi.nlm.nih.gov/genomes/all/GCA/002/681/475/GCA_002681475.1_ASM268147v1								ftp://ftp.ncbi.nlm.nih.gov/genomes/all/GCF/000/740/375/GCF_000740375.1_ASM74037v1
ftp://ftp.ncbi.nlm.nih.gov/genomes/all/GCA/002/681/515/GCA_002681515.1_ASM268151v1								ftp://ftp.ncbi.nlm.nih.gov/genomes/all/GCF/001/043/295/GCF_001043295.1_ASM104329v1
ftp://ftp.ncbi.nlm.nih.gov/genomes/all/GCA/002/681/555/GCA_002681555.1_ASM268155v1								ftp://ftp.ncbi.nlm.nih.gov/genomes/all/GCF/001/296/965/GCF_001296965.1_ASM129696v1
ftp://ftp.ncbi.nlm.nih.gov/genomes/all/GCA/002/681/595/GCA_002681595.1_ASM268159v1								ftp://ftp.ncbi.nlm.nih.gov/genomes/all/GCF/002/262/975/GCF_002262975.1_ASM226297v1
ftp://ftp.ncbi.nlm.nih.gov/genomes/all/GCA/002/681/615/GCA_002681615.1_ASM268161v1								ftp://ftp.ncbi.nlm.nih.gov/genomes/all/GCF/002/262/995/GCF_002262995.1_ASM226299v1
ftp://ftp.ncbi.nlm.nih.gov/genomes/all/GCA/002/681/635/GCA_002681635.1_ASM268163v1								ftp://ftp.ncbi.nlm.nih.gov/genomes/all/GCF/002/895/145/GCF_002895145.1_ASM289514v1
ftp://ftp.ncbi.nlm.nih.gov/genomes/all/GCA/000/918/275/GCA_000918275.1_ViralProj248534								ftp://ftp.ncbi.nlm.nih.gov/genomes/all/GCF/002/022/105/GCF_002022105.1_ASM202210v1
ftp://ftp.ncbi.nlm.nih.gov/genomes/all/GCA/000/920/875/GCA_000920875.1_ViralProj249088								ftp://ftp.ncbi.nlm.nih.gov/genomes/all/GCF/002/022/145/GCF_002022145.1_ASM202214v1
ftp://ftp.ncbi.nlm.nih.gov/genomes/all/GCA/001/041/395/GCA_001041395.1_ViralProj287962								ftp://ftp.ncbi.nlm.nih.gov/genomes/all/GCF/002/887/275/GCF_002887275.1_ASM288727v1
ftp://ftp.ncbi.nlm.nih.gov/genomes/all/GCA/000/921/795/GCA_000921795.1_ViralProj251391								ftp://ftp.ncbi.nlm.nih.gov/genomes/all/GCF/002/025/665/GCF_002025665.1_ASM202566v1
ftp://ftp.ncbi.nlm.nih.gov/genomes/all/GCA/000/923/015/GCA_000923015.1_ViralProj253328								ftp://ftp.ncbi.nlm.nih.gov/genomes/all/GCF/002/208/925/GCF_002208925.1_ASM220892v1
ftp://ftp.ncbi.nlm.nih.gov/genomes/all/GCA/002/673/555/GCA_002673555.1_ASM267355v1								ftp://ftp.ncbi.nlm.nih.gov/genomes/all/GCF/002/591/275/GCF_002591275.1_ASM259127v1
ftp://ftp.ncbi.nlm.nih.gov/genomes/all/GCA/002/669/635/GCA_002669635.1_ASM266963v1								ftp://ftp.ncbi.nlm.nih.gov/genomes/all/GCF/000/524/575/GCF_000524575.1_ASM52457v1
ftp://ftp.ncbi.nlm.nih.gov/genomes/all/GCA/002/669/655/GCA_002669655.1_ASM266965v1								ftp://ftp.ncbi.nlm.nih.gov/genomes/all/GCF/000/833/165/GCF_000833165.1_ASM83316v1
ftp://ftp.ncbi.nlm.nih.gov/genomes/all/GCA/002/669/675/GCA_002669675.1_ASM266967v1								ftp://ftp.ncbi.nlm.nih.gov/genomes/all/GCF/000/833/235/GCF_000833235.1_ASM83323v1
ftp://ftp.ncbi.nlm.nih.gov/genomes/all/GCA/000/920/775/GCA_000920775.1_ViralProj248461								ftp://ftp.ncbi.nlm.nih.gov/genomes/all/GCF/000/833/335/GCF_000833335.1_ASM83333v1
ftp://ftp.ncbi.nlm.nih.gov/genomes/all/GCA/000/920/835/GCA_000920835.1_ViralProj248631								ftp://ftp.ncbi.nlm.nih.gov/genomes/all/GCF/000/833/355/GCF_000833355.1_ASM83335v1
ftp://ftp.ncbi.nlm.nih.gov/genomes/all/GCA/000/920/855/GCA_000920855.1_ViralProj248635								ftp://ftp.ncbi.nlm.nih.gov/genomes/all/GCF/000/833/375/GCF_000833375.1_ASM83337v1
ftp://ftp.ncbi.nlm.nih.gov/genomes/all/GCA/000/919/995/GCA_000919995.1_ViralProj248633								ftp://ftp.ncbi.nlm.nih.gov/genomes/all/GCF/000/833/475/GCF_000833475.1_ASM83347v1
ftp://ftp.ncbi.nlm.nih.gov/genomes/all/GCA/000/922/755/GCA_000922755.1_ViralProj248630								ftp://ftp.ncbi.nlm.nih.gov/genomes/all/GCF/000/833/495/GCF_000833495.1_ASM83349v1
ftp://ftp.ncbi.nlm.nih.gov/genomes/all/GCA/000/918/255/GCA_000918255.1_ViralProj248462								ftp://ftp.ncbi.nlm.nih.gov/genomes/all/GCF/000/833/515/GCF_000833515.1_ASM83351v1
ftp://ftp.ncbi.nlm.nih.gov/genomes/all/GCA/000/918/355/GCA_000918355.1_ViralProj249090								ftp://ftp.ncbi.nlm.nih.gov/genomes/all/GCF/000/833/535/GCF_000833535.1_ASM83353v1
ftp://ftp.ncbi.nlm.nih.gov/genomes/all/GCA/000/919/975/GCA_000919975.1_ViralProj248629								ftp://ftp.ncbi.nlm.nih.gov/genomes/all/GCF/000/834/965/GCF_000834965.1_ASM83496v1
ftp://ftp.ncbi.nlm.nih.gov/genomes/all/GCA/002/756/095/GCA_002756095.1_ASM275609v1								ftp://ftp.ncbi.nlm.nih.gov/genomes/all/GCF/000/978/785/GCF_000978785.2_ASM97878v2
ftp://ftp.ncbi.nlm.nih.gov/genomes/all/GCA/002/599/625/GCA_002599625.1_ASM259962v1								ftp://ftp.ncbi.nlm.nih.gov/genomes/all/GCF/001/011/135/GCF_001011135.1_ASM101113v1
ftp://ftp.ncbi.nlm.nih.gov/genomes/all/GCA/002/599/645/GCA_002599645.1_ASM259964v1								ftp://ftp.ncbi.nlm.nih.gov/genomes/all/GCF/001/262/115/GCF_001262115.1_ASM126211v1
ftp://ftp.ncbi.nlm.nih.gov/genomes/all/GCA/002/599/665/GCA_002599665.1_ASM259966v1								ftp://ftp.ncbi.nlm.nih.gov/genomes/all/GCF/001/267/475/GCF_001267475.1_ASM126747v1
ftp://ftp.ncbi.nlm.nih.gov/genomes/all/GCA/002/756/115/GCA_002756115.1_ASM275611v1								ftp://ftp.ncbi.nlm.nih.gov/genomes/all/GCF/001/729/565/GCF_001729565.1_ASM172956v1
ftp://ftp.ncbi.nlm.nih.gov/genomes/all/GCA/002/659/915/GCA_002659915.1_ASM265991v1								ftp://ftp.ncbi.nlm.nih.gov/genomes/all/GCF/001/729/585/GCF_001729585.1_ASM172958v1
ftp://ftp.ncbi.nlm.nih.gov/genomes/all/GCA/002/669/055/GCA_002669055.1_ASM266905v1								ftp://ftp.ncbi.nlm.nih.gov/genomes/all/GCF/001/729/605/GCF_001729605.1_ASM172960v1
ftp://ftp.ncbi.nlm.nih.gov/genomes/all/GCA/002/670/835/GCA_002670835.1_ASM267083v1								ftp://ftp.ncbi.nlm.nih.gov/genomes/all/GCF/001/865/695/GCF_001865695.1_ASM186569v1
ftp://ftp.ncbi.nlm.nih.gov/genomes/all/GCA/002/670/855/GCA_002670855.1_ASM267085v1								ftp://ftp.ncbi.nlm.nih.gov/genomes/all/GCF/001/880/205/GCF_001880205.1_ASM188020v1
ftp://ftp.ncbi.nlm.nih.gov/genomes/all/GCA/000/919/935/GCA_000919935.1_ViralProj248531								ftp://ftp.ncbi.nlm.nih.gov/genomes/all/GCF/001/880/245/GCF_001880245.1_ASM188024v1
ftp://ftp.ncbi.nlm.nih.gov/genomes/all/GCA/000/920/795/GCA_000920795.1_ViralProj248533								ftp://ftp.ncbi.nlm.nih.gov/genomes/all/GCF/002/886/065/GCF_002886065.1_ASM288606v1
ftp://ftp.ncbi.nlm.nih.gov/genomes/all/GCA/002/667/495/GCA_002667495.1_ASM266749v1								ftp://ftp.ncbi.nlm.nih.gov/genomes/all/GCF/001/399/775/GCF_001399775.1_ASM139977v1
ftp://ftp.ncbi.nlm.nih.gov/genomes/all/GCA/000/919/955/GCA_000919955.1_ViralProj248625								ftp://ftp.ncbi.nlm.nih.gov/genomes/all/GCF/002/355/995/GCF_002355995.1_ASM235599v1
ftp://ftp.ncbi.nlm.nih.gov/genomes/all/GCA/000/920/895/GCA_000920895.1_ViralProj249093								ftp://ftp.ncbi.nlm.nih.gov/genomes/all/GCF/000/093/145/GCF_000093145.3_ASM9314v2
ftp://ftp.ncbi.nlm.nih.gov/genomes/all/GCA/000/920/935/GCA_000920935.1_ViralProj249094								ftp://ftp.ncbi.nlm.nih.gov/genomes/all/GCF/000/739/375/GCF_000739375.1_ASM73937v1
ftp://ftp.ncbi.nlm.nih.gov/genomes/all/GCA/000/920/055/GCA_000920055.1_ViralProj249095								ftp://ftp.ncbi.nlm.nih.gov/genomes/all/GCF/001/406/795/GCF_001406795.1_Comamonas_testosteroni_P19
ftp://ftp.ncbi.nlm.nih.gov/genomes/all/GCA/000/922/815/GCA_000922815.1_ViralProj249092								ftp://ftp.ncbi.nlm.nih.gov/genomes/all/GCF/000/271/985/GCF_000271985.2_ASM27198v2
ftp://ftp.ncbi.nlm.nih.gov/genomes/all/GCA/000/922/835/GCA_000922835.1_ViralProj249096								ftp://ftp.ncbi.nlm.nih.gov/genomes/all/GCF/000/473/745/GCF_000473745.2_ASM47374v3
ftp://ftp.ncbi.nlm.nih.gov/genomes/all/GCA/000/918/215/GCA_000918215.1_ViralProj248100								ftp://ftp.ncbi.nlm.nih.gov/genomes/all/GCF/000/496/455/GCF_000496455.2_ASM49645v2
ftp://ftp.ncbi.nlm.nih.gov/genomes/all/GCA/000/922/675/GCA_000922675.1_ViralProj248102								ftp://ftp.ncbi.nlm.nih.gov/genomes/all/GCF/000/496/605/GCF_000496605.2_ASM49660v2
ftp://ftp.ncbi.nlm.nih.gov/genomes/all/GCA/002/593/005/GCA_002593005.1_ASM259300v1								ftp://ftp.ncbi.nlm.nih.gov/genomes/all/GCF/000/524/595/GCF_000524595.1_ASM52459v1
ftp://ftp.ncbi.nlm.nih.gov/genomes/all/GCA/002/634/775/GCA_002634775.1_ASM263477v1								ftp://ftp.ncbi.nlm.nih.gov/genomes/all/GCF/000/568/855/GCF_000568855.2_ASM56885v2
ftp://ftp.ncbi.nlm.nih.gov/genomes/all/GCA/002/634/795/GCA_002634795.1_ASM263479v1								ftp://ftp.ncbi.nlm.nih.gov/genomes/all/GCF/000/816/985/GCF_000816985.1_ASM81698v1
ftp://ftp.ncbi.nlm.nih.gov/genomes/all/GCA/002/634/815/GCA_002634815.1_ASM263481v1								ftp://ftp.ncbi.nlm.nih.gov/genomes/all/GCF/000/829/255/GCF_000829255.1_ASM82925v1
ftp://ftp.ncbi.nlm.nih.gov/genomes/all/GCA/002/634/855/GCA_002634855.1_ASM263485v1								ftp://ftp.ncbi.nlm.nih.gov/genomes/all/GCF/000/829/275/GCF_000829275.1_ASM82927v1
ftp://ftp.ncbi.nlm.nih.gov/genomes/all/GCA/002/634/875/GCA_002634875.1_ASM263487v1								ftp://ftp.ncbi.nlm.nih.gov/genomes/all/GCF/000/829/885/GCF_000829885.1_ASM82988v1
ftp://ftp.ncbi.nlm.nih.gov/genomes/all/GCA/002/634/905/GCA_002634905.1_ASM263490v1								ftp://ftp.ncbi.nlm.nih.gov/genomes/all/GCF/000/981/825/GCF_000981825.1_ASM98182v1
ftp://ftp.ncbi.nlm.nih.gov/genomes/all/GCA/002/634/975/GCA_002634975.1_ASM263497v1								ftp://ftp.ncbi.nlm.nih.gov/genomes/all/GCF/001/045/685/GCF_001045685.1_ASM104568v1
ftp://ftp.ncbi.nlm.nih.gov/genomes/all/GCA/002/634/995/GCA_002634995.1_ASM263499v1								ftp://ftp.ncbi.nlm.nih.gov/genomes/all/GCF/001/077/475/GCF_001077475.1_ASM107747v1
ftp://ftp.ncbi.nlm.nih.gov/genomes/all/GCA/002/636/155/GCA_002636155.1_ASM263615v1								ftp://ftp.ncbi.nlm.nih.gov/genomes/all/GCF/001/293/085/GCF_001293085.1_ASM129308v1
ftp://ftp.ncbi.nlm.nih.gov/genomes/all/GCA/002/636/255/GCA_002636255.1_ASM263625v1								ftp://ftp.ncbi.nlm.nih.gov/genomes/all/GCF/001/447/845/GCF_001447845.1_ASM144784v1
ftp://ftp.ncbi.nlm.nih.gov/genomes/all/GCA/002/636/275/GCA_002636275.1_ASM263627v1								ftp://ftp.ncbi.nlm.nih.gov/genomes/all/GCF/001/457/615/GCF_001457615.1_NCTC10332
ftp://ftp.ncbi.nlm.nih.gov/genomes/all/GCA/002/636/295/GCA_002636295.1_ASM263629v1								ftp://ftp.ncbi.nlm.nih.gov/genomes/all/GCF/001/482/325/GCF_001482325.1_ASM148232v1
ftp://ftp.ncbi.nlm.nih.gov/genomes/all/GCA/002/636/335/GCA_002636335.1_ASM263633v1								ftp://ftp.ncbi.nlm.nih.gov/genomes/all/GCF/001/515/845/GCF_001515845.2_ASM151584v2
ftp://ftp.ncbi.nlm.nih.gov/genomes/all/GCA/002/636/385/GCA_002636385.1_ASM263638v1								ftp://ftp.ncbi.nlm.nih.gov/genomes/all/GCF/001/515/915/GCF_001515915.2_ASM151591v2
ftp://ftp.ncbi.nlm.nih.gov/genomes/all/GCA/002/636/435/GCA_002636435.1_ASM263643v1								ftp://ftp.ncbi.nlm.nih.gov/genomes/all/GCF/001/516/005/GCF_001516005.1_ASM151600v1
ftp://ftp.ncbi.nlm.nih.gov/genomes/all/GCA/002/645/835/GCA_002645835.1_ASM264583v1								ftp://ftp.ncbi.nlm.nih.gov/genomes/all/GCF/001/516/105/GCF_001516105.1_ASM151610v1
ftp://ftp.ncbi.nlm.nih.gov/genomes/all/GCA/002/645/875/GCA_002645875.1_ASM264587v1								ftp://ftp.ncbi.nlm.nih.gov/genomes/all/GCF/001/516/165/GCF_001516165.2_ASM151616v2
ftp://ftp.ncbi.nlm.nih.gov/genomes/all/GCA/002/645/895/GCA_002645895.1_ASM264589v1								ftp://ftp.ncbi.nlm.nih.gov/genomes/all/GCF/001/516/185/GCF_001516185.2_ASM151618v2
ftp://ftp.ncbi.nlm.nih.gov/genomes/all/GCA/002/645/995/GCA_002645995.1_ASM264599v1								ftp://ftp.ncbi.nlm.nih.gov/genomes/all/GCF/001/516/205/GCF_001516205.2_ASM151620v2
ftp://ftp.ncbi.nlm.nih.gov/genomes/all/GCA/002/646/015/GCA_002646015.1_ASM264601v1								ftp://ftp.ncbi.nlm.nih.gov/genomes/all/GCF/001/516/225/GCF_001516225.2_ASM151622v2
ftp://ftp.ncbi.nlm.nih.gov/genomes/all/GCA/002/646/035/GCA_002646035.1_ASM264603v1								ftp://ftp.ncbi.nlm.nih.gov/genomes/all/GCF/001/516/245/GCF_001516245.2_ASM151624v2
ftp://ftp.ncbi.nlm.nih.gov/genomes/all/GCA/002/646/075/GCA_002646075.1_ASM264607v1								ftp://ftp.ncbi.nlm.nih.gov/genomes/all/GCF/001/516/265/GCF_001516265.1_ASM151626v1
ftp://ftp.ncbi.nlm.nih.gov/genomes/all/GCA/002/646/155/GCA_002646155.1_ASM264615v1								ftp://ftp.ncbi.nlm.nih.gov/genomes/all/GCF/001/516/305/GCF_001516305.2_ASM151630v2
ftp://ftp.ncbi.nlm.nih.gov/genomes/all/GCA/002/646/215/GCA_002646215.1_ASM264621v1								ftp://ftp.ncbi.nlm.nih.gov/genomes/all/GCF/001/516/325/GCF_001516325.2_ASM151632v2
ftp://ftp.ncbi.nlm.nih.gov/genomes/all/GCA/002/646/275/GCA_002646275.1_ASM264627v1								ftp://ftp.ncbi.nlm.nih.gov/genomes/all/GCF/001/516/345/GCF_001516345.1_ASM151634v1
ftp://ftp.ncbi.nlm.nih.gov/genomes/all/GCA/002/646/295/GCA_002646295.1_ASM264629v1								ftp://ftp.ncbi.nlm.nih.gov/genomes/all/GCF/001/516/365/GCF_001516365.2_ASM151636v2
ftp://ftp.ncbi.nlm.nih.gov/genomes/all/GCA/002/646/975/GCA_002646975.1_ASM264697v1								ftp://ftp.ncbi.nlm.nih.gov/genomes/all/GCF/001/516/385/GCF_001516385.1_ASM151638v1
ftp://ftp.ncbi.nlm.nih.gov/genomes/all/GCA/002/647/015/GCA_002647015.1_ASM264701v1								ftp://ftp.ncbi.nlm.nih.gov/genomes/all/GCF/001/518/975/GCF_001518975.1_ASM151897v1
ftp://ftp.ncbi.nlm.nih.gov/genomes/all/GCA/002/647/055/GCA_002647055.1_ASM264705v1								ftp://ftp.ncbi.nlm.nih.gov/genomes/all/GCF/001/542/795/GCF_001542795.2_ASM154279v2
ftp://ftp.ncbi.nlm.nih.gov/genomes/all/GCA/002/647/095/GCA_002647095.1_ASM264709v1								ftp://ftp.ncbi.nlm.nih.gov/genomes/all/GCF/001/542/835/GCF_001542835.1_ASM154283v1
ftp://ftp.ncbi.nlm.nih.gov/genomes/all/GCA/002/647/135/GCA_002647135.1_ASM264713v1								ftp://ftp.ncbi.nlm.nih.gov/genomes/all/GCF/001/547/955/GCF_001547955.1_ASM154795v1
ftp://ftp.ncbi.nlm.nih.gov/genomes/all/GCA/002/655/435/GCA_002655435.1_ASM265543v1								ftp://ftp.ncbi.nlm.nih.gov/genomes/all/GCF/001/548/135/GCF_001548135.1_ASM154813v1
ftp://ftp.ncbi.nlm.nih.gov/genomes/all/GCA/002/655/455/GCA_002655455.1_ASM265545v1								ftp://ftp.ncbi.nlm.nih.gov/genomes/all/GCF/001/548/335/GCF_001548335.1_ASM154833v1
ftp://ftp.ncbi.nlm.nih.gov/genomes/all/GCA/002/655/475/GCA_002655475.1_ASM265547v1								ftp://ftp.ncbi.nlm.nih.gov/genomes/all/GCF/001/594/325/GCF_001594325.2_ASM159432v2
ftp://ftp.ncbi.nlm.nih.gov/genomes/all/GCA/002/655/575/GCA_002655575.1_ASM265557v1								ftp://ftp.ncbi.nlm.nih.gov/genomes/all/GCF/001/606/045/GCF_001606045.1_ASM160604v1
ftp://ftp.ncbi.nlm.nih.gov/genomes/all/GCA/002/655/635/GCA_002655635.1_ASM265563v1								ftp://ftp.ncbi.nlm.nih.gov/genomes/all/GCF/001/618/925/GCF_001618925.1_ASM161892v1
ftp://ftp.ncbi.nlm.nih.gov/genomes/all/GCA/002/655/675/GCA_002655675.1_ASM265567v1								ftp://ftp.ncbi.nlm.nih.gov/genomes/all/GCF/001/632/245/GCF_001632245.1_ASM163224v1
ftp://ftp.ncbi.nlm.nih.gov/genomes/all/GCA/002/655/695/GCA_002655695.1_ASM265569v1								ftp://ftp.ncbi.nlm.nih.gov/genomes/all/GCF/001/679/685/GCF_001679685.1_ASM167968v1
ftp://ftp.ncbi.nlm.nih.gov/genomes/all/GCA/002/655/855/GCA_002655855.1_ASM265585v1								ftp://ftp.ncbi.nlm.nih.gov/genomes/all/GCF/001/721/745/GCF_001721745.1_ASM172174v1
ftp://ftp.ncbi.nlm.nih.gov/genomes/all/GCA/002/655/935/GCA_002655935.1_ASM265593v1								ftp://ftp.ncbi.nlm.nih.gov/genomes/all/GCF/001/721/765/GCF_001721765.1_ASM172176v1
ftp://ftp.ncbi.nlm.nih.gov/genomes/all/GCA/002/656/235/GCA_002656235.1_ASM265623v1								ftp://ftp.ncbi.nlm.nih.gov/genomes/all/GCF/001/721/785/GCF_001721785.1_ASM172178v1
ftp://ftp.ncbi.nlm.nih.gov/genomes/all/GCA/002/656/255/GCA_002656255.1_ASM265625v1								ftp://ftp.ncbi.nlm.nih.gov/genomes/all/GCF/001/721/805/GCF_001721805.1_ASM172180v1
ftp://ftp.ncbi.nlm.nih.gov/genomes/all/GCA/002/656/475/GCA_002656475.1_ASM265647v1								ftp://ftp.ncbi.nlm.nih.gov/genomes/all/GCF/001/721/825/GCF_001721825.1_ASM172182v1
ftp://ftp.ncbi.nlm.nih.gov/genomes/all/GCA/002/656/515/GCA_002656515.1_ASM265651v1								ftp://ftp.ncbi.nlm.nih.gov/genomes/all/GCF/001/721/845/GCF_001721845.1_ASM172184v1
ftp://ftp.ncbi.nlm.nih.gov/genomes/all/GCA/002/656/535/GCA_002656535.1_ASM265653v1								ftp://ftp.ncbi.nlm.nih.gov/genomes/all/GCF/001/722/005/GCF_001722005.2_ASM172200v2
ftp://ftp.ncbi.nlm.nih.gov/genomes/all/GCA/002/656/575/GCA_002656575.1_ASM265657v1								ftp://ftp.ncbi.nlm.nih.gov/genomes/all/GCF/001/722/025/GCF_001722025.1_ASM172202v1
ftp://ftp.ncbi.nlm.nih.gov/genomes/all/GCA/002/656/595/GCA_002656595.1_ASM265659v1								ftp://ftp.ncbi.nlm.nih.gov/genomes/all/GCF/001/722/045/GCF_001722045.1_ASM172204v1
ftp://ftp.ncbi.nlm.nih.gov/genomes/all/GCA/002/656/655/GCA_002656655.1_ASM265665v1								ftp://ftp.ncbi.nlm.nih.gov/genomes/all/GCF/001/729/505/GCF_001729505.1_ASM172950v1
ftp://ftp.ncbi.nlm.nih.gov/genomes/all/GCA/002/656/795/GCA_002656795.1_ASM265679v1								ftp://ftp.ncbi.nlm.nih.gov/genomes/all/GCF/001/750/705/GCF_001750705.1_ASM175070v1
ftp://ftp.ncbi.nlm.nih.gov/genomes/all/GCA/002/656/815/GCA_002656815.1_ASM265681v1								ftp://ftp.ncbi.nlm.nih.gov/genomes/all/GCF/001/792/835/GCF_001792835.1_ASM179283v1
ftp://ftp.ncbi.nlm.nih.gov/genomes/all/GCA/002/656/915/GCA_002656915.1_ASM265691v1								ftp://ftp.ncbi.nlm.nih.gov/genomes/all/GCF/001/792/855/GCF_001792855.1_ASM179285v1
ftp://ftp.ncbi.nlm.nih.gov/genomes/all/GCA/002/656/935/GCA_002656935.1_ASM265693v1								ftp://ftp.ncbi.nlm.nih.gov/genomes/all/GCF/001/792/875/GCF_001792875.1_ASM179287v1
ftp://ftp.ncbi.nlm.nih.gov/genomes/all/GCA/002/656/995/GCA_002656995.1_ASM265699v1								ftp://ftp.ncbi.nlm.nih.gov/genomes/all/GCF/001/870/265/GCF_001870265.1_ASM187026v1
ftp://ftp.ncbi.nlm.nih.gov/genomes/all/GCA/002/657/035/GCA_002657035.1_ASM265703v1								ftp://ftp.ncbi.nlm.nih.gov/genomes/all/GCF/001/874/465/GCF_001874465.1_ASM187446v1
ftp://ftp.ncbi.nlm.nih.gov/genomes/all/GCA/002/657/295/GCA_002657295.1_ASM265729v1								ftp://ftp.ncbi.nlm.nih.gov/genomes/all/GCF/001/879/525/GCF_001879525.1_ASM187952v1
ftp://ftp.ncbi.nlm.nih.gov/genomes/all/GCA/002/657/355/GCA_002657355.1_ASM265735v1								ftp://ftp.ncbi.nlm.nih.gov/genomes/all/GCF/001/900/195/GCF_001900195.1_ASM190019v1
ftp://ftp.ncbi.nlm.nih.gov/genomes/all/GCA/002/657/375/GCA_002657375.1_ASM265737v1								ftp://ftp.ncbi.nlm.nih.gov/genomes/all/GCF/001/900/225/GCF_001900225.1_ASM190022v1
ftp://ftp.ncbi.nlm.nih.gov/genomes/all/GCA/002/657/395/GCA_002657395.1_ASM265739v1								ftp://ftp.ncbi.nlm.nih.gov/genomes/all/GCF/001/900/265/GCF_001900265.1_ASM190026v1
ftp://ftp.ncbi.nlm.nih.gov/genomes/all/GCA/002/657/415/GCA_002657415.1_ASM265741v1								ftp://ftp.ncbi.nlm.nih.gov/genomes/all/GCF/002/075/065/GCF_002075065.1_ASM207506v1
ftp://ftp.ncbi.nlm.nih.gov/genomes/all/GCA/002/657/455/GCA_002657455.1_ASM265745v1								ftp://ftp.ncbi.nlm.nih.gov/genomes/all/GCF/002/085/605/GCF_002085605.1_ASM208560v1
ftp://ftp.ncbi.nlm.nih.gov/genomes/all/GCA/002/657/495/GCA_002657495.1_ASM265749v1								ftp://ftp.ncbi.nlm.nih.gov/genomes/all/GCF/002/085/755/GCF_002085755.1_ASM208575v1
ftp://ftp.ncbi.nlm.nih.gov/genomes/all/GCA/002/657/515/GCA_002657515.1_ASM265751v1								ftp://ftp.ncbi.nlm.nih.gov/genomes/all/GCF/002/104/595/GCF_002104595.1_ASM210459v1
ftp://ftp.ncbi.nlm.nih.gov/genomes/all/GCA/002/657/555/GCA_002657555.1_ASM265755v1								ftp://ftp.ncbi.nlm.nih.gov/genomes/all/GCF/002/104/615/GCF_002104615.1_ASM210461v1
ftp://ftp.ncbi.nlm.nih.gov/genomes/all/GCA/002/657/695/GCA_002657695.1_ASM265769v1								ftp://ftp.ncbi.nlm.nih.gov/genomes/all/GCF/002/192/475/GCF_002192475.1_ASM219247v1
ftp://ftp.ncbi.nlm.nih.gov/genomes/all/GCA/002/657/835/GCA_002657835.1_ASM265783v1								ftp://ftp.ncbi.nlm.nih.gov/genomes/all/GCF/002/192/495/GCF_002192495.1_ASM219249v1
ftp://ftp.ncbi.nlm.nih.gov/genomes/all/GCA/002/657/875/GCA_002657875.1_ASM265787v1								ftp://ftp.ncbi.nlm.nih.gov/genomes/all/GCF/002/205/335/GCF_002205335.1_ASM220533v1
ftp://ftp.ncbi.nlm.nih.gov/genomes/all/GCA/002/657/915/GCA_002657915.1_ASM265791v1								ftp://ftp.ncbi.nlm.nih.gov/genomes/all/GCF/002/205/355/GCF_002205355.1_ASM220535v1
ftp://ftp.ncbi.nlm.nih.gov/genomes/all/GCA/002/657/935/GCA_002657935.1_ASM265793v1								ftp://ftp.ncbi.nlm.nih.gov/genomes/all/GCF/002/205/375/GCF_002205375.1_ASM220537v1
ftp://ftp.ncbi.nlm.nih.gov/genomes/all/GCA/002/657/995/GCA_002657995.1_ASM265799v1								ftp://ftp.ncbi.nlm.nih.gov/genomes/all/GCF/002/208/645/GCF_002208645.1_ASM220864v1
ftp://ftp.ncbi.nlm.nih.gov/genomes/all/GCA/002/658/035/GCA_002658035.1_ASM265803v1								ftp://ftp.ncbi.nlm.nih.gov/genomes/all/GCF/002/215/345/GCF_002215345.1_ASM221534v1
ftp://ftp.ncbi.nlm.nih.gov/genomes/all/GCA/002/658/075/GCA_002658075.1_ASM265807v1								ftp://ftp.ncbi.nlm.nih.gov/genomes/all/GCF/002/223/805/GCF_002223805.1_ASM222380v1
ftp://ftp.ncbi.nlm.nih.gov/genomes/all/GCA/002/658/115/GCA_002658115.1_ASM265811v1								ftp://ftp.ncbi.nlm.nih.gov/genomes/all/GCF/002/237/405/GCF_002237405.1_ASM223740v1
ftp://ftp.ncbi.nlm.nih.gov/genomes/all/GCA/002/658/135/GCA_002658135.1_ASM265813v1								ftp://ftp.ncbi.nlm.nih.gov/genomes/all/GCF/002/237/425/GCF_002237425.1_ASM223742v1
ftp://ftp.ncbi.nlm.nih.gov/genomes/all/GCA/002/658/215/GCA_002658215.1_ASM265821v1								ftp://ftp.ncbi.nlm.nih.gov/genomes/all/GCF/002/442/855/GCF_002442855.1_ASM244285v1
ftp://ftp.ncbi.nlm.nih.gov/genomes/all/GCA/002/658/255/GCA_002658255.1_ASM265825v1								ftp://ftp.ncbi.nlm.nih.gov/genomes/all/GCF/002/753/655/GCF_002753655.1_ASM275365v1
ftp://ftp.ncbi.nlm.nih.gov/genomes/all/GCA/002/658/295/GCA_002658295.1_ASM265829v1								ftp://ftp.ncbi.nlm.nih.gov/genomes/all/GCF/002/812/825/GCF_002812825.1_ASM281282v1
ftp://ftp.ncbi.nlm.nih.gov/genomes/all/GCA/002/658/315/GCA_002658315.1_ASM265831v1								ftp://ftp.ncbi.nlm.nih.gov/genomes/all/GCF/002/812/845/GCF_002812845.1_ASM281284v1
ftp://ftp.ncbi.nlm.nih.gov/genomes/all/GCA/002/658/375/GCA_002658375.1_ASM265837v1								ftp://ftp.ncbi.nlm.nih.gov/genomes/all/GCF/002/812/865/GCF_002812865.1_ASM281286v1
ftp://ftp.ncbi.nlm.nih.gov/genomes/all/GCA/002/658/395/GCA_002658395.1_ASM265839v1								ftp://ftp.ncbi.nlm.nih.gov/genomes/all/GCF/002/812/885/GCF_002812885.1_ASM281288v1
ftp://ftp.ncbi.nlm.nih.gov/genomes/all/GCA/002/658/435/GCA_002658435.1_ASM265843v1								ftp://ftp.ncbi.nlm.nih.gov/genomes/all/GCF/002/812/905/GCF_002812905.1_ASM281290v1
ftp://ftp.ncbi.nlm.nih.gov/genomes/all/GCA/002/658/575/GCA_002658575.1_ASM265857v1								ftp://ftp.ncbi.nlm.nih.gov/genomes/all/GCF/002/812/925/GCF_002812925.1_ASM281292v1
ftp://ftp.ncbi.nlm.nih.gov/genomes/all/GCA/002/658/595/GCA_002658595.1_ASM265859v1								ftp://ftp.ncbi.nlm.nih.gov/genomes/all/GCF/900/069/025/GCF_900069025.1_ASM90006902v1
ftp://ftp.ncbi.nlm.nih.gov/genomes/all/GCA/002/658/655/GCA_002658655.1_ASM265865v1								ftp://ftp.ncbi.nlm.nih.gov/genomes/all/GCF/900/070/375/GCF_900070375.1_PAO1OR
ftp://ftp.ncbi.nlm.nih.gov/genomes/all/GCA/002/658/715/GCA_002658715.1_ASM265871v1								ftp://ftp.ncbi.nlm.nih.gov/genomes/all/GCF/900/095/805/GCF_900095805.1_PA14Or
ftp://ftp.ncbi.nlm.nih.gov/genomes/all/GCA/002/658/775/GCA_002658775.1_ASM265877v1								ftp://ftp.ncbi.nlm.nih.gov/genomes/all/GCF/900/149/285/GCF_900149285.1_PcyII-10
ftp://ftp.ncbi.nlm.nih.gov/genomes/all/GCA/002/658/815/GCA_002658815.1_ASM265881v1								ftp://ftp.ncbi.nlm.nih.gov/genomes/all/GCF/900/185/255/GCF_900185255.1_NN2
ftp://ftp.ncbi.nlm.nih.gov/genomes/all/GCA/002/658/875/GCA_002658875.1_ASM265887v1								ftp://ftp.ncbi.nlm.nih.gov/genomes/all/GCF/900/243/355/GCF_900243355.1_RW109
ftp://ftp.ncbi.nlm.nih.gov/genomes/all/GCA/002/658/935/GCA_002658935.1_ASM265893v1								ftp://ftp.ncbi.nlm.nih.gov/genomes/all/GCF/002/374/815/GCF_002374815.1_ASM237481v1
ftp://ftp.ncbi.nlm.nih.gov/genomes/all/GCA/002/659/115/GCA_002659115.1_ASM265911v1								ftp://ftp.ncbi.nlm.nih.gov/genomes/all/GCF/000/701/165/GCF_000701165.1_ASM70116v2
ftp://ftp.ncbi.nlm.nih.gov/genomes/all/GCA/002/660/155/GCA_002660155.1_ASM266015v1								ftp://ftp.ncbi.nlm.nih.gov/genomes/all/GCF/000/755/805/GCF_000755805.1_ASM75580v1
ftp://ftp.ncbi.nlm.nih.gov/genomes/all/GCA/002/667/675/GCA_002667675.1_ASM266767v1								ftp://ftp.ncbi.nlm.nih.gov/genomes/all/GCF/000/974/835/GCF_000974835.2_ASM97483v2
ftp://ftp.ncbi.nlm.nih.gov/genomes/all/GCA/002/675/915/GCA_002675915.1_ASM267591v1								ftp://ftp.ncbi.nlm.nih.gov/genomes/all/GCF/001/411/495/GCF_001411495.1_ASM141149v1
ftp://ftp.ncbi.nlm.nih.gov/genomes/all/GCA/002/682/695/GCA_002682695.1_ASM268269v1								ftp://ftp.ncbi.nlm.nih.gov/genomes/all/GCF/001/718/395/GCF_001718395.1_ASM171839v1
ftp://ftp.ncbi.nlm.nih.gov/genomes/all/GCA/002/682/715/GCA_002682715.1_ASM268271v1								ftp://ftp.ncbi.nlm.nih.gov/genomes/all/GCF/001/718/835/GCF_001718835.1_ASM171883v1
ftp://ftp.ncbi.nlm.nih.gov/genomes/all/GCA/001/736/955/GCA_001736955.1_ViralProj343492								ftp://ftp.ncbi.nlm.nih.gov/genomes/all/GCF/002/209/085/GCF_002209085.1_ASM220908v1
ftp://ftp.ncbi.nlm.nih.gov/genomes/all/GCA/002/641/235/GCA_002641235.1_ASM264123v1								ftp://ftp.ncbi.nlm.nih.gov/genomes/all/GCF/002/407/525/GCF_002407525.2_ASM240752v3
ftp://ftp.ncbi.nlm.nih.gov/genomes/all/GCA/000/921/055/GCA_000921055.1_ViralProj253222								ftp://ftp.ncbi.nlm.nih.gov/genomes/all/GCF/000/293/885/GCF_000293885.2_ASM29388v3
ftp://ftp.ncbi.nlm.nih.gov/genomes/all/GCA/000/921/095/GCA_000921095.1_ViralProj253322								ftp://ftp.ncbi.nlm.nih.gov/genomes/all/GCF/000/730/425/GCF_000730425.1_ASM73042v1
ftp://ftp.ncbi.nlm.nih.gov/genomes/all/GCA/000/921/935/GCA_000921935.1_ViralProj253323								ftp://ftp.ncbi.nlm.nih.gov/genomes/all/GCF/000/934/565/GCF_000934565.1_ASM93456v1
ftp://ftp.ncbi.nlm.nih.gov/genomes/all/GCA/000/921/955/GCA_000921955.1_ViralProj253327								ftp://ftp.ncbi.nlm.nih.gov/genomes/all/GCF/000/963/495/GCF_000963495.1_ASM96349v1
ftp://ftp.ncbi.nlm.nih.gov/genomes/all/GCA/000/922/975/GCA_000922975.1_ViralProj253320								ftp://ftp.ncbi.nlm.nih.gov/genomes/all/GCF/000/968/415/GCF_000968415.1_ASM96841v1
ftp://ftp.ncbi.nlm.nih.gov/genomes/all/GCA/000/923/655/GCA_000923655.1_ViralProj253329								ftp://ftp.ncbi.nlm.nih.gov/genomes/all/GCF/001/307/155/GCF_001307155.1_ASM130715v1
ftp://ftp.ncbi.nlm.nih.gov/genomes/all/GCA/002/604/605/GCA_002604605.1_ASM260460v1								ftp://ftp.ncbi.nlm.nih.gov/genomes/all/GCF/001/307/275/GCF_001307275.1_ASM130727v1
ftp://ftp.ncbi.nlm.nih.gov/genomes/all/GCA/002/635/015/GCA_002635015.1_ASM263501v1								ftp://ftp.ncbi.nlm.nih.gov/genomes/all/GCF/001/612/705/GCF_001612705.1_ASM161270v1
ftp://ftp.ncbi.nlm.nih.gov/genomes/all/GCA/002/635/035/GCA_002635035.1_ASM263503v1								ftp://ftp.ncbi.nlm.nih.gov/genomes/all/GCF/001/708/445/GCF_001708445.1_ASM170844v1
ftp://ftp.ncbi.nlm.nih.gov/genomes/all/GCA/002/635/055/GCA_002635055.1_ASM263505v1								ftp://ftp.ncbi.nlm.nih.gov/genomes/all/GCF/001/708/465/GCF_001708465.1_ASM170846v1
ftp://ftp.ncbi.nlm.nih.gov/genomes/all/GCA/002/635/075/GCA_002635075.1_ASM263507v1								ftp://ftp.ncbi.nlm.nih.gov/genomes/all/GCF/001/708/485/GCF_001708485.1_ASM170848v1
ftp://ftp.ncbi.nlm.nih.gov/genomes/all/GCA/002/642/755/GCA_002642755.1_ASM264275v1								ftp://ftp.ncbi.nlm.nih.gov/genomes/all/GCF/001/747/385/GCF_001747385.1_ASM174738v1
ftp://ftp.ncbi.nlm.nih.gov/genomes/all/GCA/002/643/775/GCA_002643775.1_ASM264377v1								ftp://ftp.ncbi.nlm.nih.gov/genomes/all/GCF/001/543/265/GCF_001543265.1_ASM154326v1
ftp://ftp.ncbi.nlm.nih.gov/genomes/all/GCA/002/647/155/GCA_002647155.1_ASM264715v1								ftp://ftp.ncbi.nlm.nih.gov/genomes/all/GCF/002/128/325/GCF_002128325.1_ASM212832v1
ftp://ftp.ncbi.nlm.nih.gov/genomes/all/GCA/002/647/175/GCA_002647175.1_ASM264717v1								ftp://ftp.ncbi.nlm.nih.gov/genomes/all/GCF/000/733/715/GCF_000733715.2_ASM73371v2
ftp://ftp.ncbi.nlm.nih.gov/genomes/all/GCA/002/655/535/GCA_002655535.1_ASM265553v1								ftp://ftp.ncbi.nlm.nih.gov/genomes/all/GCF/002/442/555/GCF_002442555.1_ASM244255v1
ftp://ftp.ncbi.nlm.nih.gov/genomes/all/GCA/002/655/615/GCA_002655615.1_ASM265561v1								ftp://ftp.ncbi.nlm.nih.gov/genomes/all/GCF/000/007/565/GCF_000007565.2_ASM756v2
ftp://ftp.ncbi.nlm.nih.gov/genomes/all/GCA/002/655/715/GCA_002655715.1_ASM265571v1								ftp://ftp.ncbi.nlm.nih.gov/genomes/all/GCF/000/226/035/GCF_000226035.2_ASM22603v3
ftp://ftp.ncbi.nlm.nih.gov/genomes/all/GCA/002/655/755/GCA_002655755.1_ASM265575v1								ftp://ftp.ncbi.nlm.nih.gov/genomes/all/GCF/000/271/965/GCF_000271965.2_ASM27196v2
ftp://ftp.ncbi.nlm.nih.gov/genomes/all/GCA/002/655/775/GCA_002655775.1_ASM265577v1								ftp://ftp.ncbi.nlm.nih.gov/genomes/all/GCF/000/495/455/GCF_000495455.2_ASM49545v2
ftp://ftp.ncbi.nlm.nih.gov/genomes/all/GCA/002/655/815/GCA_002655815.1_ASM265581v1								ftp://ftp.ncbi.nlm.nih.gov/genomes/all/GCF/000/498/395/GCF_000498395.2_ASM49839v3
ftp://ftp.ncbi.nlm.nih.gov/genomes/all/GCA/002/655/835/GCA_002655835.1_ASM265583v1								ftp://ftp.ncbi.nlm.nih.gov/genomes/all/GCF/000/691/565/GCF_000691565.1_ASM69156v1
ftp://ftp.ncbi.nlm.nih.gov/genomes/all/GCA/002/655/875/GCA_002655875.1_ASM265587v1								ftp://ftp.ncbi.nlm.nih.gov/genomes/all/GCF/001/515/585/GCF_001515585.1_ASM151558v2
ftp://ftp.ncbi.nlm.nih.gov/genomes/all/GCA/002/655/895/GCA_002655895.1_ASM265589v1								ftp://ftp.ncbi.nlm.nih.gov/genomes/all/GCF/001/636/055/GCF_001636055.1_ASM163605v1
ftp://ftp.ncbi.nlm.nih.gov/genomes/all/GCA/002/655/915/GCA_002655915.1_ASM265591v1								ftp://ftp.ncbi.nlm.nih.gov/genomes/all/GCF/001/767/335/GCF_001767335.1_ASM176733v1
ftp://ftp.ncbi.nlm.nih.gov/genomes/all/GCA/002/655/995/GCA_002655995.1_ASM265599v1								ftp://ftp.ncbi.nlm.nih.gov/genomes/all/GCF/001/886/975/GCF_001886975.1_ASM188697v1
ftp://ftp.ncbi.nlm.nih.gov/genomes/all/GCA/002/656/015/GCA_002656015.1_ASM265601v1								ftp://ftp.ncbi.nlm.nih.gov/genomes/all/GCF/002/025/705/GCF_002025705.1_ASM202570v1
ftp://ftp.ncbi.nlm.nih.gov/genomes/all/GCA/002/656/055/GCA_002656055.1_ASM265605v1								ftp://ftp.ncbi.nlm.nih.gov/genomes/all/GCF/002/356/095/GCF_002356095.1_ASM235609v1
ftp://ftp.ncbi.nlm.nih.gov/genomes/all/GCA/002/656/075/GCA_002656075.1_ASM265607v1								ftp://ftp.ncbi.nlm.nih.gov/genomes/all/GCF/002/736/045/GCF_002736045.1_ASM273604v1
ftp://ftp.ncbi.nlm.nih.gov/genomes/all/GCA/002/656/095/GCA_002656095.1_ASM265609v1								ftp://ftp.ncbi.nlm.nih.gov/genomes/all/GCF/002/736/125/GCF_002736125.1_ASM273612v1
ftp://ftp.ncbi.nlm.nih.gov/genomes/all/GCA/002/656/115/GCA_002656115.1_ASM265611v1								ftp://ftp.ncbi.nlm.nih.gov/genomes/all/GCF/002/741/075/GCF_002741075.1_IEC330191.0
ftp://ftp.ncbi.nlm.nih.gov/genomes/all/GCA/002/656/135/GCA_002656135.1_ASM265613v1								ftp://ftp.ncbi.nlm.nih.gov/genomes/all/GCF/001/299/555/GCF_001299555.1_ASM129955v1
ftp://ftp.ncbi.nlm.nih.gov/genomes/all/GCA/002/656/195/GCA_002656195.1_ASM265619v1								ftp://ftp.ncbi.nlm.nih.gov/genomes/all/GCF/001/586/135/GCF_001586135.1_ASM158613v1
ftp://ftp.ncbi.nlm.nih.gov/genomes/all/GCA/002/656/215/GCA_002656215.1_ASM265621v1								ftp://ftp.ncbi.nlm.nih.gov/genomes/all/GCF/001/587/135/GCF_001587135.1_ASM158713v1
ftp://ftp.ncbi.nlm.nih.gov/genomes/all/GCA/002/656/295/GCA_002656295.1_ASM265629v1								ftp://ftp.ncbi.nlm.nih.gov/genomes/all/GCF/001/587/155/GCF_001587155.1_ASM158715v1
ftp://ftp.ncbi.nlm.nih.gov/genomes/all/GCA/002/656/315/GCA_002656315.1_ASM265631v1								ftp://ftp.ncbi.nlm.nih.gov/genomes/all/GCF/001/663/415/GCF_001663415.1_ASM166341v1
ftp://ftp.ncbi.nlm.nih.gov/genomes/all/GCA/002/656/355/GCA_002656355.1_ASM265635v1								ftp://ftp.ncbi.nlm.nih.gov/genomes/all/GCF/001/708/525/GCF_001708525.1_ASM170852v1
ftp://ftp.ncbi.nlm.nih.gov/genomes/all/GCA/002/656/375/GCA_002656375.1_ASM265637v1								ftp://ftp.ncbi.nlm.nih.gov/genomes/all/GCF/001/879/565/GCF_001879565.1_ASM187956v1
ftp://ftp.ncbi.nlm.nih.gov/genomes/all/GCA/002/656/455/GCA_002656455.1_ASM265645v1								ftp://ftp.ncbi.nlm.nih.gov/genomes/all/GCF/001/887/535/GCF_001887535.1_ASM188753v1
ftp://ftp.ncbi.nlm.nih.gov/genomes/all/GCA/002/656/555/GCA_002656555.1_ASM265655v1								ftp://ftp.ncbi.nlm.nih.gov/genomes/all/GCF/001/891/105/GCF_001891105.1_ASM189110v1
ftp://ftp.ncbi.nlm.nih.gov/genomes/all/GCA/002/656/775/GCA_002656775.1_ASM265677v1								ftp://ftp.ncbi.nlm.nih.gov/genomes/all/GCF/002/155/245/GCF_002155245.1_ASM215524v1
ftp://ftp.ncbi.nlm.nih.gov/genomes/all/GCA/002/656/955/GCA_002656955.1_ASM265695v1								ftp://ftp.ncbi.nlm.nih.gov/genomes/all/GCF/002/162/015/GCF_002162015.1_ASM216201v1
ftp://ftp.ncbi.nlm.nih.gov/genomes/all/GCA/002/656/975/GCA_002656975.1_ASM265697v1								ftp://ftp.ncbi.nlm.nih.gov/genomes/all/GCF/002/220/465/GCF_002220465.1_ASM222046v1
ftp://ftp.ncbi.nlm.nih.gov/genomes/all/GCA/002/657/015/GCA_002657015.1_ASM265701v1								ftp://ftp.ncbi.nlm.nih.gov/genomes/all/GCF/002/501/565/GCF_002501565.1_ASM250156v1
ftp://ftp.ncbi.nlm.nih.gov/genomes/all/GCA/002/657/135/GCA_002657135.1_ASM265713v1								ftp://ftp.ncbi.nlm.nih.gov/genomes/all/GCF/002/549/815/GCF_002549815.1_ASM254981v1
ftp://ftp.ncbi.nlm.nih.gov/genomes/all/GCA/002/657/155/GCA_002657155.1_ASM265715v1								ftp://ftp.ncbi.nlm.nih.gov/genomes/all/GCF/002/894/285/GCF_002894285.1_ASM289428v1
ftp://ftp.ncbi.nlm.nih.gov/genomes/all/GCA/002/657/175/GCA_002657175.1_ASM265717v1								ftp://ftp.ncbi.nlm.nih.gov/genomes/all/GCF/000/590/475/GCF_000590475.1_ASM59047v1
ftp://ftp.ncbi.nlm.nih.gov/genomes/all/GCA/002/657/195/GCA_002657195.1_ASM265719v1								ftp://ftp.ncbi.nlm.nih.gov/genomes/all/GCF/000/661/915/GCF_000661915.1_ASM66191v1
ftp://ftp.ncbi.nlm.nih.gov/genomes/all/GCA/002/657/215/GCA_002657215.1_ASM265721v1								ftp://ftp.ncbi.nlm.nih.gov/genomes/all/GCF/001/038/645/GCF_001038645.1_ASM103864v1
ftp://ftp.ncbi.nlm.nih.gov/genomes/all/GCA/002/657/235/GCA_002657235.1_ASM265723v1								ftp://ftp.ncbi.nlm.nih.gov/genomes/all/GCF/001/648/195/GCF_001648195.1_ASM164819v1
ftp://ftp.ncbi.nlm.nih.gov/genomes/all/GCA/002/657/255/GCA_002657255.1_ASM265725v1								ftp://ftp.ncbi.nlm.nih.gov/genomes/all/GCF/000/344/335/GCF_000344335.2_ASM34433v2
ftp://ftp.ncbi.nlm.nih.gov/genomes/all/GCA/002/657/275/GCA_002657275.1_ASM265727v1								ftp://ftp.ncbi.nlm.nih.gov/genomes/all/GCF/000/344/355/GCF_000344355.2_ASM34435v2
ftp://ftp.ncbi.nlm.nih.gov/genomes/all/GCA/002/657/335/GCA_002657335.1_ASM265733v1								ftp://ftp.ncbi.nlm.nih.gov/genomes/all/GCF/000/452/705/GCF_000452705.1_ASM45270v3
ftp://ftp.ncbi.nlm.nih.gov/genomes/all/GCA/002/657/435/GCA_002657435.1_ASM265743v1								ftp://ftp.ncbi.nlm.nih.gov/genomes/all/GCF/000/648/735/GCF_000648735.3_ASM64873v3
ftp://ftp.ncbi.nlm.nih.gov/genomes/all/GCA/002/657/475/GCA_002657475.1_ASM265747v1								ftp://ftp.ncbi.nlm.nih.gov/genomes/all/GCF/000/988/395/GCF_000988395.1_ASM98839v1
ftp://ftp.ncbi.nlm.nih.gov/genomes/all/GCA/002/657/575/GCA_002657575.1_ASM265757v1								ftp://ftp.ncbi.nlm.nih.gov/genomes/all/GCF/000/988/485/GCF_000988485.1_ASM98848v1
ftp://ftp.ncbi.nlm.nih.gov/genomes/all/GCA/002/657/595/GCA_002657595.1_ASM265759v1								ftp://ftp.ncbi.nlm.nih.gov/genomes/all/GCF/001/281/365/GCF_001281365.1_ASM128136v1
ftp://ftp.ncbi.nlm.nih.gov/genomes/all/GCA/002/657/615/GCA_002657615.1_ASM265761v1								ftp://ftp.ncbi.nlm.nih.gov/genomes/all/GCF/001/482/725/GCF_001482725.1_ASM148272v1
ftp://ftp.ncbi.nlm.nih.gov/genomes/all/GCA/002/657/655/GCA_002657655.1_ASM265765v1								ftp://ftp.ncbi.nlm.nih.gov/genomes/all/GCF/001/913/215/GCF_001913215.1_ASM191321v1
ftp://ftp.ncbi.nlm.nih.gov/genomes/all/GCA/002/657/675/GCA_002657675.1_ASM265767v1								ftp://ftp.ncbi.nlm.nih.gov/genomes/all/GCF/001/913/235/GCF_001913235.1_ASM191323v1
ftp://ftp.ncbi.nlm.nih.gov/genomes/all/GCA/002/657/735/GCA_002657735.1_ASM265773v1								ftp://ftp.ncbi.nlm.nih.gov/genomes/all/GCF/002/024/285/GCF_002024285.1_ASM202428v1
ftp://ftp.ncbi.nlm.nih.gov/genomes/all/GCA/002/657/855/GCA_002657855.1_ASM265785v1								ftp://ftp.ncbi.nlm.nih.gov/genomes/all/GCF/002/024/305/GCF_002024305.1_ASM202430v1
ftp://ftp.ncbi.nlm.nih.gov/genomes/all/GCA/002/657/955/GCA_002657955.1_ASM265795v1								ftp://ftp.ncbi.nlm.nih.gov/genomes/all/GCF/002/763/655/GCF_002763655.1_ASM276365v1
ftp://ftp.ncbi.nlm.nih.gov/genomes/all/GCA/002/658/095/GCA_002658095.1_ASM265809v1								ftp://ftp.ncbi.nlm.nih.gov/genomes/all/GCF/002/393/485/GCF_002393485.1_ASM239348v1
ftp://ftp.ncbi.nlm.nih.gov/genomes/all/GCA/002/658/235/GCA_002658235.1_ASM265823v1								ftp://ftp.ncbi.nlm.nih.gov/genomes/all/GCF/000/297/075/GCF_000297075.2_Ppseudo_final
ftp://ftp.ncbi.nlm.nih.gov/genomes/all/GCA/002/658/335/GCA_002658335.1_ASM265833v1								ftp://ftp.ncbi.nlm.nih.gov/genomes/all/GCF/000/953/455/GCF_000953455.1_Ppseudo_Pac
ftp://ftp.ncbi.nlm.nih.gov/genomes/all/GCA/002/658/355/GCA_002658355.1_ASM265835v1								ftp://ftp.ncbi.nlm.nih.gov/genomes/all/GCF/002/355/475/GCF_002355475.1_ASM235547v1
ftp://ftp.ncbi.nlm.nih.gov/genomes/all/GCA/002/658/455/GCA_002658455.1_ASM265845v1								ftp://ftp.ncbi.nlm.nih.gov/genomes/all/GCF/000/835/205/GCF_000835205.1_ASM83520v1
ftp://ftp.ncbi.nlm.nih.gov/genomes/all/GCA/002/658/495/GCA_002658495.1_ASM265849v1								ftp://ftp.ncbi.nlm.nih.gov/genomes/all/GCF/000/960/995/GCF_000960995.1_ASM96099v1
ftp://ftp.ncbi.nlm.nih.gov/genomes/all/GCA/002/658/515/GCA_002658515.1_ASM265851v1								ftp://ftp.ncbi.nlm.nih.gov/genomes/all/GCF/000/972/745/GCF_000972745.1_ASM97274v1
ftp://ftp.ncbi.nlm.nih.gov/genomes/all/GCA/002/658/735/GCA_002658735.1_ASM265873v1								ftp://ftp.ncbi.nlm.nih.gov/genomes/all/GCF/001/186/415/GCF_001186415.1_ASM118641v1
ftp://ftp.ncbi.nlm.nih.gov/genomes/all/GCA/002/658/895/GCA_002658895.1_ASM265889v1								ftp://ftp.ncbi.nlm.nih.gov/genomes/all/GCF/001/186/465/GCF_001186465.1_ASM118646v1
ftp://ftp.ncbi.nlm.nih.gov/genomes/all/GCA/002/658/955/GCA_002658955.1_ASM265895v1								ftp://ftp.ncbi.nlm.nih.gov/genomes/all/GCF/002/776/775/GCF_002776775.1_ASM277677v1
ftp://ftp.ncbi.nlm.nih.gov/genomes/all/GCA/002/658/975/GCA_002658975.1_ASM265897v1								ftp://ftp.ncbi.nlm.nih.gov/genomes/all/GCF/002/776/835/GCF_002776835.1_ASM277683v1
ftp://ftp.ncbi.nlm.nih.gov/genomes/all/GCA/002/658/995/GCA_002658995.1_ASM265899v1								ftp://ftp.ncbi.nlm.nih.gov/genomes/all/GCF/002/879/955/GCF_002879955.1_ASM287995v1
ftp://ftp.ncbi.nlm.nih.gov/genomes/all/GCA/002/659/015/GCA_002659015.1_ASM265901v1								ftp://ftp.ncbi.nlm.nih.gov/genomes/all/GCF/001/021/935/GCF_001021935.1_ASM102193v1
ftp://ftp.ncbi.nlm.nih.gov/genomes/all/GCA/002/659/135/GCA_002659135.1_ASM265913v1								ftp://ftp.ncbi.nlm.nih.gov/genomes/all/GCF/900/094/325/GCF_900094325.1_PBasm1
ftp://ftp.ncbi.nlm.nih.gov/genomes/all/GCA/002/681/655/GCA_002681655.1_ASM268165v1								ftp://ftp.ncbi.nlm.nih.gov/genomes/all/GCF/000/816/885/GCF_000816885.1_ASM81688v1
ftp://ftp.ncbi.nlm.nih.gov/genomes/all/GCA/002/681/675/GCA_002681675.1_ASM268167v1								ftp://ftp.ncbi.nlm.nih.gov/genomes/all/GCF/000/961/155/GCF_000961155.1_ASM96115v1
ftp://ftp.ncbi.nlm.nih.gov/genomes/all/GCA/002/681/695/GCA_002681695.1_ASM268169v1								ftp://ftp.ncbi.nlm.nih.gov/genomes/all/GCF/000/961/175/GCF_000961175.1_ASM96117v1
ftp://ftp.ncbi.nlm.nih.gov/genomes/all/GCA/002/681/735/GCA_002681735.1_ASM268173v1								ftp://ftp.ncbi.nlm.nih.gov/genomes/all/GCF/000/961/195/GCF_000961195.1_ASM96119v1
ftp://ftp.ncbi.nlm.nih.gov/genomes/all/GCA/002/681/755/GCA_002681755.1_ASM268175v1								ftp://ftp.ncbi.nlm.nih.gov/genomes/all/GCF/000/961/215/GCF_000961215.1_ASM96121v1
ftp://ftp.ncbi.nlm.nih.gov/genomes/all/GCA/002/681/775/GCA_002681775.1_ASM268177v1								ftp://ftp.ncbi.nlm.nih.gov/genomes/all/GCF/000/961/235/GCF_000961235.1_ASM96123v1
ftp://ftp.ncbi.nlm.nih.gov/genomes/all/GCA/002/681/795/GCA_002681795.1_ASM268179v1								ftp://ftp.ncbi.nlm.nih.gov/genomes/all/GCF/000/961/255/GCF_000961255.1_ASM96125v1
ftp://ftp.ncbi.nlm.nih.gov/genomes/all/GCA/002/681/815/GCA_002681815.1_ASM268181v1								ftp://ftp.ncbi.nlm.nih.gov/genomes/all/GCF/000/961/275/GCF_000961275.1_ASM96127v1
ftp://ftp.ncbi.nlm.nih.gov/genomes/all/GCA/002/681/835/GCA_002681835.1_ASM268183v1								ftp://ftp.ncbi.nlm.nih.gov/genomes/all/GCF/000/961/295/GCF_000961295.1_ASM96129v1
ftp://ftp.ncbi.nlm.nih.gov/genomes/all/GCA/002/681/855/GCA_002681855.1_ASM268185v1								ftp://ftp.ncbi.nlm.nih.gov/genomes/all/GCF/000/961/315/GCF_000961315.1_ASM96131v1
ftp://ftp.ncbi.nlm.nih.gov/genomes/all/GCA/002/681/875/GCA_002681875.1_ASM268187v1								ftp://ftp.ncbi.nlm.nih.gov/genomes/all/GCF/000/961/335/GCF_000961335.1_ASM96133v1
ftp://ftp.ncbi.nlm.nih.gov/genomes/all/GCA/002/681/895/GCA_002681895.1_ASM268189v1								ftp://ftp.ncbi.nlm.nih.gov/genomes/all/GCF/000/961/355/GCF_000961355.1_ASM96135v1
ftp://ftp.ncbi.nlm.nih.gov/genomes/all/GCA/002/681/915/GCA_002681915.1_ASM268191v1								ftp://ftp.ncbi.nlm.nih.gov/genomes/all/GCF/000/961/375/GCF_000961375.1_ASM96137v1
ftp://ftp.ncbi.nlm.nih.gov/genomes/all/GCA/002/681/955/GCA_002681955.1_ASM268195v1								ftp://ftp.ncbi.nlm.nih.gov/genomes/all/GCF/000/961/395/GCF_000961395.1_ASM96139v1
ftp://ftp.ncbi.nlm.nih.gov/genomes/all/GCA/002/681/975/GCA_002681975.1_ASM268197v1								ftp://ftp.ncbi.nlm.nih.gov/genomes/all/GCF/000/961/415/GCF_000961415.1_ASM96141v1
ftp://ftp.ncbi.nlm.nih.gov/genomes/all/GCA/002/682/755/GCA_002682755.1_ASM268275v1								ftp://ftp.ncbi.nlm.nih.gov/genomes/all/GCF/000/961/435/GCF_000961435.1_ASM96143v1
ftp://ftp.ncbi.nlm.nih.gov/genomes/all/GCA/002/645/795/GCA_002645795.1_ASM264579v1								ftp://ftp.ncbi.nlm.nih.gov/genomes/all/GCF/000/961/455/GCF_000961455.1_ASM96145v1
ftp://ftp.ncbi.nlm.nih.gov/genomes/all/GCA/002/655/795/GCA_002655795.1_ASM265579v1								ftp://ftp.ncbi.nlm.nih.gov/genomes/all/GCF/000/961/475/GCF_000961475.1_ASM96147v1
ftp://ftp.ncbi.nlm.nih.gov/genomes/all/GCA/002/601/345/GCA_002601345.1_ASM260134v1								ftp://ftp.ncbi.nlm.nih.gov/genomes/all/GCF/000/961/495/GCF_000961495.1_ASM96149v1
ftp://ftp.ncbi.nlm.nih.gov/genomes/all/GCA/000/922/995/GCA_000922995.1_ViralProj253324								ftp://ftp.ncbi.nlm.nih.gov/genomes/all/GCF/001/028/285/GCF_001028285.3_ASM102828v3
ftp://ftp.ncbi.nlm.nih.gov/genomes/all/GCA/000/920/015/GCA_000920015.1_ViralProj248745								ftp://ftp.ncbi.nlm.nih.gov/genomes/all/GCF/001/719/145/GCF_001719145.1_ASM171914v1
ftp://ftp.ncbi.nlm.nih.gov/genomes/all/GCA/000/922/795/GCA_000922795.1_ViralProj248746								ftp://ftp.ncbi.nlm.nih.gov/genomes/all/GCF/001/854/145/GCF_001854145.1_ASM185414v1
ftp://ftp.ncbi.nlm.nih.gov/genomes/all/GCA/002/659/935/GCA_002659935.1_ASM265993v1								ftp://ftp.ncbi.nlm.nih.gov/genomes/all/GCF/001/922/045/GCF_001922045.1_ASM192204v1
ftp://ftp.ncbi.nlm.nih.gov/genomes/all/GCA/002/659/955/GCA_002659955.1_ASM265995v1								ftp://ftp.ncbi.nlm.nih.gov/genomes/all/GCF/001/922/065/GCF_001922065.1_ASM192206v1
ftp://ftp.ncbi.nlm.nih.gov/genomes/all/GCA/002/659/995/GCA_002659995.1_ASM265999v1								ftp://ftp.ncbi.nlm.nih.gov/genomes/all/GCF/001/922/085/GCF_001922085.1_ASM192208v1
ftp://ftp.ncbi.nlm.nih.gov/genomes/all/GCA/000/921/875/GCA_000921875.1_ViralProj253219								ftp://ftp.ncbi.nlm.nih.gov/genomes/all/GCF/001/922/105/GCF_001922105.1_ASM192210v1
ftp://ftp.ncbi.nlm.nih.gov/genomes/all/GCA/000/921/895/GCA_000921895.1_ViralProj253223								ftp://ftp.ncbi.nlm.nih.gov/genomes/all/GCF/002/139/955/GCF_002139955.1_ASM213995v1
ftp://ftp.ncbi.nlm.nih.gov/genomes/all/GCA/000/922/935/GCA_000922935.1_ViralProj253220								ftp://ftp.ncbi.nlm.nih.gov/genomes/all/GCF/002/139/975/GCF_002139975.1_ASM213997v1
ftp://ftp.ncbi.nlm.nih.gov/genomes/all/GCA/000/921/135/GCA_000921135.1_ViralProj253330								ftp://ftp.ncbi.nlm.nih.gov/genomes/all/GCF/002/139/995/GCF_002139995.1_ASM213999v1
ftp://ftp.ncbi.nlm.nih.gov/genomes/all/GCA/000/921/155/GCA_000921155.1_ViralProj253384								ftp://ftp.ncbi.nlm.nih.gov/genomes/all/GCF/002/163/775/GCF_002163775.1_ASM216377v1
ftp://ftp.ncbi.nlm.nih.gov/genomes/all/GCA/000/921/915/GCA_000921915.1_ViralProj253319								ftp://ftp.ncbi.nlm.nih.gov/genomes/all/GCF/002/218/245/GCF_002218245.1_ASM221824v1
ftp://ftp.ncbi.nlm.nih.gov/genomes/all/GCA/000/921/995/GCA_000921995.1_ViralProj253385								ftp://ftp.ncbi.nlm.nih.gov/genomes/all/GCF/002/218/265/GCF_002218265.1_ASM221826v1
ftp://ftp.ncbi.nlm.nih.gov/genomes/all/GCA/000/923/075/GCA_000923075.1_ViralProj253390								ftp://ftp.ncbi.nlm.nih.gov/genomes/all/GCF/002/218/285/GCF_002218285.1_ASM221828v1
ftp://ftp.ncbi.nlm.nih.gov/genomes/all/GCA/000/923/695/GCA_000923695.1_ViralProj253387								ftp://ftp.ncbi.nlm.nih.gov/genomes/all/GCF/002/224/525/GCF_002224525.1_ASM222452v1
ftp://ftp.ncbi.nlm.nih.gov/genomes/all/GCA/002/604/385/GCA_002604385.1_ASM260438v1								ftp://ftp.ncbi.nlm.nih.gov/genomes/all/GCF/002/224/545/GCF_002224545.1_ASM222454v1
ftp://ftp.ncbi.nlm.nih.gov/genomes/all/GCA/002/604/365/GCA_002604365.1_ASM260436v1								ftp://ftp.ncbi.nlm.nih.gov/genomes/all/GCF/002/288/565/GCF_002288565.1_ASM228856v1
ftp://ftp.ncbi.nlm.nih.gov/genomes/all/GCA/002/604/405/GCA_002604405.1_ASM260440v1								ftp://ftp.ncbi.nlm.nih.gov/genomes/all/GCF/002/288/585/GCF_002288585.1_ASM228858v1
ftp://ftp.ncbi.nlm.nih.gov/genomes/all/GCA/000/923/615/GCA_000923615.1_ViralProj253321								ftp://ftp.ncbi.nlm.nih.gov/genomes/all/GCF/002/759/175/GCF_002759175.1_ASM275917v1
ftp://ftp.ncbi.nlm.nih.gov/genomes/all/GCA/002/679/135/GCA_002679135.1_ASM267913v1								ftp://ftp.ncbi.nlm.nih.gov/genomes/all/GCF/002/759/195/GCF_002759195.1_ASM275919v1
ftp://ftp.ncbi.nlm.nih.gov/genomes/all/GCA/002/679/155/GCA_002679155.1_ASM267915v1								ftp://ftp.ncbi.nlm.nih.gov/genomes/all/GCF/002/759/215/GCF_002759215.1_ASM275921v1
ftp://ftp.ncbi.nlm.nih.gov/genomes/all/GCA/002/679/175/GCA_002679175.1_ASM267917v1								ftp://ftp.ncbi.nlm.nih.gov/genomes/all/GCF/002/759/235/GCF_002759235.1_ASM275923v1
ftp://ftp.ncbi.nlm.nih.gov/genomes/all/GCA/002/679/195/GCA_002679195.1_ASM267919v1								ftp://ftp.ncbi.nlm.nih.gov/genomes/all/GCF/002/759/255/GCF_002759255.1_ASM275925v1
ftp://ftp.ncbi.nlm.nih.gov/genomes/all/GCA/002/679/215/GCA_002679215.1_ASM267921v1								ftp://ftp.ncbi.nlm.nih.gov/genomes/all/GCF/002/759/275/GCF_002759275.1_ASM275927v1
ftp://ftp.ncbi.nlm.nih.gov/genomes/all/GCA/002/679/235/GCA_002679235.1_ASM267923v1								ftp://ftp.ncbi.nlm.nih.gov/genomes/all/GCF/002/759/295/GCF_002759295.1_ASM275929v1
ftp://ftp.ncbi.nlm.nih.gov/genomes/all/GCA/002/679/255/GCA_002679255.1_ASM267925v1								ftp://ftp.ncbi.nlm.nih.gov/genomes/all/GCF/002/759/315/GCF_002759315.1_ASM275931v1
ftp://ftp.ncbi.nlm.nih.gov/genomes/all/GCA/002/679/295/GCA_002679295.1_ASM267929v1								ftp://ftp.ncbi.nlm.nih.gov/genomes/all/GCF/002/759/335/GCF_002759335.1_ASM275933v1
ftp://ftp.ncbi.nlm.nih.gov/genomes/all/GCA/002/679/315/GCA_002679315.1_ASM267931v1								ftp://ftp.ncbi.nlm.nih.gov/genomes/all/GCF/002/759/355/GCF_002759355.1_ASM275935v1
ftp://ftp.ncbi.nlm.nih.gov/genomes/all/GCA/002/679/335/GCA_002679335.1_ASM267933v1								ftp://ftp.ncbi.nlm.nih.gov/genomes/all/GCF/002/759/395/GCF_002759395.1_ASM275939v1
ftp://ftp.ncbi.nlm.nih.gov/genomes/all/GCA/002/679/355/GCA_002679355.1_ASM267935v1								ftp://ftp.ncbi.nlm.nih.gov/genomes/all/GCF/002/759/415/GCF_002759415.1_ASM275941v1
ftp://ftp.ncbi.nlm.nih.gov/genomes/all/GCA/002/679/375/GCA_002679375.1_ASM267937v1								ftp://ftp.ncbi.nlm.nih.gov/genomes/all/GCF/000/019/585/GCF_000019585.2_ASM1958v2
ftp://ftp.ncbi.nlm.nih.gov/genomes/all/GCA/002/679/395/GCA_002679395.1_ASM267939v1								ftp://ftp.ncbi.nlm.nih.gov/genomes/all/GCF/000/168/315/GCF_000168315.3_ASM16831v3
ftp://ftp.ncbi.nlm.nih.gov/genomes/all/GCA/002/679/415/GCA_002679415.1_ASM267941v1								ftp://ftp.ncbi.nlm.nih.gov/genomes/all/GCF/000/940/825/GCF_000940825.1_ASM94082v1
ftp://ftp.ncbi.nlm.nih.gov/genomes/all/GCA/002/679/435/GCA_002679435.1_ASM267943v1								ftp://ftp.ncbi.nlm.nih.gov/genomes/all/GCF/000/948/075/GCF_000948075.1_ASM94807v1
ftp://ftp.ncbi.nlm.nih.gov/genomes/all/GCA/002/679/455/GCA_002679455.1_ASM267945v1								ftp://ftp.ncbi.nlm.nih.gov/genomes/all/GCF/001/021/915/GCF_001021915.1_ASM102191v1
ftp://ftp.ncbi.nlm.nih.gov/genomes/all/GCA/002/679/475/GCA_002679475.1_ASM267947v1								ftp://ftp.ncbi.nlm.nih.gov/genomes/all/GCF/001/042/735/GCF_001042735.1_ASM104273v1
ftp://ftp.ncbi.nlm.nih.gov/genomes/all/GCA/002/679/515/GCA_002679515.1_ASM267951v1								ftp://ftp.ncbi.nlm.nih.gov/genomes/all/GCF/001/042/745/GCF_001042745.1_ASM104274v1
ftp://ftp.ncbi.nlm.nih.gov/genomes/all/GCA/002/679/535/GCA_002679535.1_ASM267953v1								ftp://ftp.ncbi.nlm.nih.gov/genomes/all/GCF/001/042/775/GCF_001042775.1_ASM104277v1
ftp://ftp.ncbi.nlm.nih.gov/genomes/all/GCA/002/679/555/GCA_002679555.1_ASM267955v1								ftp://ftp.ncbi.nlm.nih.gov/genomes/all/GCF/001/042/795/GCF_001042795.1_ASM104279v1
ftp://ftp.ncbi.nlm.nih.gov/genomes/all/GCA/002/679/575/GCA_002679575.1_ASM267957v1								ftp://ftp.ncbi.nlm.nih.gov/genomes/all/GCF/001/042/815/GCF_001042815.1_ASM104281v1
ftp://ftp.ncbi.nlm.nih.gov/genomes/all/GCA/002/679/595/GCA_002679595.1_ASM267959v1								ftp://ftp.ncbi.nlm.nih.gov/genomes/all/GCF/001/042/835/GCF_001042835.1_ASM104283v1
ftp://ftp.ncbi.nlm.nih.gov/genomes/all/GCA/002/679/615/GCA_002679615.1_ASM267961v1								ftp://ftp.ncbi.nlm.nih.gov/genomes/all/GCF/001/042/855/GCF_001042855.1_ASM104285v1
ftp://ftp.ncbi.nlm.nih.gov/genomes/all/GCA/002/679/635/GCA_002679635.1_ASM267963v1								ftp://ftp.ncbi.nlm.nih.gov/genomes/all/GCF/001/042/875/GCF_001042875.1_ASM104287v1
ftp://ftp.ncbi.nlm.nih.gov/genomes/all/GCA/002/679/655/GCA_002679655.1_ASM267965v1								ftp://ftp.ncbi.nlm.nih.gov/genomes/all/GCF/001/466/505/GCF_001466505.1_ASM146650v1
ftp://ftp.ncbi.nlm.nih.gov/genomes/all/GCA/002/679/675/GCA_002679675.1_ASM267967v1								ftp://ftp.ncbi.nlm.nih.gov/genomes/all/GCF/001/518/895/GCF_001518895.1_ASM151889v1
ftp://ftp.ncbi.nlm.nih.gov/genomes/all/GCA/002/679/695/GCA_002679695.1_ASM267969v1								ftp://ftp.ncbi.nlm.nih.gov/genomes/all/GCF/001/746/595/GCF_001746595.1_ASM174659v1
ftp://ftp.ncbi.nlm.nih.gov/genomes/all/GCA/002/679/735/GCA_002679735.1_ASM267973v1								ftp://ftp.ncbi.nlm.nih.gov/genomes/all/GCF/001/746/615/GCF_001746615.1_ASM174661v1
ftp://ftp.ncbi.nlm.nih.gov/genomes/all/GCA/002/679/755/GCA_002679755.1_ASM267975v1								ftp://ftp.ncbi.nlm.nih.gov/genomes/all/GCF/001/746/635/GCF_001746635.1_ASM174663v1
ftp://ftp.ncbi.nlm.nih.gov/genomes/all/GCA/002/679/775/GCA_002679775.1_ASM267977v1								ftp://ftp.ncbi.nlm.nih.gov/genomes/all/GCF/001/746/655/GCF_001746655.1_ASM174665v1
ftp://ftp.ncbi.nlm.nih.gov/genomes/all/GCA/002/679/795/GCA_002679795.1_ASM267979v1								ftp://ftp.ncbi.nlm.nih.gov/genomes/all/GCF/001/746/695/GCF_001746695.1_ASM174669v1
ftp://ftp.ncbi.nlm.nih.gov/genomes/all/GCA/002/679/815/GCA_002679815.1_ASM267981v1								ftp://ftp.ncbi.nlm.nih.gov/genomes/all/GCF/001/746/715/GCF_001746715.1_ASM174671v1
ftp://ftp.ncbi.nlm.nih.gov/genomes/all/GCA/002/679/835/GCA_002679835.1_ASM267983v1								ftp://ftp.ncbi.nlm.nih.gov/genomes/all/GCF/001/746/735/GCF_001746735.1_ASM174673v1
ftp://ftp.ncbi.nlm.nih.gov/genomes/all/GCA/002/679/855/GCA_002679855.1_ASM267985v1								ftp://ftp.ncbi.nlm.nih.gov/genomes/all/GCF/002/023/005/GCF_002023005.1_ASM202300v1
ftp://ftp.ncbi.nlm.nih.gov/genomes/all/GCA/002/679/875/GCA_002679875.1_ASM267987v1								ftp://ftp.ncbi.nlm.nih.gov/genomes/all/GCF/002/850/075/GCF_002850075.1_ASM285007v1
ftp://ftp.ncbi.nlm.nih.gov/genomes/all/GCA/002/679/895/GCA_002679895.1_ASM267989v1								ftp://ftp.ncbi.nlm.nih.gov/genomes/all/GCF/002/850/095/GCF_002850095.1_ASM285009v1
ftp://ftp.ncbi.nlm.nih.gov/genomes/all/GCA/002/679/915/GCA_002679915.1_ASM267991v1								ftp://ftp.ncbi.nlm.nih.gov/genomes/all/GCF/002/850/115/GCF_002850115.1_ASM285011v1
ftp://ftp.ncbi.nlm.nih.gov/genomes/all/GCA/002/679/955/GCA_002679955.1_ASM267995v1								ftp://ftp.ncbi.nlm.nih.gov/genomes/all/GCF/002/850/135/GCF_002850135.1_ASM285013v1
ftp://ftp.ncbi.nlm.nih.gov/genomes/all/GCA/002/679/975/GCA_002679975.1_ASM267997v1								ftp://ftp.ncbi.nlm.nih.gov/genomes/all/GCF/002/850/155/GCF_002850155.1_ASM285015v1
ftp://ftp.ncbi.nlm.nih.gov/genomes/all/GCA/002/679/995/GCA_002679995.1_ASM267999v1								ftp://ftp.ncbi.nlm.nih.gov/genomes/all/GCF/002/850/175/GCF_002850175.1_ASM285017v1
ftp://ftp.ncbi.nlm.nih.gov/genomes/all/GCA/002/680/015/GCA_002680015.1_ASM268001v1								ftp://ftp.ncbi.nlm.nih.gov/genomes/all/GCF/002/850/195/GCF_002850195.1_ASM285019v1
ftp://ftp.ncbi.nlm.nih.gov/genomes/all/GCA/002/680/035/GCA_002680035.1_ASM268003v1								ftp://ftp.ncbi.nlm.nih.gov/genomes/all/GCF/002/850/215/GCF_002850215.1_ASM285021v1
ftp://ftp.ncbi.nlm.nih.gov/genomes/all/GCA/002/680/055/GCA_002680055.1_ASM268005v1								ftp://ftp.ncbi.nlm.nih.gov/genomes/all/GCF/000/817/975/GCF_000817975.1_ASM81797v1
ftp://ftp.ncbi.nlm.nih.gov/genomes/all/GCA/002/680/075/GCA_002680075.1_ASM268007v1								ftp://ftp.ncbi.nlm.nih.gov/genomes/all/GCF/002/220/155/GCF_002220155.1_ASM222015v1
ftp://ftp.ncbi.nlm.nih.gov/genomes/all/GCA/002/680/095/GCA_002680095.1_ASM268009v1								ftp://ftp.ncbi.nlm.nih.gov/genomes/all/GCF/000/971/565/GCF_000971565.1_ASM97156v1
ftp://ftp.ncbi.nlm.nih.gov/genomes/all/GCA/002/680/115/GCA_002680115.1_ASM268011v1								ftp://ftp.ncbi.nlm.nih.gov/genomes/all/GCF/001/551/895/GCF_001551895.1_ASM155189v1
ftp://ftp.ncbi.nlm.nih.gov/genomes/all/GCA/002/680/135/GCA_002680135.1_ASM268013v1								ftp://ftp.ncbi.nlm.nih.gov/genomes/all/GCF/002/005/205/GCF_002005205.2_ASM200520v2
ftp://ftp.ncbi.nlm.nih.gov/genomes/all/GCA/002/680/175/GCA_002680175.1_ASM268017v1								ftp://ftp.ncbi.nlm.nih.gov/genomes/all/GCF/000/807/315/GCF_000807315.1_ASM80731v1
ftp://ftp.ncbi.nlm.nih.gov/genomes/all/GCA/002/680/195/GCA_002680195.1_ASM268019v1								ftp://ftp.ncbi.nlm.nih.gov/genomes/all/GCF/001/887/695/GCF_001887695.1_ASM188769v1
ftp://ftp.ncbi.nlm.nih.gov/genomes/all/GCA/002/680/215/GCA_002680215.1_ASM268021v1								ftp://ftp.ncbi.nlm.nih.gov/genomes/all/GCF/900/011/245/GCF_900011245.1_BF49.v1
ftp://ftp.ncbi.nlm.nih.gov/genomes/all/GCA/002/680/235/GCA_002680235.1_ASM268023v1								ftp://ftp.ncbi.nlm.nih.gov/genomes/all/GCF/002/288/485/GCF_002288485.1_ASM228848v1
ftp://ftp.ncbi.nlm.nih.gov/genomes/all/GCA/002/680/255/GCA_002680255.1_ASM268025v1								ftp://ftp.ncbi.nlm.nih.gov/genomes/all/GCF/001/676/765/GCF_001676765.1_ASM167676v1
ftp://ftp.ncbi.nlm.nih.gov/genomes/all/GCA/002/680/275/GCA_002680275.1_ASM268027v1								ftp://ftp.ncbi.nlm.nih.gov/genomes/all/GCF/000/320/385/GCF_000320385.2_ASM32038v2
ftp://ftp.ncbi.nlm.nih.gov/genomes/all/GCA/002/680/295/GCA_002680295.1_ASM268029v1								ftp://ftp.ncbi.nlm.nih.gov/genomes/all/GCF/000/747/295/GCF_000747295.1_ASM74729v1
ftp://ftp.ncbi.nlm.nih.gov/genomes/all/GCA/002/680/315/GCA_002680315.1_ASM268031v1								ftp://ftp.ncbi.nlm.nih.gov/genomes/all/GCF/001/050/915/GCF_001050915.2_ASM105091v2
ftp://ftp.ncbi.nlm.nih.gov/genomes/all/GCA/002/680/335/GCA_002680335.1_ASM268033v1								ftp://ftp.ncbi.nlm.nih.gov/genomes/all/GCF/002/197/025/GCF_002197025.1_ASM219702v1
ftp://ftp.ncbi.nlm.nih.gov/genomes/all/GCA/002/680/355/GCA_002680355.1_ASM268035v1								ftp://ftp.ncbi.nlm.nih.gov/genomes/all/GCF/002/197/045/GCF_002197045.1_ASM219704v1
ftp://ftp.ncbi.nlm.nih.gov/genomes/all/GCA/002/680/395/GCA_002680395.1_ASM268039v1								ftp://ftp.ncbi.nlm.nih.gov/genomes/all/GCF/002/197/065/GCF_002197065.1_ASM219706v1
ftp://ftp.ncbi.nlm.nih.gov/genomes/all/GCA/002/680/415/GCA_002680415.1_ASM268041v1								ftp://ftp.ncbi.nlm.nih.gov/genomes/all/GCF/002/197/085/GCF_002197085.1_ASM219708v1
ftp://ftp.ncbi.nlm.nih.gov/genomes/all/GCA/002/680/435/GCA_002680435.1_ASM268043v1								ftp://ftp.ncbi.nlm.nih.gov/genomes/all/GCF/002/197/105/GCF_002197105.1_ASM219710v1
ftp://ftp.ncbi.nlm.nih.gov/genomes/all/GCA/002/680/455/GCA_002680455.1_ASM268045v1								ftp://ftp.ncbi.nlm.nih.gov/genomes/all/GCF/002/197/125/GCF_002197125.1_ASM219712v1
ftp://ftp.ncbi.nlm.nih.gov/genomes/all/GCA/002/680/475/GCA_002680475.1_ASM268047v1								ftp://ftp.ncbi.nlm.nih.gov/genomes/all/GCF/002/197/145/GCF_002197145.1_ASM219714v1
ftp://ftp.ncbi.nlm.nih.gov/genomes/all/GCA/002/680/495/GCA_002680495.1_ASM268049v1								ftp://ftp.ncbi.nlm.nih.gov/genomes/all/GCF/002/197/165/GCF_002197165.1_ASM219716v1
ftp://ftp.ncbi.nlm.nih.gov/genomes/all/GCA/002/680/515/GCA_002680515.1_ASM268051v1								ftp://ftp.ncbi.nlm.nih.gov/genomes/all/GCF/002/197/445/GCF_002197445.1_ASM219744v1
ftp://ftp.ncbi.nlm.nih.gov/genomes/all/GCA/002/680/535/GCA_002680535.1_ASM268053v1								ftp://ftp.ncbi.nlm.nih.gov/genomes/all/GCF/002/197/465/GCF_002197465.1_ASM219746v1
ftp://ftp.ncbi.nlm.nih.gov/genomes/all/GCA/002/680/555/GCA_002680555.1_ASM268055v1								ftp://ftp.ncbi.nlm.nih.gov/genomes/all/GCF/002/215/195/GCF_002215195.1_ASM221519v1
ftp://ftp.ncbi.nlm.nih.gov/genomes/all/GCA/002/680/575/GCA_002680575.1_ASM268057v1								ftp://ftp.ncbi.nlm.nih.gov/genomes/all/GCF/002/302/355/GCF_002302355.1_ASM230235v1
ftp://ftp.ncbi.nlm.nih.gov/genomes/all/GCA/002/680/635/GCA_002680635.1_ASM268063v1								ftp://ftp.ncbi.nlm.nih.gov/genomes/all/GCF/002/302/375/GCF_002302375.1_ASM230237v1
ftp://ftp.ncbi.nlm.nih.gov/genomes/all/GCA/002/680/655/GCA_002680655.1_ASM268065v1								ftp://ftp.ncbi.nlm.nih.gov/genomes/all/GCF/000/517/605/GCF_000517605.1_ASM51760v1
ftp://ftp.ncbi.nlm.nih.gov/genomes/all/GCA/002/680/675/GCA_002680675.1_ASM268067v1								ftp://ftp.ncbi.nlm.nih.gov/genomes/all/GCF/000/520/875/GCF_000520875.1_ASM52087v1
ftp://ftp.ncbi.nlm.nih.gov/genomes/all/GCA/002/680/695/GCA_002680695.1_ASM268069v1								ftp://ftp.ncbi.nlm.nih.gov/genomes/all/GCF/001/890/425/GCF_001890425.1_ASM189042v1
ftp://ftp.ncbi.nlm.nih.gov/genomes/all/GCA/002/680/715/GCA_002680715.1_ASM268071v1								ftp://ftp.ncbi.nlm.nih.gov/genomes/all/GCF/002/240/185/GCF_002240185.1_ASM224018v1
ftp://ftp.ncbi.nlm.nih.gov/genomes/all/GCA/002/680/735/GCA_002680735.1_ASM268073v1								ftp://ftp.ncbi.nlm.nih.gov/genomes/all/GCF/002/243/365/GCF_002243365.1_ASM224336v1
ftp://ftp.ncbi.nlm.nih.gov/genomes/all/GCA/002/680/755/GCA_002680755.1_ASM268075v1								ftp://ftp.ncbi.nlm.nih.gov/genomes/all/GCF/000/172/715/GCF_000172715.2_ASM17271v2
ftp://ftp.ncbi.nlm.nih.gov/genomes/all/GCA/002/680/775/GCA_002680775.1_ASM268077v1								ftp://ftp.ncbi.nlm.nih.gov/genomes/all/GCF/001/664/105/GCF_001664105.1_ASM166410v1
ftp://ftp.ncbi.nlm.nih.gov/genomes/all/GCA/002/680/795/GCA_002680795.1_ASM268079v1								ftp://ftp.ncbi.nlm.nih.gov/genomes/all/GCF/001/664/125/GCF_001664125.1_ASM166412v1
ftp://ftp.ncbi.nlm.nih.gov/genomes/all/GCA/002/680/815/GCA_002680815.1_ASM268081v1								ftp://ftp.ncbi.nlm.nih.gov/genomes/all/GCF/001/664/165/GCF_001664165.1_ASM166416v1
ftp://ftp.ncbi.nlm.nih.gov/genomes/all/GCA/002/680/855/GCA_002680855.1_ASM268085v1								ftp://ftp.ncbi.nlm.nih.gov/genomes/all/GCF/001/664/185/GCF_001664185.1_ASM166418v1
ftp://ftp.ncbi.nlm.nih.gov/genomes/all/GCA/002/680/875/GCA_002680875.1_ASM268087v1								ftp://ftp.ncbi.nlm.nih.gov/genomes/all/GCF/001/664/205/GCF_001664205.1_ASM166420v1
ftp://ftp.ncbi.nlm.nih.gov/genomes/all/GCA/000/922/895/GCA_000922895.1_ViralProj252623								ftp://ftp.ncbi.nlm.nih.gov/genomes/all/GCF/001/664/225/GCF_001664225.1_ASM166422v1
ftp://ftp.ncbi.nlm.nih.gov/genomes/all/GCA/000/921/075/GCA_000921075.1_ViralProj253318								ftp://ftp.ncbi.nlm.nih.gov/genomes/all/GCF/001/664/245/GCF_001664245.1_ASM166424v1
ftp://ftp.ncbi.nlm.nih.gov/genomes/all/GCA/000/921/115/GCA_000921115.1_ViralProj253326								ftp://ftp.ncbi.nlm.nih.gov/genomes/all/GCF/001/664/285/GCF_001664285.1_ASM166428v1
ftp://ftp.ncbi.nlm.nih.gov/genomes/all/GCA/000/923/575/GCA_000923575.1_ViralProj253221								ftp://ftp.ncbi.nlm.nih.gov/genomes/all/GCF/001/664/365/GCF_001664365.1_ASM166436v1
ftp://ftp.ncbi.nlm.nih.gov/genomes/all/GCA/000/923/595/GCA_000923595.1_ViralProj253225								ftp://ftp.ncbi.nlm.nih.gov/genomes/all/GCF/001/664/385/GCF_001664385.1_ASM166438v1
ftp://ftp.ncbi.nlm.nih.gov/genomes/all/GCA/000/923/635/GCA_000923635.1_ViralProj253325								ftp://ftp.ncbi.nlm.nih.gov/genomes/all/GCF/001/664/405/GCF_001664405.1_ASM166440v1
ftp://ftp.ncbi.nlm.nih.gov/genomes/all/GCA/000/923/675/GCA_000923675.1_ViralProj253383								ftp://ftp.ncbi.nlm.nih.gov/genomes/all/GCF/001/664/425/GCF_001664425.1_ASM166442v1
ftp://ftp.ncbi.nlm.nih.gov/genomes/all/GCA/001/503/575/GCA_001503575.1_ViralProj307943								ftp://ftp.ncbi.nlm.nih.gov/genomes/all/GCF/001/664/445/GCF_001664445.1_ASM166444v1
ftp://ftp.ncbi.nlm.nih.gov/genomes/all/GCA/001/507/515/GCA_001507515.1_ViralProj253205								ftp://ftp.ncbi.nlm.nih.gov/genomes/all/GCF/000/731/295/GCF_000731295.1_RG1141_Ch_pA_pB
ftp://ftp.ncbi.nlm.nih.gov/genomes/all/GCA/000/921/015/GCA_000921015.1_ViralProj252717								ftp://ftp.ncbi.nlm.nih.gov/genomes/all/GCF/000/731/315/GCF_000731315.1_RG540_Ch_pA
ftp://ftp.ncbi.nlm.nih.gov/genomes/all/GCA/000/923/095/GCA_000923095.1_ViralProj253394								ftp://ftp.ncbi.nlm.nih.gov/genomes/all/GCF/001/971/665/GCF_001971665.1_ASM197166v1
ftp://ftp.ncbi.nlm.nih.gov/genomes/all/GCA/000/927/575/GCA_000927575.1_ViralProj266789								ftp://ftp.ncbi.nlm.nih.gov/genomes/all/GCF/900/234/795/GCF_900234795.1_TK0001_PRJEB23178_v1
ftp://ftp.ncbi.nlm.nih.gov/genomes/all/GCA/000/921/855/GCA_000921855.1_ViralProj252745								ftp://ftp.ncbi.nlm.nih.gov/genomes/all/GCF/002/752/655/GCF_002752655.1_ASM275265v1
ftp://ftp.ncbi.nlm.nih.gov/genomes/all/GCA/000/923/035/GCA_000923035.1_ViralProj253340								ftp://ftp.ncbi.nlm.nih.gov/genomes/all/GCF/002/005/445/GCF_002005445.1_ASM200544v1
ftp://ftp.ncbi.nlm.nih.gov/genomes/all/GCA/002/659/835/GCA_002659835.1_ASM265983v1								ftp://ftp.ncbi.nlm.nih.gov/genomes/all/GCF/000/241/585/GCF_000241585.2_ASM24158v3
ftp://ftp.ncbi.nlm.nih.gov/genomes/all/GCA/002/660/275/GCA_002660275.1_ASM266027v1								ftp://ftp.ncbi.nlm.nih.gov/genomes/all/GCF/001/183/745/GCF_001183745.1_ASM118374v1
ftp://ftp.ncbi.nlm.nih.gov/genomes/all/GCA/002/679/715/GCA_002679715.1_ASM267971v1								ftp://ftp.ncbi.nlm.nih.gov/genomes/all/GCF/001/766/235/GCF_001766235.1_ASM176623v1
ftp://ftp.ncbi.nlm.nih.gov/genomes/all/GCA/002/679/935/GCA_002679935.1_ASM267993v1								ftp://ftp.ncbi.nlm.nih.gov/genomes/all/GCF/001/766/255/GCF_001766255.1_ASM176625v1
ftp://ftp.ncbi.nlm.nih.gov/genomes/all/GCA/000/923/715/GCA_000923715.1_ViralProj253391								ftp://ftp.ncbi.nlm.nih.gov/genomes/all/GCF/002/173/735/GCF_002173735.1_ASM217373v1
ftp://ftp.ncbi.nlm.nih.gov/genomes/all/GCA/000/924/175/GCA_000924175.1_ViralProj260452								ftp://ftp.ncbi.nlm.nih.gov/genomes/all/GCF/002/173/775/GCF_002173775.1_ASM217377v1
ftp://ftp.ncbi.nlm.nih.gov/genomes/all/GCA/000/926/095/GCA_000926095.1_ViralProj260480								ftp://ftp.ncbi.nlm.nih.gov/genomes/all/GCF/002/202/135/GCF_002202135.1_ASM220213v1
ftp://ftp.ncbi.nlm.nih.gov/genomes/all/GCA/000/927/395/GCA_000927395.1_ViralProj266675								ftp://ftp.ncbi.nlm.nih.gov/genomes/all/GCF/002/220/195/GCF_002220195.1_ASM222019v1
ftp://ftp.ncbi.nlm.nih.gov/genomes/all/GCA/002/756/135/GCA_002756135.1_ASM275613v1								ftp://ftp.ncbi.nlm.nih.gov/genomes/all/GCF/000/583/855/GCF_000583855.1_ASM58385v1
ftp://ftp.ncbi.nlm.nih.gov/genomes/all/GCA/002/756/155/GCA_002756155.1_ASM275615v1								ftp://ftp.ncbi.nlm.nih.gov/genomes/all/GCF/001/680/825/GCF_001680825.1_ASM168082v1
ftp://ftp.ncbi.nlm.nih.gov/genomes/all/GCA/002/756/175/GCA_002756175.1_ASM275617v1								ftp://ftp.ncbi.nlm.nih.gov/genomes/all/GCF/900/175/995/GCF_900175995.1_ASM90017599v1
ftp://ftp.ncbi.nlm.nih.gov/genomes/all/GCA/002/598/545/GCA_002598545.1_ASM259854v1								ftp://ftp.ncbi.nlm.nih.gov/genomes/all/GCF/001/590/615/GCF_001590615.1_ASM159061v1
ftp://ftp.ncbi.nlm.nih.gov/genomes/all/GCA/000/922/075/GCA_000922075.1_ViralProj253476								ftp://ftp.ncbi.nlm.nih.gov/genomes/all/GCF/001/590/645/GCF_001590645.1_ASM159064v1
ftp://ftp.ncbi.nlm.nih.gov/genomes/all/GCA/000/922/515/GCA_000922515.1_ViralProj260483								ftp://ftp.ncbi.nlm.nih.gov/genomes/all/GCF/001/590/695/GCF_001590695.1_ASM159069v1
ftp://ftp.ncbi.nlm.nih.gov/genomes/all/GCA/000/923/135/GCA_000923135.1_ViralProj253477								ftp://ftp.ncbi.nlm.nih.gov/genomes/all/GCF/001/592/705/GCF_001592705.1_ASM159270v1
ftp://ftp.ncbi.nlm.nih.gov/genomes/all/GCA/000/924/215/GCA_000924215.1_ViralProj260485								ftp://ftp.ncbi.nlm.nih.gov/genomes/all/GCF/001/610/735/GCF_001610735.1_ASM161073v1
ftp://ftp.ncbi.nlm.nih.gov/genomes/all/GCA/000/925/695/GCA_000925695.1_ViralProj266641								ftp://ftp.ncbi.nlm.nih.gov/genomes/all/GCF/001/652/645/GCF_001652645.1_ASM165264v1
ftp://ftp.ncbi.nlm.nih.gov/genomes/all/GCA/000/926/115/GCA_000926115.1_ViralProj260484								ftp://ftp.ncbi.nlm.nih.gov/genomes/all/GCF/001/652/665/GCF_001652665.1_ASM165266v1
ftp://ftp.ncbi.nlm.nih.gov/genomes/all/GCA/000/926/735/GCA_000926735.1_ViralProj266642								ftp://ftp.ncbi.nlm.nih.gov/genomes/all/GCF/001/652/685/GCF_001652685.1_ASM165268v1
ftp://ftp.ncbi.nlm.nih.gov/genomes/all/GCA/000/926/815/GCA_000926815.1_ViralProj266717								ftp://ftp.ncbi.nlm.nih.gov/genomes/all/GCF/001/677/075/GCF_001677075.2_ASM167707v2
ftp://ftp.ncbi.nlm.nih.gov/genomes/all/GCA/000/922/095/GCA_000922095.1_ViralProj253588								ftp://ftp.ncbi.nlm.nih.gov/genomes/all/GCF/001/677/115/GCF_001677115.2_ASM167711v2
ftp://ftp.ncbi.nlm.nih.gov/genomes/all/GCA/000/923/155/GCA_000923155.1_ViralProj253719								ftp://ftp.ncbi.nlm.nih.gov/genomes/all/GCF/001/752/705/GCF_001752705.1_ASM175270v1
ftp://ftp.ncbi.nlm.nih.gov/genomes/all/GCA/000/923/175/GCA_000923175.1_ViralProj253818								ftp://ftp.ncbi.nlm.nih.gov/genomes/all/GCF/001/752/725/GCF_001752725.1_ASM175272v1
ftp://ftp.ncbi.nlm.nih.gov/genomes/all/GCA/000/955/315/GCA_000955315.1_ViralProj276850								ftp://ftp.ncbi.nlm.nih.gov/genomes/all/GCF/001/752/745/GCF_001752745.1_ASM175274v1
ftp://ftp.ncbi.nlm.nih.gov/genomes/all/GCA/002/604/585/GCA_002604585.1_ASM260458v1								ftp://ftp.ncbi.nlm.nih.gov/genomes/all/GCF/001/752/765/GCF_001752765.1_ASM175276v1
ftp://ftp.ncbi.nlm.nih.gov/genomes/all/GCA/002/756/195/GCA_002756195.1_ASM275619v1								ftp://ftp.ncbi.nlm.nih.gov/genomes/all/GCF/001/752/785/GCF_001752785.1_ASM175278v1
ftp://ftp.ncbi.nlm.nih.gov/genomes/all/GCA/000/928/875/GCA_000928875.1_ViralProj269621								ftp://ftp.ncbi.nlm.nih.gov/genomes/all/GCF/001/752/805/GCF_001752805.1_ASM175280v1
ftp://ftp.ncbi.nlm.nih.gov/genomes/all/GCA/002/602/145/GCA_002602145.1_ASM260214v1								ftp://ftp.ncbi.nlm.nih.gov/genomes/all/GCF/001/752/825/GCF_001752825.1_ASM175282v1
ftp://ftp.ncbi.nlm.nih.gov/genomes/all/GCA/000/929/535/GCA_000929535.1_ViralProj266788								ftp://ftp.ncbi.nlm.nih.gov/genomes/all/GCF/001/752/845/GCF_001752845.1_ASM175284v1
ftp://ftp.ncbi.nlm.nih.gov/genomes/all/GCA/002/603/865/GCA_002603865.1_ASM260386v1								ftp://ftp.ncbi.nlm.nih.gov/genomes/all/GCF/001/752/865/GCF_001752865.1_ASM175286v1
ftp://ftp.ncbi.nlm.nih.gov/genomes/all/GCA/002/603/885/GCA_002603885.1_ASM260388v1								ftp://ftp.ncbi.nlm.nih.gov/genomes/all/GCF/001/752/885/GCF_001752885.1_ASM175288v1
ftp://ftp.ncbi.nlm.nih.gov/genomes/all/GCA/002/603/905/GCA_002603905.1_ASM260390v1								ftp://ftp.ncbi.nlm.nih.gov/genomes/all/GCF/001/752/905/GCF_001752905.1_ASM175290v1
ftp://ftp.ncbi.nlm.nih.gov/genomes/all/GCA/002/603/925/GCA_002603925.1_ASM260392v1								ftp://ftp.ncbi.nlm.nih.gov/genomes/all/GCF/001/752/925/GCF_001752925.1_ASM175292v1
ftp://ftp.ncbi.nlm.nih.gov/genomes/all/GCA/002/603/945/GCA_002603945.1_ASM260394v1								ftp://ftp.ncbi.nlm.nih.gov/genomes/all/GCF/001/752/945/GCF_001752945.1_ASM175294v1
ftp://ftp.ncbi.nlm.nih.gov/genomes/all/GCA/002/603/965/GCA_002603965.1_ASM260396v1								ftp://ftp.ncbi.nlm.nih.gov/genomes/all/GCF/001/752/965/GCF_001752965.1_ASM175296v1
ftp://ftp.ncbi.nlm.nih.gov/genomes/all/GCA/000/927/355/GCA_000927355.1_ViralProj266643								ftp://ftp.ncbi.nlm.nih.gov/genomes/all/GCF/001/753/065/GCF_001753065.1_ASM175306v1
ftp://ftp.ncbi.nlm.nih.gov/genomes/all/GCA/002/604/685/GCA_002604685.1_ASM260468v1								ftp://ftp.ncbi.nlm.nih.gov/genomes/all/GCF/001/753/085/GCF_001753085.1_ASM175308v1
ftp://ftp.ncbi.nlm.nih.gov/genomes/all/GCA/000/925/715/GCA_000925715.1_ViralProj266645								ftp://ftp.ncbi.nlm.nih.gov/genomes/all/GCF/001/753/105/GCF_001753105.1_ASM175310v1
ftp://ftp.ncbi.nlm.nih.gov/genomes/all/GCA/001/503/995/GCA_001503995.1_ViralProj307866								ftp://ftp.ncbi.nlm.nih.gov/genomes/all/GCF/001/753/125/GCF_001753125.1_ASM175312v1
ftp://ftp.ncbi.nlm.nih.gov/genomes/all/GCA/000/921/635/GCA_000921635.1_ViralProj260420								ftp://ftp.ncbi.nlm.nih.gov/genomes/all/GCF/001/753/145/GCF_001753145.1_ASM175314v1
ftp://ftp.ncbi.nlm.nih.gov/genomes/all/GCA/000/921/675/GCA_000921675.1_ViralProj260482								ftp://ftp.ncbi.nlm.nih.gov/genomes/all/GCF/001/753/265/GCF_001753265.1_ASM175326v1
ftp://ftp.ncbi.nlm.nih.gov/genomes/all/GCA/000/923/335/GCA_000923335.1_ViralProj257515								ftp://ftp.ncbi.nlm.nih.gov/genomes/all/GCF/001/753/285/GCF_001753285.1_ASM175328v1
ftp://ftp.ncbi.nlm.nih.gov/genomes/all/GCA/000/924/195/GCA_000924195.1_ViralProj260481								ftp://ftp.ncbi.nlm.nih.gov/genomes/all/GCF/001/753/305/GCF_001753305.1_ASM175330v1
ftp://ftp.ncbi.nlm.nih.gov/genomes/all/GCA/002/604/205/GCA_002604205.1_ASM260420v1								ftp://ftp.ncbi.nlm.nih.gov/genomes/all/GCF/001/753/325/GCF_001753325.1_ASM175332v1
ftp://ftp.ncbi.nlm.nih.gov/genomes/all/GCA/000/923/915/GCA_000923915.1_ViralProj255793								ftp://ftp.ncbi.nlm.nih.gov/genomes/all/GCF/001/753/345/GCF_001753345.1_ASM175334v1
ftp://ftp.ncbi.nlm.nih.gov/genomes/all/GCA/002/635/095/GCA_002635095.1_ASM263509v1								ftp://ftp.ncbi.nlm.nih.gov/genomes/all/GCF/001/753/365/GCF_001753365.1_ASM175336v1
ftp://ftp.ncbi.nlm.nih.gov/genomes/all/GCA/002/635/115/GCA_002635115.1_ASM263511v1								ftp://ftp.ncbi.nlm.nih.gov/genomes/all/GCF/001/753/385/GCF_001753385.1_ASM175338v1
ftp://ftp.ncbi.nlm.nih.gov/genomes/all/GCA/000/924/895/GCA_000924895.1_ViralProj266648								ftp://ftp.ncbi.nlm.nih.gov/genomes/all/GCF/001/753/405/GCF_001753405.1_ASM175340v1
ftp://ftp.ncbi.nlm.nih.gov/genomes/all/GCA/000/925/735/GCA_000925735.1_ViralProj266649								ftp://ftp.ncbi.nlm.nih.gov/genomes/all/GCF/001/766/275/GCF_001766275.1_ASM176627v1
ftp://ftp.ncbi.nlm.nih.gov/genomes/all/GCA/000/926/075/GCA_000926075.1_ViralProj260451								ftp://ftp.ncbi.nlm.nih.gov/genomes/all/GCF/001/766/295/GCF_001766295.1_ASM176629v1
ftp://ftp.ncbi.nlm.nih.gov/genomes/all/GCA/000/927/375/GCA_000927375.1_ViralProj266647								ftp://ftp.ncbi.nlm.nih.gov/genomes/all/GCF/001/766/315/GCF_001766315.1_ASM176631v1
ftp://ftp.ncbi.nlm.nih.gov/genomes/all/GCA/000/930/755/GCA_000930755.1_ViralProj271781								ftp://ftp.ncbi.nlm.nih.gov/genomes/all/GCF/001/766/335/GCF_001766335.1_ASM176633v1
ftp://ftp.ncbi.nlm.nih.gov/genomes/all/GCA/002/634/495/GCA_002634495.1_ASM263449v1								ftp://ftp.ncbi.nlm.nih.gov/genomes/all/GCF/001/766/355/GCF_001766355.1_ASM176635v1
ftp://ftp.ncbi.nlm.nih.gov/genomes/all/GCA/002/634/515/GCA_002634515.1_ASM263451v1								ftp://ftp.ncbi.nlm.nih.gov/genomes/all/GCF/001/766/375/GCF_001766375.1_ASM176637v1
ftp://ftp.ncbi.nlm.nih.gov/genomes/all/GCA/002/634/535/GCA_002634535.1_ASM263453v1								ftp://ftp.ncbi.nlm.nih.gov/genomes/all/GCF/001/886/795/GCF_001886795.1_ASM188679v1
ftp://ftp.ncbi.nlm.nih.gov/genomes/all/GCA/002/634/555/GCA_002634555.1_ASM263455v1								ftp://ftp.ncbi.nlm.nih.gov/genomes/all/GCF/001/886/835/GCF_001886835.1_ASM188683v1
ftp://ftp.ncbi.nlm.nih.gov/genomes/all/GCA/002/634/575/GCA_002634575.1_ASM263457v1								ftp://ftp.ncbi.nlm.nih.gov/genomes/all/GCF/001/941/585/GCF_001941585.1_ASM194158v1
ftp://ftp.ncbi.nlm.nih.gov/genomes/all/GCA/002/594/665/GCA_002594665.1_ASM259466v1								ftp://ftp.ncbi.nlm.nih.gov/genomes/all/GCF/001/969/405/GCF_001969405.1_ASM196940v1
ftp://ftp.ncbi.nlm.nih.gov/genomes/all/GCA/000/924/875/GCA_000924875.1_ViralProj266644								ftp://ftp.ncbi.nlm.nih.gov/genomes/all/GCF/001/989/475/GCF_001989475.1_ASM198947v1
ftp://ftp.ncbi.nlm.nih.gov/genomes/all/GCA/000/922/295/GCA_000922295.1_ViralProj257698								ftp://ftp.ncbi.nlm.nih.gov/genomes/all/GCF/002/813/715/GCF_002813715.1_ASM281371v1
ftp://ftp.ncbi.nlm.nih.gov/genomes/all/GCA/000/922/375/GCA_000922375.1_ViralProj259190								ftp://ftp.ncbi.nlm.nih.gov/genomes/all/GCF/002/813/735/GCF_002813735.1_ASM281373v1
ftp://ftp.ncbi.nlm.nih.gov/genomes/all/GCA/000/922/475/GCA_000922475.1_ViralProj260422								ftp://ftp.ncbi.nlm.nih.gov/genomes/all/GCF/900/092/465/GCF_900092465.1_Lpm7613_v1
ftp://ftp.ncbi.nlm.nih.gov/genomes/all/GCA/001/505/175/GCA_001505175.1_ViralProj307940								ftp://ftp.ncbi.nlm.nih.gov/genomes/all/GCF/900/119/755/GCF_900119755.1_2531STDY5467379
ftp://ftp.ncbi.nlm.nih.gov/genomes/all/GCA/000/922/335/GCA_000922335.1_ViralProj258005								ftp://ftp.ncbi.nlm.nih.gov/genomes/all/GCF/900/119/765/GCF_900119765.1_2532STDY5467631
ftp://ftp.ncbi.nlm.nih.gov/genomes/all/GCA/000/923/975/GCA_000923975.1_ViralProj257662								ftp://ftp.ncbi.nlm.nih.gov/genomes/all/GCF/900/119/775/GCF_900119775.1_2531STDY5467446
ftp://ftp.ncbi.nlm.nih.gov/genomes/all/GCA/002/677/535/GCA_002677535.1_ASM267753v1								ftp://ftp.ncbi.nlm.nih.gov/genomes/all/GCF/900/119/785/GCF_900119785.1_2531STDY5467415
ftp://ftp.ncbi.nlm.nih.gov/genomes/all/GCA/002/677/555/GCA_002677555.1_ASM267755v1								ftp://ftp.ncbi.nlm.nih.gov/genomes/all/GCF/900/186/855/GCF_900186855.1_48290_H02
ftp://ftp.ncbi.nlm.nih.gov/genomes/all/GCA/002/677/575/GCA_002677575.1_ASM267757v1								ftp://ftp.ncbi.nlm.nih.gov/genomes/all/GCF/900/186/925/GCF_900186925.1_48450_B02
ftp://ftp.ncbi.nlm.nih.gov/genomes/all/GCA/002/677/595/GCA_002677595.1_ASM267759v1								ftp://ftp.ncbi.nlm.nih.gov/genomes/all/GCF/000/953/655/GCF_000953655.1_LHA
ftp://ftp.ncbi.nlm.nih.gov/genomes/all/GCA/002/677/855/GCA_002677855.1_ASM267785v1								ftp://ftp.ncbi.nlm.nih.gov/genomes/all/GCF/002/073/455/GCF_002073455.1_ASM207345v1
ftp://ftp.ncbi.nlm.nih.gov/genomes/all/GCA/000/921/655/GCA_000921655.1_ViralProj260453								ftp://ftp.ncbi.nlm.nih.gov/genomes/all/GCF/002/113/845/GCF_002113845.1_ASM211384v1
ftp://ftp.ncbi.nlm.nih.gov/genomes/all/GCA/000/921/695/GCA_000921695.1_ViralProj260486								ftp://ftp.ncbi.nlm.nih.gov/genomes/all/GCF/000/953/635/GCF_000953635.1_LMI
ftp://ftp.ncbi.nlm.nih.gov/genomes/all/GCA/000/929/475/GCA_000929475.1_ViralProj266776								ftp://ftp.ncbi.nlm.nih.gov/genomes/all/GCF/002/085/715/GCF_002085715.1_ASM208571v1
ftp://ftp.ncbi.nlm.nih.gov/genomes/all/GCA/000/955/455/GCA_000955455.1_ViralProj276881								ftp://ftp.ncbi.nlm.nih.gov/genomes/all/GCF/002/085/735/GCF_002085735.1_ASM208573v1
ftp://ftp.ncbi.nlm.nih.gov/genomes/all/GCA/001/505/155/GCA_001505155.1_ViralProj307936								ftp://ftp.ncbi.nlm.nih.gov/genomes/all/GCF/900/186/965/GCF_900186965.1_50592_C01
ftp://ftp.ncbi.nlm.nih.gov/genomes/all/GCA/001/534/635/GCA_001534635.1_ViralProj308962								ftp://ftp.ncbi.nlm.nih.gov/genomes/all/GCF/000/021/245/GCF_000021245.2_ASM2124v2
ftp://ftp.ncbi.nlm.nih.gov/genomes/all/GCA/002/604/725/GCA_002604725.1_ASM260472v1								ftp://ftp.ncbi.nlm.nih.gov/genomes/all/GCF/000/186/665/GCF_000186665.3_ASM18666v4
ftp://ftp.ncbi.nlm.nih.gov/genomes/all/GCA/002/604/885/GCA_002604885.1_ASM260488v1								ftp://ftp.ncbi.nlm.nih.gov/genomes/all/GCF/000/498/375/GCF_000498375.2_ASM49837v2
ftp://ftp.ncbi.nlm.nih.gov/genomes/all/GCA/002/756/355/GCA_002756355.1_ASM275635v1								ftp://ftp.ncbi.nlm.nih.gov/genomes/all/GCF/000/695/855/GCF_000695855.3_ASM69585v3
ftp://ftp.ncbi.nlm.nih.gov/genomes/all/GCA/000/922/355/GCA_000922355.1_ViralProj258185								ftp://ftp.ncbi.nlm.nih.gov/genomes/all/GCF/000/746/605/GCF_000746605.1_ASM74660v1
ftp://ftp.ncbi.nlm.nih.gov/genomes/all/GCA/000/924/355/GCA_000924355.1_ViralProj262488								ftp://ftp.ncbi.nlm.nih.gov/genomes/all/GCF/000/746/645/GCF_000746645.1_ASM74664v1
ftp://ftp.ncbi.nlm.nih.gov/genomes/all/GCA/000/924/915/GCA_000924915.1_ViralProj266711								ftp://ftp.ncbi.nlm.nih.gov/genomes/all/GCF/000/761/175/GCF_000761175.1_ASM76117v1
ftp://ftp.ncbi.nlm.nih.gov/genomes/all/GCA/002/659/855/GCA_002659855.1_ASM265985v1								ftp://ftp.ncbi.nlm.nih.gov/genomes/all/GCF/000/786/735/GCF_000786735.1_ASM78673v1
ftp://ftp.ncbi.nlm.nih.gov/genomes/all/GCA/000/924/055/GCA_000924055.1_ViralProj258281								ftp://ftp.ncbi.nlm.nih.gov/genomes/all/GCF/000/814/345/GCF_000814345.1_ASM81434v1
ftp://ftp.ncbi.nlm.nih.gov/genomes/all/GCA/000/926/715/GCA_000926715.1_ViralProj266636								ftp://ftp.ncbi.nlm.nih.gov/genomes/all/GCF/000/828/935/GCF_000828935.1_ASM82893v1
ftp://ftp.ncbi.nlm.nih.gov/genomes/all/GCA/000/925/015/GCA_000925015.1_ViralProj266778								ftp://ftp.ncbi.nlm.nih.gov/genomes/all/GCF/000/830/055/GCF_000830055.1_ASM83005v1
ftp://ftp.ncbi.nlm.nih.gov/genomes/all/GCA/000/927/515/GCA_000927515.1_ViralProj266777								ftp://ftp.ncbi.nlm.nih.gov/genomes/all/GCF/000/939/415/GCF_000939415.2_HGAP_assembly_of_Acinetobacter_baumannii_ORAB01
ftp://ftp.ncbi.nlm.nih.gov/genomes/all/GCA/000/954/295/GCA_000954295.1_ViralProj276863								ftp://ftp.ncbi.nlm.nih.gov/genomes/all/GCF/000/963/815/GCF_000963815.1_ASM96381v1
ftp://ftp.ncbi.nlm.nih.gov/genomes/all/GCA/002/656/875/GCA_002656875.1_ASM265687v1								ftp://ftp.ncbi.nlm.nih.gov/genomes/all/GCF/001/026/965/GCF_001026965.1_ASM102696v1
ftp://ftp.ncbi.nlm.nih.gov/genomes/all/GCA/002/657/095/GCA_002657095.1_ASM265709v1								ftp://ftp.ncbi.nlm.nih.gov/genomes/all/GCF/001/077/555/GCF_001077555.2_ASM107755v2
ftp://ftp.ncbi.nlm.nih.gov/genomes/all/GCA/002/657/315/GCA_002657315.1_ASM265731v1								ftp://ftp.ncbi.nlm.nih.gov/genomes/all/GCF/001/077/655/GCF_001077655.1_ASM107765v1
ftp://ftp.ncbi.nlm.nih.gov/genomes/all/GCA/002/657/535/GCA_002657535.1_ASM265753v1								ftp://ftp.ncbi.nlm.nih.gov/genomes/all/GCF/001/077/675/GCF_001077675.1_ASM107767v1
ftp://ftp.ncbi.nlm.nih.gov/genomes/all/GCA/002/657/755/GCA_002657755.1_ASM265775v1								ftp://ftp.ncbi.nlm.nih.gov/genomes/all/GCF/001/077/965/GCF_001077965.2_ASM107796v2
ftp://ftp.ncbi.nlm.nih.gov/genomes/all/GCA/002/657/975/GCA_002657975.1_ASM265797v1								ftp://ftp.ncbi.nlm.nih.gov/genomes/all/GCF/001/261/895/GCF_001261895.2_R2090
ftp://ftp.ncbi.nlm.nih.gov/genomes/all/GCA/002/658/195/GCA_002658195.1_ASM265819v1								ftp://ftp.ncbi.nlm.nih.gov/genomes/all/GCF/001/399/655/GCF_001399655.1_ASM139965v1
ftp://ftp.ncbi.nlm.nih.gov/genomes/all/GCA/002/658/415/GCA_002658415.1_ASM265841v1								ftp://ftp.ncbi.nlm.nih.gov/genomes/all/GCF/001/457/535/GCF_001457535.1_CIP70.10
ftp://ftp.ncbi.nlm.nih.gov/genomes/all/GCA/002/658/635/GCA_002658635.1_ASM265863v1								ftp://ftp.ncbi.nlm.nih.gov/genomes/all/GCF/001/514/375/GCF_001514375.1_ASM151437v1
ftp://ftp.ncbi.nlm.nih.gov/genomes/all/GCA/002/658/855/GCA_002658855.1_ASM265885v1								ftp://ftp.ncbi.nlm.nih.gov/genomes/all/GCF/001/517/645/GCF_001517645.1_R2091
ftp://ftp.ncbi.nlm.nih.gov/genomes/all/GCA/002/659/095/GCA_002659095.1_ASM265909v1								ftp://ftp.ncbi.nlm.nih.gov/genomes/all/GCF/001/543/995/GCF_001543995.1_ASM154399v1
ftp://ftp.ncbi.nlm.nih.gov/genomes/all/GCA/002/659/315/GCA_002659315.1_ASM265931v1								ftp://ftp.ncbi.nlm.nih.gov/genomes/all/GCF/001/573/065/GCF_001573065.1_ASM157306v1
ftp://ftp.ncbi.nlm.nih.gov/genomes/all/GCA/002/659/535/GCA_002659535.1_ASM265953v1								ftp://ftp.ncbi.nlm.nih.gov/genomes/all/GCF/001/573/085/GCF_001573085.1_ASM157308v1
ftp://ftp.ncbi.nlm.nih.gov/genomes/all/GCA/002/659/755/GCA_002659755.1_ASM265975v1								ftp://ftp.ncbi.nlm.nih.gov/genomes/all/GCF/001/573/105/GCF_001573105.1_ASM157310v1
ftp://ftp.ncbi.nlm.nih.gov/genomes/all/GCA/002/659/975/GCA_002659975.1_ASM265997v1								ftp://ftp.ncbi.nlm.nih.gov/genomes/all/GCF/001/573/125/GCF_001573125.1_ASM157312v1
ftp://ftp.ncbi.nlm.nih.gov/genomes/all/GCA/002/660/195/GCA_002660195.1_ASM266019v1								ftp://ftp.ncbi.nlm.nih.gov/genomes/all/GCF/001/578/145/GCF_001578145.1_ASM157814v1
ftp://ftp.ncbi.nlm.nih.gov/genomes/all/GCA/002/661/215/GCA_002661215.1_ASM266121v1								ftp://ftp.ncbi.nlm.nih.gov/genomes/all/GCF/001/593/425/GCF_001593425.2_ASM159342v2
ftp://ftp.ncbi.nlm.nih.gov/genomes/all/GCA/002/661/235/GCA_002661235.1_ASM266123v1								ftp://ftp.ncbi.nlm.nih.gov/genomes/all/GCF/001/636/235/GCF_001636235.1_ASM163623v1
ftp://ftp.ncbi.nlm.nih.gov/genomes/all/GCA/002/661/255/GCA_002661255.1_ASM266125v1								ftp://ftp.ncbi.nlm.nih.gov/genomes/all/GCF/001/806/345/GCF_001806345.1_ASM180634v1
ftp://ftp.ncbi.nlm.nih.gov/genomes/all/GCA/002/661/275/GCA_002661275.1_ASM266127v1								ftp://ftp.ncbi.nlm.nih.gov/genomes/all/GCF/001/806/365/GCF_001806365.1_ASM180636v1
ftp://ftp.ncbi.nlm.nih.gov/genomes/all/GCA/002/661/335/GCA_002661335.1_ASM266133v1								ftp://ftp.ncbi.nlm.nih.gov/genomes/all/GCF/001/806/385/GCF_001806385.1_ASM180638v1
ftp://ftp.ncbi.nlm.nih.gov/genomes/all/GCA/002/661/355/GCA_002661355.1_ASM266135v1								ftp://ftp.ncbi.nlm.nih.gov/genomes/all/GCF/001/806/405/GCF_001806405.1_ASM180640v1
ftp://ftp.ncbi.nlm.nih.gov/genomes/all/GCA/002/661/375/GCA_002661375.1_ASM266137v1								ftp://ftp.ncbi.nlm.nih.gov/genomes/all/GCF/001/806/425/GCF_001806425.1_ASM180642v1
ftp://ftp.ncbi.nlm.nih.gov/genomes/all/GCA/002/661/395/GCA_002661395.1_ASM266139v1								ftp://ftp.ncbi.nlm.nih.gov/genomes/all/GCF/001/806/445/GCF_001806445.1_ASM180644v1
ftp://ftp.ncbi.nlm.nih.gov/genomes/all/GCA/002/661/415/GCA_002661415.1_ASM266141v1								ftp://ftp.ncbi.nlm.nih.gov/genomes/all/GCF/001/806/465/GCF_001806465.1_ASM180646v1
ftp://ftp.ncbi.nlm.nih.gov/genomes/all/GCA/002/661/435/GCA_002661435.1_ASM266143v1								ftp://ftp.ncbi.nlm.nih.gov/genomes/all/GCF/001/806/485/GCF_001806485.1_ASM180648v1
ftp://ftp.ncbi.nlm.nih.gov/genomes/all/GCA/002/661/455/GCA_002661455.1_ASM266145v1								ftp://ftp.ncbi.nlm.nih.gov/genomes/all/GCF/001/887/305/GCF_001887305.1_ASM188730v1
ftp://ftp.ncbi.nlm.nih.gov/genomes/all/GCA/002/661/475/GCA_002661475.1_ASM266147v1								ftp://ftp.ncbi.nlm.nih.gov/genomes/all/GCF/001/895/985/GCF_001895985.1_ASM189598v1
ftp://ftp.ncbi.nlm.nih.gov/genomes/all/GCA/002/661/495/GCA_002661495.1_ASM266149v1								ftp://ftp.ncbi.nlm.nih.gov/genomes/all/GCF/001/896/005/GCF_001896005.1_ASM189600v1
ftp://ftp.ncbi.nlm.nih.gov/genomes/all/GCA/002/661/515/GCA_002661515.1_ASM266151v1								ftp://ftp.ncbi.nlm.nih.gov/genomes/all/GCF/001/902/375/GCF_001902375.1_ASM190237v1
ftp://ftp.ncbi.nlm.nih.gov/genomes/all/GCA/002/661/555/GCA_002661555.1_ASM266155v1								ftp://ftp.ncbi.nlm.nih.gov/genomes/all/GCF/001/908/295/GCF_001908295.1_ASM190829v1
ftp://ftp.ncbi.nlm.nih.gov/genomes/all/GCA/002/661/575/GCA_002661575.1_ASM266157v1								ftp://ftp.ncbi.nlm.nih.gov/genomes/all/GCF/001/922/205/GCF_001922205.1_ASM192220v1
ftp://ftp.ncbi.nlm.nih.gov/genomes/all/GCA/002/661/595/GCA_002661595.1_ASM266159v1								ftp://ftp.ncbi.nlm.nih.gov/genomes/all/GCF/001/922/225/GCF_001922225.1_ASM192222v1
ftp://ftp.ncbi.nlm.nih.gov/genomes/all/GCA/002/661/615/GCA_002661615.1_ASM266161v1								ftp://ftp.ncbi.nlm.nih.gov/genomes/all/GCF/001/922/245/GCF_001922245.1_ASM192224v1
ftp://ftp.ncbi.nlm.nih.gov/genomes/all/GCA/002/661/635/GCA_002661635.1_ASM266163v1								ftp://ftp.ncbi.nlm.nih.gov/genomes/all/GCF/001/941/765/GCF_001941765.1_ASM194176v1
ftp://ftp.ncbi.nlm.nih.gov/genomes/all/GCA/002/661/655/GCA_002661655.1_ASM266165v1								ftp://ftp.ncbi.nlm.nih.gov/genomes/all/GCF/002/082/625/GCF_002082625.1_ASM208262v1
ftp://ftp.ncbi.nlm.nih.gov/genomes/all/GCA/002/661/675/GCA_002661675.1_ASM266167v1								ftp://ftp.ncbi.nlm.nih.gov/genomes/all/GCF/002/082/645/GCF_002082645.1_ASM208264v1
ftp://ftp.ncbi.nlm.nih.gov/genomes/all/GCA/002/661/695/GCA_002661695.1_ASM266169v1								ftp://ftp.ncbi.nlm.nih.gov/genomes/all/GCF/002/082/685/GCF_002082685.1_ASM208268v1
ftp://ftp.ncbi.nlm.nih.gov/genomes/all/GCA/002/661/715/GCA_002661715.1_ASM266171v1								ftp://ftp.ncbi.nlm.nih.gov/genomes/all/GCF/002/082/705/GCF_002082705.1_ASM208270v1
ftp://ftp.ncbi.nlm.nih.gov/genomes/all/GCA/002/661/735/GCA_002661735.1_ASM266173v1								ftp://ftp.ncbi.nlm.nih.gov/genomes/all/GCF/002/082/725/GCF_002082725.1_ASM208272v1
ftp://ftp.ncbi.nlm.nih.gov/genomes/all/GCA/002/661/775/GCA_002661775.1_ASM266177v1								ftp://ftp.ncbi.nlm.nih.gov/genomes/all/GCF/002/082/745/GCF_002082745.1_ASM208274v1
ftp://ftp.ncbi.nlm.nih.gov/genomes/all/GCA/002/661/795/GCA_002661795.1_ASM266179v1								ftp://ftp.ncbi.nlm.nih.gov/genomes/all/GCF/002/082/785/GCF_002082785.1_ASM208278v1
ftp://ftp.ncbi.nlm.nih.gov/genomes/all/GCA/002/665/295/GCA_002665295.1_ASM266529v1								ftp://ftp.ncbi.nlm.nih.gov/genomes/all/GCF/002/082/805/GCF_002082805.1_ASM208280v1
ftp://ftp.ncbi.nlm.nih.gov/genomes/all/GCA/002/665/515/GCA_002665515.1_ASM266551v1								ftp://ftp.ncbi.nlm.nih.gov/genomes/all/GCF/002/082/825/GCF_002082825.1_ASM208282v1
ftp://ftp.ncbi.nlm.nih.gov/genomes/all/GCA/002/665/755/GCA_002665755.1_ASM266575v1								ftp://ftp.ncbi.nlm.nih.gov/genomes/all/GCF/002/082/845/GCF_002082845.1_ASM208284v1
ftp://ftp.ncbi.nlm.nih.gov/genomes/all/GCA/002/665/975/GCA_002665975.1_ASM266597v1								ftp://ftp.ncbi.nlm.nih.gov/genomes/all/GCF/002/082/865/GCF_002082865.1_ASM208286v1
ftp://ftp.ncbi.nlm.nih.gov/genomes/all/GCA/002/666/075/GCA_002666075.1_ASM266607v1								ftp://ftp.ncbi.nlm.nih.gov/genomes/all/GCF/002/082/885/GCF_002082885.1_ASM208288v1
ftp://ftp.ncbi.nlm.nih.gov/genomes/all/GCA/002/666/095/GCA_002666095.1_ASM266609v1								ftp://ftp.ncbi.nlm.nih.gov/genomes/all/GCF/002/116/925/GCF_002116925.1_ASM211692v1
ftp://ftp.ncbi.nlm.nih.gov/genomes/all/GCA/002/666/115/GCA_002666115.1_ASM266611v1								ftp://ftp.ncbi.nlm.nih.gov/genomes/all/GCF/002/210/065/GCF_002210065.1_ASM221006v1
ftp://ftp.ncbi.nlm.nih.gov/genomes/all/GCA/002/666/135/GCA_002666135.1_ASM266613v1								ftp://ftp.ncbi.nlm.nih.gov/genomes/all/GCF/002/504/145/GCF_002504145.1_ASM250414v1
ftp://ftp.ncbi.nlm.nih.gov/genomes/all/GCA/000/922/395/GCA_000922395.1_ViralProj259336								ftp://ftp.ncbi.nlm.nih.gov/genomes/all/GCF/002/741/415/GCF_002741415.1_ASM274141v1
ftp://ftp.ncbi.nlm.nih.gov/genomes/all/GCA/000/922/495/GCA_000922495.1_ViralProj260479								ftp://ftp.ncbi.nlm.nih.gov/genomes/all/GCF/002/753/915/GCF_002753915.1_ASM275391v1
ftp://ftp.ncbi.nlm.nih.gov/genomes/all/GCA/000/924/995/GCA_000924995.1_ViralProj266774								ftp://ftp.ncbi.nlm.nih.gov/genomes/all/GCF/002/761/575/GCF_002761575.1_ASM276157v1
ftp://ftp.ncbi.nlm.nih.gov/genomes/all/GCA/000/925/855/GCA_000925855.1_ViralProj266775								ftp://ftp.ncbi.nlm.nih.gov/genomes/all/GCF/002/762/095/GCF_002762095.1_ASM276209v1
ftp://ftp.ncbi.nlm.nih.gov/genomes/all/GCA/000/926/755/GCA_000926755.1_ViralProj266646								ftp://ftp.ncbi.nlm.nih.gov/genomes/all/GCF/002/762/115/GCF_002762115.1_ASM276211v1
ftp://ftp.ncbi.nlm.nih.gov/genomes/all/GCA/000/954/595/GCA_000954595.1_ViralProj276849								ftp://ftp.ncbi.nlm.nih.gov/genomes/all/GCF/002/762/155/GCF_002762155.1_ASM276215v1
ftp://ftp.ncbi.nlm.nih.gov/genomes/all/GCA/000/954/715/GCA_000954715.1_ViralProj276876								ftp://ftp.ncbi.nlm.nih.gov/genomes/all/GCF/002/803/025/GCF_002803025.1_ASM280302v1
ftp://ftp.ncbi.nlm.nih.gov/genomes/all/GCA/000/954/735/GCA_000954735.1_ViralProj276880								ftp://ftp.ncbi.nlm.nih.gov/genomes/all/GCF/002/843/665/GCF_002843665.1_ASM284366v1
ftp://ftp.ncbi.nlm.nih.gov/genomes/all/GCA/000/955/095/GCA_000955095.1_ViralProj276878								ftp://ftp.ncbi.nlm.nih.gov/genomes/all/GCF/002/902/885/GCF_002902885.1_ASM290288v1
ftp://ftp.ncbi.nlm.nih.gov/genomes/all/GCA/000/955/435/GCA_000955435.1_ViralProj276877								ftp://ftp.ncbi.nlm.nih.gov/genomes/all/GCF/900/088/705/GCF_900088705.1_26872B01
ftp://ftp.ncbi.nlm.nih.gov/genomes/all/GCA/000/987/735/GCA_000987735.1_ViralProj266637								ftp://ftp.ncbi.nlm.nih.gov/genomes/all/GCF/002/055/515/GCF_002055515.1_ASM205551v1
ftp://ftp.ncbi.nlm.nih.gov/genomes/all/GCA/001/501/075/GCA_001501075.1_ViralProj307715								ftp://ftp.ncbi.nlm.nih.gov/genomes/all/GCF/900/093/475/GCF_900093475.1_36734_D01_2
ftp://ftp.ncbi.nlm.nih.gov/genomes/all/GCA/001/503/555/GCA_001503555.1_ViralProj307939								ftp://ftp.ncbi.nlm.nih.gov/genomes/all/GCF/000/740/455/GCF_000740455.1_ASM74045v1
ftp://ftp.ncbi.nlm.nih.gov/genomes/all/GCA/001/503/875/GCA_001503875.1_ViralProj307842								ftp://ftp.ncbi.nlm.nih.gov/genomes/all/GCF/000/766/665/GCF_000766665.1_ASM76666v1
ftp://ftp.ncbi.nlm.nih.gov/genomes/all/GCA/001/505/815/GCA_001505815.1_ViralProj307937								ftp://ftp.ncbi.nlm.nih.gov/genomes/all/GCF/002/073/215/GCF_002073215.1_ASM207321v1
ftp://ftp.ncbi.nlm.nih.gov/genomes/all/GCA/002/756/335/GCA_002756335.1_ASM275633v1								ftp://ftp.ncbi.nlm.nih.gov/genomes/all/GCF/002/080/125/GCF_002080125.1_ASM208012v1
ftp://ftp.ncbi.nlm.nih.gov/genomes/all/GCA/000/921/595/GCA_000921595.1_ViralProj259985								ftp://ftp.ncbi.nlm.nih.gov/genomes/all/GCF/001/047/225/GCF_001047225.1_ASM104722v1
ftp://ftp.ncbi.nlm.nih.gov/genomes/all/GCA/000/928/035/GCA_000928035.1_ViralProj269770								ftp://ftp.ncbi.nlm.nih.gov/genomes/all/GCF/001/047/255/GCF_001047255.1_ASM104725v1
ftp://ftp.ncbi.nlm.nih.gov/genomes/all/GCA/002/647/455/GCA_002647455.1_ASM264745v1								ftp://ftp.ncbi.nlm.nih.gov/genomes/all/GCF/001/047/275/GCF_001047275.1_ASM104727v1
ftp://ftp.ncbi.nlm.nih.gov/genomes/all/GCA/000/924/855/GCA_000924855.1_ViralProj266640								ftp://ftp.ncbi.nlm.nih.gov/genomes/all/GCF/001/661/085/GCF_001661085.1_ASM166108v1
ftp://ftp.ncbi.nlm.nih.gov/genomes/all/GCA/002/659/795/GCA_002659795.1_ASM265979v1								ftp://ftp.ncbi.nlm.nih.gov/genomes/all/GCF/001/661/115/GCF_001661115.1_ASM166111v1
ftp://ftp.ncbi.nlm.nih.gov/genomes/all/GCA/000/925/775/GCA_000925775.1_ViralProj266716								ftp://ftp.ncbi.nlm.nih.gov/genomes/all/GCF/001/661/135/GCF_001661135.1_ASM166113v1
ftp://ftp.ncbi.nlm.nih.gov/genomes/all/GCA/000/926/875/GCA_000926875.1_ViralProj266772								ftp://ftp.ncbi.nlm.nih.gov/genomes/all/GCF/002/073/535/GCF_002073535.1_ASM207353v1
ftp://ftp.ncbi.nlm.nih.gov/genomes/all/GCA/000/927/415/GCA_000927415.1_ViralProj266714								ftp://ftp.ncbi.nlm.nih.gov/genomes/all/GCF/002/073/615/GCF_002073615.1_ASM207361v1
ftp://ftp.ncbi.nlm.nih.gov/genomes/all/GCA/000/927/475/GCA_000927475.1_ViralProj266769								ftp://ftp.ncbi.nlm.nih.gov/genomes/all/GCF/002/073/655/GCF_002073655.1_ASM207365v1
ftp://ftp.ncbi.nlm.nih.gov/genomes/all/GCA/000/927/495/GCA_000927495.1_ViralProj266773								ftp://ftp.ncbi.nlm.nih.gov/genomes/all/GCF/900/186/875/GCF_900186875.1_49677_F01
ftp://ftp.ncbi.nlm.nih.gov/genomes/all/GCA/000/929/095/GCA_000929095.1_ViralProj271783								ftp://ftp.ncbi.nlm.nih.gov/genomes/all/GCF/900/186/915/GCF_900186915.1_49699_A01
ftp://ftp.ncbi.nlm.nih.gov/genomes/all/GCA/000/929/595/GCA_000929595.1_ViralProj267261								ftp://ftp.ncbi.nlm.nih.gov/genomes/all/GCF/900/186/935/GCF_900186935.1_49677_G01
ftp://ftp.ncbi.nlm.nih.gov/genomes/all/GCA/000/954/375/GCA_000954375.1_ViralProj276879								ftp://ftp.ncbi.nlm.nih.gov/genomes/all/GCF/002/022/745/GCF_002022745.1_ASM202274v1
ftp://ftp.ncbi.nlm.nih.gov/genomes/all/GCA/000/955/075/GCA_000955075.1_ViralProj276874								ftp://ftp.ncbi.nlm.nih.gov/genomes/all/GCF/000/626/595/GCF_000626595.1_ASM62659v1
ftp://ftp.ncbi.nlm.nih.gov/genomes/all/GCA/001/040/815/GCA_001040815.1_ViralProj287862								ftp://ftp.ncbi.nlm.nih.gov/genomes/all/GCF/000/787/195/GCF_000787195.2_ASM78719v2
ftp://ftp.ncbi.nlm.nih.gov/genomes/all/GCA/001/041/375/GCA_001041375.1_ViralProj287958								ftp://ftp.ncbi.nlm.nih.gov/genomes/all/GCF/000/800/235/GCF_000800235.1_ASM80023v1
ftp://ftp.ncbi.nlm.nih.gov/genomes/all/GCA/000/955/015/GCA_000955015.2_ViralProj276862								ftp://ftp.ncbi.nlm.nih.gov/genomes/all/GCF/000/800/275/GCF_000800275.1_ASM80027v1
ftp://ftp.ncbi.nlm.nih.gov/genomes/all/GCA/001/470/415/GCA_001470415.1_ViralProj306300								ftp://ftp.ncbi.nlm.nih.gov/genomes/all/GCF/000/800/315/GCF_000800315.1_ASM80031v1
ftp://ftp.ncbi.nlm.nih.gov/genomes/all/GCA/000/925/755/GCA_000925755.1_ViralProj266712								ftp://ftp.ncbi.nlm.nih.gov/genomes/all/GCF/000/800/355/GCF_000800355.1_ASM80035v1
ftp://ftp.ncbi.nlm.nih.gov/genomes/all/GCA/000/925/835/GCA_000925835.1_ViralProj266771								ftp://ftp.ncbi.nlm.nih.gov/genomes/all/GCF/000/800/415/GCF_000800415.1_ASM80041v1
ftp://ftp.ncbi.nlm.nih.gov/genomes/all/GCA/000/926/795/GCA_000926795.1_ViralProj266713								ftp://ftp.ncbi.nlm.nih.gov/genomes/all/GCF/000/816/165/GCF_000816165.1_ASM81616v1
ftp://ftp.ncbi.nlm.nih.gov/genomes/all/GCA/000/954/355/GCA_000954355.1_ViralProj276875								ftp://ftp.ncbi.nlm.nih.gov/genomes/all/GCF/001/029/815/GCF_001029815.1_ASM102981v1
ftp://ftp.ncbi.nlm.nih.gov/genomes/all/GCA/001/500/415/GCA_001500415.1_ViralProj307714								ftp://ftp.ncbi.nlm.nih.gov/genomes/all/GCF/001/029/835/GCF_001029835.1_ASM102983v1
ftp://ftp.ncbi.nlm.nih.gov/genomes/all/GCA/001/501/835/GCA_001501835.1_ViralProj307712								ftp://ftp.ncbi.nlm.nih.gov/genomes/all/GCF/001/697/105/GCF_001697105.1_ASM169710v1
ftp://ftp.ncbi.nlm.nih.gov/genomes/all/GCA/001/502/455/GCA_001502455.1_ViralProj307713								ftp://ftp.ncbi.nlm.nih.gov/genomes/all/GCF/001/697/125/GCF_001697125.1_ASM169712v1
ftp://ftp.ncbi.nlm.nih.gov/genomes/all/GCA/001/505/795/GCA_001505795.1_ViralProj307933								ftp://ftp.ncbi.nlm.nih.gov/genomes/all/GCF/001/697/165/GCF_001697165.1_ASM169716v1
ftp://ftp.ncbi.nlm.nih.gov/genomes/all/GCA/002/601/285/GCA_002601285.1_ASM260128v1								ftp://ftp.ncbi.nlm.nih.gov/genomes/all/GCF/001/697/205/GCF_001697205.1_ASM169720v1
ftp://ftp.ncbi.nlm.nih.gov/genomes/all/GCA/002/604/905/GCA_002604905.1_ASM260490v1								ftp://ftp.ncbi.nlm.nih.gov/genomes/all/GCF/001/697/305/GCF_001697305.1_ASM169730v1
ftp://ftp.ncbi.nlm.nih.gov/genomes/all/GCA/002/600/285/GCA_002600285.1_ASM260028v1								ftp://ftp.ncbi.nlm.nih.gov/genomes/all/GCF/001/697/325/GCF_001697325.1_ASM169732v1
ftp://ftp.ncbi.nlm.nih.gov/genomes/all/GCA/002/756/375/GCA_002756375.1_ASM275637v1								ftp://ftp.ncbi.nlm.nih.gov/genomes/all/GCF/001/697/345/GCF_001697345.1_ASM169734v1
ftp://ftp.ncbi.nlm.nih.gov/genomes/all/GCA/001/501/695/GCA_001501695.1_ViralProj307843								ftp://ftp.ncbi.nlm.nih.gov/genomes/all/GCF/001/697/365/GCF_001697365.1_ASM169736v1
ftp://ftp.ncbi.nlm.nih.gov/genomes/all/GCA/001/550/945/GCA_001550945.1_ViralProj310911								ftp://ftp.ncbi.nlm.nih.gov/genomes/all/GCF/001/697/385/GCF_001697385.1_ASM169738v1
ftp://ftp.ncbi.nlm.nih.gov/genomes/all/GCA/000/925/035/GCA_000925035.1_ViralProj266782								ftp://ftp.ncbi.nlm.nih.gov/genomes/all/GCF/001/697/405/GCF_001697405.1_ASM169740v1
ftp://ftp.ncbi.nlm.nih.gov/genomes/all/GCA/000/925/875/GCA_000925875.1_ViralProj266779								ftp://ftp.ncbi.nlm.nih.gov/genomes/all/GCF/001/697/425/GCF_001697425.1_ASM169742v1
ftp://ftp.ncbi.nlm.nih.gov/genomes/all/GCA/000/927/535/GCA_000927535.1_ViralProj266781								ftp://ftp.ncbi.nlm.nih.gov/genomes/all/GCF/001/697/445/GCF_001697445.1_ASM169744v1
ftp://ftp.ncbi.nlm.nih.gov/genomes/all/GCA/000/927/595/GCA_000927595.1_ViralProj266988								ftp://ftp.ncbi.nlm.nih.gov/genomes/all/GCF/001/697/465/GCF_001697465.1_ASM169746v1
ftp://ftp.ncbi.nlm.nih.gov/genomes/all/GCA/000/929/495/GCA_000929495.1_ViralProj266780								ftp://ftp.ncbi.nlm.nih.gov/genomes/all/GCF/001/697/485/GCF_001697485.1_ASM169748v1
ftp://ftp.ncbi.nlm.nih.gov/genomes/all/GCA/002/604/425/GCA_002604425.1_ASM260442v1								ftp://ftp.ncbi.nlm.nih.gov/genomes/all/GCF/001/697/505/GCF_001697505.1_ASM169750v1
ftp://ftp.ncbi.nlm.nih.gov/genomes/all/GCA/002/756/315/GCA_002756315.1_ASM275631v1								ftp://ftp.ncbi.nlm.nih.gov/genomes/all/GCF/001/697/525/GCF_001697525.1_ASM169752v1
ftp://ftp.ncbi.nlm.nih.gov/genomes/all/GCA/001/041/875/GCA_001041875.1_ViralProj287991								ftp://ftp.ncbi.nlm.nih.gov/genomes/all/GCF/001/697/545/GCF_001697545.1_ASM169754v1
ftp://ftp.ncbi.nlm.nih.gov/genomes/all/GCA/000/926/255/GCA_000926255.2_ViralProj263031								ftp://ftp.ncbi.nlm.nih.gov/genomes/all/GCF/001/697/565/GCF_001697565.1_ASM169756v1
ftp://ftp.ncbi.nlm.nih.gov/genomes/all/GCA/000/924/415/GCA_000924415.1_ViralProj263092								ftp://ftp.ncbi.nlm.nih.gov/genomes/all/GCF/001/697/585/GCF_001697585.1_ASM169758v1
ftp://ftp.ncbi.nlm.nih.gov/genomes/all/GCA/000/927/975/GCA_000927975.1_ViralProj269306								ftp://ftp.ncbi.nlm.nih.gov/genomes/all/GCF/001/697/605/GCF_001697605.1_ASM169760v1
ftp://ftp.ncbi.nlm.nih.gov/genomes/all/GCA/000/926/975/GCA_000926975.1_ViralProj263990								ftp://ftp.ncbi.nlm.nih.gov/genomes/all/GCF/001/697/625/GCF_001697625.1_ASM169762v1
ftp://ftp.ncbi.nlm.nih.gov/genomes/all/GCA/002/593/025/GCA_002593025.1_ASM259302v1								ftp://ftp.ncbi.nlm.nih.gov/genomes/all/GCF/001/697/645/GCF_001697645.1_ASM169764v1
ftp://ftp.ncbi.nlm.nih.gov/genomes/all/GCA/002/593/045/GCA_002593045.1_ASM259304v1								ftp://ftp.ncbi.nlm.nih.gov/genomes/all/GCF/001/697/665/GCF_001697665.1_ASM169766v1
ftp://ftp.ncbi.nlm.nih.gov/genomes/all/GCA/002/593/065/GCA_002593065.1_ASM259306v1								ftp://ftp.ncbi.nlm.nih.gov/genomes/all/GCF/001/697/685/GCF_001697685.1_ASM169768v1
ftp://ftp.ncbi.nlm.nih.gov/genomes/all/GCA/000/927/435/GCA_000927435.1_ViralProj266718								ftp://ftp.ncbi.nlm.nih.gov/genomes/all/GCF/001/697/705/GCF_001697705.1_ASM169770v1
ftp://ftp.ncbi.nlm.nih.gov/genomes/all/GCA/000/930/595/GCA_000930595.1_ViralProj269769								ftp://ftp.ncbi.nlm.nih.gov/genomes/all/GCF/001/697/725/GCF_001697725.1_ASM169772v1
ftp://ftp.ncbi.nlm.nih.gov/genomes/all/GCA/001/505/835/GCA_001505835.1_ViralProj307941								ftp://ftp.ncbi.nlm.nih.gov/genomes/all/GCF/001/697/745/GCF_001697745.1_ASM169774v1
ftp://ftp.ncbi.nlm.nih.gov/genomes/all/GCA/001/551/105/GCA_001551105.1_ViralProj310943								ftp://ftp.ncbi.nlm.nih.gov/genomes/all/GCF/001/697/765/GCF_001697765.1_ASM169776v1
ftp://ftp.ncbi.nlm.nih.gov/genomes/all/GCA/002/605/005/GCA_002605005.1_ASM260500v1								ftp://ftp.ncbi.nlm.nih.gov/genomes/all/GCF/001/697/785/GCF_001697785.1_ASM169778v1
ftp://ftp.ncbi.nlm.nih.gov/genomes/all/GCA/002/605/025/GCA_002605025.1_ASM260502v1								ftp://ftp.ncbi.nlm.nih.gov/genomes/all/GCF/001/697/805/GCF_001697805.1_ASM169780v1
ftp://ftp.ncbi.nlm.nih.gov/genomes/all/GCA/000/925/815/GCA_000925815.1_ViralProj266767								ftp://ftp.ncbi.nlm.nih.gov/genomes/all/GCF/001/697/825/GCF_001697825.1_ASM169782v1
ftp://ftp.ncbi.nlm.nih.gov/genomes/all/GCA/000/926/335/GCA_000926335.1_ViralProj263949								ftp://ftp.ncbi.nlm.nih.gov/genomes/all/GCF/001/697/845/GCF_001697845.1_ASM169784v1
ftp://ftp.ncbi.nlm.nih.gov/genomes/all/GCA/000/926/855/GCA_000926855.1_ViralProj266768								ftp://ftp.ncbi.nlm.nih.gov/genomes/all/GCF/001/697/865/GCF_001697865.1_ASM169786v1
ftp://ftp.ncbi.nlm.nih.gov/genomes/all/GCA/001/501/035/GCA_001501035.1_ViralProj307707								ftp://ftp.ncbi.nlm.nih.gov/genomes/all/GCF/001/697/885/GCF_001697885.1_ASM169788v1
ftp://ftp.ncbi.nlm.nih.gov/genomes/all/GCA/001/501/815/GCA_001501815.1_ViralProj307708								ftp://ftp.ncbi.nlm.nih.gov/genomes/all/GCF/001/697/905/GCF_001697905.1_ASM169790v1
ftp://ftp.ncbi.nlm.nih.gov/genomes/all/GCA/001/502/435/GCA_001502435.1_ViralProj307709								ftp://ftp.ncbi.nlm.nih.gov/genomes/all/GCF/001/697/925/GCF_001697925.1_ASM169792v1
ftp://ftp.ncbi.nlm.nih.gov/genomes/all/GCA/001/505/995/GCA_001505995.1_ViralProj307973								ftp://ftp.ncbi.nlm.nih.gov/genomes/all/GCF/001/697/945/GCF_001697945.1_ASM169794v1
ftp://ftp.ncbi.nlm.nih.gov/genomes/all/GCA/001/517/015/GCA_001517015.1_ViralProj308859								ftp://ftp.ncbi.nlm.nih.gov/genomes/all/GCF/001/697/965/GCF_001697965.1_ASM169796v1
ftp://ftp.ncbi.nlm.nih.gov/genomes/all/GCA/002/605/065/GCA_002605065.1_ASM260506v1								ftp://ftp.ncbi.nlm.nih.gov/genomes/all/GCF/001/697/985/GCF_001697985.1_ASM169798v1
ftp://ftp.ncbi.nlm.nih.gov/genomes/all/GCA/002/634/935/GCA_002634935.1_ASM263493v1								ftp://ftp.ncbi.nlm.nih.gov/genomes/all/GCF/001/698/005/GCF_001698005.1_ASM169800v1
ftp://ftp.ncbi.nlm.nih.gov/genomes/all/GCA/002/636/535/GCA_002636535.1_ASM263653v1								ftp://ftp.ncbi.nlm.nih.gov/genomes/all/GCF/001/698/025/GCF_001698025.1_ASM169802v1
ftp://ftp.ncbi.nlm.nih.gov/genomes/all/GCA/002/636/555/GCA_002636555.1_ASM263655v1								ftp://ftp.ncbi.nlm.nih.gov/genomes/all/GCF/001/698/045/GCF_001698045.1_ASM169804v1
ftp://ftp.ncbi.nlm.nih.gov/genomes/all/GCA/002/636/575/GCA_002636575.1_ASM263657v1								ftp://ftp.ncbi.nlm.nih.gov/genomes/all/GCF/001/698/065/GCF_001698065.1_ASM169806v1
ftp://ftp.ncbi.nlm.nih.gov/genomes/all/GCA/002/636/595/GCA_002636595.1_ASM263659v1								ftp://ftp.ncbi.nlm.nih.gov/genomes/all/GCF/001/698/085/GCF_001698085.1_ASM169808v1
ftp://ftp.ncbi.nlm.nih.gov/genomes/all/GCA/002/636/635/GCA_002636635.1_ASM263663v1								ftp://ftp.ncbi.nlm.nih.gov/genomes/all/GCF/001/698/105/GCF_001698105.1_ASM169810v1
ftp://ftp.ncbi.nlm.nih.gov/genomes/all/GCA/002/636/655/GCA_002636655.1_ASM263665v1								ftp://ftp.ncbi.nlm.nih.gov/genomes/all/GCF/001/750/825/GCF_001750825.1_ASM175082v1
ftp://ftp.ncbi.nlm.nih.gov/genomes/all/GCA/002/636/675/GCA_002636675.1_ASM263667v1								ftp://ftp.ncbi.nlm.nih.gov/genomes/all/GCF/001/974/965/GCF_001974965.1_ASM197496v1
ftp://ftp.ncbi.nlm.nih.gov/genomes/all/GCA/002/636/695/GCA_002636695.1_ASM263669v1								ftp://ftp.ncbi.nlm.nih.gov/genomes/all/GCF/002/073/235/GCF_002073235.1_ASM207323v1
ftp://ftp.ncbi.nlm.nih.gov/genomes/all/GCA/002/636/715/GCA_002636715.1_ASM263671v1								ftp://ftp.ncbi.nlm.nih.gov/genomes/all/GCF/002/073/275/GCF_002073275.1_ASM207327v1
ftp://ftp.ncbi.nlm.nih.gov/genomes/all/GCA/002/636/735/GCA_002636735.1_ASM263673v1								ftp://ftp.ncbi.nlm.nih.gov/genomes/all/GCF/002/073/555/GCF_002073555.1_ASM207355v1
ftp://ftp.ncbi.nlm.nih.gov/genomes/all/GCA/002/636/755/GCA_002636755.1_ASM263675v1								ftp://ftp.ncbi.nlm.nih.gov/genomes/all/GCF/002/073/595/GCF_002073595.1_ASM207359v1
ftp://ftp.ncbi.nlm.nih.gov/genomes/all/GCA/002/636/775/GCA_002636775.1_ASM263677v1								ftp://ftp.ncbi.nlm.nih.gov/genomes/all/GCF/002/073/675/GCF_002073675.1_ASM207367v1
ftp://ftp.ncbi.nlm.nih.gov/genomes/all/GCA/002/636/795/GCA_002636795.1_ASM263679v1								ftp://ftp.ncbi.nlm.nih.gov/genomes/all/GCF/002/075/815/GCF_002075815.1_ASM207581v1
ftp://ftp.ncbi.nlm.nih.gov/genomes/all/GCA/002/636/815/GCA_002636815.1_ASM263681v1								ftp://ftp.ncbi.nlm.nih.gov/genomes/all/GCF/002/556/585/GCF_002556585.1_ASM255658v1
ftp://ftp.ncbi.nlm.nih.gov/genomes/all/GCA/002/636/875/GCA_002636875.1_ASM263687v1								ftp://ftp.ncbi.nlm.nih.gov/genomes/all/GCF/002/073/715/GCF_002073715.1_ASM207371v1
ftp://ftp.ncbi.nlm.nih.gov/genomes/all/GCA/002/636/895/GCA_002636895.1_ASM263689v1								ftp://ftp.ncbi.nlm.nih.gov/genomes/all/GCF/000/818/035/GCF_000818035.1_ASM81803v1
ftp://ftp.ncbi.nlm.nih.gov/genomes/all/GCA/002/636/915/GCA_002636915.1_ASM263691v1								ftp://ftp.ncbi.nlm.nih.gov/genomes/all/GCF/000/967/305/GCF_000967305.2_ASM96730v2
ftp://ftp.ncbi.nlm.nih.gov/genomes/all/GCA/002/636/935/GCA_002636935.1_ASM263693v1								ftp://ftp.ncbi.nlm.nih.gov/genomes/all/GCF/001/641/975/GCF_001641975.2_ASM164197v2
ftp://ftp.ncbi.nlm.nih.gov/genomes/all/GCA/002/636/955/GCA_002636955.1_ASM263695v1								ftp://ftp.ncbi.nlm.nih.gov/genomes/all/GCF/002/242/175/GCF_002242175.1_ASM224217v1
ftp://ftp.ncbi.nlm.nih.gov/genomes/all/GCA/002/636/975/GCA_002636975.1_ASM263697v1								ftp://ftp.ncbi.nlm.nih.gov/genomes/all/GCF/002/443/155/GCF_002443155.1_ASM244315v1
ftp://ftp.ncbi.nlm.nih.gov/genomes/all/GCA/002/636/995/GCA_002636995.1_ASM263699v1								ftp://ftp.ncbi.nlm.nih.gov/genomes/all/GCF/000/829/175/GCF_000829175.1_ASM82917v1
ftp://ftp.ncbi.nlm.nih.gov/genomes/all/GCA/002/637/015/GCA_002637015.1_ASM263701v1								ftp://ftp.ncbi.nlm.nih.gov/genomes/all/GCF/001/704/355/GCF_001704355.1_ASM170435v1
ftp://ftp.ncbi.nlm.nih.gov/genomes/all/GCA/002/637/035/GCA_002637035.1_ASM263703v1								ftp://ftp.ncbi.nlm.nih.gov/genomes/all/GCF/002/859/225/GCF_002859225.1_ASM285922v1
ftp://ftp.ncbi.nlm.nih.gov/genomes/all/GCA/002/637/055/GCA_002637055.1_ASM263705v1								ftp://ftp.ncbi.nlm.nih.gov/genomes/all/GCF/001/704/255/GCF_001704255.1_ASM170425v1
ftp://ftp.ncbi.nlm.nih.gov/genomes/all/GCA/002/637/095/GCA_002637095.1_ASM263709v1								ftp://ftp.ncbi.nlm.nih.gov/genomes/all/GCF/002/859/965/GCF_002859965.1_ASM285996v1
ftp://ftp.ncbi.nlm.nih.gov/genomes/all/GCA/002/637/115/GCA_002637115.1_ASM263711v1								ftp://ftp.ncbi.nlm.nih.gov/genomes/all/GCF/000/193/595/GCF_000193595.2_ASM19359v3
ftp://ftp.ncbi.nlm.nih.gov/genomes/all/GCA/002/637/135/GCA_002637135.1_ASM263713v1								ftp://ftp.ncbi.nlm.nih.gov/genomes/all/GCF/000/812/165/GCF_000812165.1_ASM81216v1
ftp://ftp.ncbi.nlm.nih.gov/genomes/all/GCA/002/637/155/GCA_002637155.1_ASM263715v1								ftp://ftp.ncbi.nlm.nih.gov/genomes/all/GCF/001/013/565/GCF_001013565.1_BPD420
ftp://ftp.ncbi.nlm.nih.gov/genomes/all/GCA/002/637/175/GCA_002637175.1_ASM263717v1								ftp://ftp.ncbi.nlm.nih.gov/genomes/all/GCF/001/307/525/GCF_001307525.1_ASM130752v1
ftp://ftp.ncbi.nlm.nih.gov/genomes/all/GCA/002/637/195/GCA_002637195.1_ASM263719v1								ftp://ftp.ncbi.nlm.nih.gov/genomes/all/GCF/001/307/565/GCF_001307565.1_ASM130756v1
ftp://ftp.ncbi.nlm.nih.gov/genomes/all/GCA/002/637/215/GCA_002637215.1_ASM263721v1								ftp://ftp.ncbi.nlm.nih.gov/genomes/all/GCF/001/307/585/GCF_001307585.1_ASM130758v1
ftp://ftp.ncbi.nlm.nih.gov/genomes/all/GCA/002/637/235/GCA_002637235.1_ASM263723v1								ftp://ftp.ncbi.nlm.nih.gov/genomes/all/GCF/001/307/605/GCF_001307605.1_ASM130760v1
ftp://ftp.ncbi.nlm.nih.gov/genomes/all/GCA/002/637/255/GCA_002637255.1_ASM263725v1								ftp://ftp.ncbi.nlm.nih.gov/genomes/all/GCF/001/307/625/GCF_001307625.1_ASM130762v1
ftp://ftp.ncbi.nlm.nih.gov/genomes/all/GCA/002/637/275/GCA_002637275.1_ASM263727v1								ftp://ftp.ncbi.nlm.nih.gov/genomes/all/GCF/001/307/645/GCF_001307645.1_ASM130764v1
ftp://ftp.ncbi.nlm.nih.gov/genomes/all/GCA/002/637/315/GCA_002637315.1_ASM263731v1								ftp://ftp.ncbi.nlm.nih.gov/genomes/all/GCF/001/307/665/GCF_001307665.1_ASM130766v1
ftp://ftp.ncbi.nlm.nih.gov/genomes/all/GCA/002/637/335/GCA_002637335.1_ASM263733v1								ftp://ftp.ncbi.nlm.nih.gov/genomes/all/GCF/001/307/685/GCF_001307685.1_ASM130768v1
ftp://ftp.ncbi.nlm.nih.gov/genomes/all/GCA/002/637/355/GCA_002637355.1_ASM263735v1								ftp://ftp.ncbi.nlm.nih.gov/genomes/all/GCF/001/307/705/GCF_001307705.1_ASM130770v1
ftp://ftp.ncbi.nlm.nih.gov/genomes/all/GCA/002/637/375/GCA_002637375.1_ASM263737v1								ftp://ftp.ncbi.nlm.nih.gov/genomes/all/GCF/001/307/725/GCF_001307725.1_ASM130772v1
ftp://ftp.ncbi.nlm.nih.gov/genomes/all/GCA/002/637/395/GCA_002637395.1_ASM263739v1								ftp://ftp.ncbi.nlm.nih.gov/genomes/all/GCF/001/307/745/GCF_001307745.1_ASM130774v1
ftp://ftp.ncbi.nlm.nih.gov/genomes/all/GCA/002/637/415/GCA_002637415.1_ASM263741v1								ftp://ftp.ncbi.nlm.nih.gov/genomes/all/GCF/001/509/895/GCF_001509895.1_ASM150989v1
ftp://ftp.ncbi.nlm.nih.gov/genomes/all/GCA/002/637/435/GCA_002637435.1_ASM263743v1								ftp://ftp.ncbi.nlm.nih.gov/genomes/all/GCF/001/509/915/GCF_001509915.1_ASM150991v1
ftp://ftp.ncbi.nlm.nih.gov/genomes/all/GCA/002/637/455/GCA_002637455.1_ASM263745v1								ftp://ftp.ncbi.nlm.nih.gov/genomes/all/GCF/001/605/035/GCF_001605035.1_ASM160503v1
ftp://ftp.ncbi.nlm.nih.gov/genomes/all/GCA/002/637/475/GCA_002637475.1_ASM263747v1								ftp://ftp.ncbi.nlm.nih.gov/genomes/all/GCF/001/605/055/GCF_001605055.1_ASM160505v1
ftp://ftp.ncbi.nlm.nih.gov/genomes/all/GCA/002/637/495/GCA_002637495.1_ASM263749v1								ftp://ftp.ncbi.nlm.nih.gov/genomes/all/GCF/001/605/075/GCF_001605075.1_ASM160507v1
ftp://ftp.ncbi.nlm.nih.gov/genomes/all/GCA/002/637/535/GCA_002637535.1_ASM263753v1								ftp://ftp.ncbi.nlm.nih.gov/genomes/all/GCF/001/605/095/GCF_001605095.1_ASM160509v1
ftp://ftp.ncbi.nlm.nih.gov/genomes/all/GCA/002/637/555/GCA_002637555.1_ASM263755v1								ftp://ftp.ncbi.nlm.nih.gov/genomes/all/GCF/001/605/115/GCF_001605115.1_ASM160511v1
ftp://ftp.ncbi.nlm.nih.gov/genomes/all/GCA/002/637/575/GCA_002637575.1_ASM263757v1								ftp://ftp.ncbi.nlm.nih.gov/genomes/all/GCF/001/605/135/GCF_001605135.1_ASM160513v1
ftp://ftp.ncbi.nlm.nih.gov/genomes/all/GCA/002/637/595/GCA_002637595.1_ASM263759v1								ftp://ftp.ncbi.nlm.nih.gov/genomes/all/GCF/001/605/155/GCF_001605155.1_ASM160515v1
ftp://ftp.ncbi.nlm.nih.gov/genomes/all/GCA/002/637/615/GCA_002637615.1_ASM263761v1								ftp://ftp.ncbi.nlm.nih.gov/genomes/all/GCF/001/605/175/GCF_001605175.1_ASM160517v1
ftp://ftp.ncbi.nlm.nih.gov/genomes/all/GCA/002/637/635/GCA_002637635.1_ASM263763v1								ftp://ftp.ncbi.nlm.nih.gov/genomes/all/GCF/001/605/195/GCF_001605195.1_ASM160519v1
ftp://ftp.ncbi.nlm.nih.gov/genomes/all/GCA/002/637/655/GCA_002637655.1_ASM263765v1								ftp://ftp.ncbi.nlm.nih.gov/genomes/all/GCF/001/605/215/GCF_001605215.1_ASM160521v1
ftp://ftp.ncbi.nlm.nih.gov/genomes/all/GCA/002/637/675/GCA_002637675.1_ASM263767v1								ftp://ftp.ncbi.nlm.nih.gov/genomes/all/GCF/001/605/235/GCF_001605235.1_ASM160523v1
ftp://ftp.ncbi.nlm.nih.gov/genomes/all/GCA/002/637/695/GCA_002637695.1_ASM263769v1								ftp://ftp.ncbi.nlm.nih.gov/genomes/all/GCF/001/605/255/GCF_001605255.1_ASM160525v1
ftp://ftp.ncbi.nlm.nih.gov/genomes/all/GCA/002/637/715/GCA_002637715.1_ASM263771v1								ftp://ftp.ncbi.nlm.nih.gov/genomes/all/GCF/001/605/275/GCF_001605275.1_ASM160527v1
ftp://ftp.ncbi.nlm.nih.gov/genomes/all/GCA/002/637/755/GCA_002637755.1_ASM263775v1								ftp://ftp.ncbi.nlm.nih.gov/genomes/all/GCF/001/605/295/GCF_001605295.1_ASM160529v1
ftp://ftp.ncbi.nlm.nih.gov/genomes/all/GCA/002/637/775/GCA_002637775.1_ASM263777v1								ftp://ftp.ncbi.nlm.nih.gov/genomes/all/GCF/001/605/345/GCF_001605345.1_ASM160534v1
ftp://ftp.ncbi.nlm.nih.gov/genomes/all/GCA/002/637/795/GCA_002637795.1_ASM263779v1								ftp://ftp.ncbi.nlm.nih.gov/genomes/all/GCF/001/605/365/GCF_001605365.1_ASM160536v1
ftp://ftp.ncbi.nlm.nih.gov/genomes/all/GCA/002/637/815/GCA_002637815.1_ASM263781v1								ftp://ftp.ncbi.nlm.nih.gov/genomes/all/GCF/001/605/385/GCF_001605385.1_ASM160538v1
ftp://ftp.ncbi.nlm.nih.gov/genomes/all/GCA/002/637/835/GCA_002637835.1_ASM263783v1								ftp://ftp.ncbi.nlm.nih.gov/genomes/all/GCF/001/605/405/GCF_001605405.1_ASM160540v1
ftp://ftp.ncbi.nlm.nih.gov/genomes/all/GCA/002/637/855/GCA_002637855.1_ASM263785v1								ftp://ftp.ncbi.nlm.nih.gov/genomes/all/GCF/001/605/425/GCF_001605425.1_ASM160542v1
ftp://ftp.ncbi.nlm.nih.gov/genomes/all/GCA/002/637/875/GCA_002637875.1_ASM263787v1								ftp://ftp.ncbi.nlm.nih.gov/genomes/all/GCF/001/605/445/GCF_001605445.1_ASM160544v1
ftp://ftp.ncbi.nlm.nih.gov/genomes/all/GCA/002/637/895/GCA_002637895.1_ASM263789v1								ftp://ftp.ncbi.nlm.nih.gov/genomes/all/GCF/001/605/465/GCF_001605465.1_ASM160546v1
ftp://ftp.ncbi.nlm.nih.gov/genomes/all/GCA/002/637/915/GCA_002637915.1_ASM263791v1								ftp://ftp.ncbi.nlm.nih.gov/genomes/all/GCF/001/605/485/GCF_001605485.1_ASM160548v1
ftp://ftp.ncbi.nlm.nih.gov/genomes/all/GCA/002/637/935/GCA_002637935.1_ASM263793v1								ftp://ftp.ncbi.nlm.nih.gov/genomes/all/GCF/001/605/505/GCF_001605505.1_ASM160550v1
ftp://ftp.ncbi.nlm.nih.gov/genomes/all/GCA/002/637/975/GCA_002637975.1_ASM263797v1								ftp://ftp.ncbi.nlm.nih.gov/genomes/all/GCF/001/605/525/GCF_001605525.1_ASM160552v1
ftp://ftp.ncbi.nlm.nih.gov/genomes/all/GCA/002/637/995/GCA_002637995.1_ASM263799v1								ftp://ftp.ncbi.nlm.nih.gov/genomes/all/GCF/001/605/545/GCF_001605545.1_ASM160554v1
ftp://ftp.ncbi.nlm.nih.gov/genomes/all/GCA/002/638/015/GCA_002638015.1_ASM263801v1								ftp://ftp.ncbi.nlm.nih.gov/genomes/all/GCF/001/605/565/GCF_001605565.1_ASM160556v1
ftp://ftp.ncbi.nlm.nih.gov/genomes/all/GCA/002/638/035/GCA_002638035.1_ASM263803v1								ftp://ftp.ncbi.nlm.nih.gov/genomes/all/GCF/001/605/585/GCF_001605585.1_ASM160558v1
ftp://ftp.ncbi.nlm.nih.gov/genomes/all/GCA/002/638/055/GCA_002638055.1_ASM263805v1								ftp://ftp.ncbi.nlm.nih.gov/genomes/all/GCF/001/605/605/GCF_001605605.1_ASM160560v1
ftp://ftp.ncbi.nlm.nih.gov/genomes/all/GCA/002/638/075/GCA_002638075.1_ASM263807v1								ftp://ftp.ncbi.nlm.nih.gov/genomes/all/GCF/001/605/625/GCF_001605625.1_ASM160562v1
ftp://ftp.ncbi.nlm.nih.gov/genomes/all/GCA/002/638/095/GCA_002638095.1_ASM263809v1								ftp://ftp.ncbi.nlm.nih.gov/genomes/all/GCF/001/605/645/GCF_001605645.1_ASM160564v1
ftp://ftp.ncbi.nlm.nih.gov/genomes/all/GCA/002/638/115/GCA_002638115.1_ASM263811v1								ftp://ftp.ncbi.nlm.nih.gov/genomes/all/GCF/001/605/665/GCF_001605665.1_ASM160566v1
ftp://ftp.ncbi.nlm.nih.gov/genomes/all/GCA/002/638/135/GCA_002638135.1_ASM263813v1								ftp://ftp.ncbi.nlm.nih.gov/genomes/all/GCF/001/605/685/GCF_001605685.1_ASM160568v1
ftp://ftp.ncbi.nlm.nih.gov/genomes/all/GCA/002/638/155/GCA_002638155.1_ASM263815v1								ftp://ftp.ncbi.nlm.nih.gov/genomes/all/GCF/001/628/735/GCF_001628735.1_ASM162873v1
ftp://ftp.ncbi.nlm.nih.gov/genomes/all/GCA/002/638/195/GCA_002638195.1_ASM263819v1								ftp://ftp.ncbi.nlm.nih.gov/genomes/all/GCF/001/686/365/GCF_001686365.1_ASM168636v1
ftp://ftp.ncbi.nlm.nih.gov/genomes/all/GCA/002/638/215/GCA_002638215.1_ASM263821v1								ftp://ftp.ncbi.nlm.nih.gov/genomes/all/GCF/001/686/405/GCF_001686405.1_ASM168640v1
ftp://ftp.ncbi.nlm.nih.gov/genomes/all/GCA/002/638/235/GCA_002638235.1_ASM263823v1								ftp://ftp.ncbi.nlm.nih.gov/genomes/all/GCF/001/686/425/GCF_001686425.1_ASM168642v1
ftp://ftp.ncbi.nlm.nih.gov/genomes/all/GCA/002/638/255/GCA_002638255.1_ASM263825v1								ftp://ftp.ncbi.nlm.nih.gov/genomes/all/GCF/001/686/445/GCF_001686445.1_ASM168644v1
ftp://ftp.ncbi.nlm.nih.gov/genomes/all/GCA/002/638/275/GCA_002638275.1_ASM263827v1								ftp://ftp.ncbi.nlm.nih.gov/genomes/all/GCF/001/686/465/GCF_001686465.1_ASM168646v1
ftp://ftp.ncbi.nlm.nih.gov/genomes/all/GCA/002/638/295/GCA_002638295.1_ASM263829v1								ftp://ftp.ncbi.nlm.nih.gov/genomes/all/GCF/001/686/485/GCF_001686485.1_ASM168648v1
ftp://ftp.ncbi.nlm.nih.gov/genomes/all/GCA/002/638/315/GCA_002638315.1_ASM263831v1								ftp://ftp.ncbi.nlm.nih.gov/genomes/all/GCF/001/686/505/GCF_001686505.1_ASM168650v1
ftp://ftp.ncbi.nlm.nih.gov/genomes/all/GCA/002/638/335/GCA_002638335.1_ASM263833v1								ftp://ftp.ncbi.nlm.nih.gov/genomes/all/GCF/001/686/525/GCF_001686525.1_ASM168652v1
ftp://ftp.ncbi.nlm.nih.gov/genomes/all/GCA/002/638/355/GCA_002638355.1_ASM263835v1								ftp://ftp.ncbi.nlm.nih.gov/genomes/all/GCF/001/686/545/GCF_001686545.1_ASM168654v1
ftp://ftp.ncbi.nlm.nih.gov/genomes/all/GCA/002/638/375/GCA_002638375.1_ASM263837v1								ftp://ftp.ncbi.nlm.nih.gov/genomes/all/GCF/001/686/565/GCF_001686565.1_ASM168656v1
ftp://ftp.ncbi.nlm.nih.gov/genomes/all/GCA/002/638/415/GCA_002638415.1_ASM263841v1								ftp://ftp.ncbi.nlm.nih.gov/genomes/all/GCF/001/686/585/GCF_001686585.1_ASM168658v1
ftp://ftp.ncbi.nlm.nih.gov/genomes/all/GCA/002/638/435/GCA_002638435.1_ASM263843v1								ftp://ftp.ncbi.nlm.nih.gov/genomes/all/GCF/001/686/605/GCF_001686605.1_ASM168660v1
ftp://ftp.ncbi.nlm.nih.gov/genomes/all/GCA/002/638/455/GCA_002638455.1_ASM263845v1								ftp://ftp.ncbi.nlm.nih.gov/genomes/all/GCF/001/686/625/GCF_001686625.1_ASM168662v1
ftp://ftp.ncbi.nlm.nih.gov/genomes/all/GCA/002/638/475/GCA_002638475.1_ASM263847v1								ftp://ftp.ncbi.nlm.nih.gov/genomes/all/GCF/001/687/385/GCF_001687385.1_ASM168738v1
ftp://ftp.ncbi.nlm.nih.gov/genomes/all/GCA/002/638/495/GCA_002638495.1_ASM263849v1								ftp://ftp.ncbi.nlm.nih.gov/genomes/all/GCF/001/687/405/GCF_001687405.1_ASM168740v1
ftp://ftp.ncbi.nlm.nih.gov/genomes/all/GCA/002/638/515/GCA_002638515.1_ASM263851v1								ftp://ftp.ncbi.nlm.nih.gov/genomes/all/GCF/001/831/395/GCF_001831395.1_ASM183139v1
ftp://ftp.ncbi.nlm.nih.gov/genomes/all/GCA/002/638/535/GCA_002638535.1_ASM263853v1								ftp://ftp.ncbi.nlm.nih.gov/genomes/all/GCF/001/831/415/GCF_001831415.1_ASM183141v1
ftp://ftp.ncbi.nlm.nih.gov/genomes/all/GCA/002/638/555/GCA_002638555.1_ASM263855v1								ftp://ftp.ncbi.nlm.nih.gov/genomes/all/GCF/001/831/435/GCF_001831435.1_ASM183143v1
ftp://ftp.ncbi.nlm.nih.gov/genomes/all/GCA/002/638/575/GCA_002638575.1_ASM263857v1								ftp://ftp.ncbi.nlm.nih.gov/genomes/all/GCF/001/831/455/GCF_001831455.1_ASM183145v1
ftp://ftp.ncbi.nlm.nih.gov/genomes/all/GCA/002/638/595/GCA_002638595.1_ASM263859v1								ftp://ftp.ncbi.nlm.nih.gov/genomes/all/GCF/001/984/925/GCF_001984925.1_ASM198492v1
ftp://ftp.ncbi.nlm.nih.gov/genomes/all/GCA/002/638/635/GCA_002638635.1_ASM263863v1								ftp://ftp.ncbi.nlm.nih.gov/genomes/all/GCF/001/984/945/GCF_001984945.1_ASM198494v1
ftp://ftp.ncbi.nlm.nih.gov/genomes/all/GCA/002/638/655/GCA_002638655.1_ASM263865v1								ftp://ftp.ncbi.nlm.nih.gov/genomes/all/GCF/001/984/965/GCF_001984965.1_ASM198496v1
ftp://ftp.ncbi.nlm.nih.gov/genomes/all/GCA/002/638/675/GCA_002638675.1_ASM263867v1								ftp://ftp.ncbi.nlm.nih.gov/genomes/all/GCF/001/984/985/GCF_001984985.1_ASM198498v1
ftp://ftp.ncbi.nlm.nih.gov/genomes/all/GCA/002/638/695/GCA_002638695.1_ASM263869v1								ftp://ftp.ncbi.nlm.nih.gov/genomes/all/GCF/001/985/005/GCF_001985005.1_ASM198500v1
ftp://ftp.ncbi.nlm.nih.gov/genomes/all/GCA/002/638/715/GCA_002638715.1_ASM263871v1								ftp://ftp.ncbi.nlm.nih.gov/genomes/all/GCF/001/985/025/GCF_001985025.1_ASM198502v1
ftp://ftp.ncbi.nlm.nih.gov/genomes/all/GCA/002/638/735/GCA_002638735.1_ASM263873v1								ftp://ftp.ncbi.nlm.nih.gov/genomes/all/GCF/001/985/045/GCF_001985045.1_ASM198504v1
ftp://ftp.ncbi.nlm.nih.gov/genomes/all/GCA/002/638/755/GCA_002638755.1_ASM263875v1								ftp://ftp.ncbi.nlm.nih.gov/genomes/all/GCF/001/985/065/GCF_001985065.1_ASM198506v1
ftp://ftp.ncbi.nlm.nih.gov/genomes/all/GCA/002/638/775/GCA_002638775.1_ASM263877v1								ftp://ftp.ncbi.nlm.nih.gov/genomes/all/GCF/001/985/085/GCF_001985085.1_ASM198508v1
ftp://ftp.ncbi.nlm.nih.gov/genomes/all/GCA/002/638/795/GCA_002638795.1_ASM263879v1								ftp://ftp.ncbi.nlm.nih.gov/genomes/all/GCF/001/985/105/GCF_001985105.1_ASM198510v1
ftp://ftp.ncbi.nlm.nih.gov/genomes/all/GCA/002/638/815/GCA_002638815.1_ASM263881v1								ftp://ftp.ncbi.nlm.nih.gov/genomes/all/GCF/001/985/125/GCF_001985125.1_ASM198512v1
ftp://ftp.ncbi.nlm.nih.gov/genomes/all/GCA/002/638/855/GCA_002638855.1_ASM263885v1								ftp://ftp.ncbi.nlm.nih.gov/genomes/all/GCF/001/985/145/GCF_001985145.1_ASM198514v1
ftp://ftp.ncbi.nlm.nih.gov/genomes/all/GCA/002/677/395/GCA_002677395.1_ASM267739v1								ftp://ftp.ncbi.nlm.nih.gov/genomes/all/GCF/001/985/165/GCF_001985165.1_ASM198516v1
ftp://ftp.ncbi.nlm.nih.gov/genomes/all/GCA/002/677/415/GCA_002677415.1_ASM267741v1								ftp://ftp.ncbi.nlm.nih.gov/genomes/all/GCF/001/985/205/GCF_001985205.1_ASM198520v1
ftp://ftp.ncbi.nlm.nih.gov/genomes/all/GCA/002/677/435/GCA_002677435.1_ASM267743v1								ftp://ftp.ncbi.nlm.nih.gov/genomes/all/GCF/001/985/225/GCF_001985225.1_ASM198522v1
ftp://ftp.ncbi.nlm.nih.gov/genomes/all/GCA/002/677/455/GCA_002677455.1_ASM267745v1								ftp://ftp.ncbi.nlm.nih.gov/genomes/all/GCF/001/985/245/GCF_001985245.1_ASM198524v1
ftp://ftp.ncbi.nlm.nih.gov/genomes/all/GCA/002/677/995/GCA_002677995.1_ASM267799v1								ftp://ftp.ncbi.nlm.nih.gov/genomes/all/GCF/001/985/265/GCF_001985265.1_ASM198526v1
ftp://ftp.ncbi.nlm.nih.gov/genomes/all/GCA/002/678/015/GCA_002678015.1_ASM267801v1								ftp://ftp.ncbi.nlm.nih.gov/genomes/all/GCF/001/985/285/GCF_001985285.1_ASM198528v1
ftp://ftp.ncbi.nlm.nih.gov/genomes/all/GCA/002/678/035/GCA_002678035.1_ASM267803v1								ftp://ftp.ncbi.nlm.nih.gov/genomes/all/GCF/001/985/305/GCF_001985305.1_ASM198530v1
ftp://ftp.ncbi.nlm.nih.gov/genomes/all/GCA/002/678/055/GCA_002678055.1_ASM267805v1								ftp://ftp.ncbi.nlm.nih.gov/genomes/all/GCF/001/985/325/GCF_001985325.1_ASM198532v1
ftp://ftp.ncbi.nlm.nih.gov/genomes/all/GCA/002/678/075/GCA_002678075.1_ASM267807v1								ftp://ftp.ncbi.nlm.nih.gov/genomes/all/GCF/001/985/345/GCF_001985345.1_ASM198534v1
ftp://ftp.ncbi.nlm.nih.gov/genomes/all/GCA/002/678/095/GCA_002678095.1_ASM267809v1								ftp://ftp.ncbi.nlm.nih.gov/genomes/all/GCF/001/985/365/GCF_001985365.1_ASM198536v1
ftp://ftp.ncbi.nlm.nih.gov/genomes/all/GCA/002/667/155/GCA_002667155.1_ASM266715v1								ftp://ftp.ncbi.nlm.nih.gov/genomes/all/GCF/001/985/385/GCF_001985385.1_ASM198538v1
ftp://ftp.ncbi.nlm.nih.gov/genomes/all/GCA/000/924/835/GCA_000924835.1_ViralProj265987								ftp://ftp.ncbi.nlm.nih.gov/genomes/all/GCF/001/985/405/GCF_001985405.1_ASM198540v1
ftp://ftp.ncbi.nlm.nih.gov/genomes/all/GCA/001/470/555/GCA_001470555.1_ViralProj306275								ftp://ftp.ncbi.nlm.nih.gov/genomes/all/GCF/001/985/425/GCF_001985425.1_ASM198542v1
ftp://ftp.ncbi.nlm.nih.gov/genomes/all/GCA/000/924/555/GCA_000924555.1_ViralProj264913								ftp://ftp.ncbi.nlm.nih.gov/genomes/all/GCF/001/985/445/GCF_001985445.1_ASM198544v1
ftp://ftp.ncbi.nlm.nih.gov/genomes/all/GCA/000/925/395/GCA_000925395.1_ViralProj264914								ftp://ftp.ncbi.nlm.nih.gov/genomes/all/GCF/001/985/465/GCF_001985465.1_ASM198546v1
ftp://ftp.ncbi.nlm.nih.gov/genomes/all/GCA/002/829/465/GCA_002829465.1_ASM282946v1								ftp://ftp.ncbi.nlm.nih.gov/genomes/all/GCF/001/985/485/GCF_001985485.1_ASM198548v1
ftp://ftp.ncbi.nlm.nih.gov/genomes/all/GCA/000/930/535/GCA_000930535.1_ViralProj269173								ftp://ftp.ncbi.nlm.nih.gov/genomes/all/GCF/001/985/505/GCF_001985505.1_ASM198550v1
ftp://ftp.ncbi.nlm.nih.gov/genomes/all/GCA/000/928/615/GCA_000928615.1_ViralProj267780								ftp://ftp.ncbi.nlm.nih.gov/genomes/all/GCF/001/985/525/GCF_001985525.1_ASM198552v1
ftp://ftp.ncbi.nlm.nih.gov/genomes/all/GCA/002/149/245/GCA_002149245.1_ViralProj266638.2								ftp://ftp.ncbi.nlm.nih.gov/genomes/all/GCF/001/985/545/GCF_001985545.1_ASM198554v1
ftp://ftp.ncbi.nlm.nih.gov/genomes/all/GCA/002/149/625/GCA_002149625.1_ViralProj266638.1								ftp://ftp.ncbi.nlm.nih.gov/genomes/all/GCF/001/985/565/GCF_001985565.1_ASM198556v1
ftp://ftp.ncbi.nlm.nih.gov/genomes/all/GCA/002/755/135/GCA_002755135.1_ASM275513v1								ftp://ftp.ncbi.nlm.nih.gov/genomes/all/GCF/001/985/585/GCF_001985585.1_ASM198558v1
ftp://ftp.ncbi.nlm.nih.gov/genomes/all/GCA/002/758/795/GCA_002758795.1_ASM275879v1								ftp://ftp.ncbi.nlm.nih.gov/genomes/all/GCF/001/985/605/GCF_001985605.1_ASM198560v1
ftp://ftp.ncbi.nlm.nih.gov/genomes/all/GCA/002/630/305/GCA_002630305.1_ASM263030v1								ftp://ftp.ncbi.nlm.nih.gov/genomes/all/GCF/001/985/625/GCF_001985625.1_ASM198562v1
ftp://ftp.ncbi.nlm.nih.gov/genomes/all/GCA/002/149/445/GCA_002149445.1_ViralProj266638.3								ftp://ftp.ncbi.nlm.nih.gov/genomes/all/GCF/001/985/645/GCF_001985645.1_ASM198564v1
ftp://ftp.ncbi.nlm.nih.gov/genomes/all/GCA/002/758/815/GCA_002758815.1_ASM275881v1								ftp://ftp.ncbi.nlm.nih.gov/genomes/all/GCF/001/985/665/GCF_001985665.1_ASM198566v1
ftp://ftp.ncbi.nlm.nih.gov/genomes/all/GCA/002/758/835/GCA_002758835.1_ASM275883v1								ftp://ftp.ncbi.nlm.nih.gov/genomes/all/GCF/001/985/685/GCF_001985685.1_ASM198568v1
ftp://ftp.ncbi.nlm.nih.gov/genomes/all/GCA/002/758/855/GCA_002758855.1_ASM275885v1								ftp://ftp.ncbi.nlm.nih.gov/genomes/all/GCF/001/985/705/GCF_001985705.1_ASM198570v1
ftp://ftp.ncbi.nlm.nih.gov/genomes/all/GCA/002/599/685/GCA_002599685.1_ASM259968v1								ftp://ftp.ncbi.nlm.nih.gov/genomes/all/GCF/001/985/725/GCF_001985725.1_ASM198572v1
ftp://ftp.ncbi.nlm.nih.gov/genomes/all/GCA/002/599/705/GCA_002599705.1_ASM259970v1								ftp://ftp.ncbi.nlm.nih.gov/genomes/all/GCF/001/985/745/GCF_001985745.1_ASM198574v1
ftp://ftp.ncbi.nlm.nih.gov/genomes/all/GCA/000/925/075/GCA_000925075.1_ViralProj266790								ftp://ftp.ncbi.nlm.nih.gov/genomes/all/GCF/001/985/765/GCF_001985765.1_ASM198576v1
ftp://ftp.ncbi.nlm.nih.gov/genomes/all/GCA/000/925/935/GCA_000925935.1_ViralProj266791								ftp://ftp.ncbi.nlm.nih.gov/genomes/all/GCF/001/985/785/GCF_001985785.1_ASM198578v1
ftp://ftp.ncbi.nlm.nih.gov/genomes/all/GCA/000/929/515/GCA_000929515.1_ViralProj266784								ftp://ftp.ncbi.nlm.nih.gov/genomes/all/GCF/001/985/805/GCF_001985805.1_ASM198580v1
ftp://ftp.ncbi.nlm.nih.gov/genomes/all/GCA/000/929/555/GCA_000929555.1_ViralProj266792								ftp://ftp.ncbi.nlm.nih.gov/genomes/all/GCF/001/985/825/GCF_001985825.1_ASM198582v1
ftp://ftp.ncbi.nlm.nih.gov/genomes/all/GCA/001/503/235/GCA_001503235.1_ViralProj307875								ftp://ftp.ncbi.nlm.nih.gov/genomes/all/GCF/001/985/845/GCF_001985845.1_ASM198584v1
ftp://ftp.ncbi.nlm.nih.gov/genomes/all/GCA/000/924/975/GCA_000924975.1_ViralProj266770								ftp://ftp.ncbi.nlm.nih.gov/genomes/all/GCF/001/985/865/GCF_001985865.1_ASM198586v1
ftp://ftp.ncbi.nlm.nih.gov/genomes/all/GCA/001/465/085/GCA_001465085.1_ViralProj305153								ftp://ftp.ncbi.nlm.nih.gov/genomes/all/GCF/001/985/885/GCF_001985885.1_ASM198588v1
ftp://ftp.ncbi.nlm.nih.gov/genomes/all/GCA/001/470/495/GCA_001470495.1_ViralProj306352								ftp://ftp.ncbi.nlm.nih.gov/genomes/all/GCF/001/985/905/GCF_001985905.1_ASM198590v1
ftp://ftp.ncbi.nlm.nih.gov/genomes/all/GCA/002/037/815/GCA_002037815.1_ViralProj287956								ftp://ftp.ncbi.nlm.nih.gov/genomes/all/GCF/001/985/925/GCF_001985925.1_ASM198592v1
ftp://ftp.ncbi.nlm.nih.gov/genomes/all/GCA/001/041/015/GCA_001041015.1_ViralProj287961								ftp://ftp.ncbi.nlm.nih.gov/genomes/all/GCF/001/985/945/GCF_001985945.1_ASM198594v1
ftp://ftp.ncbi.nlm.nih.gov/genomes/all/GCA/002/604/665/GCA_002604665.1_ASM260466v1								ftp://ftp.ncbi.nlm.nih.gov/genomes/all/GCF/001/985/965/GCF_001985965.1_ASM198596v1
ftp://ftp.ncbi.nlm.nih.gov/genomes/all/GCA/002/669/575/GCA_002669575.1_ASM266957v1								ftp://ftp.ncbi.nlm.nih.gov/genomes/all/GCF/001/985/985/GCF_001985985.1_ASM198598v1
ftp://ftp.ncbi.nlm.nih.gov/genomes/all/GCA/002/669/795/GCA_002669795.1_ASM266979v1								ftp://ftp.ncbi.nlm.nih.gov/genomes/all/GCF/001/986/005/GCF_001986005.1_ASM198600v1
ftp://ftp.ncbi.nlm.nih.gov/genomes/all/GCA/002/670/015/GCA_002670015.1_ASM267001v1								ftp://ftp.ncbi.nlm.nih.gov/genomes/all/GCF/001/986/025/GCF_001986025.1_ASM198602v1
ftp://ftp.ncbi.nlm.nih.gov/genomes/all/GCA/002/670/235/GCA_002670235.1_ASM267023v1								ftp://ftp.ncbi.nlm.nih.gov/genomes/all/GCF/001/986/045/GCF_001986045.1_ASM198604v1
ftp://ftp.ncbi.nlm.nih.gov/genomes/all/GCA/002/670/455/GCA_002670455.1_ASM267045v1								ftp://ftp.ncbi.nlm.nih.gov/genomes/all/GCF/001/986/065/GCF_001986065.1_ASM198606v1
ftp://ftp.ncbi.nlm.nih.gov/genomes/all/GCA/002/670/675/GCA_002670675.1_ASM267067v1								ftp://ftp.ncbi.nlm.nih.gov/genomes/all/GCF/001/986/085/GCF_001986085.1_ASM198608v1
ftp://ftp.ncbi.nlm.nih.gov/genomes/all/GCA/002/647/475/GCA_002647475.1_ASM264747v1								ftp://ftp.ncbi.nlm.nih.gov/genomes/all/GCF/001/986/105/GCF_001986105.1_ASM198610v1
ftp://ftp.ncbi.nlm.nih.gov/genomes/all/GCA/002/604/125/GCA_002604125.1_ASM260412v1								ftp://ftp.ncbi.nlm.nih.gov/genomes/all/GCF/001/986/155/GCF_001986155.1_ASM198615v1
ftp://ftp.ncbi.nlm.nih.gov/genomes/all/GCA/002/671/135/GCA_002671135.1_ASM267113v1								ftp://ftp.ncbi.nlm.nih.gov/genomes/all/GCF/001/986/175/GCF_001986175.1_ASM198617v1
ftp://ftp.ncbi.nlm.nih.gov/genomes/all/GCA/002/671/155/GCA_002671155.1_ASM267115v1								ftp://ftp.ncbi.nlm.nih.gov/genomes/all/GCF/001/986/195/GCF_001986195.1_ASM198619v1
ftp://ftp.ncbi.nlm.nih.gov/genomes/all/GCA/002/671/175/GCA_002671175.1_ASM267117v1								ftp://ftp.ncbi.nlm.nih.gov/genomes/all/GCF/001/986/215/GCF_001986215.1_ASM198621v1
ftp://ftp.ncbi.nlm.nih.gov/genomes/all/GCA/002/671/195/GCA_002671195.1_ASM267119v1								ftp://ftp.ncbi.nlm.nih.gov/genomes/all/GCF/001/986/235/GCF_001986235.1_ASM198623v1
ftp://ftp.ncbi.nlm.nih.gov/genomes/all/GCA/002/671/215/GCA_002671215.1_ASM267121v1								ftp://ftp.ncbi.nlm.nih.gov/genomes/all/GCF/001/986/255/GCF_001986255.1_ASM198625v1
ftp://ftp.ncbi.nlm.nih.gov/genomes/all/GCA/002/671/235/GCA_002671235.1_ASM267123v1								ftp://ftp.ncbi.nlm.nih.gov/genomes/all/GCF/001/986/275/GCF_001986275.1_ASM198627v1
ftp://ftp.ncbi.nlm.nih.gov/genomes/all/GCA/001/041/835/GCA_001041835.1_ViralProj287983								ftp://ftp.ncbi.nlm.nih.gov/genomes/all/GCF/001/986/295/GCF_001986295.1_ASM198629v1
ftp://ftp.ncbi.nlm.nih.gov/genomes/all/GCA/001/042/155/GCA_001042155.1_ViralProj287976								ftp://ftp.ncbi.nlm.nih.gov/genomes/all/GCF/001/986/315/GCF_001986315.1_ASM198631v1
ftp://ftp.ncbi.nlm.nih.gov/genomes/all/GCA/001/503/715/GCA_001503715.1_ViralProj307971								ftp://ftp.ncbi.nlm.nih.gov/genomes/all/GCF/001/986/335/GCF_001986335.1_ASM198633v1
ftp://ftp.ncbi.nlm.nih.gov/genomes/all/GCA/001/504/515/GCA_001504515.1_ViralProj307970								ftp://ftp.ncbi.nlm.nih.gov/genomes/all/GCF/001/986/355/GCF_001986355.1_ASM198635v1
ftp://ftp.ncbi.nlm.nih.gov/genomes/all/GCA/001/505/335/GCA_001505335.1_ViralProj307972								ftp://ftp.ncbi.nlm.nih.gov/genomes/all/GCF/001/986/375/GCF_001986375.1_ASM198637v1
ftp://ftp.ncbi.nlm.nih.gov/genomes/all/GCA/001/550/725/GCA_001550725.1_ViralProj310942								ftp://ftp.ncbi.nlm.nih.gov/genomes/all/GCF/001/986/415/GCF_001986415.1_ASM198641v1
ftp://ftp.ncbi.nlm.nih.gov/genomes/all/GCA/002/149/205/GCA_002149205.1_ViralProj266637.3								ftp://ftp.ncbi.nlm.nih.gov/genomes/all/GCF/001/986/435/GCF_001986435.1_ASM198643v1
ftp://ftp.ncbi.nlm.nih.gov/genomes/all/GCA/002/149/225/GCA_002149225.1_ViralProj266637.7								ftp://ftp.ncbi.nlm.nih.gov/genomes/all/GCF/001/986/455/GCF_001986455.1_ASM198645v1
ftp://ftp.ncbi.nlm.nih.gov/genomes/all/GCA/002/149/325/GCA_002149325.1_ViralProj266637.5								ftp://ftp.ncbi.nlm.nih.gov/genomes/all/GCF/001/986/475/GCF_001986475.1_ASM198647v1
ftp://ftp.ncbi.nlm.nih.gov/genomes/all/GCA/002/149/405/GCA_002149405.1_ViralProj266637.4								ftp://ftp.ncbi.nlm.nih.gov/genomes/all/GCF/001/986/495/GCF_001986495.1_ASM198649v1
ftp://ftp.ncbi.nlm.nih.gov/genomes/all/GCA/002/149/425/GCA_002149425.1_ViralProj266637.8								ftp://ftp.ncbi.nlm.nih.gov/genomes/all/GCF/001/986/515/GCF_001986515.1_ASM198651v1
ftp://ftp.ncbi.nlm.nih.gov/genomes/all/GCA/002/149/585/GCA_002149585.1_ViralProj266637.2								ftp://ftp.ncbi.nlm.nih.gov/genomes/all/GCF/001/986/535/GCF_001986535.1_ASM198653v1
ftp://ftp.ncbi.nlm.nih.gov/genomes/all/GCA/002/149/605/GCA_002149605.1_ViralProj266637.6								ftp://ftp.ncbi.nlm.nih.gov/genomes/all/GCF/001/986/555/GCF_001986555.1_ASM198655v1
ftp://ftp.ncbi.nlm.nih.gov/genomes/all/GCA/000/925/135/GCA_000925135.1_ViralMultiSegProj267263								ftp://ftp.ncbi.nlm.nih.gov/genomes/all/GCF/001/986/575/GCF_001986575.1_ASM198657v1
ftp://ftp.ncbi.nlm.nih.gov/genomes/all/GCA/000/954/275/GCA_000954275.1_ViralProj276859								ftp://ftp.ncbi.nlm.nih.gov/genomes/all/GCF/001/986/595/GCF_001986595.1_ASM198659v1
ftp://ftp.ncbi.nlm.nih.gov/genomes/all/GCA/000/954/615/GCA_000954615.1_ViralProj276856								ftp://ftp.ncbi.nlm.nih.gov/genomes/all/GCF/001/986/615/GCF_001986615.1_ASM198661v1
ftp://ftp.ncbi.nlm.nih.gov/genomes/all/GCA/000/954/635/GCA_000954635.1_ViralProj276860								ftp://ftp.ncbi.nlm.nih.gov/genomes/all/GCF/001/986/635/GCF_001986635.1_ASM198663v1
ftp://ftp.ncbi.nlm.nih.gov/genomes/all/GCA/000/954/955/GCA_000954955.1_ViralProj276681								ftp://ftp.ncbi.nlm.nih.gov/genomes/all/GCF/001/986/655/GCF_001986655.1_ASM198665v1
ftp://ftp.ncbi.nlm.nih.gov/genomes/all/GCA/000/954/995/GCA_000954995.1_ViralProj276858								ftp://ftp.ncbi.nlm.nih.gov/genomes/all/GCF/001/986/675/GCF_001986675.1_ASM198667v1
ftp://ftp.ncbi.nlm.nih.gov/genomes/all/GCA/000/955/335/GCA_000955335.1_ViralProj276857								ftp://ftp.ncbi.nlm.nih.gov/genomes/all/GCF/001/986/695/GCF_001986695.1_ASM198669v1
ftp://ftp.ncbi.nlm.nih.gov/genomes/all/GCA/000/955/355/GCA_000955355.1_ViralProj276861								ftp://ftp.ncbi.nlm.nih.gov/genomes/all/GCF/001/986/715/GCF_001986715.1_ASM198671v1
ftp://ftp.ncbi.nlm.nih.gov/genomes/all/GCA/001/551/765/GCA_001551765.1_ViralProj310944								ftp://ftp.ncbi.nlm.nih.gov/genomes/all/GCF/001/986/735/GCF_001986735.1_ASM198673v1
ftp://ftp.ncbi.nlm.nih.gov/genomes/all/GCA/002/604/305/GCA_002604305.1_ASM260430v1								ftp://ftp.ncbi.nlm.nih.gov/genomes/all/GCF/001/986/755/GCF_001986755.1_ASM198675v1
ftp://ftp.ncbi.nlm.nih.gov/genomes/all/GCA/001/019/815/GCA_001019815.1_ViralProj284804								ftp://ftp.ncbi.nlm.nih.gov/genomes/all/GCF/001/986/775/GCF_001986775.1_ASM198677v1
ftp://ftp.ncbi.nlm.nih.gov/genomes/all/GCA/001/038/595/GCA_001038595.1_ViralProj287583								ftp://ftp.ncbi.nlm.nih.gov/genomes/all/GCF/001/986/795/GCF_001986795.1_ASM198679v1
ftp://ftp.ncbi.nlm.nih.gov/genomes/all/GCA/001/041/355/GCA_001041355.1_ViralProj287954								ftp://ftp.ncbi.nlm.nih.gov/genomes/all/GCF/001/986/815/GCF_001986815.1_ASM198681v1
ftp://ftp.ncbi.nlm.nih.gov/genomes/all/GCA/001/041/495/GCA_001041495.1_ViralProj287986								ftp://ftp.ncbi.nlm.nih.gov/genomes/all/GCF/001/986/835/GCF_001986835.1_ASM198683v1
ftp://ftp.ncbi.nlm.nih.gov/genomes/all/GCA/001/041/795/GCA_001041795.1_ViralProj287975								ftp://ftp.ncbi.nlm.nih.gov/genomes/all/GCF/001/986/855/GCF_001986855.1_ASM198685v1
ftp://ftp.ncbi.nlm.nih.gov/genomes/all/GCA/001/042/195/GCA_001042195.1_ViralProj287984								ftp://ftp.ncbi.nlm.nih.gov/genomes/all/GCF/001/986/875/GCF_001986875.1_ASM198687v1
ftp://ftp.ncbi.nlm.nih.gov/genomes/all/GCA/001/041/115/GCA_001041115.1_ViralProj287985								ftp://ftp.ncbi.nlm.nih.gov/genomes/all/GCF/001/986/895/GCF_001986895.1_ASM198689v1
ftp://ftp.ncbi.nlm.nih.gov/genomes/all/GCA/002/598/565/GCA_002598565.1_ASM259856v1								ftp://ftp.ncbi.nlm.nih.gov/genomes/all/GCF/001/986/915/GCF_001986915.1_ASM198691v1
ftp://ftp.ncbi.nlm.nih.gov/genomes/all/GCA/000/928/835/GCA_000928835.1_ViralProj268860								ftp://ftp.ncbi.nlm.nih.gov/genomes/all/GCF/001/986/935/GCF_001986935.1_ASM198693v1
ftp://ftp.ncbi.nlm.nih.gov/genomes/all/GCA/000/929/895/GCA_000929895.1_ViralMultiSegProj269146								ftp://ftp.ncbi.nlm.nih.gov/genomes/all/GCF/001/986/955/GCF_001986955.1_ASM198695v1
ftp://ftp.ncbi.nlm.nih.gov/genomes/all/GCA/001/041/435/GCA_001041435.1_ViralProj287973								ftp://ftp.ncbi.nlm.nih.gov/genomes/all/GCF/001/986/975/GCF_001986975.1_ASM198697v1
ftp://ftp.ncbi.nlm.nih.gov/genomes/all/GCA/001/505/975/GCA_001505975.1_ViralProj307969								ftp://ftp.ncbi.nlm.nih.gov/genomes/all/GCF/001/986/995/GCF_001986995.1_ASM198699v1
ftp://ftp.ncbi.nlm.nih.gov/genomes/all/GCA/001/551/425/GCA_001551425.1_ViralProj310941								ftp://ftp.ncbi.nlm.nih.gov/genomes/all/GCF/001/987/015/GCF_001987015.1_ASM198701v1
ftp://ftp.ncbi.nlm.nih.gov/genomes/all/GCA/002/605/245/GCA_002605245.1_ASM260524v1								ftp://ftp.ncbi.nlm.nih.gov/genomes/all/GCF/001/987/035/GCF_001987035.1_ASM198703v1
ftp://ftp.ncbi.nlm.nih.gov/genomes/all/GCA/001/041/535/GCA_001041535.1_ViralProj287994								ftp://ftp.ncbi.nlm.nih.gov/genomes/all/GCF/001/987/055/GCF_001987055.1_ASM198705v1
ftp://ftp.ncbi.nlm.nih.gov/genomes/all/GCA/001/503/535/GCA_001503535.1_ViralProj307935								ftp://ftp.ncbi.nlm.nih.gov/genomes/all/GCF/001/987/075/GCF_001987075.1_ASM198707v1
ftp://ftp.ncbi.nlm.nih.gov/genomes/all/GCA/002/756/215/GCA_002756215.1_ASM275621v1								ftp://ftp.ncbi.nlm.nih.gov/genomes/all/GCF/001/987/095/GCF_001987095.1_ASM198709v1
ftp://ftp.ncbi.nlm.nih.gov/genomes/all/GCA/002/604/225/GCA_002604225.1_ASM260422v1								ftp://ftp.ncbi.nlm.nih.gov/genomes/all/GCF/001/987/115/GCF_001987115.1_ASM198711v1
ftp://ftp.ncbi.nlm.nih.gov/genomes/all/GCA/001/041/475/GCA_001041475.1_ViralProj287982								ftp://ftp.ncbi.nlm.nih.gov/genomes/all/GCF/001/987/135/GCF_001987135.1_ASM198713v1
ftp://ftp.ncbi.nlm.nih.gov/genomes/all/GCA/001/041/095/GCA_001041095.1_ViralProj287981								ftp://ftp.ncbi.nlm.nih.gov/genomes/all/GCF/001/987/155/GCF_001987155.1_ASM198715v1
ftp://ftp.ncbi.nlm.nih.gov/genomes/all/GCA/002/599/745/GCA_002599745.1_ASM259974v1								ftp://ftp.ncbi.nlm.nih.gov/genomes/all/GCF/001/987/175/GCF_001987175.1_ASM198717v1
ftp://ftp.ncbi.nlm.nih.gov/genomes/all/GCA/002/599/765/GCA_002599765.1_ASM259976v1								ftp://ftp.ncbi.nlm.nih.gov/genomes/all/GCF/001/987/195/GCF_001987195.1_ASM198719v1
ftp://ftp.ncbi.nlm.nih.gov/genomes/all/GCA/002/599/785/GCA_002599785.1_ASM259978v1								ftp://ftp.ncbi.nlm.nih.gov/genomes/all/GCF/001/987/215/GCF_001987215.1_ASM198721v1
ftp://ftp.ncbi.nlm.nih.gov/genomes/all/GCA/002/599/805/GCA_002599805.1_ASM259980v1								ftp://ftp.ncbi.nlm.nih.gov/genomes/all/GCF/001/987/235/GCF_001987235.1_ASM198723v1
ftp://ftp.ncbi.nlm.nih.gov/genomes/all/GCA/002/599/825/GCA_002599825.1_ASM259982v1								ftp://ftp.ncbi.nlm.nih.gov/genomes/all/GCF/001/987/255/GCF_001987255.1_ASM198725v1
ftp://ftp.ncbi.nlm.nih.gov/genomes/all/GCA/000/930/615/GCA_000930615.1_ViralMultiSegProj269795								ftp://ftp.ncbi.nlm.nih.gov/genomes/all/GCF/001/987/275/GCF_001987275.1_ASM198727v1
ftp://ftp.ncbi.nlm.nih.gov/genomes/all/GCA/002/660/335/GCA_002660335.1_ASM266033v1								ftp://ftp.ncbi.nlm.nih.gov/genomes/all/GCF/001/987/295/GCF_001987295.1_ASM198729v1
ftp://ftp.ncbi.nlm.nih.gov/genomes/all/GCA/001/041/735/GCA_001041735.1_ViralProj287959								ftp://ftp.ncbi.nlm.nih.gov/genomes/all/GCF/001/987/315/GCF_001987315.1_ASM198731v1
ftp://ftp.ncbi.nlm.nih.gov/genomes/all/GCA/001/503/695/GCA_001503695.1_ViralProj307967								ftp://ftp.ncbi.nlm.nih.gov/genomes/all/GCF/001/987/335/GCF_001987335.1_ASM198733v1
ftp://ftp.ncbi.nlm.nih.gov/genomes/all/GCA/001/504/495/GCA_001504495.1_ViralProj307966								ftp://ftp.ncbi.nlm.nih.gov/genomes/all/GCF/001/987/355/GCF_001987355.1_ASM198735v1
ftp://ftp.ncbi.nlm.nih.gov/genomes/all/GCA/001/505/315/GCA_001505315.1_ViralProj307968								ftp://ftp.ncbi.nlm.nih.gov/genomes/all/GCF/001/987/375/GCF_001987375.1_ASM198737v1
ftp://ftp.ncbi.nlm.nih.gov/genomes/all/GCA/001/505/955/GCA_001505955.1_ViralProj307965								ftp://ftp.ncbi.nlm.nih.gov/genomes/all/GCF/001/987/395/GCF_001987395.1_ASM198739v1
ftp://ftp.ncbi.nlm.nih.gov/genomes/all/GCA/002/602/105/GCA_002602105.1_ASM260210v1								ftp://ftp.ncbi.nlm.nih.gov/genomes/all/GCF/001/987/415/GCF_001987415.1_ASM198741v1
ftp://ftp.ncbi.nlm.nih.gov/genomes/all/GCA/001/503/755/GCA_001503755.1_ViralProj308009								ftp://ftp.ncbi.nlm.nih.gov/genomes/all/GCF/001/987/435/GCF_001987435.1_ASM198743v1
ftp://ftp.ncbi.nlm.nih.gov/genomes/all/GCA/001/503/775/GCA_001503775.1_ViralProj308013								ftp://ftp.ncbi.nlm.nih.gov/genomes/all/GCF/001/987/455/GCF_001987455.1_ASM198745v1
ftp://ftp.ncbi.nlm.nih.gov/genomes/all/GCA/001/504/535/GCA_001504535.1_ViralProj308008								ftp://ftp.ncbi.nlm.nih.gov/genomes/all/GCF/001/987/475/GCF_001987475.1_ASM198747v1
ftp://ftp.ncbi.nlm.nih.gov/genomes/all/GCA/001/504/555/GCA_001504555.1_ViralProj308012								ftp://ftp.ncbi.nlm.nih.gov/genomes/all/GCF/001/987/495/GCF_001987495.1_ASM198749v1
ftp://ftp.ncbi.nlm.nih.gov/genomes/all/GCA/001/505/375/GCA_001505375.1_ViralProj308010								ftp://ftp.ncbi.nlm.nih.gov/genomes/all/GCF/001/987/515/GCF_001987515.1_ASM198751v1
ftp://ftp.ncbi.nlm.nih.gov/genomes/all/GCA/001/505/395/GCA_001505395.1_ViralProj308014								ftp://ftp.ncbi.nlm.nih.gov/genomes/all/GCF/001/987/535/GCF_001987535.1_ASM198753v1
ftp://ftp.ncbi.nlm.nih.gov/genomes/all/GCA/001/506/015/GCA_001506015.1_ViralProj308011								ftp://ftp.ncbi.nlm.nih.gov/genomes/all/GCF/001/987/555/GCF_001987555.1_ASM198755v1
ftp://ftp.ncbi.nlm.nih.gov/genomes/all/GCA/002/277/885/GCA_002277885.1_ViralProj309565								ftp://ftp.ncbi.nlm.nih.gov/genomes/all/GCF/001/987/575/GCF_001987575.1_ASM198757v1
ftp://ftp.ncbi.nlm.nih.gov/genomes/all/GCA/000/928/115/GCA_000928115.1_ViralProj271033								ftp://ftp.ncbi.nlm.nih.gov/genomes/all/GCF/001/987/595/GCF_001987595.1_ASM198759v1
ftp://ftp.ncbi.nlm.nih.gov/genomes/all/GCA/000/929/035/GCA_000929035.1_ViralProj271153								ftp://ftp.ncbi.nlm.nih.gov/genomes/all/GCF/001/987/615/GCF_001987615.1_ASM198761v1
ftp://ftp.ncbi.nlm.nih.gov/genomes/all/GCA/002/827/145/GCA_002827145.1_ASM282714v1								ftp://ftp.ncbi.nlm.nih.gov/genomes/all/GCF/001/987/635/GCF_001987635.1_ASM198763v1
ftp://ftp.ncbi.nlm.nih.gov/genomes/all/GCA/002/604/265/GCA_002604265.1_ASM260426v1								ftp://ftp.ncbi.nlm.nih.gov/genomes/all/GCF/001/987/655/GCF_001987655.1_ASM198765v1
ftp://ftp.ncbi.nlm.nih.gov/genomes/all/GCA/002/606/825/GCA_002606825.1_ASM260682v1								ftp://ftp.ncbi.nlm.nih.gov/genomes/all/GCF/001/987/675/GCF_001987675.1_ASM198767v1
ftp://ftp.ncbi.nlm.nih.gov/genomes/all/GCA/001/041/755/GCA_001041755.1_ViralProj287963								ftp://ftp.ncbi.nlm.nih.gov/genomes/all/GCF/001/987/695/GCF_001987695.1_ASM198769v1
ftp://ftp.ncbi.nlm.nih.gov/genomes/all/GCA/001/503/055/GCA_001503055.1_ViralProj307833								ftp://ftp.ncbi.nlm.nih.gov/genomes/all/GCF/001/987/715/GCF_001987715.1_ASM198771v1
ftp://ftp.ncbi.nlm.nih.gov/genomes/all/GCA/000/929/055/GCA_000929055.1_ViralProj271410								ftp://ftp.ncbi.nlm.nih.gov/genomes/all/GCF/001/987/735/GCF_001987735.1_ASM198773v1
ftp://ftp.ncbi.nlm.nih.gov/genomes/all/GCA/000/930/115/GCA_000930115.1_ViralProj271780								ftp://ftp.ncbi.nlm.nih.gov/genomes/all/GCF/001/987/755/GCF_001987755.1_ASM198775v1
ftp://ftp.ncbi.nlm.nih.gov/genomes/all/GCA/000/930/695/GCA_000930695.1_ViralProj271121								ftp://ftp.ncbi.nlm.nih.gov/genomes/all/GCF/001/987/775/GCF_001987775.1_ASM198777v1
ftp://ftp.ncbi.nlm.nih.gov/genomes/all/GCA/001/040/995/GCA_001040995.1_ViralProj287957								ftp://ftp.ncbi.nlm.nih.gov/genomes/all/GCF/001/987/795/GCF_001987795.1_ASM198779v1
ftp://ftp.ncbi.nlm.nih.gov/genomes/all/GCA/001/551/085/GCA_001551085.1_ViralProj310939								ftp://ftp.ncbi.nlm.nih.gov/genomes/all/GCF/001/987/815/GCF_001987815.1_ASM198781v1
ftp://ftp.ncbi.nlm.nih.gov/genomes/all/GCA/002/756/395/GCA_002756395.1_ASM275639v1								ftp://ftp.ncbi.nlm.nih.gov/genomes/all/GCF/001/987/835/GCF_001987835.1_ASM198783v1
ftp://ftp.ncbi.nlm.nih.gov/genomes/all/GCA/002/756/415/GCA_002756415.1_ASM275641v1								ftp://ftp.ncbi.nlm.nih.gov/genomes/all/GCF/001/987/855/GCF_001987855.1_ASM198785v1
ftp://ftp.ncbi.nlm.nih.gov/genomes/all/GCA/000/955/415/GCA_000955415.1_ViralProj276873								ftp://ftp.ncbi.nlm.nih.gov/genomes/all/GCF/001/987/875/GCF_001987875.1_ASM198787v1
ftp://ftp.ncbi.nlm.nih.gov/genomes/all/GCA/002/604/285/GCA_002604285.1_ASM260428v1								ftp://ftp.ncbi.nlm.nih.gov/genomes/all/GCF/001/987/895/GCF_001987895.1_ASM198789v1
ftp://ftp.ncbi.nlm.nih.gov/genomes/all/GCA/000/928/175/GCA_000928175.1_ViralProj271778								ftp://ftp.ncbi.nlm.nih.gov/genomes/all/GCF/001/987/915/GCF_001987915.1_ASM198791v1
ftp://ftp.ncbi.nlm.nih.gov/genomes/all/GCA/000/928/255/GCA_000928255.1_ViralProj272443								ftp://ftp.ncbi.nlm.nih.gov/genomes/all/GCF/001/987/935/GCF_001987935.1_ASM198793v1
ftp://ftp.ncbi.nlm.nih.gov/genomes/all/GCA/000/929/075/GCA_000929075.1_ViralProj271779								ftp://ftp.ncbi.nlm.nih.gov/genomes/all/GCF/001/987/955/GCF_001987955.1_ASM198795v1
ftp://ftp.ncbi.nlm.nih.gov/genomes/all/GCA/000/930/775/GCA_000930775.1_ViralProj272150								ftp://ftp.ncbi.nlm.nih.gov/genomes/all/GCF/001/987/975/GCF_001987975.1_ASM198797v1
ftp://ftp.ncbi.nlm.nih.gov/genomes/all/GCA/001/041/895/GCA_001041895.1_ViralProj287995								ftp://ftp.ncbi.nlm.nih.gov/genomes/all/GCF/001/987/995/GCF_001987995.1_ASM198799v1
ftp://ftp.ncbi.nlm.nih.gov/genomes/all/GCA/000/954/315/GCA_000954315.1_ViralProj276867								ftp://ftp.ncbi.nlm.nih.gov/genomes/all/GCF/001/988/015/GCF_001988015.1_ASM198801v1
ftp://ftp.ncbi.nlm.nih.gov/genomes/all/GCA/000/954/675/GCA_000954675.1_ViralProj276868								ftp://ftp.ncbi.nlm.nih.gov/genomes/all/GCF/001/988/035/GCF_001988035.1_ASM198803v1
ftp://ftp.ncbi.nlm.nih.gov/genomes/all/GCA/001/042/135/GCA_001042135.1_ViralProj287971								ftp://ftp.ncbi.nlm.nih.gov/genomes/all/GCF/001/988/055/GCF_001988055.1_ASM198805v1
ftp://ftp.ncbi.nlm.nih.gov/genomes/all/GCA/001/503/735/GCA_001503735.1_ViralProj308005								ftp://ftp.ncbi.nlm.nih.gov/genomes/all/GCF/001/988/075/GCF_001988075.1_ASM198807v1
ftp://ftp.ncbi.nlm.nih.gov/genomes/all/GCA/001/505/355/GCA_001505355.1_ViralProj308006								ftp://ftp.ncbi.nlm.nih.gov/genomes/all/GCF/001/988/095/GCF_001988095.1_ASM198809v1
ftp://ftp.ncbi.nlm.nih.gov/genomes/all/GCA/001/551/745/GCA_001551745.1_ViralProj310940								ftp://ftp.ncbi.nlm.nih.gov/genomes/all/GCF/001/988/115/GCF_001988115.1_ASM198811v1
ftp://ftp.ncbi.nlm.nih.gov/genomes/all/GCA/002/149/505/GCA_002149505.1_ViralProj308006.1								ftp://ftp.ncbi.nlm.nih.gov/genomes/all/GCF/001/988/135/GCF_001988135.1_ASM198813v1
ftp://ftp.ncbi.nlm.nih.gov/genomes/all/GCA/002/149/525/GCA_002149525.1_ViralProj308007.2								ftp://ftp.ncbi.nlm.nih.gov/genomes/all/GCF/001/988/155/GCF_001988155.1_ASM198815v1
ftp://ftp.ncbi.nlm.nih.gov/genomes/all/GCA/002/149/685/GCA_002149685.1_ViralProj308006.2								ftp://ftp.ncbi.nlm.nih.gov/genomes/all/GCF/001/988/175/GCF_001988175.1_ASM198817v1
ftp://ftp.ncbi.nlm.nih.gov/genomes/all/GCA/002/149/705/GCA_002149705.1_ViralProj343546.1								ftp://ftp.ncbi.nlm.nih.gov/genomes/all/GCF/001/988/195/GCF_001988195.1_ASM198819v1
ftp://ftp.ncbi.nlm.nih.gov/genomes/all/GCA/002/149/745/GCA_002149745.1_ViralProj308007.1								ftp://ftp.ncbi.nlm.nih.gov/genomes/all/GCF/001/988/215/GCF_001988215.1_ASM198821v1
ftp://ftp.ncbi.nlm.nih.gov/genomes/all/GCA/002/149/825/GCA_002149825.1_ViralProj343546.2								ftp://ftp.ncbi.nlm.nih.gov/genomes/all/GCF/001/988/235/GCF_001988235.1_ASM198823v1
ftp://ftp.ncbi.nlm.nih.gov/genomes/all/GCA/002/605/085/GCA_002605085.1_ASM260508v1								ftp://ftp.ncbi.nlm.nih.gov/genomes/all/GCF/001/988/255/GCF_001988255.1_ASM198825v1
ftp://ftp.ncbi.nlm.nih.gov/genomes/all/GCA/002/605/105/GCA_002605105.1_ASM260510v1								ftp://ftp.ncbi.nlm.nih.gov/genomes/all/GCF/001/988/275/GCF_001988275.1_ASM198827v1
ftp://ftp.ncbi.nlm.nih.gov/genomes/all/GCA/002/605/125/GCA_002605125.1_ASM260512v1								ftp://ftp.ncbi.nlm.nih.gov/genomes/all/GCF/001/988/295/GCF_001988295.1_ASM198829v1
ftp://ftp.ncbi.nlm.nih.gov/genomes/all/GCA/002/605/185/GCA_002605185.1_ASM260518v1								ftp://ftp.ncbi.nlm.nih.gov/genomes/all/GCF/001/988/315/GCF_001988315.1_ASM198831v1
ftp://ftp.ncbi.nlm.nih.gov/genomes/all/GCA/002/605/205/GCA_002605205.1_ASM260520v1								ftp://ftp.ncbi.nlm.nih.gov/genomes/all/GCF/001/988/335/GCF_001988335.1_ASM198833v1
ftp://ftp.ncbi.nlm.nih.gov/genomes/all/GCA/002/605/225/GCA_002605225.1_ASM260522v1								ftp://ftp.ncbi.nlm.nih.gov/genomes/all/GCF/001/988/355/GCF_001988355.1_ASM198835v1
ftp://ftp.ncbi.nlm.nih.gov/genomes/all/GCA/002/599/945/GCA_002599945.1_ASM259994v1								ftp://ftp.ncbi.nlm.nih.gov/genomes/all/GCF/001/988/375/GCF_001988375.1_ASM198837v1
ftp://ftp.ncbi.nlm.nih.gov/genomes/all/GCA/002/756/475/GCA_002756475.1_ASM275647v1								ftp://ftp.ncbi.nlm.nih.gov/genomes/all/GCF/001/988/395/GCF_001988395.1_ASM198839v1
ftp://ftp.ncbi.nlm.nih.gov/genomes/all/GCA/002/756/455/GCA_002756455.1_ASM275645v1								ftp://ftp.ncbi.nlm.nih.gov/genomes/all/GCF/001/988/415/GCF_001988415.1_ASM198841v1
ftp://ftp.ncbi.nlm.nih.gov/genomes/all/GCA/001/500/355/GCA_001500355.1_ViralProj307512								ftp://ftp.ncbi.nlm.nih.gov/genomes/all/GCF/001/988/435/GCF_001988435.1_ASM198843v1
ftp://ftp.ncbi.nlm.nih.gov/genomes/all/GCA/001/042/095/GCA_001042095.1_ViralProj287960								ftp://ftp.ncbi.nlm.nih.gov/genomes/all/GCF/001/988/455/GCF_001988455.1_ASM198845v1
ftp://ftp.ncbi.nlm.nih.gov/genomes/all/GCA/001/041/135/GCA_001041135.1_ViralProj287989								ftp://ftp.ncbi.nlm.nih.gov/genomes/all/GCF/001/988/475/GCF_001988475.1_ASM198847v1
ftp://ftp.ncbi.nlm.nih.gov/genomes/all/GCA/000/929/115/GCA_000929115.1_ViralProj272440								ftp://ftp.ncbi.nlm.nih.gov/genomes/all/GCF/001/988/495/GCF_001988495.1_ASM198849v1
ftp://ftp.ncbi.nlm.nih.gov/genomes/all/GCA/001/501/795/GCA_001501795.1_ViralProj307686								ftp://ftp.ncbi.nlm.nih.gov/genomes/all/GCF/001/988/515/GCF_001988515.1_ASM198851v1
ftp://ftp.ncbi.nlm.nih.gov/genomes/all/GCA/000/929/135/GCA_000929135.1_ViralProj272444								ftp://ftp.ncbi.nlm.nih.gov/genomes/all/GCF/001/988/535/GCF_001988535.1_ASM198853v1
ftp://ftp.ncbi.nlm.nih.gov/genomes/all/GCA/000/954/695/GCA_000954695.1_ViralProj276872								ftp://ftp.ncbi.nlm.nih.gov/genomes/all/GCF/001/988/555/GCF_001988555.1_ASM198855v1
ftp://ftp.ncbi.nlm.nih.gov/genomes/all/GCA/000/930/155/GCA_000930155.1_ViralProj272395								ftp://ftp.ncbi.nlm.nih.gov/genomes/all/GCF/001/988/575/GCF_001988575.1_ASM198857v1
ftp://ftp.ncbi.nlm.nih.gov/genomes/all/GCA/001/041/055/GCA_001041055.1_ViralProj287972								ftp://ftp.ncbi.nlm.nih.gov/genomes/all/GCF/001/988/595/GCF_001988595.1_ASM198859v1
ftp://ftp.ncbi.nlm.nih.gov/genomes/all/GCA/002/604/525/GCA_002604525.1_ASM260452v1								ftp://ftp.ncbi.nlm.nih.gov/genomes/all/GCF/001/988/615/GCF_001988615.1_ASM198861v1
ftp://ftp.ncbi.nlm.nih.gov/genomes/all/GCA/001/042/235/GCA_001042235.1_ViralProj287992								ftp://ftp.ncbi.nlm.nih.gov/genomes/all/GCF/001/988/635/GCF_001988635.1_ASM198863v1
ftp://ftp.ncbi.nlm.nih.gov/genomes/all/GCA/002/661/015/GCA_002661015.1_ASM266101v1								ftp://ftp.ncbi.nlm.nih.gov/genomes/all/GCF/001/988/655/GCF_001988655.1_ASM198865v1
ftp://ftp.ncbi.nlm.nih.gov/genomes/all/GCA/002/681/995/GCA_002681995.1_ASM268199v1								ftp://ftp.ncbi.nlm.nih.gov/genomes/all/GCF/001/988/675/GCF_001988675.1_ASM198867v1
ftp://ftp.ncbi.nlm.nih.gov/genomes/all/GCA/002/682/015/GCA_002682015.1_ASM268201v1								ftp://ftp.ncbi.nlm.nih.gov/genomes/all/GCF/001/988/695/GCF_001988695.1_ASM198869v1
ftp://ftp.ncbi.nlm.nih.gov/genomes/all/GCA/002/682/035/GCA_002682035.1_ASM268203v1								ftp://ftp.ncbi.nlm.nih.gov/genomes/all/GCF/001/988/715/GCF_001988715.1_ASM198871v1
ftp://ftp.ncbi.nlm.nih.gov/genomes/all/GCA/002/682/055/GCA_002682055.1_ASM268205v1								ftp://ftp.ncbi.nlm.nih.gov/genomes/all/GCF/001/988/735/GCF_001988735.1_ASM198873v1
ftp://ftp.ncbi.nlm.nih.gov/genomes/all/GCA/002/682/075/GCA_002682075.1_ASM268207v1								ftp://ftp.ncbi.nlm.nih.gov/genomes/all/GCF/001/988/755/GCF_001988755.1_ASM198875v1
ftp://ftp.ncbi.nlm.nih.gov/genomes/all/GCA/002/682/095/GCA_002682095.1_ASM268209v1								ftp://ftp.ncbi.nlm.nih.gov/genomes/all/GCF/001/988/775/GCF_001988775.1_ASM198877v1
ftp://ftp.ncbi.nlm.nih.gov/genomes/all/GCA/002/682/115/GCA_002682115.1_ASM268211v1								ftp://ftp.ncbi.nlm.nih.gov/genomes/all/GCF/001/988/795/GCF_001988795.1_ASM198879v1
ftp://ftp.ncbi.nlm.nih.gov/genomes/all/GCA/002/682/135/GCA_002682135.1_ASM268213v1								ftp://ftp.ncbi.nlm.nih.gov/genomes/all/GCF/001/988/815/GCF_001988815.1_ASM198881v1
ftp://ftp.ncbi.nlm.nih.gov/genomes/all/GCA/002/682/175/GCA_002682175.1_ASM268217v1								ftp://ftp.ncbi.nlm.nih.gov/genomes/all/GCF/001/988/835/GCF_001988835.1_ASM198883v1
ftp://ftp.ncbi.nlm.nih.gov/genomes/all/GCA/002/682/195/GCA_002682195.1_ASM268219v1								ftp://ftp.ncbi.nlm.nih.gov/genomes/all/GCF/001/988/855/GCF_001988855.1_ASM198885v1
ftp://ftp.ncbi.nlm.nih.gov/genomes/all/GCA/002/682/215/GCA_002682215.1_ASM268221v1								ftp://ftp.ncbi.nlm.nih.gov/genomes/all/GCF/001/988/875/GCF_001988875.1_ASM198887v1
ftp://ftp.ncbi.nlm.nih.gov/genomes/all/GCA/002/682/255/GCA_002682255.1_ASM268225v1								ftp://ftp.ncbi.nlm.nih.gov/genomes/all/GCF/001/988/895/GCF_001988895.1_ASM198889v1
ftp://ftp.ncbi.nlm.nih.gov/genomes/all/GCA/002/682/275/GCA_002682275.1_ASM268227v1								ftp://ftp.ncbi.nlm.nih.gov/genomes/all/GCF/001/988/915/GCF_001988915.1_ASM198891v1
ftp://ftp.ncbi.nlm.nih.gov/genomes/all/GCA/002/682/295/GCA_002682295.1_ASM268229v1								ftp://ftp.ncbi.nlm.nih.gov/genomes/all/GCF/001/988/995/GCF_001988995.1_ASM198899v1
ftp://ftp.ncbi.nlm.nih.gov/genomes/all/GCA/002/682/315/GCA_002682315.1_ASM268231v1								ftp://ftp.ncbi.nlm.nih.gov/genomes/all/GCF/001/989/015/GCF_001989015.1_ASM198901v1
ftp://ftp.ncbi.nlm.nih.gov/genomes/all/GCA/002/682/335/GCA_002682335.1_ASM268233v1								ftp://ftp.ncbi.nlm.nih.gov/genomes/all/GCF/001/989/035/GCF_001989035.1_ASM198903v1
ftp://ftp.ncbi.nlm.nih.gov/genomes/all/GCA/002/682/355/GCA_002682355.1_ASM268235v1								ftp://ftp.ncbi.nlm.nih.gov/genomes/all/GCF/001/989/055/GCF_001989055.1_ASM198905v1
ftp://ftp.ncbi.nlm.nih.gov/genomes/all/GCA/002/682/395/GCA_002682395.1_ASM268239v1								ftp://ftp.ncbi.nlm.nih.gov/genomes/all/GCF/001/989/075/GCF_001989075.1_ASM198907v1
ftp://ftp.ncbi.nlm.nih.gov/genomes/all/GCA/002/682/415/GCA_002682415.1_ASM268241v1								ftp://ftp.ncbi.nlm.nih.gov/genomes/all/GCF/001/989/095/GCF_001989095.1_ASM198909v1
ftp://ftp.ncbi.nlm.nih.gov/genomes/all/GCA/002/682/435/GCA_002682435.1_ASM268243v1								ftp://ftp.ncbi.nlm.nih.gov/genomes/all/GCF/001/989/115/GCF_001989115.1_ASM198911v1
ftp://ftp.ncbi.nlm.nih.gov/genomes/all/GCA/002/682/455/GCA_002682455.1_ASM268245v1								ftp://ftp.ncbi.nlm.nih.gov/genomes/all/GCF/001/989/135/GCF_001989135.1_ASM198913v1
ftp://ftp.ncbi.nlm.nih.gov/genomes/all/GCA/002/682/475/GCA_002682475.1_ASM268247v1								ftp://ftp.ncbi.nlm.nih.gov/genomes/all/GCF/001/989/155/GCF_001989155.1_ASM198915v1
ftp://ftp.ncbi.nlm.nih.gov/genomes/all/GCA/002/682/495/GCA_002682495.1_ASM268249v1								ftp://ftp.ncbi.nlm.nih.gov/genomes/all/GCF/001/989/175/GCF_001989175.1_ASM198917v1
ftp://ftp.ncbi.nlm.nih.gov/genomes/all/GCA/002/682/515/GCA_002682515.1_ASM268251v1								ftp://ftp.ncbi.nlm.nih.gov/genomes/all/GCF/001/989/195/GCF_001989195.1_ASM198919v1
ftp://ftp.ncbi.nlm.nih.gov/genomes/all/GCA/002/682/535/GCA_002682535.1_ASM268253v1								ftp://ftp.ncbi.nlm.nih.gov/genomes/all/GCF/001/989/215/GCF_001989215.1_ASM198921v1
ftp://ftp.ncbi.nlm.nih.gov/genomes/all/GCA/002/682/575/GCA_002682575.1_ASM268257v1								ftp://ftp.ncbi.nlm.nih.gov/genomes/all/GCF/001/989/235/GCF_001989235.1_ASM198923v1
ftp://ftp.ncbi.nlm.nih.gov/genomes/all/GCA/002/682/615/GCA_002682615.1_ASM268261v1								ftp://ftp.ncbi.nlm.nih.gov/genomes/all/GCF/001/989/255/GCF_001989255.1_ASM198925v1
ftp://ftp.ncbi.nlm.nih.gov/genomes/all/GCA/002/682/635/GCA_002682635.1_ASM268263v1								ftp://ftp.ncbi.nlm.nih.gov/genomes/all/GCF/001/989/275/GCF_001989275.1_ASM198927v1
ftp://ftp.ncbi.nlm.nih.gov/genomes/all/GCA/002/682/655/GCA_002682655.1_ASM268265v1								ftp://ftp.ncbi.nlm.nih.gov/genomes/all/GCF/001/989/295/GCF_001989295.1_ASM198929v1
ftp://ftp.ncbi.nlm.nih.gov/genomes/all/GCA/002/682/235/GCA_002682235.1_ASM268223v1								ftp://ftp.ncbi.nlm.nih.gov/genomes/all/GCF/001/989/315/GCF_001989315.1_ASM198931v1
ftp://ftp.ncbi.nlm.nih.gov/genomes/all/GCA/002/682/555/GCA_002682555.1_ASM268255v1								ftp://ftp.ncbi.nlm.nih.gov/genomes/all/GCF/001/989/335/GCF_001989335.1_ASM198933v1
ftp://ftp.ncbi.nlm.nih.gov/genomes/all/GCA/000/930/875/GCA_000930875.1_ViralProj273464								ftp://ftp.ncbi.nlm.nih.gov/genomes/all/GCF/002/018/515/GCF_002018515.1_ASM201851v1
ftp://ftp.ncbi.nlm.nih.gov/genomes/all/GCA/002/669/695/GCA_002669695.1_ASM266969v1								ftp://ftp.ncbi.nlm.nih.gov/genomes/all/GCF/002/021/795/GCF_002021795.1_ASM202179v1
ftp://ftp.ncbi.nlm.nih.gov/genomes/all/GCA/002/669/715/GCA_002669715.1_ASM266971v1								ftp://ftp.ncbi.nlm.nih.gov/genomes/all/GCF/002/068/675/GCF_002068675.1_ASM206867v1
ftp://ftp.ncbi.nlm.nih.gov/genomes/all/GCA/002/669/735/GCA_002669735.1_ASM266973v1								ftp://ftp.ncbi.nlm.nih.gov/genomes/all/GCF/002/068/975/GCF_002068975.1_ASM206897v1
ftp://ftp.ncbi.nlm.nih.gov/genomes/all/GCA/002/669/755/GCA_002669755.1_ASM266975v1								ftp://ftp.ncbi.nlm.nih.gov/genomes/all/GCF/002/069/155/GCF_002069155.1_ASM206915v1
ftp://ftp.ncbi.nlm.nih.gov/genomes/all/GCA/002/669/775/GCA_002669775.1_ASM266977v1								ftp://ftp.ncbi.nlm.nih.gov/genomes/all/GCF/002/240/435/GCF_002240435.1_ASM224043v1
ftp://ftp.ncbi.nlm.nih.gov/genomes/all/GCA/002/669/815/GCA_002669815.1_ASM266981v1								ftp://ftp.ncbi.nlm.nih.gov/genomes/all/GCF/002/240/475/GCF_002240475.1_ASM224047v1
ftp://ftp.ncbi.nlm.nih.gov/genomes/all/GCA/001/505/075/GCA_001505075.1_ViralProj307920								ftp://ftp.ncbi.nlm.nih.gov/genomes/all/GCF/002/240/495/GCF_002240495.1_ASM224049v1
ftp://ftp.ncbi.nlm.nih.gov/genomes/all/GCA/001/505/735/GCA_001505735.1_ViralProj307921								ftp://ftp.ncbi.nlm.nih.gov/genomes/all/GCF/002/240/515/GCF_002240515.1_ASM224051v1
ftp://ftp.ncbi.nlm.nih.gov/genomes/all/GCA/002/601/525/GCA_002601525.1_ASM260152v1								ftp://ftp.ncbi.nlm.nih.gov/genomes/all/GCF/002/285/955/GCF_002285955.1_ASM228595v1
ftp://ftp.ncbi.nlm.nih.gov/genomes/all/GCA/002/669/135/GCA_002669135.1_ASM266913v1								ftp://ftp.ncbi.nlm.nih.gov/genomes/all/GCF/002/285/975/GCF_002285975.1_ASM228597v1
ftp://ftp.ncbi.nlm.nih.gov/genomes/all/GCA/002/669/155/GCA_002669155.1_ASM266915v1								ftp://ftp.ncbi.nlm.nih.gov/genomes/all/GCF/002/285/995/GCF_002285995.1_ASM228599v1
ftp://ftp.ncbi.nlm.nih.gov/genomes/all/GCA/002/669/175/GCA_002669175.1_ASM266917v1								ftp://ftp.ncbi.nlm.nih.gov/genomes/all/GCF/002/286/015/GCF_002286015.1_ASM228601v1
ftp://ftp.ncbi.nlm.nih.gov/genomes/all/GCA/002/669/195/GCA_002669195.1_ASM266919v1								ftp://ftp.ncbi.nlm.nih.gov/genomes/all/GCF/002/286/035/GCF_002286035.1_ASM228603v1
ftp://ftp.ncbi.nlm.nih.gov/genomes/all/GCA/002/669/215/GCA_002669215.1_ASM266921v1								ftp://ftp.ncbi.nlm.nih.gov/genomes/all/GCF/002/286/055/GCF_002286055.1_ASM228605v1
ftp://ftp.ncbi.nlm.nih.gov/genomes/all/GCA/002/669/235/GCA_002669235.1_ASM266923v1								ftp://ftp.ncbi.nlm.nih.gov/genomes/all/GCF/002/286/075/GCF_002286075.1_ASM228607v1
ftp://ftp.ncbi.nlm.nih.gov/genomes/all/GCA/002/669/255/GCA_002669255.1_ASM266925v1								ftp://ftp.ncbi.nlm.nih.gov/genomes/all/GCF/002/286/095/GCF_002286095.1_ASM228609v1
ftp://ftp.ncbi.nlm.nih.gov/genomes/all/GCA/000/928/515/GCA_000928515.1_ViralProj274120								ftp://ftp.ncbi.nlm.nih.gov/genomes/all/GCF/002/286/115/GCF_002286115.1_ASM228611v1
ftp://ftp.ncbi.nlm.nih.gov/genomes/all/GCA/000/954/255/GCA_000954255.1_ViralProj276855								ftp://ftp.ncbi.nlm.nih.gov/genomes/all/GCF/002/286/135/GCF_002286135.1_ASM228613v1
ftp://ftp.ncbi.nlm.nih.gov/genomes/all/GCA/000/954/335/GCA_000954335.1_ViralProj276871								ftp://ftp.ncbi.nlm.nih.gov/genomes/all/GCF/002/286/155/GCF_002286155.1_ASM228615v1
ftp://ftp.ncbi.nlm.nih.gov/genomes/all/GCA/000/955/055/GCA_000955055.1_ViralProj276870								ftp://ftp.ncbi.nlm.nih.gov/genomes/all/GCF/002/286/175/GCF_002286175.1_ASM228617v1
ftp://ftp.ncbi.nlm.nih.gov/genomes/all/GCA/001/470/775/GCA_001470775.1_ViralProj306349								ftp://ftp.ncbi.nlm.nih.gov/genomes/all/GCF/002/286/295/GCF_002286295.1_ASM228629v1
ftp://ftp.ncbi.nlm.nih.gov/genomes/all/GCA/001/503/495/GCA_001503495.1_ViralProj307927								ftp://ftp.ncbi.nlm.nih.gov/genomes/all/GCF/002/286/315/GCF_002286315.1_ASM228631v1
ftp://ftp.ncbi.nlm.nih.gov/genomes/all/GCA/001/503/515/GCA_001503515.1_ViralProj307931								ftp://ftp.ncbi.nlm.nih.gov/genomes/all/GCF/002/286/335/GCF_002286335.1_ASM228633v1
ftp://ftp.ncbi.nlm.nih.gov/genomes/all/GCA/001/504/295/GCA_001504295.1_ViralProj307926								ftp://ftp.ncbi.nlm.nih.gov/genomes/all/GCF/002/286/355/GCF_002286355.1_ASM228635v1
ftp://ftp.ncbi.nlm.nih.gov/genomes/all/GCA/001/504/315/GCA_001504315.1_ViralProj307930								ftp://ftp.ncbi.nlm.nih.gov/genomes/all/GCF/002/286/375/GCF_002286375.1_ASM228637v1
ftp://ftp.ncbi.nlm.nih.gov/genomes/all/GCA/001/505/755/GCA_001505755.1_ViralProj307925								ftp://ftp.ncbi.nlm.nih.gov/genomes/all/GCF/002/310/915/GCF_002310915.1_ASM231091v1
ftp://ftp.ncbi.nlm.nih.gov/genomes/all/GCA/001/551/405/GCA_001551405.1_ViralProj310937								ftp://ftp.ncbi.nlm.nih.gov/genomes/all/GCF/002/442/615/GCF_002442615.1_ASM244261v1
ftp://ftp.ncbi.nlm.nih.gov/genomes/all/GCA/002/605/165/GCA_002605165.1_ASM260516v1								ftp://ftp.ncbi.nlm.nih.gov/genomes/all/GCF/002/442/635/GCF_002442635.1_ASM244263v1
ftp://ftp.ncbi.nlm.nih.gov/genomes/all/GCA/002/630/085/GCA_002630085.1_ASM263008v1								ftp://ftp.ncbi.nlm.nih.gov/genomes/all/GCF/002/442/655/GCF_002442655.1_ASM244265v1
ftp://ftp.ncbi.nlm.nih.gov/genomes/all/GCA/002/601/665/GCA_002601665.1_ASM260166v1								ftp://ftp.ncbi.nlm.nih.gov/genomes/all/GCF/002/442/675/GCF_002442675.1_ASM244267v1
ftp://ftp.ncbi.nlm.nih.gov/genomes/all/GCA/000/928/315/GCA_000928315.1_ViralProj273466								ftp://ftp.ncbi.nlm.nih.gov/genomes/all/GCF/002/442/695/GCF_002442695.1_ASM244269v1
ftp://ftp.ncbi.nlm.nih.gov/genomes/all/GCA/000/929/435/GCA_000929435.1_ViralProj274586								ftp://ftp.ncbi.nlm.nih.gov/genomes/all/GCF/002/442/715/GCF_002442715.1_ASM244271v1
ftp://ftp.ncbi.nlm.nih.gov/genomes/all/GCA/000/931/335/GCA_000931335.1_ViralProj274777								ftp://ftp.ncbi.nlm.nih.gov/genomes/all/GCF/002/442/735/GCF_002442735.1_ASM244273v1
ftp://ftp.ncbi.nlm.nih.gov/genomes/all/GCA/001/505/135/GCA_001505135.1_ViralProj307932								ftp://ftp.ncbi.nlm.nih.gov/genomes/all/GCF/002/442/755/GCF_002442755.1_ASM244275v1
ftp://ftp.ncbi.nlm.nih.gov/genomes/all/GCA/000/955/395/GCA_000955395.1_ViralProj276869								ftp://ftp.ncbi.nlm.nih.gov/genomes/all/GCF/002/442/775/GCF_002442775.1_ASM244277v1
ftp://ftp.ncbi.nlm.nih.gov/genomes/all/GCA/001/505/115/GCA_001505115.1_ViralProj307928								ftp://ftp.ncbi.nlm.nih.gov/genomes/all/GCF/002/442/795/GCF_002442795.1_ASM244279v1
ftp://ftp.ncbi.nlm.nih.gov/genomes/all/GCA/001/505/775/GCA_001505775.1_ViralProj307929								ftp://ftp.ncbi.nlm.nih.gov/genomes/all/GCF/002/442/815/GCF_002442815.1_ASM244281v1
ftp://ftp.ncbi.nlm.nih.gov/genomes/all/GCA/002/620/065/GCA_002620065.1_ASM262006v1								ftp://ftp.ncbi.nlm.nih.gov/genomes/all/GCF/002/859/205/GCF_002859205.1_ASM285920v1
ftp://ftp.ncbi.nlm.nih.gov/genomes/all/GCA/002/661/855/GCA_002661855.1_ASM266185v1								ftp://ftp.ncbi.nlm.nih.gov/genomes/all/GCF/002/859/565/GCF_002859565.1_ASM285956v1
ftp://ftp.ncbi.nlm.nih.gov/genomes/all/GCA/002/661/875/GCA_002661875.1_ASM266187v1								ftp://ftp.ncbi.nlm.nih.gov/genomes/all/GCF/002/859/585/GCF_002859585.1_ASM285958v1
ftp://ftp.ncbi.nlm.nih.gov/genomes/all/GCA/002/661/895/GCA_002661895.1_ASM266189v1								ftp://ftp.ncbi.nlm.nih.gov/genomes/all/GCF/002/859/605/GCF_002859605.1_ASM285960v1
ftp://ftp.ncbi.nlm.nih.gov/genomes/all/GCA/002/661/915/GCA_002661915.1_ASM266191v1								ftp://ftp.ncbi.nlm.nih.gov/genomes/all/GCF/002/859/625/GCF_002859625.1_ASM285962v1
ftp://ftp.ncbi.nlm.nih.gov/genomes/all/GCA/002/661/935/GCA_002661935.1_ASM266193v1								ftp://ftp.ncbi.nlm.nih.gov/genomes/all/GCF/002/859/645/GCF_002859645.1_ASM285964v1
ftp://ftp.ncbi.nlm.nih.gov/genomes/all/GCA/002/661/955/GCA_002661955.1_ASM266195v1								ftp://ftp.ncbi.nlm.nih.gov/genomes/all/GCF/002/859/665/GCF_002859665.1_ASM285966v1
ftp://ftp.ncbi.nlm.nih.gov/genomes/all/GCA/002/661/995/GCA_002661995.1_ASM266199v1								ftp://ftp.ncbi.nlm.nih.gov/genomes/all/GCF/002/859/685/GCF_002859685.1_ASM285968v1
ftp://ftp.ncbi.nlm.nih.gov/genomes/all/GCA/002/662/015/GCA_002662015.1_ASM266201v1								ftp://ftp.ncbi.nlm.nih.gov/genomes/all/GCF/002/859/705/GCF_002859705.1_ASM285970v1
ftp://ftp.ncbi.nlm.nih.gov/genomes/all/GCA/002/662/035/GCA_002662035.1_ASM266203v1								ftp://ftp.ncbi.nlm.nih.gov/genomes/all/GCF/002/859/725/GCF_002859725.1_ASM285972v1
ftp://ftp.ncbi.nlm.nih.gov/genomes/all/GCA/002/662/055/GCA_002662055.1_ASM266205v1								ftp://ftp.ncbi.nlm.nih.gov/genomes/all/GCF/002/859/745/GCF_002859745.1_ASM285974v1
ftp://ftp.ncbi.nlm.nih.gov/genomes/all/GCA/002/662/075/GCA_002662075.1_ASM266207v1								ftp://ftp.ncbi.nlm.nih.gov/genomes/all/GCF/002/859/765/GCF_002859765.1_ASM285976v1
ftp://ftp.ncbi.nlm.nih.gov/genomes/all/GCA/002/662/095/GCA_002662095.1_ASM266209v1								ftp://ftp.ncbi.nlm.nih.gov/genomes/all/GCF/002/859/785/GCF_002859785.1_ASM285978v1
ftp://ftp.ncbi.nlm.nih.gov/genomes/all/GCA/002/662/115/GCA_002662115.1_ASM266211v1								ftp://ftp.ncbi.nlm.nih.gov/genomes/all/GCF/002/859/805/GCF_002859805.1_ASM285980v1
ftp://ftp.ncbi.nlm.nih.gov/genomes/all/GCA/002/662/135/GCA_002662135.1_ASM266213v1								ftp://ftp.ncbi.nlm.nih.gov/genomes/all/GCF/002/859/825/GCF_002859825.1_ASM285982v1
ftp://ftp.ncbi.nlm.nih.gov/genomes/all/GCA/002/662/155/GCA_002662155.1_ASM266215v1								ftp://ftp.ncbi.nlm.nih.gov/genomes/all/GCF/002/892/665/GCF_002892665.1_ASM289266v1
ftp://ftp.ncbi.nlm.nih.gov/genomes/all/GCA/002/662/175/GCA_002662175.1_ASM266217v1								ftp://ftp.ncbi.nlm.nih.gov/genomes/all/GCF/002/892/685/GCF_002892685.1_ASM289268v1
ftp://ftp.ncbi.nlm.nih.gov/genomes/all/GCA/002/662/215/GCA_002662215.1_ASM266221v1								ftp://ftp.ncbi.nlm.nih.gov/genomes/all/GCF/002/892/705/GCF_002892705.1_ASM289270v1
ftp://ftp.ncbi.nlm.nih.gov/genomes/all/GCA/002/662/235/GCA_002662235.1_ASM266223v1								ftp://ftp.ncbi.nlm.nih.gov/genomes/all/GCF/002/892/725/GCF_002892725.1_ASM289272v1
ftp://ftp.ncbi.nlm.nih.gov/genomes/all/GCA/002/662/255/GCA_002662255.1_ASM266225v1								ftp://ftp.ncbi.nlm.nih.gov/genomes/all/GCF/002/892/745/GCF_002892745.1_ASM289274v1
ftp://ftp.ncbi.nlm.nih.gov/genomes/all/GCA/002/662/275/GCA_002662275.1_ASM266227v1								ftp://ftp.ncbi.nlm.nih.gov/genomes/all/GCF/002/892/765/GCF_002892765.1_ASM289276v1
ftp://ftp.ncbi.nlm.nih.gov/genomes/all/GCA/002/662/295/GCA_002662295.1_ASM266229v1								ftp://ftp.ncbi.nlm.nih.gov/genomes/all/GCF/900/186/845/GCF_900186845.1_46338_E02
ftp://ftp.ncbi.nlm.nih.gov/genomes/all/GCA/002/662/315/GCA_002662315.1_ASM266231v1								ftp://ftp.ncbi.nlm.nih.gov/genomes/all/GCF/900/187/345/GCF_900187345.1_42650_A02
ftp://ftp.ncbi.nlm.nih.gov/genomes/all/GCA/002/662/335/GCA_002662335.1_ASM266233v1								ftp://ftp.ncbi.nlm.nih.gov/genomes/all/GCF/000/742/955/GCF_000742955.1_ASM74295v1
ftp://ftp.ncbi.nlm.nih.gov/genomes/all/GCA/002/662/355/GCA_002662355.1_ASM266235v1								ftp://ftp.ncbi.nlm.nih.gov/genomes/all/GCF/002/735/945/GCF_002735945.1_ASM273594v1
ftp://ftp.ncbi.nlm.nih.gov/genomes/all/GCA/002/662/375/GCA_002662375.1_ASM266237v1								ftp://ftp.ncbi.nlm.nih.gov/genomes/all/GCF/900/187/105/GCF_900187105.1_50618_F01
ftp://ftp.ncbi.nlm.nih.gov/genomes/all/GCA/002/662/395/GCA_002662395.1_ASM266239v1								ftp://ftp.ncbi.nlm.nih.gov/genomes/all/GCF/000/576/125/GCF_000576125.1_ASM57612v1
ftp://ftp.ncbi.nlm.nih.gov/genomes/all/GCA/002/662/435/GCA_002662435.1_ASM266243v1								ftp://ftp.ncbi.nlm.nih.gov/genomes/all/GCF/000/576/165/GCF_000576165.1_ASM57616v1
ftp://ftp.ncbi.nlm.nih.gov/genomes/all/GCA/002/662/455/GCA_002662455.1_ASM266245v1								ftp://ftp.ncbi.nlm.nih.gov/genomes/all/GCF/002/158/845/GCF_002158845.1_ASM215884v1
ftp://ftp.ncbi.nlm.nih.gov/genomes/all/GCA/002/662/495/GCA_002662495.1_ASM266249v1								ftp://ftp.ncbi.nlm.nih.gov/genomes/all/GCF/002/393/245/GCF_002393245.1_ASM239324v1
ftp://ftp.ncbi.nlm.nih.gov/genomes/all/GCA/002/665/195/GCA_002665195.1_ASM266519v1								ftp://ftp.ncbi.nlm.nih.gov/genomes/all/GCF/000/648/515/GCF_000648515.1_ASM64851v1
ftp://ftp.ncbi.nlm.nih.gov/genomes/all/GCA/002/665/215/GCA_002665215.1_ASM266521v1								ftp://ftp.ncbi.nlm.nih.gov/genomes/all/GCF/000/783/755/GCF_000783755.2_ASM78375v2
ftp://ftp.ncbi.nlm.nih.gov/genomes/all/GCA/002/665/355/GCA_002665355.1_ASM266535v1								ftp://ftp.ncbi.nlm.nih.gov/genomes/all/GCF/000/783/995/GCF_000783995.2_ASM78399v2
ftp://ftp.ncbi.nlm.nih.gov/genomes/all/GCA/002/665/375/GCA_002665375.1_ASM266537v1								ftp://ftp.ncbi.nlm.nih.gov/genomes/all/GCF/001/022/155/GCF_001022155.1_ASM102215v1
ftp://ftp.ncbi.nlm.nih.gov/genomes/all/GCA/002/665/395/GCA_002665395.1_ASM266539v1								ftp://ftp.ncbi.nlm.nih.gov/genomes/all/GCF/001/022/275/GCF_001022275.1_ASM102227v1
ftp://ftp.ncbi.nlm.nih.gov/genomes/all/GCA/002/665/435/GCA_002665435.1_ASM266543v1								ftp://ftp.ncbi.nlm.nih.gov/genomes/all/GCF/001/281/005/GCF_001281005.1_ASM128100v1
ftp://ftp.ncbi.nlm.nih.gov/genomes/all/GCA/002/665/455/GCA_002665455.1_ASM266545v1								ftp://ftp.ncbi.nlm.nih.gov/genomes/all/GCF/001/702/455/GCF_001702455.1_ASM170245v1
ftp://ftp.ncbi.nlm.nih.gov/genomes/all/GCA/002/665/475/GCA_002665475.1_ASM266547v1								ftp://ftp.ncbi.nlm.nih.gov/genomes/all/GCF/001/718/055/GCF_001718055.1_ASM171805v1
ftp://ftp.ncbi.nlm.nih.gov/genomes/all/GCA/002/665/495/GCA_002665495.1_ASM266549v1								ftp://ftp.ncbi.nlm.nih.gov/genomes/all/GCF/002/211/705/GCF_002211705.1_ASM221170v1
ftp://ftp.ncbi.nlm.nih.gov/genomes/all/GCA/002/665/535/GCA_002665535.1_ASM266553v1								ftp://ftp.ncbi.nlm.nih.gov/genomes/all/GCF/002/215/385/GCF_002215385.1_ASM221538v1
ftp://ftp.ncbi.nlm.nih.gov/genomes/all/GCA/002/665/555/GCA_002665555.1_ASM266555v1								ftp://ftp.ncbi.nlm.nih.gov/genomes/all/GCF/002/786/865/GCF_002786865.1_ASM278686v1
ftp://ftp.ncbi.nlm.nih.gov/genomes/all/GCA/002/665/575/GCA_002665575.1_ASM266557v1								ftp://ftp.ncbi.nlm.nih.gov/genomes/all/GCF/002/796/485/GCF_002796485.1_ASM279648v1
ftp://ftp.ncbi.nlm.nih.gov/genomes/all/GCA/002/665/595/GCA_002665595.1_ASM266559v1								ftp://ftp.ncbi.nlm.nih.gov/genomes/all/GCF/002/796/505/GCF_002796505.1_ASM279650v1
ftp://ftp.ncbi.nlm.nih.gov/genomes/all/GCA/002/665/615/GCA_002665615.1_ASM266561v1								ftp://ftp.ncbi.nlm.nih.gov/genomes/all/GCF/001/021/995/GCF_001021995.1_ASM102199v1
ftp://ftp.ncbi.nlm.nih.gov/genomes/all/GCA/002/665/635/GCA_002665635.1_ASM266563v1								ftp://ftp.ncbi.nlm.nih.gov/genomes/all/GCF/001/559/215/GCF_001559215.2_ASM155921v2
ftp://ftp.ncbi.nlm.nih.gov/genomes/all/GCA/002/665/655/GCA_002665655.1_ASM266565v1								ftp://ftp.ncbi.nlm.nih.gov/genomes/all/GCF/001/571/545/GCF_001571545.2_ASM157154v2
ftp://ftp.ncbi.nlm.nih.gov/genomes/all/GCA/002/665/675/GCA_002665675.1_ASM266567v1								ftp://ftp.ncbi.nlm.nih.gov/genomes/all/GCF/002/591/115/GCF_002591115.1_ASM259111v1
ftp://ftp.ncbi.nlm.nih.gov/genomes/all/GCA/002/665/695/GCA_002665695.1_ASM266569v1								ftp://ftp.ncbi.nlm.nih.gov/genomes/all/GCF/002/796/405/GCF_002796405.1_ASM279640v1
ftp://ftp.ncbi.nlm.nih.gov/genomes/all/GCA/002/665/715/GCA_002665715.1_ASM266571v1								ftp://ftp.ncbi.nlm.nih.gov/genomes/all/GCF/002/796/425/GCF_002796425.1_ASM279642v1
ftp://ftp.ncbi.nlm.nih.gov/genomes/all/GCA/002/665/775/GCA_002665775.1_ASM266577v1								ftp://ftp.ncbi.nlm.nih.gov/genomes/all/GCF/002/796/525/GCF_002796525.1_ASM279652v1
ftp://ftp.ncbi.nlm.nih.gov/genomes/all/GCA/002/665/795/GCA_002665795.1_ASM266579v1								ftp://ftp.ncbi.nlm.nih.gov/genomes/all/GCF/001/709/315/GCF_001709315.1_ASM170931v1
ftp://ftp.ncbi.nlm.nih.gov/genomes/all/GCA/002/665/815/GCA_002665815.1_ASM266581v1								ftp://ftp.ncbi.nlm.nih.gov/genomes/all/GCF/000/724/505/GCF_000724505.1_ASM72450v1
ftp://ftp.ncbi.nlm.nih.gov/genomes/all/GCA/002/665/835/GCA_002665835.1_ASM266583v1								ftp://ftp.ncbi.nlm.nih.gov/genomes/all/GCF/000/770/155/GCF_000770155.1_ASM77015v1
ftp://ftp.ncbi.nlm.nih.gov/genomes/all/GCA/002/665/855/GCA_002665855.1_ASM266585v1								ftp://ftp.ncbi.nlm.nih.gov/genomes/all/GCF/000/784/865/GCF_000784865.1_ASM78486v1
ftp://ftp.ncbi.nlm.nih.gov/genomes/all/GCA/002/665/875/GCA_002665875.1_ASM266587v1								ftp://ftp.ncbi.nlm.nih.gov/genomes/all/GCF/000/784/905/GCF_000784905.1_ASM78490v1
ftp://ftp.ncbi.nlm.nih.gov/genomes/all/GCA/002/665/895/GCA_002665895.1_ASM266589v1								ftp://ftp.ncbi.nlm.nih.gov/genomes/all/GCF/001/022/015/GCF_001022015.1_ASM102201v1
ftp://ftp.ncbi.nlm.nih.gov/genomes/all/GCA/002/665/915/GCA_002665915.1_ASM266591v1								ftp://ftp.ncbi.nlm.nih.gov/genomes/all/GCF/001/022/055/GCF_001022055.1_ASM102205v1
ftp://ftp.ncbi.nlm.nih.gov/genomes/all/GCA/002/665/935/GCA_002665935.1_ASM266593v1								ftp://ftp.ncbi.nlm.nih.gov/genomes/all/GCF/001/022/075/GCF_001022075.1_ASM102207v1
ftp://ftp.ncbi.nlm.nih.gov/genomes/all/GCA/002/665/955/GCA_002665955.1_ASM266595v1								ftp://ftp.ncbi.nlm.nih.gov/genomes/all/GCF/001/022/255/GCF_001022255.1_ASM102225v1
ftp://ftp.ncbi.nlm.nih.gov/genomes/all/GCA/002/665/995/GCA_002665995.1_ASM266599v1								ftp://ftp.ncbi.nlm.nih.gov/genomes/all/GCF/001/029/645/GCF_001029645.1_ASM102964v1
ftp://ftp.ncbi.nlm.nih.gov/genomes/all/GCA/002/666/015/GCA_002666015.1_ASM266601v1								ftp://ftp.ncbi.nlm.nih.gov/genomes/all/GCF/001/922/365/GCF_001922365.1_ASM192236v1
ftp://ftp.ncbi.nlm.nih.gov/genomes/all/GCA/002/666/035/GCA_002666035.1_ASM266603v1								ftp://ftp.ncbi.nlm.nih.gov/genomes/all/GCF/002/007/805/GCF_002007805.1_ASM200780v1
ftp://ftp.ncbi.nlm.nih.gov/genomes/all/GCA/002/666/055/GCA_002666055.1_ASM266605v1								ftp://ftp.ncbi.nlm.nih.gov/genomes/all/GCF/002/025/685/GCF_002025685.1_ASM202568v1
ftp://ftp.ncbi.nlm.nih.gov/genomes/all/GCA/000/928/575/GCA_000928575.1_ViralProj274798								ftp://ftp.ncbi.nlm.nih.gov/genomes/all/GCF/002/055/735/GCF_002055735.1_ASM205573v1
ftp://ftp.ncbi.nlm.nih.gov/genomes/all/GCA/001/470/475/GCA_001470475.1_ViralProj306348								ftp://ftp.ncbi.nlm.nih.gov/genomes/all/GCF/002/192/355/GCF_002192355.1_ASM219235v1
ftp://ftp.ncbi.nlm.nih.gov/genomes/all/GCA/001/505/295/GCA_001505295.1_ViralProj307964								ftp://ftp.ncbi.nlm.nih.gov/genomes/all/GCF/002/192/395/GCF_002192395.1_ASM219239v1
ftp://ftp.ncbi.nlm.nih.gov/genomes/all/GCA/002/633/215/GCA_002633215.1_ASM263321v1								ftp://ftp.ncbi.nlm.nih.gov/genomes/all/GCF/002/197/345/GCF_002197345.1_ASM219734v1
ftp://ftp.ncbi.nlm.nih.gov/genomes/all/GCA/001/041/515/GCA_001041515.1_ViralProj287990								ftp://ftp.ncbi.nlm.nih.gov/genomes/all/GCF/002/201/815/GCF_002201815.1_ASM220181v1
ftp://ftp.ncbi.nlm.nih.gov/genomes/all/GCA/000/931/155/GCA_000931155.1_ViralProj275612								ftp://ftp.ncbi.nlm.nih.gov/genomes/all/GCF/002/204/775/GCF_002204775.1_ASM220477v1
ftp://ftp.ncbi.nlm.nih.gov/genomes/all/GCA/002/644/835/GCA_002644835.1_ASM264483v1								ftp://ftp.ncbi.nlm.nih.gov/genomes/all/GCF/002/211/685/GCF_002211685.1_ASM221168v1
ftp://ftp.ncbi.nlm.nih.gov/genomes/all/GCA/002/645/055/GCA_002645055.1_ASM264505v1								ftp://ftp.ncbi.nlm.nih.gov/genomes/all/GCF/002/237/465/GCF_002237465.1_ASM223746v1
ftp://ftp.ncbi.nlm.nih.gov/genomes/all/GCA/002/647/075/GCA_002647075.1_ASM264707v1								ftp://ftp.ncbi.nlm.nih.gov/genomes/all/GCF/002/303/275/GCF_002303275.1_ASM230327v1
ftp://ftp.ncbi.nlm.nih.gov/genomes/all/GCA/000/954/975/GCA_000954975.2_ViralProj276851								ftp://ftp.ncbi.nlm.nih.gov/genomes/all/GCF/002/803/865/GCF_002803865.1_ASM280386v1
ftp://ftp.ncbi.nlm.nih.gov/genomes/all/GCA/001/470/935/GCA_001470935.1_ViralProj306299								ftp://ftp.ncbi.nlm.nih.gov/genomes/all/GCF/000/270/125/GCF_000270125.2_ASM27012v2
ftp://ftp.ncbi.nlm.nih.gov/genomes/all/GCA/001/503/435/GCA_001503435.1_ViralProj307915								ftp://ftp.ncbi.nlm.nih.gov/genomes/all/GCF/001/543/055/GCF_001543055.1_ASM154305v1
ftp://ftp.ncbi.nlm.nih.gov/genomes/all/GCA/001/503/455/GCA_001503455.1_ViralProj307919								ftp://ftp.ncbi.nlm.nih.gov/genomes/all/GCF/002/224/585/GCF_002224585.1_ASM222458v1
ftp://ftp.ncbi.nlm.nih.gov/genomes/all/GCA/001/503/475/GCA_001503475.1_ViralProj307923								ftp://ftp.ncbi.nlm.nih.gov/genomes/all/GCF/001/932/635/GCF_001932635.1_ASM193263v1
ftp://ftp.ncbi.nlm.nih.gov/genomes/all/GCA/001/504/275/GCA_001504275.1_ViralProj307922								ftp://ftp.ncbi.nlm.nih.gov/genomes/all/GCF/002/068/115/GCF_002068115.1_ASM206811v1
ftp://ftp.ncbi.nlm.nih.gov/genomes/all/GCA/001/505/055/GCA_001505055.1_ViralProj307916								ftp://ftp.ncbi.nlm.nih.gov/genomes/all/GCF/002/764/035/GCF_002764035.1_ASM276403v1
ftp://ftp.ncbi.nlm.nih.gov/genomes/all/GCA/001/505/095/GCA_001505095.1_ViralProj307924								ftp://ftp.ncbi.nlm.nih.gov/genomes/all/GCF/000/219/515/GCF_000219515.2_ASM21951v3
ftp://ftp.ncbi.nlm.nih.gov/genomes/all/GCA/001/551/725/GCA_001551725.1_ViralProj310936								ftp://ftp.ncbi.nlm.nih.gov/genomes/all/GCF/000/285/655/GCF_000285655.3_EC958.v1
ftp://ftp.ncbi.nlm.nih.gov/genomes/all/GCA/002/605/385/GCA_002605385.1_ASM260538v1								ftp://ftp.ncbi.nlm.nih.gov/genomes/all/GCF/000/464/955/GCF_000464955.2_ASM46495v2
ftp://ftp.ncbi.nlm.nih.gov/genomes/all/GCA/002/605/465/GCA_002605465.1_ASM260546v1								ftp://ftp.ncbi.nlm.nih.gov/genomes/all/GCF/000/520/035/GCF_000520035.1_ASM52003v1
ftp://ftp.ncbi.nlm.nih.gov/genomes/all/GCA/002/617/305/GCA_002617305.1_ASM261730v1								ftp://ftp.ncbi.nlm.nih.gov/genomes/all/GCF/000/520/055/GCF_000520055.1_ASM52005v1
ftp://ftp.ncbi.nlm.nih.gov/genomes/all/GCA/000/943/625/GCA_000943625.1_ViralProj276252								ftp://ftp.ncbi.nlm.nih.gov/genomes/all/GCF/000/597/845/GCF_000597845.1_ASM59784v1
ftp://ftp.ncbi.nlm.nih.gov/genomes/all/GCA/002/676/395/GCA_002676395.1_ASM267639v1								ftp://ftp.ncbi.nlm.nih.gov/genomes/all/GCF/000/599/625/GCF_000599625.1_ASM59962v1
ftp://ftp.ncbi.nlm.nih.gov/genomes/all/GCA/000/968/995/GCA_000968995.1_ViralProj280292								ftp://ftp.ncbi.nlm.nih.gov/genomes/all/GCF/000/599/645/GCF_000599645.1_ASM59964v1
ftp://ftp.ncbi.nlm.nih.gov/genomes/all/GCA/000/969/035/GCA_000969035.1_ViralProj280305								ftp://ftp.ncbi.nlm.nih.gov/genomes/all/GCF/000/599/665/GCF_000599665.1_ASM59966v1
ftp://ftp.ncbi.nlm.nih.gov/genomes/all/GCA/000/969/095/GCA_000969095.1_ViralProj280306								ftp://ftp.ncbi.nlm.nih.gov/genomes/all/GCF/000/599/685/GCF_000599685.1_ASM59968v1
ftp://ftp.ncbi.nlm.nih.gov/genomes/all/GCA/000/969/155/GCA_000969155.1_ViralProj280307								ftp://ftp.ncbi.nlm.nih.gov/genomes/all/GCF/000/599/705/GCF_000599705.1_ASM59970v1
ftp://ftp.ncbi.nlm.nih.gov/genomes/all/GCA/000/969/215/GCA_000969215.1_ViralProj280304								ftp://ftp.ncbi.nlm.nih.gov/genomes/all/GCF/000/662/395/GCF_000662395.1_ASM66239v1
ftp://ftp.ncbi.nlm.nih.gov/genomes/all/GCA/000/970/605/GCA_000970605.1_ViralProj279594								ftp://ftp.ncbi.nlm.nih.gov/genomes/all/GCF/000/671/295/GCF_000671295.1_ASM67129v1
ftp://ftp.ncbi.nlm.nih.gov/genomes/all/GCA/002/604/485/GCA_002604485.1_ASM260448v1								ftp://ftp.ncbi.nlm.nih.gov/genomes/all/GCF/000/714/595/GCF_000714595.1_ASM71459v1
ftp://ftp.ncbi.nlm.nih.gov/genomes/all/GCA/002/827/785/GCA_002827785.1_ASM282778v1								ftp://ftp.ncbi.nlm.nih.gov/genomes/all/GCF/000/725/305/GCF_000725305.1_ASM72530v1
ftp://ftp.ncbi.nlm.nih.gov/genomes/all/GCA/002/677/375/GCA_002677375.1_ASM267737v1								ftp://ftp.ncbi.nlm.nih.gov/genomes/all/GCF/000/730/345/GCF_000730345.1_ASM73034v1
ftp://ftp.ncbi.nlm.nih.gov/genomes/all/GCA/002/677/975/GCA_002677975.1_ASM267797v1								ftp://ftp.ncbi.nlm.nih.gov/genomes/all/GCF/000/732/965/GCF_000732965.1_ASM73296v1
ftp://ftp.ncbi.nlm.nih.gov/genomes/all/GCA/001/041/695/GCA_001041695.1_ViralProj288026								ftp://ftp.ncbi.nlm.nih.gov/genomes/all/GCF/000/743/255/GCF_000743255.1_ASM74325v1
ftp://ftp.ncbi.nlm.nih.gov/genomes/all/GCA/001/504/255/GCA_001504255.1_ViralProj307918								ftp://ftp.ncbi.nlm.nih.gov/genomes/all/GCF/000/750/555/GCF_000750555.1_ASM75055v1
ftp://ftp.ncbi.nlm.nih.gov/genomes/all/GCA/000/954/895/GCA_000954895.1_ViralProj277518								ftp://ftp.ncbi.nlm.nih.gov/genomes/all/GCF/000/784/925/GCF_000784925.1_ASM78492v1
ftp://ftp.ncbi.nlm.nih.gov/genomes/all/GCA/001/015/285/GCA_001015285.1_ViralProj285253								ftp://ftp.ncbi.nlm.nih.gov/genomes/all/GCF/000/800/215/GCF_000800215.1_ASM80021v1
ftp://ftp.ncbi.nlm.nih.gov/genomes/all/GCA/001/500/655/GCA_001500655.1_ViralProj307762								ftp://ftp.ncbi.nlm.nih.gov/genomes/all/GCF/000/800/765/GCF_000800765.1_ASM80076v1
ftp://ftp.ncbi.nlm.nih.gov/genomes/all/GCA/001/501/315/GCA_001501315.1_ViralProj307763								ftp://ftp.ncbi.nlm.nih.gov/genomes/all/GCF/000/801/165/GCF_000801165.1_ASM80116v1
ftp://ftp.ncbi.nlm.nih.gov/genomes/all/GCA/001/041/855/GCA_001041855.1_ViralProj287987								ftp://ftp.ncbi.nlm.nih.gov/genomes/all/GCF/000/801/185/GCF_000801185.2_ASM80118v2
ftp://ftp.ncbi.nlm.nih.gov/genomes/all/GCA/001/042/215/GCA_001042215.1_ViralProj287988								ftp://ftp.ncbi.nlm.nih.gov/genomes/all/GCF/000/801/205/GCF_000801205.1_ASM80120v1
ftp://ftp.ncbi.nlm.nih.gov/genomes/all/GCA/001/041/335/GCA_001041335.1_ViralProj287865								ftp://ftp.ncbi.nlm.nih.gov/genomes/all/GCF/000/803/705/GCF_000803705.1_ASM80370v1
ftp://ftp.ncbi.nlm.nih.gov/genomes/all/GCA/001/308/795/GCA_001308795.2_ViralProj298062								ftp://ftp.ncbi.nlm.nih.gov/genomes/all/GCF/000/813/165/GCF_000813165.1_ASM81316v1
ftp://ftp.ncbi.nlm.nih.gov/genomes/all/GCA/001/501/295/GCA_001501295.1_ViralProj307759								ftp://ftp.ncbi.nlm.nih.gov/genomes/all/GCF/000/814/145/GCF_000814145.2_ASM81414v2
ftp://ftp.ncbi.nlm.nih.gov/genomes/all/GCA/001/501/635/GCA_001501635.1_ViralProj307827								ftp://ftp.ncbi.nlm.nih.gov/genomes/all/GCF/000/819/645/GCF_000819645.1_ASM81964v1
ftp://ftp.ncbi.nlm.nih.gov/genomes/all/GCA/001/501/655/GCA_001501655.1_ViralProj307831								ftp://ftp.ncbi.nlm.nih.gov/genomes/all/GCF/000/827/105/GCF_000827105.1_ASM82710v1
ftp://ftp.ncbi.nlm.nih.gov/genomes/all/GCA/001/502/695/GCA_001502695.1_ViralProj307761								ftp://ftp.ncbi.nlm.nih.gov/genomes/all/GCF/000/829/985/GCF_000829985.1_ASM82998v1
ftp://ftp.ncbi.nlm.nih.gov/genomes/all/GCA/002/605/545/GCA_002605545.1_ASM260554v1								ftp://ftp.ncbi.nlm.nih.gov/genomes/all/GCF/000/830/035/GCF_000830035.1_ASM83003v1
ftp://ftp.ncbi.nlm.nih.gov/genomes/all/GCA/002/605/565/GCA_002605565.1_ASM260556v1								ftp://ftp.ncbi.nlm.nih.gov/genomes/all/GCF/000/831/565/GCF_000831565.1_ASM83156v1
ftp://ftp.ncbi.nlm.nih.gov/genomes/all/GCA/001/041/075/GCA_001041075.1_ViralProj287977								ftp://ftp.ncbi.nlm.nih.gov/genomes/all/GCF/000/833/145/GCF_000833145.1_ASM83314v1
ftp://ftp.ncbi.nlm.nih.gov/genomes/all/GCA/002/666/655/GCA_002666655.1_ASM266665v1								ftp://ftp.ncbi.nlm.nih.gov/genomes/all/GCF/000/833/635/GCF_000833635.2_ASM83363v2
ftp://ftp.ncbi.nlm.nih.gov/genomes/all/GCA/002/666/695/GCA_002666695.1_ASM266669v1								ftp://ftp.ncbi.nlm.nih.gov/genomes/all/GCF/000/931/565/GCF_000931565.1_ASM93156v1
ftp://ftp.ncbi.nlm.nih.gov/genomes/all/GCA/002/666/715/GCA_002666715.1_ASM266671v1								ftp://ftp.ncbi.nlm.nih.gov/genomes/all/GCF/000/952/955/GCF_000952955.1_EcRV308Chr
ftp://ftp.ncbi.nlm.nih.gov/genomes/all/GCA/002/666/735/GCA_002666735.1_ASM266673v1								ftp://ftp.ncbi.nlm.nih.gov/genomes/all/GCF/000/953/515/GCF_000953515.1_EcHMS174Chr
ftp://ftp.ncbi.nlm.nih.gov/genomes/all/GCA/002/666/755/GCA_002666755.1_ASM266675v1								ftp://ftp.ncbi.nlm.nih.gov/genomes/all/GCF/000/967/155/GCF_000967155.2_HUSEC2011CHR1
ftp://ftp.ncbi.nlm.nih.gov/genomes/all/GCA/002/666/775/GCA_002666775.1_ASM266677v1								ftp://ftp.ncbi.nlm.nih.gov/genomes/all/GCF/000/968/515/GCF_000968515.1_ASM96851v1
ftp://ftp.ncbi.nlm.nih.gov/genomes/all/GCA/002/666/795/GCA_002666795.1_ASM266679v1								ftp://ftp.ncbi.nlm.nih.gov/genomes/all/GCF/000/971/615/GCF_000971615.1_ASM97161v1
ftp://ftp.ncbi.nlm.nih.gov/genomes/all/GCA/002/666/815/GCA_002666815.1_ASM266681v1								ftp://ftp.ncbi.nlm.nih.gov/genomes/all/GCF/000/974/405/GCF_000974405.1_ASM97440v1
ftp://ftp.ncbi.nlm.nih.gov/genomes/all/GCA/002/666/835/GCA_002666835.1_ASM266683v1								ftp://ftp.ncbi.nlm.nih.gov/genomes/all/GCF/000/974/465/GCF_000974465.1_ASM97446v1
ftp://ftp.ncbi.nlm.nih.gov/genomes/all/GCA/002/666/855/GCA_002666855.1_ASM266685v1								ftp://ftp.ncbi.nlm.nih.gov/genomes/all/GCF/000/974/505/GCF_000974505.1_ASM97450v1
ftp://ftp.ncbi.nlm.nih.gov/genomes/all/GCA/002/666/875/GCA_002666875.1_ASM266687v1								ftp://ftp.ncbi.nlm.nih.gov/genomes/all/GCF/000/974/535/GCF_000974535.1_ASM97453v1
ftp://ftp.ncbi.nlm.nih.gov/genomes/all/GCA/002/666/915/GCA_002666915.1_ASM266691v1								ftp://ftp.ncbi.nlm.nih.gov/genomes/all/GCF/000/974/575/GCF_000974575.1_ASM97457v1
ftp://ftp.ncbi.nlm.nih.gov/genomes/all/GCA/002/666/935/GCA_002666935.1_ASM266693v1								ftp://ftp.ncbi.nlm.nih.gov/genomes/all/GCF/000/974/825/GCF_000974825.1_ASM97482v1
ftp://ftp.ncbi.nlm.nih.gov/genomes/all/GCA/002/666/955/GCA_002666955.1_ASM266695v1								ftp://ftp.ncbi.nlm.nih.gov/genomes/all/GCF/000/974/865/GCF_000974865.1_ASM97486v1
ftp://ftp.ncbi.nlm.nih.gov/genomes/all/GCA/002/660/015/GCA_002660015.1_ASM266001v1								ftp://ftp.ncbi.nlm.nih.gov/genomes/all/GCF/000/974/885/GCF_000974885.1_ASM97488v1
ftp://ftp.ncbi.nlm.nih.gov/genomes/all/GCA/002/660/035/GCA_002660035.1_ASM266003v1								ftp://ftp.ncbi.nlm.nih.gov/genomes/all/GCF/000/981/485/GCF_000981485.1_EcoliK12AG100
ftp://ftp.ncbi.nlm.nih.gov/genomes/all/GCA/002/660/055/GCA_002660055.1_ASM266005v1								ftp://ftp.ncbi.nlm.nih.gov/genomes/all/GCF/000/986/765/GCF_000986765.1_ASM98676v1
ftp://ftp.ncbi.nlm.nih.gov/genomes/all/GCA/002/667/935/GCA_002667935.1_ASM266793v1								ftp://ftp.ncbi.nlm.nih.gov/genomes/all/GCF/000/987/875/GCF_000987875.1_ASM98787v1
ftp://ftp.ncbi.nlm.nih.gov/genomes/all/GCA/002/667/955/GCA_002667955.1_ASM266795v1								ftp://ftp.ncbi.nlm.nih.gov/genomes/all/GCF/000/988/355/GCF_000988355.1_ASM98835v1
ftp://ftp.ncbi.nlm.nih.gov/genomes/all/GCA/002/667/975/GCA_002667975.1_ASM266797v1								ftp://ftp.ncbi.nlm.nih.gov/genomes/all/GCF/000/988/385/GCF_000988385.1_ASM98838v1
ftp://ftp.ncbi.nlm.nih.gov/genomes/all/GCA/002/667/995/GCA_002667995.1_ASM266799v1								ftp://ftp.ncbi.nlm.nih.gov/genomes/all/GCF/000/988/465/GCF_000988465.1_ASM98846v1
ftp://ftp.ncbi.nlm.nih.gov/genomes/all/GCA/001/505/715/GCA_001505715.1_ViralProj307917								ftp://ftp.ncbi.nlm.nih.gov/genomes/all/GCF/001/007/915/GCF_001007915.1_ASM100791v1
ftp://ftp.ncbi.nlm.nih.gov/genomes/all/GCA/001/501/675/GCA_001501675.1_ViralProj307835								ftp://ftp.ncbi.nlm.nih.gov/genomes/all/GCF/001/020/945/GCF_001020945.2_ASM102094v2
ftp://ftp.ncbi.nlm.nih.gov/genomes/all/GCA/001/504/675/GCA_001504675.1_ViralProj307836								ftp://ftp.ncbi.nlm.nih.gov/genomes/all/GCF/001/021/005/GCF_001021005.2_ASM102100v2
ftp://ftp.ncbi.nlm.nih.gov/genomes/all/GCA/001/503/655/GCA_001503655.1_ViralProj307959								ftp://ftp.ncbi.nlm.nih.gov/genomes/all/GCF/001/021/595/GCF_001021595.1_ASM102159v1
ftp://ftp.ncbi.nlm.nih.gov/genomes/all/GCA/001/504/455/GCA_001504455.1_ViralProj307958								ftp://ftp.ncbi.nlm.nih.gov/genomes/all/GCF/001/021/615/GCF_001021615.1_APECO18
ftp://ftp.ncbi.nlm.nih.gov/genomes/all/GCA/002/670/895/GCA_002670895.1_ASM267089v1								ftp://ftp.ncbi.nlm.nih.gov/genomes/all/GCF/001/021/635/GCF_001021635.1_ASM102163v1
ftp://ftp.ncbi.nlm.nih.gov/genomes/all/GCA/002/675/675/GCA_002675675.1_ASM267567v1								ftp://ftp.ncbi.nlm.nih.gov/genomes/all/GCF/001/029/125/GCF_001029125.1_ASM102912v1
ftp://ftp.ncbi.nlm.nih.gov/genomes/all/GCA/002/634/835/GCA_002634835.1_ASM263483v1								ftp://ftp.ncbi.nlm.nih.gov/genomes/all/GCF/001/039/415/GCF_001039415.1_ASM103941v1
ftp://ftp.ncbi.nlm.nih.gov/genomes/all/GCA/002/634/955/GCA_002634955.1_ASM263495v1								ftp://ftp.ncbi.nlm.nih.gov/genomes/all/GCF/001/043/215/GCF_001043215.1_ASM104321v1
ftp://ftp.ncbi.nlm.nih.gov/genomes/all/GCA/002/636/195/GCA_002636195.1_ASM263619v1								ftp://ftp.ncbi.nlm.nih.gov/genomes/all/GCF/001/051/135/GCF_001051135.1_ASM105113v1
ftp://ftp.ncbi.nlm.nih.gov/genomes/all/GCA/002/636/225/GCA_002636225.1_ASM263622v1								ftp://ftp.ncbi.nlm.nih.gov/genomes/all/GCF/001/183/645/GCF_001183645.1_ASM118364v1
ftp://ftp.ncbi.nlm.nih.gov/genomes/all/GCA/002/636/315/GCA_002636315.1_ASM263631v1								ftp://ftp.ncbi.nlm.nih.gov/genomes/all/GCF/001/183/665/GCF_001183665.1_ASM118366v1
ftp://ftp.ncbi.nlm.nih.gov/genomes/all/GCA/002/636/415/GCA_002636415.1_ASM263641v1								ftp://ftp.ncbi.nlm.nih.gov/genomes/all/GCF/001/183/685/GCF_001183685.1_ASM118368v1
ftp://ftp.ncbi.nlm.nih.gov/genomes/all/GCA/002/642/735/GCA_002642735.1_ASM264273v1								ftp://ftp.ncbi.nlm.nih.gov/genomes/all/GCF/001/276/585/GCF_001276585.2_ASM127658v2
ftp://ftp.ncbi.nlm.nih.gov/genomes/all/GCA/002/645/815/GCA_002645815.1_ASM264581v1								ftp://ftp.ncbi.nlm.nih.gov/genomes/all/GCF/001/280/325/GCF_001280325.1_ASM128032v1
ftp://ftp.ncbi.nlm.nih.gov/genomes/all/GCA/002/645/855/GCA_002645855.1_ASM264585v1								ftp://ftp.ncbi.nlm.nih.gov/genomes/all/GCF/001/280/345/GCF_001280345.1_ASM128034v1
ftp://ftp.ncbi.nlm.nih.gov/genomes/all/GCA/002/645/975/GCA_002645975.1_ASM264597v1								ftp://ftp.ncbi.nlm.nih.gov/genomes/all/GCF/001/280/385/GCF_001280385.1_ASM128038v1
ftp://ftp.ncbi.nlm.nih.gov/genomes/all/GCA/002/646/055/GCA_002646055.1_ASM264605v1								ftp://ftp.ncbi.nlm.nih.gov/genomes/all/GCF/001/280/405/GCF_001280405.1_ASM128040v1
ftp://ftp.ncbi.nlm.nih.gov/genomes/all/GCA/002/646/095/GCA_002646095.1_ASM264609v1								ftp://ftp.ncbi.nlm.nih.gov/genomes/all/GCF/001/307/215/GCF_001307215.1_ASM130721v1
ftp://ftp.ncbi.nlm.nih.gov/genomes/all/GCA/002/646/115/GCA_002646115.1_ASM264611v1								ftp://ftp.ncbi.nlm.nih.gov/genomes/all/GCF/001/308/065/GCF_001308065.1_ASM130806v1
ftp://ftp.ncbi.nlm.nih.gov/genomes/all/GCA/002/646/135/GCA_002646135.1_ASM264613v1								ftp://ftp.ncbi.nlm.nih.gov/genomes/all/GCF/001/308/125/GCF_001308125.1_ASM130812v1
ftp://ftp.ncbi.nlm.nih.gov/genomes/all/GCA/002/646/195/GCA_002646195.1_ASM264619v1								ftp://ftp.ncbi.nlm.nih.gov/genomes/all/GCF/001/308/165/GCF_001308165.1_ASM130816v1
ftp://ftp.ncbi.nlm.nih.gov/genomes/all/GCA/002/646/235/GCA_002646235.1_ASM264623v1								ftp://ftp.ncbi.nlm.nih.gov/genomes/all/GCF/001/420/935/GCF_001420935.1_ASM142093v1
ftp://ftp.ncbi.nlm.nih.gov/genomes/all/GCA/002/646/255/GCA_002646255.1_ASM264625v1								ftp://ftp.ncbi.nlm.nih.gov/genomes/all/GCF/001/420/955/GCF_001420955.1_ASM142095v1
ftp://ftp.ncbi.nlm.nih.gov/genomes/all/GCA/002/646/995/GCA_002646995.1_ASM264699v1								ftp://ftp.ncbi.nlm.nih.gov/genomes/all/GCF/001/442/495/GCF_001442495.1_ASM144249v1
ftp://ftp.ncbi.nlm.nih.gov/genomes/all/GCA/002/647/115/GCA_002647115.1_ASM264711v1								ftp://ftp.ncbi.nlm.nih.gov/genomes/all/GCF/001/455/385/GCF_001455385.1_ASM145538v1
ftp://ftp.ncbi.nlm.nih.gov/genomes/all/GCA/002/655/555/GCA_002655555.1_ASM265555v1								ftp://ftp.ncbi.nlm.nih.gov/genomes/all/GCF/001/469/815/GCF_001469815.1_ASM146981v1
ftp://ftp.ncbi.nlm.nih.gov/genomes/all/GCA/002/655/595/GCA_002655595.1_ASM265559v1								ftp://ftp.ncbi.nlm.nih.gov/genomes/all/GCF/001/485/455/GCF_001485455.1_ASM148545v1
ftp://ftp.ncbi.nlm.nih.gov/genomes/all/GCA/002/655/655/GCA_002655655.1_ASM265565v1								ftp://ftp.ncbi.nlm.nih.gov/genomes/all/GCF/001/513/615/GCF_001513615.1_ASM151361v1
ftp://ftp.ncbi.nlm.nih.gov/genomes/all/GCA/002/655/975/GCA_002655975.1_ASM265597v1								ftp://ftp.ncbi.nlm.nih.gov/genomes/all/GCF/001/513/635/GCF_001513635.1_ASM151363v1
ftp://ftp.ncbi.nlm.nih.gov/genomes/all/GCA/002/656/155/GCA_002656155.1_ASM265615v1								ftp://ftp.ncbi.nlm.nih.gov/genomes/all/GCF/001/515/725/GCF_001515725.1_ASM151572v1
ftp://ftp.ncbi.nlm.nih.gov/genomes/all/GCA/002/656/415/GCA_002656415.1_ASM265641v1								ftp://ftp.ncbi.nlm.nih.gov/genomes/all/GCF/001/544/635/GCF_001544635.1_ASM154463v1
ftp://ftp.ncbi.nlm.nih.gov/genomes/all/GCA/002/656/435/GCA_002656435.1_ASM265643v1								ftp://ftp.ncbi.nlm.nih.gov/genomes/all/GCF/001/558/995/GCF_001558995.2_ASM155899v2
ftp://ftp.ncbi.nlm.nih.gov/genomes/all/GCA/002/656/495/GCA_002656495.1_ASM265649v1								ftp://ftp.ncbi.nlm.nih.gov/genomes/all/GCF/001/559/615/GCF_001559615.2_ASM155961v2
ftp://ftp.ncbi.nlm.nih.gov/genomes/all/GCA/002/656/635/GCA_002656635.1_ASM265663v1								ftp://ftp.ncbi.nlm.nih.gov/genomes/all/GCF/001/559/635/GCF_001559635.1_ASM155963v1
ftp://ftp.ncbi.nlm.nih.gov/genomes/all/GCA/002/656/755/GCA_002656755.1_ASM265675v1								ftp://ftp.ncbi.nlm.nih.gov/genomes/all/GCF/001/559/655/GCF_001559655.1_ASM155965v1
ftp://ftp.ncbi.nlm.nih.gov/genomes/all/GCA/002/656/895/GCA_002656895.1_ASM265689v1								ftp://ftp.ncbi.nlm.nih.gov/genomes/all/GCF/001/559/675/GCF_001559675.1_ASM155967v1
ftp://ftp.ncbi.nlm.nih.gov/genomes/all/GCA/002/657/635/GCA_002657635.1_ASM265763v1								ftp://ftp.ncbi.nlm.nih.gov/genomes/all/GCF/001/566/335/GCF_001566335.1_ASM156633v1
ftp://ftp.ncbi.nlm.nih.gov/genomes/all/GCA/002/657/715/GCA_002657715.1_ASM265771v1								ftp://ftp.ncbi.nlm.nih.gov/genomes/all/GCF/001/566/615/GCF_001566615.1_ASM156661v1
ftp://ftp.ncbi.nlm.nih.gov/genomes/all/GCA/002/657/775/GCA_002657775.1_ASM265777v1								ftp://ftp.ncbi.nlm.nih.gov/genomes/all/GCF/001/566/635/GCF_001566635.1_ASM156663v1
ftp://ftp.ncbi.nlm.nih.gov/genomes/all/GCA/002/657/795/GCA_002657795.1_ASM265779v1								ftp://ftp.ncbi.nlm.nih.gov/genomes/all/GCF/001/566/675/GCF_001566675.1_ASM156667v1
ftp://ftp.ncbi.nlm.nih.gov/genomes/all/GCA/002/657/815/GCA_002657815.1_ASM265781v1								ftp://ftp.ncbi.nlm.nih.gov/genomes/all/GCF/001/577/325/GCF_001577325.1_ASM157732v1
ftp://ftp.ncbi.nlm.nih.gov/genomes/all/GCA/002/657/895/GCA_002657895.1_ASM265789v1								ftp://ftp.ncbi.nlm.nih.gov/genomes/all/GCF/001/593/565/GCF_001593565.1_ASM159356v1
ftp://ftp.ncbi.nlm.nih.gov/genomes/all/GCA/002/658/015/GCA_002658015.1_ASM265801v1								ftp://ftp.ncbi.nlm.nih.gov/genomes/all/GCF/001/610/755/GCF_001610755.1_ASM161075v1
ftp://ftp.ncbi.nlm.nih.gov/genomes/all/GCA/002/658/055/GCA_002658055.1_ASM265805v1								ftp://ftp.ncbi.nlm.nih.gov/genomes/all/GCF/001/612/475/GCF_001612475.1_ASM161247v1
ftp://ftp.ncbi.nlm.nih.gov/genomes/all/GCA/002/658/155/GCA_002658155.1_ASM265815v1								ftp://ftp.ncbi.nlm.nih.gov/genomes/all/GCF/001/612/495/GCF_001612495.1_ASM161249v1
ftp://ftp.ncbi.nlm.nih.gov/genomes/all/GCA/002/658/175/GCA_002658175.1_ASM265817v1								ftp://ftp.ncbi.nlm.nih.gov/genomes/all/GCF/001/617/565/GCF_001617565.1_ASM161756v1
ftp://ftp.ncbi.nlm.nih.gov/genomes/all/GCA/002/658/275/GCA_002658275.1_ASM265827v1								ftp://ftp.ncbi.nlm.nih.gov/genomes/all/GCF/001/618/325/GCF_001618325.1_ASM161832v1
ftp://ftp.ncbi.nlm.nih.gov/genomes/all/GCA/002/658/475/GCA_002658475.1_ASM265847v1								ftp://ftp.ncbi.nlm.nih.gov/genomes/all/GCF/001/618/345/GCF_001618345.2_ASM161834v2
ftp://ftp.ncbi.nlm.nih.gov/genomes/all/GCA/002/658/535/GCA_002658535.1_ASM265853v1								ftp://ftp.ncbi.nlm.nih.gov/genomes/all/GCF/001/618/365/GCF_001618365.1_ASM161836v1
ftp://ftp.ncbi.nlm.nih.gov/genomes/all/GCA/002/658/555/GCA_002658555.1_ASM265855v1								ftp://ftp.ncbi.nlm.nih.gov/genomes/all/GCF/001/644/725/GCF_001644725.1_ASM164472v1
ftp://ftp.ncbi.nlm.nih.gov/genomes/all/GCA/002/658/675/GCA_002658675.1_ASM265867v1								ftp://ftp.ncbi.nlm.nih.gov/genomes/all/GCF/001/644/745/GCF_001644745.1_ASM164474v1
ftp://ftp.ncbi.nlm.nih.gov/genomes/all/GCA/002/658/695/GCA_002658695.1_ASM265869v1								ftp://ftp.ncbi.nlm.nih.gov/genomes/all/GCF/001/650/275/GCF_001650275.1_ASM165027v1
ftp://ftp.ncbi.nlm.nih.gov/genomes/all/GCA/002/658/835/GCA_002658835.1_ASM265883v1								ftp://ftp.ncbi.nlm.nih.gov/genomes/all/GCF/001/650/295/GCF_001650295.1_ASM165029v1
ftp://ftp.ncbi.nlm.nih.gov/genomes/all/GCA/002/659/035/GCA_002659035.1_ASM265903v1								ftp://ftp.ncbi.nlm.nih.gov/genomes/all/GCF/001/651/925/GCF_001651925.2_ASM165192v2
ftp://ftp.ncbi.nlm.nih.gov/genomes/all/GCA/002/659/055/GCA_002659055.1_ASM265905v1								ftp://ftp.ncbi.nlm.nih.gov/genomes/all/GCF/001/651/945/GCF_001651945.2_ASM165194v2
ftp://ftp.ncbi.nlm.nih.gov/genomes/all/GCA/002/667/695/GCA_002667695.1_ASM266769v1								ftp://ftp.ncbi.nlm.nih.gov/genomes/all/GCF/001/651/965/GCF_001651965.2_ASM165196v2
ftp://ftp.ncbi.nlm.nih.gov/genomes/all/GCA/002/667/715/GCA_002667715.1_ASM266771v1								ftp://ftp.ncbi.nlm.nih.gov/genomes/all/GCF/001/660/565/GCF_001660565.1_ASM166056v1
ftp://ftp.ncbi.nlm.nih.gov/genomes/all/GCA/002/682/735/GCA_002682735.1_ASM268273v1								ftp://ftp.ncbi.nlm.nih.gov/genomes/all/GCF/001/660/585/GCF_001660585.1_ASM166058v1
ftp://ftp.ncbi.nlm.nih.gov/genomes/all/GCA/001/500/635/GCA_001500635.1_ViralProj307758								ftp://ftp.ncbi.nlm.nih.gov/genomes/all/GCF/001/663/075/GCF_001663075.1_ASM166307v1
ftp://ftp.ncbi.nlm.nih.gov/genomes/all/GCA/001/501/615/GCA_001501615.1_ViralProj307823								ftp://ftp.ncbi.nlm.nih.gov/genomes/all/GCF/001/663/475/GCF_001663475.1_ASM166347v1
ftp://ftp.ncbi.nlm.nih.gov/genomes/all/GCA/001/502/675/GCA_001502675.1_ViralProj307757								ftp://ftp.ncbi.nlm.nih.gov/genomes/all/GCF/001/675/145/GCF_001675145.1_ASM167514v1
ftp://ftp.ncbi.nlm.nih.gov/genomes/all/GCA/001/503/035/GCA_001503035.1_ViralProj307829								ftp://ftp.ncbi.nlm.nih.gov/genomes/all/GCF/001/677/475/GCF_001677475.1_ASM167747v1
ftp://ftp.ncbi.nlm.nih.gov/genomes/all/GCA/001/503/835/GCA_001503835.1_ViralProj307830								ftp://ftp.ncbi.nlm.nih.gov/genomes/all/GCF/001/677/495/GCF_001677495.1_ASM167749v1
ftp://ftp.ncbi.nlm.nih.gov/genomes/all/GCA/001/504/635/GCA_001504635.1_ViralProj307828								ftp://ftp.ncbi.nlm.nih.gov/genomes/all/GCF/001/677/515/GCF_001677515.1_ASM167751v1
ftp://ftp.ncbi.nlm.nih.gov/genomes/all/GCA/001/506/035/GCA_001506035.1_ViralProj308015								ftp://ftp.ncbi.nlm.nih.gov/genomes/all/GCF/001/678/925/GCF_001678925.1_ASM167892v1
ftp://ftp.ncbi.nlm.nih.gov/genomes/all/GCA/001/534/595/GCA_001534595.1_ViralProj308884								ftp://ftp.ncbi.nlm.nih.gov/genomes/all/GCF/001/678/965/GCF_001678965.1_ASM167896v1
ftp://ftp.ncbi.nlm.nih.gov/genomes/all/GCA/001/550/525/GCA_001550525.1_ViralProj310902								ftp://ftp.ncbi.nlm.nih.gov/genomes/all/GCF/001/679/985/GCF_001679985.1_ASM167998v1
ftp://ftp.ncbi.nlm.nih.gov/genomes/all/GCA/001/551/705/GCA_001551705.1_ViralProj310932								ftp://ftp.ncbi.nlm.nih.gov/genomes/all/GCF/001/682/305/GCF_001682305.2_ASM168230v2
ftp://ftp.ncbi.nlm.nih.gov/genomes/all/GCA/002/149/345/GCA_002149345.1_ViralProj266637.9								ftp://ftp.ncbi.nlm.nih.gov/genomes/all/GCF/001/683/435/GCF_001683435.1_ASM168343v1
ftp://ftp.ncbi.nlm.nih.gov/genomes/all/GCA/002/605/665/GCA_002605665.1_ASM260566v1								ftp://ftp.ncbi.nlm.nih.gov/genomes/all/GCF/001/693/315/GCF_001693315.1_ASM169331v1
ftp://ftp.ncbi.nlm.nih.gov/genomes/all/GCA/002/640/375/GCA_002640375.1_ASM264037v1								ftp://ftp.ncbi.nlm.nih.gov/genomes/all/GCF/001/693/635/GCF_001693635.1_ASM169363v1
ftp://ftp.ncbi.nlm.nih.gov/genomes/all/GCA/002/640/455/GCA_002640455.1_ASM264045v1								ftp://ftp.ncbi.nlm.nih.gov/genomes/all/GCF/001/695/515/GCF_001695515.1_ASM169551v1
ftp://ftp.ncbi.nlm.nih.gov/genomes/all/GCA/002/640/535/GCA_002640535.1_ASM264053v1								ftp://ftp.ncbi.nlm.nih.gov/genomes/all/GCF/001/721/125/GCF_001721125.1_ASM172112v1
ftp://ftp.ncbi.nlm.nih.gov/genomes/all/GCA/000/973/395/GCA_000973395.2_ViralMultiSegProj281402								ftp://ftp.ncbi.nlm.nih.gov/genomes/all/GCF/001/721/225/GCF_001721225.1_ASM172122v1
ftp://ftp.ncbi.nlm.nih.gov/genomes/all/GCA/000/982/305/GCA_000982305.1_ViralProj282477								ftp://ftp.ncbi.nlm.nih.gov/genomes/all/GCF/001/721/525/GCF_001721525.1_ASM172152v1
ftp://ftp.ncbi.nlm.nih.gov/genomes/all/GCA/000/982/325/GCA_000982325.1_ViralProj282474								ftp://ftp.ncbi.nlm.nih.gov/genomes/all/GCF/001/723/505/GCF_001723505.1_ASM172350v1
ftp://ftp.ncbi.nlm.nih.gov/genomes/all/GCA/000/982/345/GCA_000982345.1_ViralProj282478								ftp://ftp.ncbi.nlm.nih.gov/genomes/all/GCF/001/735/705/GCF_001735705.1_ASM173570v1
ftp://ftp.ncbi.nlm.nih.gov/genomes/all/GCA/000/982/365/GCA_000982365.1_ViralProj282475								ftp://ftp.ncbi.nlm.nih.gov/genomes/all/GCF/001/750/845/GCF_001750845.1_ASM175084v1
ftp://ftp.ncbi.nlm.nih.gov/genomes/all/GCA/000/982/385/GCA_000982385.1_ViralProj282479								ftp://ftp.ncbi.nlm.nih.gov/genomes/all/GCF/001/753/445/GCF_001753445.1_ASM175344v1
ftp://ftp.ncbi.nlm.nih.gov/genomes/all/GCA/001/019/915/GCA_001019915.1_ViralProj284772								ftp://ftp.ncbi.nlm.nih.gov/genomes/all/GCF/001/753/465/GCF_001753465.1_ASM175346v1
ftp://ftp.ncbi.nlm.nih.gov/genomes/all/GCA/001/019/995/GCA_001019995.1_ViralProj285603								ftp://ftp.ncbi.nlm.nih.gov/genomes/all/GCF/001/753/485/GCF_001753485.1_ASM175348v1
ftp://ftp.ncbi.nlm.nih.gov/genomes/all/GCA/002/595/605/GCA_002595605.1_ASM259560v1								ftp://ftp.ncbi.nlm.nih.gov/genomes/all/GCF/001/753/505/GCF_001753505.1_ASM175350v1
ftp://ftp.ncbi.nlm.nih.gov/genomes/all/GCA/002/604/645/GCA_002604645.1_ASM260464v1								ftp://ftp.ncbi.nlm.nih.gov/genomes/all/GCF/001/753/525/GCF_001753525.1_ASM175352v1
ftp://ftp.ncbi.nlm.nih.gov/genomes/all/GCA/002/596/865/GCA_002596865.1_ASM259686v1								ftp://ftp.ncbi.nlm.nih.gov/genomes/all/GCF/001/753/545/GCF_001753545.1_ASM175354v1
ftp://ftp.ncbi.nlm.nih.gov/genomes/all/GCA/002/595/625/GCA_002595625.1_ASM259562v1								ftp://ftp.ncbi.nlm.nih.gov/genomes/all/GCF/001/753/565/GCF_001753565.1_ASM175356v1
ftp://ftp.ncbi.nlm.nih.gov/genomes/all/GCA/002/593/785/GCA_002593785.1_ASM259378v1								ftp://ftp.ncbi.nlm.nih.gov/genomes/all/GCF/001/806/265/GCF_001806265.1_ASM180626v1
ftp://ftp.ncbi.nlm.nih.gov/genomes/all/GCA/002/534/635/GCA_002534635.1_ASM253463v1								ftp://ftp.ncbi.nlm.nih.gov/genomes/all/GCF/001/806/285/GCF_001806285.1_ASM180628v1
ftp://ftp.ncbi.nlm.nih.gov/genomes/all/GCA/002/534/655/GCA_002534655.1_ASM253465v1								ftp://ftp.ncbi.nlm.nih.gov/genomes/all/GCF/001/860/505/GCF_001860505.1_ASM186050v1
ftp://ftp.ncbi.nlm.nih.gov/genomes/all/GCA/002/593/805/GCA_002593805.1_ASM259380v1								ftp://ftp.ncbi.nlm.nih.gov/genomes/all/GCF/001/865/295/GCF_001865295.1_ASM186529v1
ftp://ftp.ncbi.nlm.nih.gov/genomes/all/GCA/002/595/645/GCA_002595645.1_ASM259564v1								ftp://ftp.ncbi.nlm.nih.gov/genomes/all/GCF/001/874/485/GCF_001874485.1_ASM187448v1
ftp://ftp.ncbi.nlm.nih.gov/genomes/all/GCA/002/596/885/GCA_002596885.1_ASM259688v1								ftp://ftp.ncbi.nlm.nih.gov/genomes/all/GCF/001/886/535/GCF_001886535.1_ASM188653v1
ftp://ftp.ncbi.nlm.nih.gov/genomes/all/GCA/002/596/905/GCA_002596905.1_ASM259690v1								ftp://ftp.ncbi.nlm.nih.gov/genomes/all/GCF/001/886/555/GCF_001886555.1_ASM188655v1
ftp://ftp.ncbi.nlm.nih.gov/genomes/all/GCA/002/595/665/GCA_002595665.1_ASM259566v1								ftp://ftp.ncbi.nlm.nih.gov/genomes/all/GCF/001/886/575/GCF_001886575.1_ASM188657v1
ftp://ftp.ncbi.nlm.nih.gov/genomes/all/GCA/002/593/825/GCA_002593825.1_ASM259382v1								ftp://ftp.ncbi.nlm.nih.gov/genomes/all/GCF/001/886/755/GCF_001886755.1_ASM188675v1
ftp://ftp.ncbi.nlm.nih.gov/genomes/all/GCA/002/548/135/GCA_002548135.1_ASM254813v1								ftp://ftp.ncbi.nlm.nih.gov/genomes/all/GCF/001/886/935/GCF_001886935.1_ASM188693v1
ftp://ftp.ncbi.nlm.nih.gov/genomes/all/GCA/002/548/155/GCA_002548155.1_ASM254815v1								ftp://ftp.ncbi.nlm.nih.gov/genomes/all/GCF/001/888/075/GCF_001888075.1_ASM188807v1
ftp://ftp.ncbi.nlm.nih.gov/genomes/all/GCA/002/593/845/GCA_002593845.1_ASM259384v1								ftp://ftp.ncbi.nlm.nih.gov/genomes/all/GCF/001/890/205/GCF_001890205.1_ASM189020v1
ftp://ftp.ncbi.nlm.nih.gov/genomes/all/GCA/002/595/685/GCA_002595685.1_ASM259568v1								ftp://ftp.ncbi.nlm.nih.gov/genomes/all/GCF/001/890/225/GCF_001890225.1_ASM189022v1
ftp://ftp.ncbi.nlm.nih.gov/genomes/all/GCA/002/596/925/GCA_002596925.1_ASM259692v1								ftp://ftp.ncbi.nlm.nih.gov/genomes/all/GCF/001/890/245/GCF_001890245.1_ASM189024v1
ftp://ftp.ncbi.nlm.nih.gov/genomes/all/GCA/002/596/945/GCA_002596945.1_ASM259694v1								ftp://ftp.ncbi.nlm.nih.gov/genomes/all/GCF/001/890/265/GCF_001890265.1_ASM189026v1
ftp://ftp.ncbi.nlm.nih.gov/genomes/all/GCA/002/595/705/GCA_002595705.1_ASM259570v1								ftp://ftp.ncbi.nlm.nih.gov/genomes/all/GCF/001/890/285/GCF_001890285.1_ASM189028v1
ftp://ftp.ncbi.nlm.nih.gov/genomes/all/GCA/002/593/865/GCA_002593865.1_ASM259386v1								ftp://ftp.ncbi.nlm.nih.gov/genomes/all/GCF/001/890/305/GCF_001890305.1_ASM189030v1
ftp://ftp.ncbi.nlm.nih.gov/genomes/all/GCA/002/548/185/GCA_002548185.1_ASM254818v1								ftp://ftp.ncbi.nlm.nih.gov/genomes/all/GCF/001/890/325/GCF_001890325.1_ASM189032v1
ftp://ftp.ncbi.nlm.nih.gov/genomes/all/GCA/002/548/215/GCA_002548215.1_ASM254821v1								ftp://ftp.ncbi.nlm.nih.gov/genomes/all/GCF/001/890/345/GCF_001890345.1_ASM189034v1
ftp://ftp.ncbi.nlm.nih.gov/genomes/all/GCA/002/593/885/GCA_002593885.1_ASM259388v1								ftp://ftp.ncbi.nlm.nih.gov/genomes/all/GCF/001/890/365/GCF_001890365.1_ASM189036v1
ftp://ftp.ncbi.nlm.nih.gov/genomes/all/GCA/002/595/725/GCA_002595725.1_ASM259572v1								ftp://ftp.ncbi.nlm.nih.gov/genomes/all/GCF/001/900/295/GCF_001900295.1_ASM190029v1
ftp://ftp.ncbi.nlm.nih.gov/genomes/all/GCA/002/596/965/GCA_002596965.1_ASM259696v1								ftp://ftp.ncbi.nlm.nih.gov/genomes/all/GCF/001/900/315/GCF_001900315.1_ASM190031v1
ftp://ftp.ncbi.nlm.nih.gov/genomes/all/GCA/002/596/985/GCA_002596985.1_ASM259698v1								ftp://ftp.ncbi.nlm.nih.gov/genomes/all/GCF/001/900/335/GCF_001900335.1_ASM190033v1
ftp://ftp.ncbi.nlm.nih.gov/genomes/all/GCA/002/595/745/GCA_002595745.1_ASM259574v1								ftp://ftp.ncbi.nlm.nih.gov/genomes/all/GCF/001/900/355/GCF_001900355.1_ASM190035v1
ftp://ftp.ncbi.nlm.nih.gov/genomes/all/GCA/002/593/905/GCA_002593905.1_ASM259390v1								ftp://ftp.ncbi.nlm.nih.gov/genomes/all/GCF/001/900/375/GCF_001900375.1_ASM190037v1
ftp://ftp.ncbi.nlm.nih.gov/genomes/all/GCA/002/548/235/GCA_002548235.1_ASM254823v1								ftp://ftp.ncbi.nlm.nih.gov/genomes/all/GCF/001/900/395/GCF_001900395.1_ASM190039v1
ftp://ftp.ncbi.nlm.nih.gov/genomes/all/GCA/002/548/275/GCA_002548275.1_ASM254827v1								ftp://ftp.ncbi.nlm.nih.gov/genomes/all/GCF/001/900/415/GCF_001900415.1_ASM190041v1
ftp://ftp.ncbi.nlm.nih.gov/genomes/all/GCA/002/593/925/GCA_002593925.1_ASM259392v1								ftp://ftp.ncbi.nlm.nih.gov/genomes/all/GCF/001/900/435/GCF_001900435.1_ASM190043v1
ftp://ftp.ncbi.nlm.nih.gov/genomes/all/GCA/002/595/765/GCA_002595765.1_ASM259576v1								ftp://ftp.ncbi.nlm.nih.gov/genomes/all/GCF/001/900/455/GCF_001900455.1_ASM190045v1
ftp://ftp.ncbi.nlm.nih.gov/genomes/all/GCA/002/597/005/GCA_002597005.1_ASM259700v1								ftp://ftp.ncbi.nlm.nih.gov/genomes/all/GCF/001/900/475/GCF_001900475.1_ASM190047v1
ftp://ftp.ncbi.nlm.nih.gov/genomes/all/GCA/002/597/025/GCA_002597025.1_ASM259702v1								ftp://ftp.ncbi.nlm.nih.gov/genomes/all/GCF/001/900/495/GCF_001900495.1_ASM190049v1
ftp://ftp.ncbi.nlm.nih.gov/genomes/all/GCA/002/595/785/GCA_002595785.1_ASM259578v1								ftp://ftp.ncbi.nlm.nih.gov/genomes/all/GCF/001/900/515/GCF_001900515.1_ASM190051v1
ftp://ftp.ncbi.nlm.nih.gov/genomes/all/GCA/002/593/945/GCA_002593945.1_ASM259394v1								ftp://ftp.ncbi.nlm.nih.gov/genomes/all/GCF/001/900/535/GCF_001900535.1_ASM190053v1
ftp://ftp.ncbi.nlm.nih.gov/genomes/all/GCA/002/548/325/GCA_002548325.1_ASM254832v1								ftp://ftp.ncbi.nlm.nih.gov/genomes/all/GCF/001/900/555/GCF_001900555.1_ASM190055v1
ftp://ftp.ncbi.nlm.nih.gov/genomes/all/GCA/002/548/365/GCA_002548365.1_ASM254836v1								ftp://ftp.ncbi.nlm.nih.gov/genomes/all/GCF/001/900/575/GCF_001900575.1_ASM190057v1
ftp://ftp.ncbi.nlm.nih.gov/genomes/all/GCA/002/593/965/GCA_002593965.1_ASM259396v1								ftp://ftp.ncbi.nlm.nih.gov/genomes/all/GCF/001/900/595/GCF_001900595.1_ASM190059v1
ftp://ftp.ncbi.nlm.nih.gov/genomes/all/GCA/002/595/805/GCA_002595805.1_ASM259580v1								ftp://ftp.ncbi.nlm.nih.gov/genomes/all/GCF/001/900/615/GCF_001900615.1_ASM190061v1
ftp://ftp.ncbi.nlm.nih.gov/genomes/all/GCA/002/597/045/GCA_002597045.1_ASM259704v1								ftp://ftp.ncbi.nlm.nih.gov/genomes/all/GCF/001/900/635/GCF_001900635.1_ASM190063v1
ftp://ftp.ncbi.nlm.nih.gov/genomes/all/GCA/002/597/065/GCA_002597065.1_ASM259706v1								ftp://ftp.ncbi.nlm.nih.gov/genomes/all/GCF/001/900/655/GCF_001900655.1_ASM190065v1
ftp://ftp.ncbi.nlm.nih.gov/genomes/all/GCA/002/595/825/GCA_002595825.1_ASM259582v1								ftp://ftp.ncbi.nlm.nih.gov/genomes/all/GCF/001/900/675/GCF_001900675.1_ASM190067v1
ftp://ftp.ncbi.nlm.nih.gov/genomes/all/GCA/002/593/985/GCA_002593985.1_ASM259398v1								ftp://ftp.ncbi.nlm.nih.gov/genomes/all/GCF/001/900/695/GCF_001900695.1_ASM190069v1
ftp://ftp.ncbi.nlm.nih.gov/genomes/all/GCA/002/548/405/GCA_002548405.1_ASM254840v1								ftp://ftp.ncbi.nlm.nih.gov/genomes/all/GCF/001/900/715/GCF_001900715.1_ASM190071v1
ftp://ftp.ncbi.nlm.nih.gov/genomes/all/GCA/002/548/435/GCA_002548435.1_ASM254843v1								ftp://ftp.ncbi.nlm.nih.gov/genomes/all/GCF/001/900/735/GCF_001900735.1_ASM190073v1
ftp://ftp.ncbi.nlm.nih.gov/genomes/all/GCA/002/594/005/GCA_002594005.1_ASM259400v1								ftp://ftp.ncbi.nlm.nih.gov/genomes/all/GCF/001/900/775/GCF_001900775.1_ASM190077v1
ftp://ftp.ncbi.nlm.nih.gov/genomes/all/GCA/002/595/845/GCA_002595845.1_ASM259584v1								ftp://ftp.ncbi.nlm.nih.gov/genomes/all/GCF/001/900/795/GCF_001900795.1_ASM190079v1
ftp://ftp.ncbi.nlm.nih.gov/genomes/all/GCA/002/597/085/GCA_002597085.1_ASM259708v1								ftp://ftp.ncbi.nlm.nih.gov/genomes/all/GCF/001/900/815/GCF_001900815.1_ASM190081v1
ftp://ftp.ncbi.nlm.nih.gov/genomes/all/GCA/002/597/105/GCA_002597105.1_ASM259710v1								ftp://ftp.ncbi.nlm.nih.gov/genomes/all/GCF/001/900/835/GCF_001900835.1_ASM190083v1
ftp://ftp.ncbi.nlm.nih.gov/genomes/all/GCA/002/595/865/GCA_002595865.1_ASM259586v1								ftp://ftp.ncbi.nlm.nih.gov/genomes/all/GCF/001/900/885/GCF_001900885.1_ASM190088v1
ftp://ftp.ncbi.nlm.nih.gov/genomes/all/GCA/002/594/025/GCA_002594025.1_ASM259402v1								ftp://ftp.ncbi.nlm.nih.gov/genomes/all/GCF/001/900/905/GCF_001900905.1_ASM190090v1
ftp://ftp.ncbi.nlm.nih.gov/genomes/all/GCA/002/548/475/GCA_002548475.1_ASM254847v1								ftp://ftp.ncbi.nlm.nih.gov/genomes/all/GCF/001/900/925/GCF_001900925.1_ASM190092v1
ftp://ftp.ncbi.nlm.nih.gov/genomes/all/GCA/002/548/515/GCA_002548515.1_ASM254851v1								ftp://ftp.ncbi.nlm.nih.gov/genomes/all/GCF/001/900/945/GCF_001900945.1_ASM190094v1
ftp://ftp.ncbi.nlm.nih.gov/genomes/all/GCA/002/594/045/GCA_002594045.1_ASM259404v1								ftp://ftp.ncbi.nlm.nih.gov/genomes/all/GCF/001/900/965/GCF_001900965.1_ASM190096v1
ftp://ftp.ncbi.nlm.nih.gov/genomes/all/GCA/002/595/885/GCA_002595885.1_ASM259588v1								ftp://ftp.ncbi.nlm.nih.gov/genomes/all/GCF/001/900/985/GCF_001900985.1_ASM190098v1
ftp://ftp.ncbi.nlm.nih.gov/genomes/all/GCA/002/597/125/GCA_002597125.1_ASM259712v1								ftp://ftp.ncbi.nlm.nih.gov/genomes/all/GCF/001/901/005/GCF_001901005.1_ASM190100v1
ftp://ftp.ncbi.nlm.nih.gov/genomes/all/GCA/002/597/145/GCA_002597145.1_ASM259714v1								ftp://ftp.ncbi.nlm.nih.gov/genomes/all/GCF/001/901/025/GCF_001901025.1_ASM190102v1
ftp://ftp.ncbi.nlm.nih.gov/genomes/all/GCA/002/595/905/GCA_002595905.1_ASM259590v1								ftp://ftp.ncbi.nlm.nih.gov/genomes/all/GCF/001/901/045/GCF_001901045.1_ASM190104v1
ftp://ftp.ncbi.nlm.nih.gov/genomes/all/GCA/002/594/065/GCA_002594065.1_ASM259406v1								ftp://ftp.ncbi.nlm.nih.gov/genomes/all/GCF/001/901/065/GCF_001901065.1_ASM190106v1
ftp://ftp.ncbi.nlm.nih.gov/genomes/all/GCA/002/548/555/GCA_002548555.1_ASM254855v1								ftp://ftp.ncbi.nlm.nih.gov/genomes/all/GCF/001/901/085/GCF_001901085.1_ASM190108v1
ftp://ftp.ncbi.nlm.nih.gov/genomes/all/GCA/002/548/575/GCA_002548575.1_ASM254857v1								ftp://ftp.ncbi.nlm.nih.gov/genomes/all/GCF/001/901/105/GCF_001901105.1_ASM190110v1
ftp://ftp.ncbi.nlm.nih.gov/genomes/all/GCA/002/594/085/GCA_002594085.1_ASM259408v1								ftp://ftp.ncbi.nlm.nih.gov/genomes/all/GCF/001/901/125/GCF_001901125.1_ASM190112v1
ftp://ftp.ncbi.nlm.nih.gov/genomes/all/GCA/002/595/925/GCA_002595925.1_ASM259592v1								ftp://ftp.ncbi.nlm.nih.gov/genomes/all/GCF/001/901/145/GCF_001901145.1_ASM190114v1
ftp://ftp.ncbi.nlm.nih.gov/genomes/all/GCA/002/597/165/GCA_002597165.1_ASM259716v1								ftp://ftp.ncbi.nlm.nih.gov/genomes/all/GCF/001/901/165/GCF_001901165.1_ASM190116v1
ftp://ftp.ncbi.nlm.nih.gov/genomes/all/GCA/002/597/185/GCA_002597185.1_ASM259718v1								ftp://ftp.ncbi.nlm.nih.gov/genomes/all/GCF/001/901/185/GCF_001901185.1_ASM190118v1
ftp://ftp.ncbi.nlm.nih.gov/genomes/all/GCA/002/595/945/GCA_002595945.1_ASM259594v1								ftp://ftp.ncbi.nlm.nih.gov/genomes/all/GCF/001/901/215/GCF_001901215.1_ASM190121v1
ftp://ftp.ncbi.nlm.nih.gov/genomes/all/GCA/002/594/105/GCA_002594105.1_ASM259410v1								ftp://ftp.ncbi.nlm.nih.gov/genomes/all/GCF/001/901/315/GCF_001901315.1_ASM190131v1
ftp://ftp.ncbi.nlm.nih.gov/genomes/all/GCA/002/548/615/GCA_002548615.1_ASM254861v1								ftp://ftp.ncbi.nlm.nih.gov/genomes/all/GCF/001/901/365/GCF_001901365.1_ASM190136v1
ftp://ftp.ncbi.nlm.nih.gov/genomes/all/GCA/002/548/655/GCA_002548655.1_ASM254865v1								ftp://ftp.ncbi.nlm.nih.gov/genomes/all/GCF/001/901/405/GCF_001901405.1_ASM190140v1
ftp://ftp.ncbi.nlm.nih.gov/genomes/all/GCA/002/594/125/GCA_002594125.1_ASM259412v1								ftp://ftp.ncbi.nlm.nih.gov/genomes/all/GCF/001/901/425/GCF_001901425.1_ASM190142v1
ftp://ftp.ncbi.nlm.nih.gov/genomes/all/GCA/002/595/965/GCA_002595965.1_ASM259596v1								ftp://ftp.ncbi.nlm.nih.gov/genomes/all/GCF/001/901/445/GCF_001901445.1_ASM190144v1
ftp://ftp.ncbi.nlm.nih.gov/genomes/all/GCA/002/595/985/GCA_002595985.1_ASM259598v1								ftp://ftp.ncbi.nlm.nih.gov/genomes/all/GCF/001/901/465/GCF_001901465.1_ASM190146v1
ftp://ftp.ncbi.nlm.nih.gov/genomes/all/GCA/002/594/145/GCA_002594145.1_ASM259414v1								ftp://ftp.ncbi.nlm.nih.gov/genomes/all/GCF/001/932/515/GCF_001932515.1_ASM193251v1
ftp://ftp.ncbi.nlm.nih.gov/genomes/all/GCA/002/548/685/GCA_002548685.1_ASM254868v1								ftp://ftp.ncbi.nlm.nih.gov/genomes/all/GCF/001/936/315/GCF_001936315.1_ASM193631v1
ftp://ftp.ncbi.nlm.nih.gov/genomes/all/GCA/002/548/725/GCA_002548725.1_ASM254872v1								ftp://ftp.ncbi.nlm.nih.gov/genomes/all/GCF/001/969/285/GCF_001969285.1_ASM196928v1
ftp://ftp.ncbi.nlm.nih.gov/genomes/all/GCA/002/594/165/GCA_002594165.1_ASM259416v1								ftp://ftp.ncbi.nlm.nih.gov/genomes/all/GCF/001/999/185/GCF_001999185.1_ASM199918v1
ftp://ftp.ncbi.nlm.nih.gov/genomes/all/GCA/002/596/005/GCA_002596005.1_ASM259600v1								ftp://ftp.ncbi.nlm.nih.gov/genomes/all/GCF/002/007/705/GCF_002007705.1_ASM200770v1
ftp://ftp.ncbi.nlm.nih.gov/genomes/all/GCA/002/596/025/GCA_002596025.1_ASM259602v1								ftp://ftp.ncbi.nlm.nih.gov/genomes/all/GCF/002/009/315/GCF_002009315.1_ASM200931v1
ftp://ftp.ncbi.nlm.nih.gov/genomes/all/GCA/002/594/185/GCA_002594185.1_ASM259418v1								ftp://ftp.ncbi.nlm.nih.gov/genomes/all/GCF/002/011/945/GCF_002011945.1_ASM201194v1
ftp://ftp.ncbi.nlm.nih.gov/genomes/all/GCA/002/548/765/GCA_002548765.1_ASM254876v1								ftp://ftp.ncbi.nlm.nih.gov/genomes/all/GCF/002/011/965/GCF_002011965.1_ASM201196v1
ftp://ftp.ncbi.nlm.nih.gov/genomes/all/GCA/002/548/785/GCA_002548785.1_ASM254878v1								ftp://ftp.ncbi.nlm.nih.gov/genomes/all/GCF/002/011/985/GCF_002011985.1_ASM201198v1
ftp://ftp.ncbi.nlm.nih.gov/genomes/all/GCA/002/594/205/GCA_002594205.1_ASM259420v1								ftp://ftp.ncbi.nlm.nih.gov/genomes/all/GCF/002/012/005/GCF_002012005.1_ASM201200v1
ftp://ftp.ncbi.nlm.nih.gov/genomes/all/GCA/002/596/045/GCA_002596045.1_ASM259604v1								ftp://ftp.ncbi.nlm.nih.gov/genomes/all/GCF/002/012/025/GCF_002012025.1_ASM201202v1
ftp://ftp.ncbi.nlm.nih.gov/genomes/all/GCA/002/594/225/GCA_002594225.1_ASM259422v1								ftp://ftp.ncbi.nlm.nih.gov/genomes/all/GCF/002/012/045/GCF_002012045.1_ASM201204v1
ftp://ftp.ncbi.nlm.nih.gov/genomes/all/GCA/002/603/765/GCA_002603765.1_ASM260376v1								ftp://ftp.ncbi.nlm.nih.gov/genomes/all/GCF/002/012/065/GCF_002012065.1_ASM201206v1
ftp://ftp.ncbi.nlm.nih.gov/genomes/all/GCA/002/548/815/GCA_002548815.1_ASM254881v1								ftp://ftp.ncbi.nlm.nih.gov/genomes/all/GCF/002/012/085/GCF_002012085.1_ASM201208v1
ftp://ftp.ncbi.nlm.nih.gov/genomes/all/GCA/002/548/835/GCA_002548835.1_ASM254883v1								ftp://ftp.ncbi.nlm.nih.gov/genomes/all/GCF/002/012/105/GCF_002012105.1_ASM201210v1
ftp://ftp.ncbi.nlm.nih.gov/genomes/all/GCA/002/594/245/GCA_002594245.1_ASM259424v1								ftp://ftp.ncbi.nlm.nih.gov/genomes/all/GCF/002/012/125/GCF_002012125.1_ASM201212v1
ftp://ftp.ncbi.nlm.nih.gov/genomes/all/GCA/002/594/265/GCA_002594265.1_ASM259426v1								ftp://ftp.ncbi.nlm.nih.gov/genomes/all/GCF/002/012/145/GCF_002012145.1_ASM201214v1
ftp://ftp.ncbi.nlm.nih.gov/genomes/all/GCA/002/548/855/GCA_002548855.1_ASM254885v1								ftp://ftp.ncbi.nlm.nih.gov/genomes/all/GCF/002/012/165/GCF_002012165.1_ASM201216v1
ftp://ftp.ncbi.nlm.nih.gov/genomes/all/GCA/002/548/875/GCA_002548875.1_ASM254887v1								ftp://ftp.ncbi.nlm.nih.gov/genomes/all/GCF/002/012/185/GCF_002012185.1_ASM201218v1
ftp://ftp.ncbi.nlm.nih.gov/genomes/all/GCA/002/594/285/GCA_002594285.1_ASM259428v1								ftp://ftp.ncbi.nlm.nih.gov/genomes/all/GCF/002/012/205/GCF_002012205.1_ASM201220v1
ftp://ftp.ncbi.nlm.nih.gov/genomes/all/GCA/002/594/305/GCA_002594305.1_ASM259430v1								ftp://ftp.ncbi.nlm.nih.gov/genomes/all/GCF/002/012/225/GCF_002012225.1_ASM201222v1
ftp://ftp.ncbi.nlm.nih.gov/genomes/all/GCA/002/548/905/GCA_002548905.1_ASM254890v1								ftp://ftp.ncbi.nlm.nih.gov/genomes/all/GCF/002/012/245/GCF_002012245.1_ASM201224v1
ftp://ftp.ncbi.nlm.nih.gov/genomes/all/GCA/002/548/965/GCA_002548965.1_ASM254896v1								ftp://ftp.ncbi.nlm.nih.gov/genomes/all/GCF/002/012/265/GCF_002012265.1_ASM201226v1
ftp://ftp.ncbi.nlm.nih.gov/genomes/all/GCA/002/594/325/GCA_002594325.1_ASM259432v1								ftp://ftp.ncbi.nlm.nih.gov/genomes/all/GCF/002/012/305/GCF_002012305.1_ASM201230v1
ftp://ftp.ncbi.nlm.nih.gov/genomes/all/GCA/002/594/345/GCA_002594345.1_ASM259434v1								ftp://ftp.ncbi.nlm.nih.gov/genomes/all/GCF/002/024/865/GCF_002024865.1_ASM202486v1
ftp://ftp.ncbi.nlm.nih.gov/genomes/all/GCA/002/549/015/GCA_002549015.1_ASM254901v1								ftp://ftp.ncbi.nlm.nih.gov/genomes/all/GCF/002/055/605/GCF_002055605.1_ASM205560v1
ftp://ftp.ncbi.nlm.nih.gov/genomes/all/GCA/002/549/035/GCA_002549035.1_ASM254903v1								ftp://ftp.ncbi.nlm.nih.gov/genomes/all/GCF/002/055/635/GCF_002055635.1_ASM205563v1
ftp://ftp.ncbi.nlm.nih.gov/genomes/all/GCA/002/594/365/GCA_002594365.1_ASM259436v1								ftp://ftp.ncbi.nlm.nih.gov/genomes/all/GCF/002/056/065/GCF_002056065.1_ASM205606v1
ftp://ftp.ncbi.nlm.nih.gov/genomes/all/GCA/002/594/385/GCA_002594385.1_ASM259438v1								ftp://ftp.ncbi.nlm.nih.gov/genomes/all/GCF/002/056/145/GCF_002056145.1_ASM205614v1
ftp://ftp.ncbi.nlm.nih.gov/genomes/all/GCA/002/549/055/GCA_002549055.1_ASM254905v1								ftp://ftp.ncbi.nlm.nih.gov/genomes/all/GCF/002/056/635/GCF_002056635.1_ASM205663v1
ftp://ftp.ncbi.nlm.nih.gov/genomes/all/GCA/002/549/075/GCA_002549075.1_ASM254907v1								ftp://ftp.ncbi.nlm.nih.gov/genomes/all/GCF/002/057/245/GCF_002057245.1_ASM205724v1
ftp://ftp.ncbi.nlm.nih.gov/genomes/all/GCA/002/594/405/GCA_002594405.1_ASM259440v1								ftp://ftp.ncbi.nlm.nih.gov/genomes/all/GCF/002/057/355/GCF_002057355.1_ASM205735v1
ftp://ftp.ncbi.nlm.nih.gov/genomes/all/GCA/002/594/425/GCA_002594425.1_ASM259442v1								ftp://ftp.ncbi.nlm.nih.gov/genomes/all/GCF/002/058/765/GCF_002058765.1_ASM205876v1
ftp://ftp.ncbi.nlm.nih.gov/genomes/all/GCA/002/549/095/GCA_002549095.1_ASM254909v1								ftp://ftp.ncbi.nlm.nih.gov/genomes/all/GCF/002/078/275/GCF_002078275.1_ASM207827v1
ftp://ftp.ncbi.nlm.nih.gov/genomes/all/GCA/002/549/155/GCA_002549155.1_ASM254915v1								ftp://ftp.ncbi.nlm.nih.gov/genomes/all/GCF/002/078/295/GCF_002078295.1_ASM207829v1
ftp://ftp.ncbi.nlm.nih.gov/genomes/all/GCA/002/594/445/GCA_002594445.1_ASM259444v1								ftp://ftp.ncbi.nlm.nih.gov/genomes/all/GCF/002/079/225/GCF_002079225.1_ASM207922v1
ftp://ftp.ncbi.nlm.nih.gov/genomes/all/GCA/002/594/465/GCA_002594465.1_ASM259446v1								ftp://ftp.ncbi.nlm.nih.gov/genomes/all/GCF/002/090/355/GCF_002090355.1_ASM209035v1
ftp://ftp.ncbi.nlm.nih.gov/genomes/all/GCA/002/549/215/GCA_002549215.1_ASM254921v1								ftp://ftp.ncbi.nlm.nih.gov/genomes/all/GCF/002/105/735/GCF_002105735.1_ASM210573v1
ftp://ftp.ncbi.nlm.nih.gov/genomes/all/GCA/002/549/235/GCA_002549235.1_ASM254923v1								ftp://ftp.ncbi.nlm.nih.gov/genomes/all/GCF/002/116/715/GCF_002116715.1_ASM211671v1
ftp://ftp.ncbi.nlm.nih.gov/genomes/all/GCA/002/594/485/GCA_002594485.1_ASM259448v1								ftp://ftp.ncbi.nlm.nih.gov/genomes/all/GCF/002/118/095/GCF_002118095.1_ASM211809v1
ftp://ftp.ncbi.nlm.nih.gov/genomes/all/GCA/002/594/505/GCA_002594505.1_ASM259450v1								ftp://ftp.ncbi.nlm.nih.gov/genomes/all/GCF/002/142/675/GCF_002142675.1_ASM214267v1
ftp://ftp.ncbi.nlm.nih.gov/genomes/all/GCA/002/549/255/GCA_002549255.1_ASM254925v1								ftp://ftp.ncbi.nlm.nih.gov/genomes/all/GCF/002/142/695/GCF_002142695.1_ASM214269v1
ftp://ftp.ncbi.nlm.nih.gov/genomes/all/GCA/002/549/335/GCA_002549335.1_ASM254933v1								ftp://ftp.ncbi.nlm.nih.gov/genomes/all/GCF/002/142/715/GCF_002142715.1_ASM214271v1
ftp://ftp.ncbi.nlm.nih.gov/genomes/all/GCA/002/594/525/GCA_002594525.1_ASM259452v1								ftp://ftp.ncbi.nlm.nih.gov/genomes/all/GCF/002/156/825/GCF_002156825.1_ASM215682v1
ftp://ftp.ncbi.nlm.nih.gov/genomes/all/GCA/002/594/545/GCA_002594545.1_ASM259454v1								ftp://ftp.ncbi.nlm.nih.gov/genomes/all/GCF/002/156/845/GCF_002156845.1_ASM215684v1
ftp://ftp.ncbi.nlm.nih.gov/genomes/all/GCA/002/549/375/GCA_002549375.1_ASM254937v1								ftp://ftp.ncbi.nlm.nih.gov/genomes/all/GCF/002/157/245/GCF_002157245.1_ASM215724v1
ftp://ftp.ncbi.nlm.nih.gov/genomes/all/GCA/002/549/405/GCA_002549405.1_ASM254940v1								ftp://ftp.ncbi.nlm.nih.gov/genomes/all/GCF/002/163/655/GCF_002163655.1_ASM216365v1
ftp://ftp.ncbi.nlm.nih.gov/genomes/all/GCA/002/594/565/GCA_002594565.1_ASM259456v1								ftp://ftp.ncbi.nlm.nih.gov/genomes/all/GCF/002/163/695/GCF_002163695.1_ASM216369v1
ftp://ftp.ncbi.nlm.nih.gov/genomes/all/GCA/002/549/445/GCA_002549445.1_ASM254944v1								ftp://ftp.ncbi.nlm.nih.gov/genomes/all/GCF/002/163/935/GCF_002163935.1_ASM216393v1
ftp://ftp.ncbi.nlm.nih.gov/genomes/all/GCA/002/549/465/GCA_002549465.1_ASM254946v1								ftp://ftp.ncbi.nlm.nih.gov/genomes/all/GCF/002/163/955/GCF_002163955.1_ASM216395v1
ftp://ftp.ncbi.nlm.nih.gov/genomes/all/GCA/002/549/515/GCA_002549515.1_ASM254951v1								ftp://ftp.ncbi.nlm.nih.gov/genomes/all/GCF/002/180/055/GCF_002180055.1_ASM218005v1
ftp://ftp.ncbi.nlm.nih.gov/genomes/all/GCA/002/549/535/GCA_002549535.1_ASM254953v1								ftp://ftp.ncbi.nlm.nih.gov/genomes/all/GCF/002/180/095/GCF_002180095.1_ASM218009v1
ftp://ftp.ncbi.nlm.nih.gov/genomes/all/GCA/002/549/295/GCA_002549295.1_ASM254929v1								ftp://ftp.ncbi.nlm.nih.gov/genomes/all/GCF/002/180/135/GCF_002180135.1_ASM218013v1
ftp://ftp.ncbi.nlm.nih.gov/genomes/all/GCA/002/633/585/GCA_002633585.1_ASM263358v1								ftp://ftp.ncbi.nlm.nih.gov/genomes/all/GCF/002/180/195/GCF_002180195.1_ASM218019v1
ftp://ftp.ncbi.nlm.nih.gov/genomes/all/GCA/000/973/455/GCA_000973455.1_ViralProj281401								ftp://ftp.ncbi.nlm.nih.gov/genomes/all/GCF/002/180/215/GCF_002180215.1_ASM218021v1
ftp://ftp.ncbi.nlm.nih.gov/genomes/all/GCA/001/041/555/GCA_001041555.1_ViralProj287998								ftp://ftp.ncbi.nlm.nih.gov/genomes/all/GCF/002/180/275/GCF_002180275.1_ASM218027v1
ftp://ftp.ncbi.nlm.nih.gov/genomes/all/GCA/001/041/155/GCA_001041155.1_ViralProj287993								ftp://ftp.ncbi.nlm.nih.gov/genomes/all/GCF/002/192/275/GCF_002192275.1_ASM219227v1
ftp://ftp.ncbi.nlm.nih.gov/genomes/all/GCA/001/502/075/GCA_001502075.1_ViralProj307760								ftp://ftp.ncbi.nlm.nih.gov/genomes/all/GCF/002/192/295/GCF_002192295.1_ASM219229v1
ftp://ftp.ncbi.nlm.nih.gov/genomes/all/GCA/001/551/065/GCA_001551065.1_ViralProj310935								ftp://ftp.ncbi.nlm.nih.gov/genomes/all/GCF/002/193/095/GCF_002193095.1_ASM219309v1
ftp://ftp.ncbi.nlm.nih.gov/genomes/all/GCA/001/550/685/GCA_001550685.1_ViralProj310934								ftp://ftp.ncbi.nlm.nih.gov/genomes/all/GCF/002/196/475/GCF_002196475.1_ASM219647v1
ftp://ftp.ncbi.nlm.nih.gov/genomes/all/GCA/001/736/655/GCA_001736655.1_ViralProj343533								ftp://ftp.ncbi.nlm.nih.gov/genomes/all/GCF/002/196/495/GCF_002196495.1_ASM219649v1
ftp://ftp.ncbi.nlm.nih.gov/genomes/all/GCA/002/149/365/GCA_002149365.1_ViralProj266637.10								ftp://ftp.ncbi.nlm.nih.gov/genomes/all/GCF/002/201/835/GCF_002201835.1_ASM220183v1
ftp://ftp.ncbi.nlm.nih.gov/genomes/all/GCA/002/829/345/GCA_002829345.1_ASM282934v1								ftp://ftp.ncbi.nlm.nih.gov/genomes/all/GCF/002/202/175/GCF_002202175.1_ASM220217v1
ftp://ftp.ncbi.nlm.nih.gov/genomes/all/GCA/002/597/685/GCA_002597685.1_ASM259768v1								ftp://ftp.ncbi.nlm.nih.gov/genomes/all/GCF/002/208/865/GCF_002208865.1_ASM220886v1
ftp://ftp.ncbi.nlm.nih.gov/genomes/all/GCA/002/597/705/GCA_002597705.1_ASM259770v1								ftp://ftp.ncbi.nlm.nih.gov/genomes/all/GCF/002/209/105/GCF_002209105.1_ASM220910v1
ftp://ftp.ncbi.nlm.nih.gov/genomes/all/GCA/001/502/015/GCA_001502015.1_ViralProj307748								ftp://ftp.ncbi.nlm.nih.gov/genomes/all/GCF/002/211/725/GCF_002211725.1_ASM221172v1
ftp://ftp.ncbi.nlm.nih.gov/genomes/all/GCA/001/502/055/GCA_001502055.1_ViralProj307756								ftp://ftp.ncbi.nlm.nih.gov/genomes/all/GCF/002/214/205/GCF_002214205.1_ASM221420v1
ftp://ftp.ncbi.nlm.nih.gov/genomes/all/GCA/001/503/015/GCA_001503015.1_ViralProj307825								ftp://ftp.ncbi.nlm.nih.gov/genomes/all/GCF/002/214/745/GCF_002214745.2_ASM221474v2
ftp://ftp.ncbi.nlm.nih.gov/genomes/all/GCA/001/504/615/GCA_001504615.1_ViralProj307824								ftp://ftp.ncbi.nlm.nih.gov/genomes/all/GCF/002/215/095/GCF_002215095.1_ASM221509v1
ftp://ftp.ncbi.nlm.nih.gov/genomes/all/GCA/001/551/385/GCA_001551385.1_ViralProj310933								ftp://ftp.ncbi.nlm.nih.gov/genomes/all/GCF/002/220/215/GCF_002220215.1_ASM222021v1
ftp://ftp.ncbi.nlm.nih.gov/genomes/all/GCA/000/989/095/GCA_000989095.1_ViralProj282773								ftp://ftp.ncbi.nlm.nih.gov/genomes/all/GCF/002/220/265/GCF_002220265.1_ASM222026v1
ftp://ftp.ncbi.nlm.nih.gov/genomes/all/GCA/001/038/615/GCA_001038615.1_ViralProj287578								ftp://ftp.ncbi.nlm.nih.gov/genomes/all/GCF/002/237/305/GCF_002237305.1_ASM223730v1
ftp://ftp.ncbi.nlm.nih.gov/genomes/all/GCA/001/040/755/GCA_001040755.1_ViralProj287584								ftp://ftp.ncbi.nlm.nih.gov/genomes/all/GCF/002/237/325/GCF_002237325.1_ASM223732v1
ftp://ftp.ncbi.nlm.nih.gov/genomes/all/GCA/001/041/215/GCA_001041215.1_ViralProj288005								ftp://ftp.ncbi.nlm.nih.gov/genomes/all/GCF/002/249/955/GCF_002249955.1_ASM224995v1
ftp://ftp.ncbi.nlm.nih.gov/genomes/all/GCA/001/041/235/GCA_001041235.1_ViralProj288009								ftp://ftp.ncbi.nlm.nih.gov/genomes/all/GCF/002/269/325/GCF_002269325.1_ASM226932v1
ftp://ftp.ncbi.nlm.nih.gov/genomes/all/GCA/001/041/275/GCA_001041275.1_ViralProj288017								ftp://ftp.ncbi.nlm.nih.gov/genomes/all/GCF/002/278/115/GCF_002278115.2_ASM227811v2
ftp://ftp.ncbi.nlm.nih.gov/genomes/all/GCA/001/041/295/GCA_001041295.1_ViralProj288021								ftp://ftp.ncbi.nlm.nih.gov/genomes/all/GCF/002/285/755/GCF_002285755.1_ASM228575v1
ftp://ftp.ncbi.nlm.nih.gov/genomes/all/GCA/001/041/315/GCA_001041315.1_ViralProj288025								ftp://ftp.ncbi.nlm.nih.gov/genomes/all/GCF/002/302/315/GCF_002302315.1_ASM230231v1
ftp://ftp.ncbi.nlm.nih.gov/genomes/all/GCA/001/041/575/GCA_001041575.1_ViralProj288002								ftp://ftp.ncbi.nlm.nih.gov/genomes/all/GCF/002/302/335/GCF_002302335.1_ASM230233v1
ftp://ftp.ncbi.nlm.nih.gov/genomes/all/GCA/001/041/615/GCA_001041615.1_ViralProj288010								ftp://ftp.ncbi.nlm.nih.gov/genomes/all/GCF/002/310/555/GCF_002310555.1_ASM231055v1
ftp://ftp.ncbi.nlm.nih.gov/genomes/all/GCA/001/041/635/GCA_001041635.1_ViralProj288014								ftp://ftp.ncbi.nlm.nih.gov/genomes/all/GCF/002/310/575/GCF_002310575.1_ASM231057v1
ftp://ftp.ncbi.nlm.nih.gov/genomes/all/GCA/001/041/655/GCA_001041655.1_ViralProj288018								ftp://ftp.ncbi.nlm.nih.gov/genomes/all/GCF/002/310/595/GCF_002310595.1_ASM231059v1
ftp://ftp.ncbi.nlm.nih.gov/genomes/all/GCA/001/041/675/GCA_001041675.1_ViralProj288022								ftp://ftp.ncbi.nlm.nih.gov/genomes/all/GCF/002/310/615/GCF_002310615.1_ASM231061v1
ftp://ftp.ncbi.nlm.nih.gov/genomes/all/GCA/001/041/955/GCA_001041955.1_ViralProj288007								ftp://ftp.ncbi.nlm.nih.gov/genomes/all/GCF/002/310/635/GCF_002310635.1_ASM231063v1
ftp://ftp.ncbi.nlm.nih.gov/genomes/all/GCA/001/041/995/GCA_001041995.1_ViralProj288015								ftp://ftp.ncbi.nlm.nih.gov/genomes/all/GCF/002/310/655/GCF_002310655.1_ASM231065v1
ftp://ftp.ncbi.nlm.nih.gov/genomes/all/GCA/001/042/035/GCA_001042035.1_ViralProj288023								ftp://ftp.ncbi.nlm.nih.gov/genomes/all/GCF/002/310/675/GCF_002310675.1_ASM231067v1
ftp://ftp.ncbi.nlm.nih.gov/genomes/all/GCA/001/042/295/GCA_001042295.1_ViralProj288004								ftp://ftp.ncbi.nlm.nih.gov/genomes/all/GCF/002/310/695/GCF_002310695.1_ASM231069v1
ftp://ftp.ncbi.nlm.nih.gov/genomes/all/GCA/001/042/335/GCA_001042335.1_ViralProj288012								ftp://ftp.ncbi.nlm.nih.gov/genomes/all/GCF/002/310/715/GCF_002310715.1_ASM231071v1
ftp://ftp.ncbi.nlm.nih.gov/genomes/all/GCA/001/042/355/GCA_001042355.1_ViralProj288016								ftp://ftp.ncbi.nlm.nih.gov/genomes/all/GCF/002/310/735/GCF_002310735.1_ASM231073v1
ftp://ftp.ncbi.nlm.nih.gov/genomes/all/GCA/001/042/395/GCA_001042395.1_ViralProj288024								ftp://ftp.ncbi.nlm.nih.gov/genomes/all/GCF/002/357/875/GCF_002357875.1_ASM235787v1
ftp://ftp.ncbi.nlm.nih.gov/genomes/all/GCA/002/602/945/GCA_002602945.1_ASM260294v1								ftp://ftp.ncbi.nlm.nih.gov/genomes/all/GCF/002/357/895/GCF_002357895.1_ASM235789v1
ftp://ftp.ncbi.nlm.nih.gov/genomes/all/GCA/002/605/705/GCA_002605705.1_ASM260570v1								ftp://ftp.ncbi.nlm.nih.gov/genomes/all/GCF/002/357/915/GCF_002357915.1_ASM235791v1
ftp://ftp.ncbi.nlm.nih.gov/genomes/all/GCA/002/605/885/GCA_002605885.1_ASM260588v1								ftp://ftp.ncbi.nlm.nih.gov/genomes/all/GCF/002/393/365/GCF_002393365.1_ASM239336v1
ftp://ftp.ncbi.nlm.nih.gov/genomes/all/GCA/002/605/905/GCA_002605905.1_ASM260590v1								ftp://ftp.ncbi.nlm.nih.gov/genomes/all/GCF/002/393/465/GCF_002393465.1_ASM239346v1
ftp://ftp.ncbi.nlm.nih.gov/genomes/all/GCA/002/623/065/GCA_002623065.1_ASM262306v1								ftp://ftp.ncbi.nlm.nih.gov/genomes/all/GCF/002/587/005/GCF_002587005.1_ASM258700v1
ftp://ftp.ncbi.nlm.nih.gov/genomes/all/GCA/002/623/085/GCA_002623085.1_ASM262308v1								ftp://ftp.ncbi.nlm.nih.gov/genomes/all/GCF/002/589/795/GCF_002589795.1_ASM258979v1
ftp://ftp.ncbi.nlm.nih.gov/genomes/all/GCA/002/623/105/GCA_002623105.1_ASM262310v1								ftp://ftp.ncbi.nlm.nih.gov/genomes/all/GCF/002/591/135/GCF_002591135.1_ASM259113v1
ftp://ftp.ncbi.nlm.nih.gov/genomes/all/GCA/002/623/125/GCA_002623125.1_ASM262312v1								ftp://ftp.ncbi.nlm.nih.gov/genomes/all/GCF/002/716/885/GCF_002716885.1_ASM271688v1
ftp://ftp.ncbi.nlm.nih.gov/genomes/all/GCA/002/623/145/GCA_002623145.1_ASM262314v1								ftp://ftp.ncbi.nlm.nih.gov/genomes/all/GCF/002/741/175/GCF_002741175.1_ASM274117v1
ftp://ftp.ncbi.nlm.nih.gov/genomes/all/GCA/002/623/165/GCA_002623165.1_ASM262316v1								ftp://ftp.ncbi.nlm.nih.gov/genomes/all/GCF/002/741/195/GCF_002741195.1_ASM274119v1
ftp://ftp.ncbi.nlm.nih.gov/genomes/all/GCA/002/623/185/GCA_002623185.1_ASM262318v1								ftp://ftp.ncbi.nlm.nih.gov/genomes/all/GCF/002/741/215/GCF_002741215.1_ASM274121v1
ftp://ftp.ncbi.nlm.nih.gov/genomes/all/GCA/002/623/205/GCA_002623205.1_ASM262320v1								ftp://ftp.ncbi.nlm.nih.gov/genomes/all/GCF/002/741/255/GCF_002741255.1_ASM274125v1
ftp://ftp.ncbi.nlm.nih.gov/genomes/all/GCA/002/623/225/GCA_002623225.1_ASM262322v1								ftp://ftp.ncbi.nlm.nih.gov/genomes/all/GCF/002/741/295/GCF_002741295.1_ASM274129v1
ftp://ftp.ncbi.nlm.nih.gov/genomes/all/GCA/002/756/235/GCA_002756235.1_ASM275623v1								ftp://ftp.ncbi.nlm.nih.gov/genomes/all/GCF/002/741/315/GCF_002741315.1_ASM274131v1
ftp://ftp.ncbi.nlm.nih.gov/genomes/all/GCA/002/756/255/GCA_002756255.1_ASM275625v1								ftp://ftp.ncbi.nlm.nih.gov/genomes/all/GCF/002/741/335/GCF_002741335.1_ASM274133v1
ftp://ftp.ncbi.nlm.nih.gov/genomes/all/GCA/002/756/275/GCA_002756275.1_ASM275627v1								ftp://ftp.ncbi.nlm.nih.gov/genomes/all/GCF/002/741/355/GCF_002741355.1_ASM274135v1
ftp://ftp.ncbi.nlm.nih.gov/genomes/all/GCA/002/756/295/GCA_002756295.1_ASM275629v1								ftp://ftp.ncbi.nlm.nih.gov/genomes/all/GCF/002/741/435/GCF_002741435.1_ASM274143v1
ftp://ftp.ncbi.nlm.nih.gov/genomes/all/GCA/000/982/285/GCA_000982285.1_ViralProj282403								ftp://ftp.ncbi.nlm.nih.gov/genomes/all/GCF/002/741/455/GCF_002741455.1_ASM274145v1
ftp://ftp.ncbi.nlm.nih.gov/genomes/all/GCA/000/989/015/GCA_000989015.1_ViralProj282770								ftp://ftp.ncbi.nlm.nih.gov/genomes/all/GCF/002/741/475/GCF_002741475.1_ASM274147v1
ftp://ftp.ncbi.nlm.nih.gov/genomes/all/GCA/002/676/115/GCA_002676115.1_ASM267611v1								ftp://ftp.ncbi.nlm.nih.gov/genomes/all/GCF/002/741/495/GCF_002741495.1_ASM274149v1
ftp://ftp.ncbi.nlm.nih.gov/genomes/all/GCA/002/676/135/GCA_002676135.1_ASM267613v1								ftp://ftp.ncbi.nlm.nih.gov/genomes/all/GCF/002/741/535/GCF_002741535.1_ASM274153v1
ftp://ftp.ncbi.nlm.nih.gov/genomes/all/GCA/002/676/215/GCA_002676215.1_ASM267621v1								ftp://ftp.ncbi.nlm.nih.gov/genomes/all/GCF/002/741/555/GCF_002741555.1_ASM274155v1
ftp://ftp.ncbi.nlm.nih.gov/genomes/all/GCA/002/676/255/GCA_002676255.1_ASM267625v1								ftp://ftp.ncbi.nlm.nih.gov/genomes/all/GCF/002/741/575/GCF_002741575.1_ASM274157v1
ftp://ftp.ncbi.nlm.nih.gov/genomes/all/GCA/002/676/315/GCA_002676315.1_ASM267631v1								ftp://ftp.ncbi.nlm.nih.gov/genomes/all/GCF/002/741/595/GCF_002741595.1_ASM274159v1
ftp://ftp.ncbi.nlm.nih.gov/genomes/all/GCA/002/676/535/GCA_002676535.1_ASM267653v1								ftp://ftp.ncbi.nlm.nih.gov/genomes/all/GCF/002/761/835/GCF_002761835.1_ASM276183v1
ftp://ftp.ncbi.nlm.nih.gov/genomes/all/GCA/001/028/985/GCA_001028985.1_ViralProj286937								ftp://ftp.ncbi.nlm.nih.gov/genomes/all/GCF/002/763/995/GCF_002763995.1_ASM276399v1
ftp://ftp.ncbi.nlm.nih.gov/genomes/all/GCA/002/659/875/GCA_002659875.1_ASM265987v1								ftp://ftp.ncbi.nlm.nih.gov/genomes/all/GCF/002/764/015/GCF_002764015.1_ASM276401v1
ftp://ftp.ncbi.nlm.nih.gov/genomes/all/GCA/002/659/895/GCA_002659895.1_ASM265989v1								ftp://ftp.ncbi.nlm.nih.gov/genomes/all/GCF/002/786/655/GCF_002786655.1_ASM278665v1
ftp://ftp.ncbi.nlm.nih.gov/genomes/all/GCA/002/681/175/GCA_002681175.1_ASM268117v1								ftp://ftp.ncbi.nlm.nih.gov/genomes/all/GCF/002/787/215/GCF_002787215.1_ASM278721v1
ftp://ftp.ncbi.nlm.nih.gov/genomes/all/GCA/002/681/535/GCA_002681535.1_ASM268153v1								ftp://ftp.ncbi.nlm.nih.gov/genomes/all/GCF/002/787/315/GCF_002787315.1_ASM278731v1
ftp://ftp.ncbi.nlm.nih.gov/genomes/all/GCA/002/681/575/GCA_002681575.1_ASM268157v1								ftp://ftp.ncbi.nlm.nih.gov/genomes/all/GCF/002/787/545/GCF_002787545.1_ASM278754v1
ftp://ftp.ncbi.nlm.nih.gov/genomes/all/GCA/002/659/815/GCA_002659815.1_ASM265981v1								ftp://ftp.ncbi.nlm.nih.gov/genomes/all/GCF/002/787/645/GCF_002787645.1_ASM278764v1
ftp://ftp.ncbi.nlm.nih.gov/genomes/all/GCA/001/040/975/GCA_001040975.1_ViralProj287953								ftp://ftp.ncbi.nlm.nih.gov/genomes/all/GCF/002/787/935/GCF_002787935.1_ASM278793v1
ftp://ftp.ncbi.nlm.nih.gov/genomes/all/GCA/001/470/155/GCA_001470155.1_ViralProj306298								ftp://ftp.ncbi.nlm.nih.gov/genomes/all/GCF/002/788/115/GCF_002788115.1_ASM278811v1
ftp://ftp.ncbi.nlm.nih.gov/genomes/all/GCA/002/604/765/GCA_002604765.1_ASM260476v1								ftp://ftp.ncbi.nlm.nih.gov/genomes/all/GCF/002/788/295/GCF_002788295.1_ASM278829v1
ftp://ftp.ncbi.nlm.nih.gov/genomes/all/GCA/002/604/785/GCA_002604785.1_ASM260478v1								ftp://ftp.ncbi.nlm.nih.gov/genomes/all/GCF/002/796/445/GCF_002796445.1_ASM279644v1
ftp://ftp.ncbi.nlm.nih.gov/genomes/all/GCA/002/604/805/GCA_002604805.1_ASM260480v1								ftp://ftp.ncbi.nlm.nih.gov/genomes/all/GCF/002/796/585/GCF_002796585.1_ASM279658v1
ftp://ftp.ncbi.nlm.nih.gov/genomes/all/GCA/002/604/825/GCA_002604825.1_ASM260482v1								ftp://ftp.ncbi.nlm.nih.gov/genomes/all/GCF/002/803/805/GCF_002803805.1_ASM280380v2
ftp://ftp.ncbi.nlm.nih.gov/genomes/all/GCA/002/604/845/GCA_002604845.1_ASM260484v1								ftp://ftp.ncbi.nlm.nih.gov/genomes/all/GCF/002/803/905/GCF_002803905.1_ASM280390v1
ftp://ftp.ncbi.nlm.nih.gov/genomes/all/GCA/002/604/865/GCA_002604865.1_ASM260486v1								ftp://ftp.ncbi.nlm.nih.gov/genomes/all/GCF/002/804/345/GCF_002804345.1_ASM280434v1
ftp://ftp.ncbi.nlm.nih.gov/genomes/all/GCA/002/624/465/GCA_002624465.1_ASM262446v1								ftp://ftp.ncbi.nlm.nih.gov/genomes/all/GCF/002/812/545/GCF_002812545.1_ASM281254v1
ftp://ftp.ncbi.nlm.nih.gov/genomes/all/GCA/001/504/335/GCA_001504335.1_ViralProj307934								ftp://ftp.ncbi.nlm.nih.gov/genomes/all/GCF/002/812/685/GCF_002812685.1_ASM281268v1
ftp://ftp.ncbi.nlm.nih.gov/genomes/all/GCA/001/041/455/GCA_001041455.1_ViralProj287978								ftp://ftp.ncbi.nlm.nih.gov/genomes/all/GCF/002/843/685/GCF_002843685.1_ASM284368v1
ftp://ftp.ncbi.nlm.nih.gov/genomes/all/GCA/001/041/815/GCA_001041815.1_ViralProj287979								ftp://ftp.ncbi.nlm.nih.gov/genomes/all/GCF/002/844/165/GCF_002844165.1_ASM284416v1
ftp://ftp.ncbi.nlm.nih.gov/genomes/all/GCA/001/042/175/GCA_001042175.1_ViralProj287980								ftp://ftp.ncbi.nlm.nih.gov/genomes/all/GCF/002/844/685/GCF_002844685.1_ASM284468v1
ftp://ftp.ncbi.nlm.nih.gov/genomes/all/GCA/001/974/015/GCA_001974015.1_ViralMultiSegProj368924								ftp://ftp.ncbi.nlm.nih.gov/genomes/all/GCF/002/846/135/GCF_002846135.1_ASM284613v1
ftp://ftp.ncbi.nlm.nih.gov/genomes/all/GCA/001/440/955/GCA_001440955.1_ViralProj301254								ftp://ftp.ncbi.nlm.nih.gov/genomes/all/GCF/002/848/225/GCF_002848225.1_ASM284822v1
ftp://ftp.ncbi.nlm.nih.gov/genomes/all/GCA/002/827/085/GCA_002827085.1_ASM282708v1								ftp://ftp.ncbi.nlm.nih.gov/genomes/all/GCF/002/850/675/GCF_002850675.2_ASM285067v2
ftp://ftp.ncbi.nlm.nih.gov/genomes/all/GCA/001/482/955/GCA_001482955.1_ViralProj306892								ftp://ftp.ncbi.nlm.nih.gov/genomes/all/GCF/002/853/655/GCF_002853655.1_ASM285365v1
ftp://ftp.ncbi.nlm.nih.gov/genomes/all/GCA/001/500/555/GCA_001500555.1_ViralProj307742								ftp://ftp.ncbi.nlm.nih.gov/genomes/all/GCF/002/853/715/GCF_002853715.1_ASM285371v1
ftp://ftp.ncbi.nlm.nih.gov/genomes/all/GCA/001/500/575/GCA_001500575.1_ViralProj307746								ftp://ftp.ncbi.nlm.nih.gov/genomes/all/GCF/002/853/805/GCF_002853805.1_ASM285380v1
ftp://ftp.ncbi.nlm.nih.gov/genomes/all/GCA/001/500/955/GCA_001500955.1_ViralProj307822								ftp://ftp.ncbi.nlm.nih.gov/genomes/all/GCF/002/854/065/GCF_002854065.1_ASM285406v1
ftp://ftp.ncbi.nlm.nih.gov/genomes/all/GCA/001/500/995/GCA_001500995.1_ViralProj307055								ftp://ftp.ncbi.nlm.nih.gov/genomes/all/GCF/002/855/325/GCF_002855325.1_ASM285532v1
ftp://ftp.ncbi.nlm.nih.gov/genomes/all/GCA/001/501/175/GCA_001501175.1_ViralProj307735								ftp://ftp.ncbi.nlm.nih.gov/genomes/all/GCF/002/855/415/GCF_002855415.1_ASM285541v1
ftp://ftp.ncbi.nlm.nih.gov/genomes/all/GCA/001/501/215/GCA_001501215.1_ViralProj307743								ftp://ftp.ncbi.nlm.nih.gov/genomes/all/GCF/002/859/105/GCF_002859105.1_ASM285910v1
ftp://ftp.ncbi.nlm.nih.gov/genomes/all/GCA/001/501/235/GCA_001501235.1_ViralProj307747								ftp://ftp.ncbi.nlm.nih.gov/genomes/all/GCF/002/860/085/GCF_002860085.1_ASM286008v1
ftp://ftp.ncbi.nlm.nih.gov/genomes/all/GCA/001/501/595/GCA_001501595.1_ViralProj307819								ftp://ftp.ncbi.nlm.nih.gov/genomes/all/GCF/002/860/105/GCF_002860105.1_ASM286010v1
ftp://ftp.ncbi.nlm.nih.gov/genomes/all/GCA/001/501/975/GCA_001501975.1_ViralProj307740								ftp://ftp.ncbi.nlm.nih.gov/genomes/all/GCF/002/863/665/GCF_002863665.1_ASM286366v1
ftp://ftp.ncbi.nlm.nih.gov/genomes/all/GCA/001/501/995/GCA_001501995.1_ViralProj307744								ftp://ftp.ncbi.nlm.nih.gov/genomes/all/GCF/002/863/685/GCF_002863685.1_ASM286368v1
ftp://ftp.ncbi.nlm.nih.gov/genomes/all/GCA/001/502/375/GCA_001502375.1_ViralProj307820								ftp://ftp.ncbi.nlm.nih.gov/genomes/all/GCF/002/863/845/GCF_002863845.1_ASM286384v1
ftp://ftp.ncbi.nlm.nih.gov/genomes/all/GCA/001/502/595/GCA_001502595.1_ViralProj307741								ftp://ftp.ncbi.nlm.nih.gov/genomes/all/GCF/002/863/885/GCF_002863885.1_ASM286388v1
ftp://ftp.ncbi.nlm.nih.gov/genomes/all/GCA/001/502/615/GCA_001502615.1_ViralProj307745								ftp://ftp.ncbi.nlm.nih.gov/genomes/all/GCF/002/870/165/GCF_002870165.1_ASM287016v1
ftp://ftp.ncbi.nlm.nih.gov/genomes/all/GCA/001/502/995/GCA_001502995.1_ViralProj307821								ftp://ftp.ncbi.nlm.nih.gov/genomes/all/GCF/002/879/975/GCF_002879975.1_ASM287997v1
ftp://ftp.ncbi.nlm.nih.gov/genomes/all/GCA/001/551/045/GCA_001551045.1_ViralProj310931								ftp://ftp.ncbi.nlm.nih.gov/genomes/all/GCF/002/887/715/GCF_002887715.1_ASM288771v1
ftp://ftp.ncbi.nlm.nih.gov/genomes/all/GCA/002/605/785/GCA_002605785.1_ASM260578v1								ftp://ftp.ncbi.nlm.nih.gov/genomes/all/GCF/002/893/905/GCF_002893905.2_ASM289390v2
ftp://ftp.ncbi.nlm.nih.gov/genomes/all/GCA/002/605/805/GCA_002605805.1_ASM260580v1								ftp://ftp.ncbi.nlm.nih.gov/genomes/all/GCF/002/899/475/GCF_002899475.1_ASM289947v1
ftp://ftp.ncbi.nlm.nih.gov/genomes/all/GCA/002/605/865/GCA_002605865.1_ASM260586v1								ftp://ftp.ncbi.nlm.nih.gov/genomes/all/GCF/002/899/495/GCF_002899495.1_ASM289949v1
ftp://ftp.ncbi.nlm.nih.gov/genomes/all/GCA/002/622/405/GCA_002622405.1_ASM262240v1								ftp://ftp.ncbi.nlm.nih.gov/genomes/all/GCF/002/899/515/GCF_002899515.1_ASM289951v1
ftp://ftp.ncbi.nlm.nih.gov/genomes/all/GCA/002/597/225/GCA_002597225.1_ASM259722v1								ftp://ftp.ncbi.nlm.nih.gov/genomes/all/GCF/002/899/535/GCF_002899535.1_ASM289953v1
ftp://ftp.ncbi.nlm.nih.gov/genomes/all/GCA/002/827/045/GCA_002827045.1_ASM282704v1								ftp://ftp.ncbi.nlm.nih.gov/genomes/all/GCF/002/900/305/GCF_002900305.1_ASM290030v1
ftp://ftp.ncbi.nlm.nih.gov/genomes/all/GCA/001/008/535/GCA_001008535.1_ViralProj284015								ftp://ftp.ncbi.nlm.nih.gov/genomes/all/GCF/002/903/105/GCF_002903105.1_ASM290310v1
ftp://ftp.ncbi.nlm.nih.gov/genomes/all/GCA/001/470/995/GCA_001470995.1_ViralProj306347								ftp://ftp.ncbi.nlm.nih.gov/genomes/all/GCF/002/903/125/GCF_002903125.1_ASM290312v1
ftp://ftp.ncbi.nlm.nih.gov/genomes/all/GCA/001/500/535/GCA_001500535.1_ViralProj307738								ftp://ftp.ncbi.nlm.nih.gov/genomes/all/GCF/900/092/615/GCF_900092615.1_PRJEB14041
ftp://ftp.ncbi.nlm.nih.gov/genomes/all/GCA/001/502/575/GCA_001502575.1_ViralProj307737								ftp://ftp.ncbi.nlm.nih.gov/genomes/all/GCF/900/096/795/GCF_900096795.1_Ecoli_AG100_Sample3_Doxycycline_Assembly
ftp://ftp.ncbi.nlm.nih.gov/genomes/all/GCA/002/605/825/GCA_002605825.1_ASM260582v1								ftp://ftp.ncbi.nlm.nih.gov/genomes/all/GCF/900/096/845/GCF_900096845.1_Ecoli_AG100_Sample3_M9_Assembly
ftp://ftp.ncbi.nlm.nih.gov/genomes/all/GCA/002/598/585/GCA_002598585.1_ASM259858v1								ftp://ftp.ncbi.nlm.nih.gov/genomes/all/GCF/900/149/875/GCF_900149875.1_EPEC1
ftp://ftp.ncbi.nlm.nih.gov/genomes/all/GCA/002/668/895/GCA_002668895.1_ASM266889v1								ftp://ftp.ncbi.nlm.nih.gov/genomes/all/GCF/900/174/625/GCF_900174625.1_WI1-reUpload
ftp://ftp.ncbi.nlm.nih.gov/genomes/all/GCA/002/669/115/GCA_002669115.1_ASM266911v1								ftp://ftp.ncbi.nlm.nih.gov/genomes/all/GCF/900/184/875/GCF_900184875.1_Unitig
ftp://ftp.ncbi.nlm.nih.gov/genomes/all/GCA/002/669/335/GCA_002669335.1_ASM266933v1								ftp://ftp.ncbi.nlm.nih.gov/genomes/all/GCF/900/186/905/GCF_900186905.1_49923_G01
ftp://ftp.ncbi.nlm.nih.gov/genomes/all/GCA/001/019/975/GCA_001019975.1_ViralMultiSegProj285598								ftp://ftp.ncbi.nlm.nih.gov/genomes/all/GCF/000/597/785/GCF_000597785.2_ASM59778v2
ftp://ftp.ncbi.nlm.nih.gov/genomes/all/GCA/002/641/915/GCA_002641915.1_ASM264191v1								ftp://ftp.ncbi.nlm.nih.gov/genomes/all/GCF/001/636/255/GCF_001636255.1_ASM163625v1
ftp://ftp.ncbi.nlm.nih.gov/genomes/all/GCA/001/500/495/GCA_001500495.1_ViralProj307730								ftp://ftp.ncbi.nlm.nih.gov/genomes/all/GCF/000/714/655/GCF_000714655.1_ASM71465v1
ftp://ftp.ncbi.nlm.nih.gov/genomes/all/GCA/001/500/935/GCA_001500935.1_ViralProj307818								ftp://ftp.ncbi.nlm.nih.gov/genomes/all/GCF/001/022/115/GCF_001022115.1_ASM102211v1
ftp://ftp.ncbi.nlm.nih.gov/genomes/all/GCA/001/501/155/GCA_001501155.1_ViralProj307731								ftp://ftp.ncbi.nlm.nih.gov/genomes/all/GCF/001/022/195/GCF_001022195.1_ASM102219v1
ftp://ftp.ncbi.nlm.nih.gov/genomes/all/GCA/002/636/175/GCA_002636175.1_ASM263617v1								ftp://ftp.ncbi.nlm.nih.gov/genomes/all/GCF/001/022/295/GCF_001022295.1_ASM102229v1
ftp://ftp.ncbi.nlm.nih.gov/genomes/all/GCA/002/660/415/GCA_002660415.1_ASM266041v1								ftp://ftp.ncbi.nlm.nih.gov/genomes/all/GCF/001/548/355/GCF_001548355.1_ASM154835v1
ftp://ftp.ncbi.nlm.nih.gov/genomes/all/GCA/001/500/615/GCA_001500615.1_ViralProj307754								ftp://ftp.ncbi.nlm.nih.gov/genomes/all/GCF/001/870/185/GCF_001870185.1_ASM187018v1
ftp://ftp.ncbi.nlm.nih.gov/genomes/all/GCA/001/501/275/GCA_001501275.1_ViralProj307755								ftp://ftp.ncbi.nlm.nih.gov/genomes/all/GCF/001/970/835/GCF_001970835.1_ASM197083v1
ftp://ftp.ncbi.nlm.nih.gov/genomes/all/GCA/002/646/735/GCA_002646735.1_ASM264673v1								ftp://ftp.ncbi.nlm.nih.gov/genomes/all/GCF/002/072/655/GCF_002072655.1_ASM207265v1
ftp://ftp.ncbi.nlm.nih.gov/genomes/all/GCA/001/028/965/GCA_001028965.1_ViralProj286258								ftp://ftp.ncbi.nlm.nih.gov/genomes/all/GCF/002/906/395/GCF_002906395.1_ASM290639v1
ftp://ftp.ncbi.nlm.nih.gov/genomes/all/GCA/001/504/575/GCA_001504575.1_ViralProj308016								ftp://ftp.ncbi.nlm.nih.gov/genomes/all/GCF/002/906/415/GCF_002906415.1_ASM290641v1
ftp://ftp.ncbi.nlm.nih.gov/genomes/all/GCA/001/029/045/GCA_001029045.1_ViralProj287042								ftp://ftp.ncbi.nlm.nih.gov/genomes/all/GCF/002/906/435/GCF_002906435.1_ASM290643v1
ftp://ftp.ncbi.nlm.nih.gov/genomes/all/GCA/001/030/085/GCA_001030085.1_ViralMultiSegProj286970								ftp://ftp.ncbi.nlm.nih.gov/genomes/all/GCF/000/281/435/GCF_000281435.2_ASM28143v2
ftp://ftp.ncbi.nlm.nih.gov/genomes/all/GCA/002/672/635/GCA_002672635.1_ASM267263v1								ftp://ftp.ncbi.nlm.nih.gov/genomes/all/GCF/000/281/535/GCF_000281535.2_ASM28153v2
ftp://ftp.ncbi.nlm.nih.gov/genomes/all/GCA/002/672/655/GCA_002672655.1_ASM267265v1								ftp://ftp.ncbi.nlm.nih.gov/genomes/all/GCF/000/364/385/GCF_000364385.3_ASM36438v3
ftp://ftp.ncbi.nlm.nih.gov/genomes/all/GCA/002/672/695/GCA_002672695.1_ASM267269v1								ftp://ftp.ncbi.nlm.nih.gov/genomes/all/GCF/000/406/765/GCF_000406765.2_ASM40676v2
ftp://ftp.ncbi.nlm.nih.gov/genomes/all/GCA/002/672/715/GCA_002672715.1_ASM267271v1								ftp://ftp.ncbi.nlm.nih.gov/genomes/all/GCF/000/417/085/GCF_000417085.2_ASM41708v2
ftp://ftp.ncbi.nlm.nih.gov/genomes/all/GCA/002/672/735/GCA_002672735.1_ASM267273v1								ftp://ftp.ncbi.nlm.nih.gov/genomes/all/GCF/000/417/225/GCF_000417225.2_ASM41722v2
ftp://ftp.ncbi.nlm.nih.gov/genomes/all/GCA/002/672/755/GCA_002672755.1_ASM267275v1								ftp://ftp.ncbi.nlm.nih.gov/genomes/all/GCF/000/417/265/GCF_000417265.2_ASM41726v2
ftp://ftp.ncbi.nlm.nih.gov/genomes/all/GCA/002/672/775/GCA_002672775.1_ASM267277v1								ftp://ftp.ncbi.nlm.nih.gov/genomes/all/GCF/000/465/975/GCF_000465975.2_ASM46597v2
ftp://ftp.ncbi.nlm.nih.gov/genomes/all/GCA/002/672/795/GCA_002672795.1_ASM267279v1								ftp://ftp.ncbi.nlm.nih.gov/genomes/all/GCF/000/597/905/GCF_000597905.1_ASM59790v1
ftp://ftp.ncbi.nlm.nih.gov/genomes/all/GCA/002/604/705/GCA_002604705.1_ASM260470v1								ftp://ftp.ncbi.nlm.nih.gov/genomes/all/GCF/000/598/005/GCF_000598005.1_ASM59800v1
ftp://ftp.ncbi.nlm.nih.gov/genomes/all/GCA/001/045/305/GCA_001045305.1_ViralProj288325								ftp://ftp.ncbi.nlm.nih.gov/genomes/all/GCF/000/695/935/GCF_000695935.1_ASM69593v1
ftp://ftp.ncbi.nlm.nih.gov/genomes/all/GCA/001/550/905/GCA_001550905.1_ViralProj310903								ftp://ftp.ncbi.nlm.nih.gov/genomes/all/GCF/000/714/675/GCF_000714675.1_ASM71467v1
ftp://ftp.ncbi.nlm.nih.gov/genomes/all/GCA/001/045/365/GCA_001045365.1_ViralProj288352								ftp://ftp.ncbi.nlm.nih.gov/genomes/all/GCF/000/717/515/GCF_000717515.1_ASM71751v1
ftp://ftp.ncbi.nlm.nih.gov/genomes/all/GCA/001/551/225/GCA_001551225.1_ViralProj310901								ftp://ftp.ncbi.nlm.nih.gov/genomes/all/GCF/000/733/255/GCF_000733255.1_ASM73325v1
ftp://ftp.ncbi.nlm.nih.gov/genomes/all/GCA/001/550/505/GCA_001550505.1_ViralProj310898								ftp://ftp.ncbi.nlm.nih.gov/genomes/all/GCF/000/739/495/GCF_000739495.1_ASM73949v1
ftp://ftp.ncbi.nlm.nih.gov/genomes/all/GCA/002/595/205/GCA_002595205.1_ASM259520v1								ftp://ftp.ncbi.nlm.nih.gov/genomes/all/GCF/000/742/755/GCF_000742755.1_ASM74275v1
ftp://ftp.ncbi.nlm.nih.gov/genomes/all/GCA/002/595/225/GCA_002595225.1_ASM259522v1								ftp://ftp.ncbi.nlm.nih.gov/genomes/all/GCF/000/764/615/GCF_000764615.1_ASM76461v1
ftp://ftp.ncbi.nlm.nih.gov/genomes/all/GCA/002/595/245/GCA_002595245.1_ASM259524v1								ftp://ftp.ncbi.nlm.nih.gov/genomes/all/GCF/000/775/375/GCF_000775375.1_ASM77537v1
ftp://ftp.ncbi.nlm.nih.gov/genomes/all/GCA/002/595/265/GCA_002595265.1_ASM259526v1								ftp://ftp.ncbi.nlm.nih.gov/genomes/all/GCF/000/775/395/GCF_000775395.1_ASM77539v1
ftp://ftp.ncbi.nlm.nih.gov/genomes/all/GCA/002/595/285/GCA_002595285.1_ASM259528v1								ftp://ftp.ncbi.nlm.nih.gov/genomes/all/GCF/000/775/955/GCF_000775955.1_ASM77595v1
ftp://ftp.ncbi.nlm.nih.gov/genomes/all/GCA/002/595/305/GCA_002595305.1_ASM259530v1								ftp://ftp.ncbi.nlm.nih.gov/genomes/all/GCF/000/784/945/GCF_000784945.1_ASM78494v1
ftp://ftp.ncbi.nlm.nih.gov/genomes/all/GCA/002/595/325/GCA_002595325.1_ASM259532v1								ftp://ftp.ncbi.nlm.nih.gov/genomes/all/GCF/000/784/985/GCF_000784985.1_ASM78498v1
ftp://ftp.ncbi.nlm.nih.gov/genomes/all/GCA/002/595/345/GCA_002595345.1_ASM259534v1								ftp://ftp.ncbi.nlm.nih.gov/genomes/all/GCF/000/785/005/GCF_000785005.1_ASM78500v1
ftp://ftp.ncbi.nlm.nih.gov/genomes/all/GCA/002/595/365/GCA_002595365.1_ASM259536v1								ftp://ftp.ncbi.nlm.nih.gov/genomes/all/GCF/000/807/395/GCF_000807395.2_ASM80739v3
ftp://ftp.ncbi.nlm.nih.gov/genomes/all/GCA/002/595/385/GCA_002595385.1_ASM259538v1								ftp://ftp.ncbi.nlm.nih.gov/genomes/all/GCF/000/813/205/GCF_000813205.1_ASM81320v1
ftp://ftp.ncbi.nlm.nih.gov/genomes/all/GCA/002/595/405/GCA_002595405.1_ASM259540v1								ftp://ftp.ncbi.nlm.nih.gov/genomes/all/GCF/000/814/305/GCF_000814305.1_ASM81430v1
ftp://ftp.ncbi.nlm.nih.gov/genomes/all/GCA/002/595/425/GCA_002595425.1_ASM259542v1								ftp://ftp.ncbi.nlm.nih.gov/genomes/all/GCF/000/814/805/GCF_000814805.1_ASM81480v1
ftp://ftp.ncbi.nlm.nih.gov/genomes/all/GCA/002/595/445/GCA_002595445.1_ASM259544v1								ftp://ftp.ncbi.nlm.nih.gov/genomes/all/GCF/000/968/155/GCF_000968155.1_ASM96815v1
ftp://ftp.ncbi.nlm.nih.gov/genomes/all/GCA/002/595/465/GCA_002595465.1_ASM259546v1								ftp://ftp.ncbi.nlm.nih.gov/genomes/all/GCF/000/981/845/GCF_000981845.1_ASM98184v1
ftp://ftp.ncbi.nlm.nih.gov/genomes/all/GCA/002/595/485/GCA_002595485.1_ASM259548v1								ftp://ftp.ncbi.nlm.nih.gov/genomes/all/GCF/001/022/035/GCF_001022035.1_ASM102203v1
ftp://ftp.ncbi.nlm.nih.gov/genomes/all/GCA/002/595/505/GCA_002595505.1_ASM259550v1								ftp://ftp.ncbi.nlm.nih.gov/genomes/all/GCF/001/022/175/GCF_001022175.1_ASM102217v1
ftp://ftp.ncbi.nlm.nih.gov/genomes/all/GCA/002/595/525/GCA_002595525.1_ASM259552v1								ftp://ftp.ncbi.nlm.nih.gov/genomes/all/GCF/001/022/235/GCF_001022235.1_ASM102223v1
ftp://ftp.ncbi.nlm.nih.gov/genomes/all/GCA/002/595/545/GCA_002595545.1_ASM259554v1								ftp://ftp.ncbi.nlm.nih.gov/genomes/all/GCF/001/280/925/GCF_001280925.1_ASM128092v1
ftp://ftp.ncbi.nlm.nih.gov/genomes/all/GCA/002/595/565/GCA_002595565.1_ASM259556v1								ftp://ftp.ncbi.nlm.nih.gov/genomes/all/GCF/001/307/175/GCF_001307175.1_ASM130717v1
ftp://ftp.ncbi.nlm.nih.gov/genomes/all/GCA/002/595/585/GCA_002595585.1_ASM259558v1								ftp://ftp.ncbi.nlm.nih.gov/genomes/all/GCF/001/316/565/GCF_001316565.3_ASM131656v3
ftp://ftp.ncbi.nlm.nih.gov/genomes/all/GCA/001/504/355/GCA_001504355.1_ViralProj307938								ftp://ftp.ncbi.nlm.nih.gov/genomes/all/GCF/001/455/995/GCF_001455995.1_MS6671.v1
ftp://ftp.ncbi.nlm.nih.gov/genomes/all/GCA/002/819/185/GCA_002819185.1_ASM281918v1								ftp://ftp.ncbi.nlm.nih.gov/genomes/all/GCF/001/456/055/GCF_001456055.3_ASM145605v3
ftp://ftp.ncbi.nlm.nih.gov/genomes/all/GCA/001/501/535/GCA_001501535.1_ViralProj307807								ftp://ftp.ncbi.nlm.nih.gov/genomes/all/GCF/001/456/095/GCF_001456095.3_ASM145609v3
ftp://ftp.ncbi.nlm.nih.gov/genomes/all/GCA/001/190/085/GCA_001190085.1_ViralProj291270								ftp://ftp.ncbi.nlm.nih.gov/genomes/all/GCF/001/456/135/GCF_001456135.1_ASM145613v1
ftp://ftp.ncbi.nlm.nih.gov/genomes/all/GCA/001/190/275/GCA_001190275.1_ViralProj291264								ftp://ftp.ncbi.nlm.nih.gov/genomes/all/GCF/001/482/345/GCF_001482345.1_ASM148234v1
ftp://ftp.ncbi.nlm.nih.gov/genomes/all/GCA/001/190/295/GCA_001190295.1_ViralProj291268								ftp://ftp.ncbi.nlm.nih.gov/genomes/all/GCF/001/521/895/GCF_001521895.1_ASM152189v1
ftp://ftp.ncbi.nlm.nih.gov/genomes/all/GCA/001/190/315/GCA_001190315.1_ViralProj291272								ftp://ftp.ncbi.nlm.nih.gov/genomes/all/GCF/001/529/935/GCF_001529935.1_ASM152993v1
ftp://ftp.ncbi.nlm.nih.gov/genomes/all/GCA/001/190/415/GCA_001190415.1_ViralProj291263								ftp://ftp.ncbi.nlm.nih.gov/genomes/all/GCF/001/530/015/GCF_001530015.1_ASM153001v1
ftp://ftp.ncbi.nlm.nih.gov/genomes/all/GCA/001/190/435/GCA_001190435.1_ViralProj291267								ftp://ftp.ncbi.nlm.nih.gov/genomes/all/GCF/001/548/315/GCF_001548315.1_ASM154831v1
ftp://ftp.ncbi.nlm.nih.gov/genomes/all/GCA/001/190/455/GCA_001190455.1_ViralProj291271								ftp://ftp.ncbi.nlm.nih.gov/genomes/all/GCF/001/611/055/GCF_001611055.1_ASM161105v1
ftp://ftp.ncbi.nlm.nih.gov/genomes/all/GCA/001/190/575/GCA_001190575.1_ViralProj291266								ftp://ftp.ncbi.nlm.nih.gov/genomes/all/GCF/001/611/095/GCF_001611095.1_ASM161109v1
ftp://ftp.ncbi.nlm.nih.gov/genomes/all/GCA/001/190/695/GCA_001190695.1_ViralProj291265								ftp://ftp.ncbi.nlm.nih.gov/genomes/all/GCF/001/644/765/GCF_001644765.1_ASM164476v1
ftp://ftp.ncbi.nlm.nih.gov/genomes/all/GCA/001/190/715/GCA_001190715.1_ViralProj291269								ftp://ftp.ncbi.nlm.nih.gov/genomes/all/GCF/001/646/625/GCF_001646625.1_ASM164662v1
ftp://ftp.ncbi.nlm.nih.gov/genomes/all/GCA/001/190/735/GCA_001190735.1_ViralProj291273								ftp://ftp.ncbi.nlm.nih.gov/genomes/all/GCF/001/648/215/GCF_001648215.1_ASM164821v1
ftp://ftp.ncbi.nlm.nih.gov/genomes/all/GCA/001/470/115/GCA_001470115.1_ViralProj306290								ftp://ftp.ncbi.nlm.nih.gov/genomes/all/GCF/001/663/195/GCF_001663195.1_ASM166319v1
ftp://ftp.ncbi.nlm.nih.gov/genomes/all/GCA/001/470/215/GCA_001470215.1_ViralProj306346								ftp://ftp.ncbi.nlm.nih.gov/genomes/all/GCF/001/663/295/GCF_001663295.1_ASM166329v1
ftp://ftp.ncbi.nlm.nih.gov/genomes/all/GCA/001/551/565/GCA_001551565.1_ViralProj310900								ftp://ftp.ncbi.nlm.nih.gov/genomes/all/GCF/001/663/435/GCF_001663435.1_ASM166343v1
ftp://ftp.ncbi.nlm.nih.gov/genomes/all/GCA/002/606/605/GCA_002606605.1_ASM260660v1								ftp://ftp.ncbi.nlm.nih.gov/genomes/all/GCF/001/663/455/GCF_001663455.1_ASM166345v1
ftp://ftp.ncbi.nlm.nih.gov/genomes/all/GCA/002/623/025/GCA_002623025.1_ASM262302v1								ftp://ftp.ncbi.nlm.nih.gov/genomes/all/GCF/001/675/125/GCF_001675125.1_ASM167512v1
ftp://ftp.ncbi.nlm.nih.gov/genomes/all/GCA/002/756/655/GCA_002756655.1_ASM275665v1								ftp://ftp.ncbi.nlm.nih.gov/genomes/all/GCF/001/676/825/GCF_001676825.1_ASM167682v1
ftp://ftp.ncbi.nlm.nih.gov/genomes/all/GCA/002/756/675/GCA_002756675.1_ASM275667v1								ftp://ftp.ncbi.nlm.nih.gov/genomes/all/GCF/001/704/235/GCF_001704235.1_ASM170423v1
ftp://ftp.ncbi.nlm.nih.gov/genomes/all/GCA/002/756/635/GCA_002756635.1_ASM275663v1								ftp://ftp.ncbi.nlm.nih.gov/genomes/all/GCF/001/705/385/GCF_001705385.1_ASM170538v1
ftp://ftp.ncbi.nlm.nih.gov/genomes/all/GCA/002/605/345/GCA_002605345.1_ASM260534v1								ftp://ftp.ncbi.nlm.nih.gov/genomes/all/GCF/001/708/225/GCF_001708225.1_ASM170822v1
ftp://ftp.ncbi.nlm.nih.gov/genomes/all/GCA/001/184/845/GCA_001184845.1_ViralProj289889								ftp://ftp.ncbi.nlm.nih.gov/genomes/all/GCF/001/708/245/GCF_001708245.1_ASM170824v1
ftp://ftp.ncbi.nlm.nih.gov/genomes/all/GCA/001/185/005/GCA_001185005.1_ViralMultiSegProj290358								ftp://ftp.ncbi.nlm.nih.gov/genomes/all/GCF/001/709/275/GCF_001709275.1_ASM170927v1
ftp://ftp.ncbi.nlm.nih.gov/genomes/all/GCA/001/184/825/GCA_001184825.1_ViralMultiSegProj290353								ftp://ftp.ncbi.nlm.nih.gov/genomes/all/GCF/001/709/295/GCF_001709295.1_ASM170929v1
ftp://ftp.ncbi.nlm.nih.gov/genomes/all/GCA/001/184/885/GCA_001184885.1_ViralMultiSegProj290354								ftp://ftp.ncbi.nlm.nih.gov/genomes/all/GCF/001/721/725/GCF_001721725.1_ASM172172v1
ftp://ftp.ncbi.nlm.nih.gov/genomes/all/GCA/001/184/905/GCA_001184905.1_ViralMultiSegProj290067								ftp://ftp.ncbi.nlm.nih.gov/genomes/all/GCF/001/741/545/GCF_001741545.1_ASM174154v1
ftp://ftp.ncbi.nlm.nih.gov/genomes/all/GCA/001/184/925/GCA_001184925.1_ViralMultiSegProj290352								ftp://ftp.ncbi.nlm.nih.gov/genomes/all/GCF/001/741/665/GCF_001741665.1_ASM174166v1
ftp://ftp.ncbi.nlm.nih.gov/genomes/all/GCA/001/184/945/GCA_001184945.1_ViralProj290360								ftp://ftp.ncbi.nlm.nih.gov/genomes/all/GCF/001/746/535/GCF_001746535.1_ASM174653v1
ftp://ftp.ncbi.nlm.nih.gov/genomes/all/GCA/001/503/095/GCA_001503095.1_ViralProj307845								ftp://ftp.ncbi.nlm.nih.gov/genomes/all/GCF/001/750/805/GCF_001750805.1_ASM175080v1
ftp://ftp.ncbi.nlm.nih.gov/genomes/all/GCA/001/504/695/GCA_001504695.1_ViralProj307844								ftp://ftp.ncbi.nlm.nih.gov/genomes/all/GCF/001/855/315/GCF_001855315.1_ASM185531v1
ftp://ftp.ncbi.nlm.nih.gov/genomes/all/GCA/001/550/705/GCA_001550705.1_ViralProj310938								ftp://ftp.ncbi.nlm.nih.gov/genomes/all/GCF/001/870/165/GCF_001870165.1_ASM187016v1
ftp://ftp.ncbi.nlm.nih.gov/genomes/all/GCA/002/606/945/GCA_002606945.1_ASM260694v1								ftp://ftp.ncbi.nlm.nih.gov/genomes/all/GCF/001/885/255/GCF_001885255.2_ASM188525v2
ftp://ftp.ncbi.nlm.nih.gov/genomes/all/GCA/001/184/865/GCA_001184865.1_ViralProj290310								ftp://ftp.ncbi.nlm.nih.gov/genomes/all/GCF/001/902/195/GCF_001902195.1_ASM190219v1
ftp://ftp.ncbi.nlm.nih.gov/genomes/all/GCA/001/500/435/GCA_001500435.1_ViralProj307718								ftp://ftp.ncbi.nlm.nih.gov/genomes/all/GCF/001/902/215/GCF_001902215.1_ASM190221v1
ftp://ftp.ncbi.nlm.nih.gov/genomes/all/GCA/001/500/475/GCA_001500475.1_ViralProj307726								ftp://ftp.ncbi.nlm.nih.gov/genomes/all/GCF/001/902/235/GCF_001902235.1_ASM190223v1
ftp://ftp.ncbi.nlm.nih.gov/genomes/all/GCA/001/501/095/GCA_001501095.1_ViralProj307719								ftp://ftp.ncbi.nlm.nih.gov/genomes/all/GCF/001/902/255/GCF_001902255.1_ASM190225v1
ftp://ftp.ncbi.nlm.nih.gov/genomes/all/GCA/001/501/115/GCA_001501115.1_ViralProj307723								ftp://ftp.ncbi.nlm.nih.gov/genomes/all/GCF/001/902/335/GCF_001902335.1_ASM190233v1
ftp://ftp.ncbi.nlm.nih.gov/genomes/all/GCA/001/501/195/GCA_001501195.1_ViralProj307739								ftp://ftp.ncbi.nlm.nih.gov/genomes/all/GCF/001/902/355/GCF_001902355.1_ASM190235v1
ftp://ftp.ncbi.nlm.nih.gov/genomes/all/GCA/001/501/555/GCA_001501555.1_ViralProj307811								ftp://ftp.ncbi.nlm.nih.gov/genomes/all/GCF/001/902/395/GCF_001902395.1_ASM190239v1
ftp://ftp.ncbi.nlm.nih.gov/genomes/all/GCA/001/501/875/GCA_001501875.1_ViralProj307720								ftp://ftp.ncbi.nlm.nih.gov/genomes/all/GCF/001/902/415/GCF_001902415.1_ASM190241v1
ftp://ftp.ncbi.nlm.nih.gov/genomes/all/GCA/001/551/205/GCA_001551205.1_ViralProj310897								ftp://ftp.ncbi.nlm.nih.gov/genomes/all/GCF/001/902/435/GCF_001902435.1_ASM190243v1
ftp://ftp.ncbi.nlm.nih.gov/genomes/all/GCA/001/550/645/GCA_001550645.1_ViralProj310926								ftp://ftp.ncbi.nlm.nih.gov/genomes/all/GCF/001/902/475/GCF_001902475.1_ASM190247v1
ftp://ftp.ncbi.nlm.nih.gov/genomes/all/GCA/002/756/715/GCA_002756715.1_ASM275671v1								ftp://ftp.ncbi.nlm.nih.gov/genomes/all/GCF/001/902/515/GCF_001902515.1_ASM190251v1
ftp://ftp.ncbi.nlm.nih.gov/genomes/all/GCA/002/597/725/GCA_002597725.1_ASM259772v1								ftp://ftp.ncbi.nlm.nih.gov/genomes/all/GCF/001/902/535/GCF_001902535.1_ASM190253v1
ftp://ftp.ncbi.nlm.nih.gov/genomes/all/GCA/002/597/745/GCA_002597745.1_ASM259774v1								ftp://ftp.ncbi.nlm.nih.gov/genomes/all/GCF/001/908/515/GCF_001908515.1_ASM190851v1
ftp://ftp.ncbi.nlm.nih.gov/genomes/all/GCA/001/271/235/GCA_001271235.1_ViralProj293081								ftp://ftp.ncbi.nlm.nih.gov/genomes/all/GCF/001/908/595/GCF_001908595.1_ASM190859v1
ftp://ftp.ncbi.nlm.nih.gov/genomes/all/GCA/001/271/155/GCA_001271155.1_ViralProj293053								ftp://ftp.ncbi.nlm.nih.gov/genomes/all/GCF/001/908/625/GCF_001908625.1_ASM190862v1
ftp://ftp.ncbi.nlm.nih.gov/genomes/all/GCA/002/623/245/GCA_002623245.1_ASM262324v1								ftp://ftp.ncbi.nlm.nih.gov/genomes/all/GCF/001/908/655/GCF_001908655.1_ASM190865v1
ftp://ftp.ncbi.nlm.nih.gov/genomes/all/GCA/001/502/955/GCA_001502955.1_ViralProj307813								ftp://ftp.ncbi.nlm.nih.gov/genomes/all/GCF/001/908/675/GCF_001908675.1_ASM190867v1
ftp://ftp.ncbi.nlm.nih.gov/genomes/all/GCA/001/500/595/GCA_001500595.1_ViralProj307750								ftp://ftp.ncbi.nlm.nih.gov/genomes/all/GCF/001/908/695/GCF_001908695.1_ASM190869v1
ftp://ftp.ncbi.nlm.nih.gov/genomes/all/GCA/001/502/635/GCA_001502635.1_ViralProj307749								ftp://ftp.ncbi.nlm.nih.gov/genomes/all/GCF/001/908/715/GCF_001908715.1_ASM190871v1
ftp://ftp.ncbi.nlm.nih.gov/genomes/all/GCA/002/623/325/GCA_002623325.1_ASM262332v1								ftp://ftp.ncbi.nlm.nih.gov/genomes/all/GCF/001/908/875/GCF_001908875.1_ASM190887v1
ftp://ftp.ncbi.nlm.nih.gov/genomes/all/GCA/001/500/515/GCA_001500515.1_ViralProj307734								ftp://ftp.ncbi.nlm.nih.gov/genomes/all/GCF/001/908/895/GCF_001908895.1_ASM190889v1
ftp://ftp.ncbi.nlm.nih.gov/genomes/all/GCA/001/500/875/GCA_001500875.1_ViralProj307806								ftp://ftp.ncbi.nlm.nih.gov/genomes/all/GCF/001/913/175/GCF_001913175.1_ASM191317v1
ftp://ftp.ncbi.nlm.nih.gov/genomes/all/GCA/001/500/915/GCA_001500915.1_ViralProj307814								ftp://ftp.ncbi.nlm.nih.gov/genomes/all/GCF/001/922/465/GCF_001922465.1_ASM192246v1
ftp://ftp.ncbi.nlm.nih.gov/genomes/all/GCA/002/819/225/GCA_002819225.1_ASM281922v1								ftp://ftp.ncbi.nlm.nih.gov/genomes/all/GCF/001/936/035/GCF_001936035.1_ASM193603v1
ftp://ftp.ncbi.nlm.nih.gov/genomes/all/GCA/001/501/955/GCA_001501955.1_ViralProj307736								ftp://ftp.ncbi.nlm.nih.gov/genomes/all/GCF/001/952/835/GCF_001952835.1_ASM195283v1
ftp://ftp.ncbi.nlm.nih.gov/genomes/all/GCA/002/680/375/GCA_002680375.1_ASM268037v1								ftp://ftp.ncbi.nlm.nih.gov/genomes/all/GCF/001/952/875/GCF_001952875.1_ASM195287v1
ftp://ftp.ncbi.nlm.nih.gov/genomes/all/GCA/001/271/095/GCA_001271095.1_ViralProj292100								ftp://ftp.ncbi.nlm.nih.gov/genomes/all/GCF/001/952/895/GCF_001952895.1_ASM195289v1
ftp://ftp.ncbi.nlm.nih.gov/genomes/all/GCA/002/662/515/GCA_002662515.1_ASM266251v1								ftp://ftp.ncbi.nlm.nih.gov/genomes/all/GCF/001/952/915/GCF_001952915.1_ASM195291v1
ftp://ftp.ncbi.nlm.nih.gov/genomes/all/GCA/001/271/175/GCA_001271175.1_ViralProj293044								ftp://ftp.ncbi.nlm.nih.gov/genomes/all/GCF/001/956/965/GCF_001956965.1_ASM195696v1
ftp://ftp.ncbi.nlm.nih.gov/genomes/all/GCA/001/274/405/GCA_001274405.1_ViralProj293685								ftp://ftp.ncbi.nlm.nih.gov/genomes/all/GCF/002/009/075/GCF_002009075.1_ASM200907v1
ftp://ftp.ncbi.nlm.nih.gov/genomes/all/GCA/001/470/755/GCA_001470755.1_ViralProj306345								ftp://ftp.ncbi.nlm.nih.gov/genomes/all/GCF/002/055/765/GCF_002055765.1_ASM205576v1
ftp://ftp.ncbi.nlm.nih.gov/genomes/all/GCA/001/500/895/GCA_001500895.1_ViralProj307810								ftp://ftp.ncbi.nlm.nih.gov/genomes/all/GCF/002/055/855/GCF_002055855.1_ASM205585v1
ftp://ftp.ncbi.nlm.nih.gov/genomes/all/GCA/001/501/135/GCA_001501135.1_ViralProj307727								ftp://ftp.ncbi.nlm.nih.gov/genomes/all/GCF/002/056/385/GCF_002056385.1_ASM205638v1
ftp://ftp.ncbi.nlm.nih.gov/genomes/all/GCA/001/501/915/GCA_001501915.1_ViralProj307728								ftp://ftp.ncbi.nlm.nih.gov/genomes/all/GCF/002/056/475/GCF_002056475.1_ASM205647v1
ftp://ftp.ncbi.nlm.nih.gov/genomes/all/GCA/001/502/315/GCA_001502315.1_ViralProj307808								ftp://ftp.ncbi.nlm.nih.gov/genomes/all/GCF/002/113/865/GCF_002113865.1_ASM211386v1
ftp://ftp.ncbi.nlm.nih.gov/genomes/all/GCA/001/502/335/GCA_001502335.1_ViralProj307812								ftp://ftp.ncbi.nlm.nih.gov/genomes/all/GCF/002/116/885/GCF_002116885.1_ASM211688v1
ftp://ftp.ncbi.nlm.nih.gov/genomes/all/GCA/001/502/395/GCA_001502395.1_ViralProj307201								ftp://ftp.ncbi.nlm.nih.gov/genomes/all/GCF/002/156/725/GCF_002156725.1_ASM215672v1
ftp://ftp.ncbi.nlm.nih.gov/genomes/all/GCA/001/502/515/GCA_001502515.1_ViralProj307725								ftp://ftp.ncbi.nlm.nih.gov/genomes/all/GCF/002/156/745/GCF_002156745.1_ASM215674v1
ftp://ftp.ncbi.nlm.nih.gov/genomes/all/GCA/001/502/535/GCA_001502535.1_ViralProj307729								ftp://ftp.ncbi.nlm.nih.gov/genomes/all/GCF/002/156/765/GCF_002156765.1_ASM215676v1
ftp://ftp.ncbi.nlm.nih.gov/genomes/all/GCA/001/502/935/GCA_001502935.1_ViralProj307809								ftp://ftp.ncbi.nlm.nih.gov/genomes/all/GCF/002/156/785/GCF_002156785.1_ASM215678v1
ftp://ftp.ncbi.nlm.nih.gov/genomes/all/GCA/001/551/025/GCA_001551025.1_ViralProj310927								ftp://ftp.ncbi.nlm.nih.gov/genomes/all/GCF/002/163/895/GCF_002163895.1_ASM216389v1
ftp://ftp.ncbi.nlm.nih.gov/genomes/all/GCA/002/149/185/GCA_002149185.1_ViralProj266637.13								ftp://ftp.ncbi.nlm.nih.gov/genomes/all/GCF/002/180/075/GCF_002180075.1_ASM218007v1
ftp://ftp.ncbi.nlm.nih.gov/genomes/all/GCA/002/149/285/GCA_002149285.1_ViralProj266637.11								ftp://ftp.ncbi.nlm.nih.gov/genomes/all/GCF/002/180/155/GCF_002180155.1_ASM218015v1
ftp://ftp.ncbi.nlm.nih.gov/genomes/all/GCA/002/149/565/GCA_002149565.1_ViralProj266637.12								ftp://ftp.ncbi.nlm.nih.gov/genomes/all/GCF/002/180/175/GCF_002180175.1_ASM218017v1
ftp://ftp.ncbi.nlm.nih.gov/genomes/all/GCA/002/601/505/GCA_002601505.1_ASM260150v1								ftp://ftp.ncbi.nlm.nih.gov/genomes/all/GCF/002/180/255/GCF_002180255.1_ASM218025v1
ftp://ftp.ncbi.nlm.nih.gov/genomes/all/GCA/002/606/885/GCA_002606885.1_ASM260688v1								ftp://ftp.ncbi.nlm.nih.gov/genomes/all/GCF/002/180/295/GCF_002180295.1_ASM218029v1
ftp://ftp.ncbi.nlm.nih.gov/genomes/all/GCA/002/606/925/GCA_002606925.1_ASM260692v1								ftp://ftp.ncbi.nlm.nih.gov/genomes/all/GCF/002/180/315/GCF_002180315.1_ASM218031v1
ftp://ftp.ncbi.nlm.nih.gov/genomes/all/GCA/002/607/045/GCA_002607045.1_ASM260704v1								ftp://ftp.ncbi.nlm.nih.gov/genomes/all/GCF/002/192/315/GCF_002192315.1_ASM219231v1
ftp://ftp.ncbi.nlm.nih.gov/genomes/all/GCA/002/607/065/GCA_002607065.1_ASM260706v1								ftp://ftp.ncbi.nlm.nih.gov/genomes/all/GCF/002/192/335/GCF_002192335.1_ASM219233v1
ftp://ftp.ncbi.nlm.nih.gov/genomes/all/GCA/002/607/085/GCA_002607085.1_ASM260708v1								ftp://ftp.ncbi.nlm.nih.gov/genomes/all/GCF/002/192/375/GCF_002192375.1_ASM219237v1
ftp://ftp.ncbi.nlm.nih.gov/genomes/all/GCA/002/607/105/GCA_002607105.1_ASM260710v1								ftp://ftp.ncbi.nlm.nih.gov/genomes/all/GCF/002/197/225/GCF_002197225.1_ASM219722v1
ftp://ftp.ncbi.nlm.nih.gov/genomes/all/GCA/002/623/345/GCA_002623345.1_ASM262334v1								ftp://ftp.ncbi.nlm.nih.gov/genomes/all/GCF/002/197/505/GCF_002197505.1_ASM219750v1
ftp://ftp.ncbi.nlm.nih.gov/genomes/all/GCA/002/624/505/GCA_002624505.1_ASM262450v1								ftp://ftp.ncbi.nlm.nih.gov/genomes/all/GCF/002/202/195/GCF_002202195.1_ASM220219v1
ftp://ftp.ncbi.nlm.nih.gov/genomes/all/GCA/002/756/615/GCA_002756615.1_ASM275661v1								ftp://ftp.ncbi.nlm.nih.gov/genomes/all/GCF/002/202/215/GCF_002202215.1_ASM220221v1
ftp://ftp.ncbi.nlm.nih.gov/genomes/all/GCA/002/756/695/GCA_002756695.1_ASM275669v1								ftp://ftp.ncbi.nlm.nih.gov/genomes/all/GCF/002/202/235/GCF_002202235.1_ASM220223v1
ftp://ftp.ncbi.nlm.nih.gov/genomes/all/GCA/002/607/025/GCA_002607025.1_ASM260702v1								ftp://ftp.ncbi.nlm.nih.gov/genomes/all/GCF/002/202/255/GCF_002202255.1_ASM220225v1
ftp://ftp.ncbi.nlm.nih.gov/genomes/all/GCA/002/646/535/GCA_002646535.1_ASM264653v1								ftp://ftp.ncbi.nlm.nih.gov/genomes/all/GCF/002/202/275/GCF_002202275.1_ASM220227v1
ftp://ftp.ncbi.nlm.nih.gov/genomes/all/GCA/002/646/695/GCA_002646695.1_ASM264669v1								ftp://ftp.ncbi.nlm.nih.gov/genomes/all/GCF/002/209/405/GCF_002209405.1_ASM220940v1
ftp://ftp.ncbi.nlm.nih.gov/genomes/all/GCA/002/646/895/GCA_002646895.1_ASM264689v1								ftp://ftp.ncbi.nlm.nih.gov/genomes/all/GCF/002/211/905/GCF_002211905.1_ASM221190v1
ftp://ftp.ncbi.nlm.nih.gov/genomes/all/GCA/001/470/395/GCA_001470395.1_ViralProj306296								ftp://ftp.ncbi.nlm.nih.gov/genomes/all/GCF/002/243/445/GCF_002243445.1_ASM224344v1
ftp://ftp.ncbi.nlm.nih.gov/genomes/all/GCA/001/470/695/GCA_001470695.1_ViralProj306297								ftp://ftp.ncbi.nlm.nih.gov/genomes/all/GCF/002/249/975/GCF_002249975.1_ASM224997v1
ftp://ftp.ncbi.nlm.nih.gov/genomes/all/GCA/001/736/875/GCA_001736875.1_ViralProj343532								ftp://ftp.ncbi.nlm.nih.gov/genomes/all/GCF/002/269/295/GCF_002269295.1_ASM226929v1
ftp://ftp.ncbi.nlm.nih.gov/genomes/all/GCA/001/274/225/GCA_001274225.2_ViralMultiSegProj293722								ftp://ftp.ncbi.nlm.nih.gov/genomes/all/GCF/002/278/055/GCF_002278055.1_ASM227805v1
ftp://ftp.ncbi.nlm.nih.gov/genomes/all/GCA/002/605/765/GCA_002605765.1_ASM260576v1								ftp://ftp.ncbi.nlm.nih.gov/genomes/all/GCF/002/587/165/GCF_002587165.1_ASM258716v1
ftp://ftp.ncbi.nlm.nih.gov/genomes/all/GCA/001/308/775/GCA_001308775.1_ViralProj298047								ftp://ftp.ncbi.nlm.nih.gov/genomes/all/GCF/002/587/885/GCF_002587885.1_ASM258788v1
ftp://ftp.ncbi.nlm.nih.gov/genomes/all/GCA/001/470/275/GCA_001470275.1_ViralProj306365								ftp://ftp.ncbi.nlm.nih.gov/genomes/all/GCF/002/591/075/GCF_002591075.1_ASM259107v1
ftp://ftp.ncbi.nlm.nih.gov/genomes/all/GCA/001/470/535/GCA_001470535.1_ViralProj306367								ftp://ftp.ncbi.nlm.nih.gov/genomes/all/GCF/002/741/685/GCF_002741685.1_ASM274168v1
ftp://ftp.ncbi.nlm.nih.gov/genomes/all/GCA/001/470/655/GCA_001470655.1_ViralProj306289								ftp://ftp.ncbi.nlm.nih.gov/genomes/all/GCF/002/752/775/GCF_002752775.1_ASM275277v1
ftp://ftp.ncbi.nlm.nih.gov/genomes/all/GCA/001/500/455/GCA_001500455.1_ViralProj307722								ftp://ftp.ncbi.nlm.nih.gov/genomes/all/GCF/002/752/815/GCF_002752815.1_ASM275281v1
ftp://ftp.ncbi.nlm.nih.gov/genomes/all/GCA/001/501/895/GCA_001501895.1_ViralProj307724								ftp://ftp.ncbi.nlm.nih.gov/genomes/all/GCF/002/752/905/GCF_002752905.1_ASM275290v1
ftp://ftp.ncbi.nlm.nih.gov/genomes/all/GCA/001/502/415/GCA_001502415.1_ViralProj307687								ftp://ftp.ncbi.nlm.nih.gov/genomes/all/GCF/002/752/955/GCF_002752955.1_ASM275295v1
ftp://ftp.ncbi.nlm.nih.gov/genomes/all/GCA/001/502/475/GCA_001502475.1_ViralProj307717								ftp://ftp.ncbi.nlm.nih.gov/genomes/all/GCF/002/752/975/GCF_002752975.1_ASM275297v1
ftp://ftp.ncbi.nlm.nih.gov/genomes/all/GCA/001/502/495/GCA_001502495.1_ViralProj307721								ftp://ftp.ncbi.nlm.nih.gov/genomes/all/GCF/002/752/995/GCF_002752995.1_ASM275299v1
ftp://ftp.ncbi.nlm.nih.gov/genomes/all/GCA/001/503/075/GCA_001503075.1_ViralProj307841								ftp://ftp.ncbi.nlm.nih.gov/genomes/all/GCF/002/753/015/GCF_002753015.1_ASM275301v1
ftp://ftp.ncbi.nlm.nih.gov/genomes/all/GCA/001/503/395/GCA_001503395.1_ViralProj307907								ftp://ftp.ncbi.nlm.nih.gov/genomes/all/GCF/002/753/035/GCF_002753035.1_ASM275303v1
ftp://ftp.ncbi.nlm.nih.gov/genomes/all/GCA/001/504/195/GCA_001504195.1_ViralProj307906								ftp://ftp.ncbi.nlm.nih.gov/genomes/all/GCF/002/753/055/GCF_002753055.1_ASM275305v1
ftp://ftp.ncbi.nlm.nih.gov/genomes/all/GCA/001/505/015/GCA_001505015.1_ViralProj307908								ftp://ftp.ncbi.nlm.nih.gov/genomes/all/GCF/002/753/075/GCF_002753075.1_ASM275307v1
ftp://ftp.ncbi.nlm.nih.gov/genomes/all/GCA/001/505/035/GCA_001505035.1_ViralProj307912								ftp://ftp.ncbi.nlm.nih.gov/genomes/all/GCF/002/753/165/GCF_002753165.1_ASM275316v1
ftp://ftp.ncbi.nlm.nih.gov/genomes/all/GCA/002/603/425/GCA_002603425.1_ASM260342v1								ftp://ftp.ncbi.nlm.nih.gov/genomes/all/GCF/002/753/355/GCF_002753355.1_ASM275335v1
ftp://ftp.ncbi.nlm.nih.gov/genomes/all/GCA/002/606/905/GCA_002606905.1_ASM260690v1								ftp://ftp.ncbi.nlm.nih.gov/genomes/all/GCF/002/753/375/GCF_002753375.1_ASM275337v1
ftp://ftp.ncbi.nlm.nih.gov/genomes/all/GCA/002/756/735/GCA_002756735.1_ASM275673v1								ftp://ftp.ncbi.nlm.nih.gov/genomes/all/GCF/002/753/405/GCF_002753405.1_ASM275340v1
ftp://ftp.ncbi.nlm.nih.gov/genomes/all/GCA/002/756/755/GCA_002756755.1_ASM275675v1								ftp://ftp.ncbi.nlm.nih.gov/genomes/all/GCF/002/753/555/GCF_002753555.1_ASM275355v1
ftp://ftp.ncbi.nlm.nih.gov/genomes/all/GCA/002/756/895/GCA_002756895.1_ASM275689v1								ftp://ftp.ncbi.nlm.nih.gov/genomes/all/GCF/002/753/605/GCF_002753605.1_ASM275360v1
ftp://ftp.ncbi.nlm.nih.gov/genomes/all/GCA/002/601/565/GCA_002601565.1_ASM260156v1								ftp://ftp.ncbi.nlm.nih.gov/genomes/all/GCF/002/754/835/GCF_002754835.1_ASM275483v1
ftp://ftp.ncbi.nlm.nih.gov/genomes/all/GCA/001/274/345/GCA_001274345.1_ViralProj293723								ftp://ftp.ncbi.nlm.nih.gov/genomes/all/GCF/002/761/315/GCF_002761315.1_ASM276131v1
ftp://ftp.ncbi.nlm.nih.gov/genomes/all/GCA/002/375/125/GCA_002375125.2_ASM237512v2								ftp://ftp.ncbi.nlm.nih.gov/genomes/all/GCF/002/761/515/GCF_002761515.1_ASM276151v1
ftp://ftp.ncbi.nlm.nih.gov/genomes/all/GCA/002/659/455/GCA_002659455.1_ASM265945v1								ftp://ftp.ncbi.nlm.nih.gov/genomes/all/GCF/002/786/755/GCF_002786755.1_ASM278675v1
ftp://ftp.ncbi.nlm.nih.gov/genomes/all/GCA/001/504/815/GCA_001504815.1_ViralProj307868								ftp://ftp.ncbi.nlm.nih.gov/genomes/all/GCF/002/787/755/GCF_002787755.1_ASM278775v1
ftp://ftp.ncbi.nlm.nih.gov/genomes/all/GCA/001/470/855/GCA_001470855.1_ViralProj306283								ftp://ftp.ncbi.nlm.nih.gov/genomes/all/GCF/002/811/335/GCF_002811335.2_ASM281133v2
ftp://ftp.ncbi.nlm.nih.gov/genomes/all/GCA/001/504/215/GCA_001504215.1_ViralProj307910								ftp://ftp.ncbi.nlm.nih.gov/genomes/all/GCF/002/812/365/GCF_002812365.1_ASM281236v1
ftp://ftp.ncbi.nlm.nih.gov/genomes/all/GCA/001/504/995/GCA_001504995.1_ViralProj307904								ftp://ftp.ncbi.nlm.nih.gov/genomes/all/GCF/002/812/385/GCF_002812385.1_ASM281238v1
ftp://ftp.ncbi.nlm.nih.gov/genomes/all/GCA/001/505/595/GCA_001505595.1_ViralProj307893								ftp://ftp.ncbi.nlm.nih.gov/genomes/all/GCF/002/812/665/GCF_002812665.1_ASM281266v1
ftp://ftp.ncbi.nlm.nih.gov/genomes/all/GCA/001/505/655/GCA_001505655.1_ViralProj307905								ftp://ftp.ncbi.nlm.nih.gov/genomes/all/GCF/002/813/595/GCF_002813595.1_ASM281359v1
ftp://ftp.ncbi.nlm.nih.gov/genomes/all/GCA/001/505/675/GCA_001505675.1_ViralProj307909								ftp://ftp.ncbi.nlm.nih.gov/genomes/all/GCF/002/814/015/GCF_002814015.1_ASM281401v1
ftp://ftp.ncbi.nlm.nih.gov/genomes/all/GCA/002/607/185/GCA_002607185.1_ASM260718v1								ftp://ftp.ncbi.nlm.nih.gov/genomes/all/GCF/002/833/425/GCF_002833425.1_ASM283342v1
ftp://ftp.ncbi.nlm.nih.gov/genomes/all/GCA/002/624/425/GCA_002624425.1_ASM262442v1								ftp://ftp.ncbi.nlm.nih.gov/genomes/all/GCF/002/833/445/GCF_002833445.1_ASM283344v1
ftp://ftp.ncbi.nlm.nih.gov/genomes/all/GCA/002/756/795/GCA_002756795.1_ASM275679v1								ftp://ftp.ncbi.nlm.nih.gov/genomes/all/GCF/002/833/465/GCF_002833465.1_ASM283346v1
ftp://ftp.ncbi.nlm.nih.gov/genomes/all/GCA/002/607/305/GCA_002607305.1_ASM260730v1								ftp://ftp.ncbi.nlm.nih.gov/genomes/all/GCF/002/848/545/GCF_002848545.1_ASM284854v1
ftp://ftp.ncbi.nlm.nih.gov/genomes/all/GCA/002/603/485/GCA_002603485.1_ASM260348v1								ftp://ftp.ncbi.nlm.nih.gov/genomes/all/GCF/002/848/565/GCF_002848565.1_ASM284856v1
ftp://ftp.ncbi.nlm.nih.gov/genomes/all/GCA/002/756/875/GCA_002756875.1_ASM275687v1								ftp://ftp.ncbi.nlm.nih.gov/genomes/all/GCF/002/848/585/GCF_002848585.1_ASM284858v1
ftp://ftp.ncbi.nlm.nih.gov/genomes/all/GCA/001/501/255/GCA_001501255.1_ViralProj307751								ftp://ftp.ncbi.nlm.nih.gov/genomes/all/GCF/002/893/825/GCF_002893825.1_ASM289382v1
ftp://ftp.ncbi.nlm.nih.gov/genomes/all/GCA/001/501/775/GCA_001501775.1_ViralProj307065								ftp://ftp.ncbi.nlm.nih.gov/genomes/all/GCF/002/903/005/GCF_002903005.1_ASM290300v1
ftp://ftp.ncbi.nlm.nih.gov/genomes/all/GCA/001/502/035/GCA_001502035.1_ViralProj307752								ftp://ftp.ncbi.nlm.nih.gov/genomes/all/GCF/002/903/025/GCF_002903025.1_ASM290302v1
ftp://ftp.ncbi.nlm.nih.gov/genomes/all/GCA/001/502/655/GCA_001502655.1_ViralProj307753								ftp://ftp.ncbi.nlm.nih.gov/genomes/all/GCF/000/783/935/GCF_000783935.2_ASM78393v2
ftp://ftp.ncbi.nlm.nih.gov/genomes/all/GCA/001/503/375/GCA_001503375.1_ViralProj307903								ftp://ftp.ncbi.nlm.nih.gov/genomes/all/GCF/000/783/955/GCF_000783955.2_ASM78395v2
ftp://ftp.ncbi.nlm.nih.gov/genomes/all/GCA/001/504/235/GCA_001504235.1_ViralProj307914								ftp://ftp.ncbi.nlm.nih.gov/genomes/all/GCF/001/558/895/GCF_001558895.1_ASM155889v1
ftp://ftp.ncbi.nlm.nih.gov/genomes/all/GCA/001/505/635/GCA_001505635.1_ViralProj307901								ftp://ftp.ncbi.nlm.nih.gov/genomes/all/GCF/002/386/305/GCF_002386305.1_ASM238630v1
ftp://ftp.ncbi.nlm.nih.gov/genomes/all/GCA/002/605/625/GCA_002605625.1_ASM260562v1								ftp://ftp.ncbi.nlm.nih.gov/genomes/all/GCF/002/891/475/GCF_002891475.1_ASM289147v1
ftp://ftp.ncbi.nlm.nih.gov/genomes/all/GCA/002/605/645/GCA_002605645.1_ASM260564v1								ftp://ftp.ncbi.nlm.nih.gov/genomes/all/GCF/000/783/575/GCF_000783575.2_ASM78357v2
ftp://ftp.ncbi.nlm.nih.gov/genomes/all/GCA/002/607/245/GCA_002607245.1_ASM260724v1								ftp://ftp.ncbi.nlm.nih.gov/genomes/all/GCF/000/783/595/GCF_000783595.2_ASM78359v2
ftp://ftp.ncbi.nlm.nih.gov/genomes/all/GCA/002/756/535/GCA_002756535.1_ASM275653v1								ftp://ftp.ncbi.nlm.nih.gov/genomes/all/GCF/000/784/015/GCF_000784015.2_ASM78401v2
ftp://ftp.ncbi.nlm.nih.gov/genomes/all/GCA/002/756/555/GCA_002756555.1_ASM275655v1								ftp://ftp.ncbi.nlm.nih.gov/genomes/all/GCF/001/281/545/GCF_001281545.1_ASM128154v1
ftp://ftp.ncbi.nlm.nih.gov/genomes/all/GCA/002/756/995/GCA_002756995.1_ASM275699v1								ftp://ftp.ncbi.nlm.nih.gov/genomes/all/GCF/001/281/565/GCF_001281565.1_ASM128156v1
ftp://ftp.ncbi.nlm.nih.gov/genomes/all/GCA/001/500/375/GCA_001500375.1_ViralProj307688								ftp://ftp.ncbi.nlm.nih.gov/genomes/all/GCF/001/640/985/GCF_001640985.1_ASM164098v1
ftp://ftp.ncbi.nlm.nih.gov/genomes/all/GCA/001/501/855/GCA_001501855.1_ViralProj307716								ftp://ftp.ncbi.nlm.nih.gov/genomes/all/GCF/002/055/685/GCF_002055685.1_ASM205568v1
ftp://ftp.ncbi.nlm.nih.gov/genomes/all/GCA/001/503/355/GCA_001503355.1_ViralProj307899								ftp://ftp.ncbi.nlm.nih.gov/genomes/all/GCF/002/180/115/GCF_002180115.1_ASM218011v1
ftp://ftp.ncbi.nlm.nih.gov/genomes/all/GCA/001/503/795/GCA_001503795.1_ViralProj308017								ftp://ftp.ncbi.nlm.nih.gov/genomes/all/GCF/002/180/235/GCF_002180235.1_ASM218023v1
ftp://ftp.ncbi.nlm.nih.gov/genomes/all/GCA/001/504/175/GCA_001504175.1_ViralProj307902								ftp://ftp.ncbi.nlm.nih.gov/genomes/all/GCF/002/197/405/GCF_002197405.1_ASM219740v1
ftp://ftp.ncbi.nlm.nih.gov/genomes/all/GCA/001/504/135/GCA_001504135.1_ViralProj307894								ftp://ftp.ncbi.nlm.nih.gov/genomes/all/GCF/002/310/875/GCF_002310875.1_ASM231087v1
ftp://ftp.ncbi.nlm.nih.gov/genomes/all/GCA/001/504/155/GCA_001504155.1_ViralProj307898								ftp://ftp.ncbi.nlm.nih.gov/genomes/all/GCF/002/310/895/GCF_002310895.1_ASM231089v1
ftp://ftp.ncbi.nlm.nih.gov/genomes/all/GCA/001/504/955/GCA_001504955.1_ViralProj307896								ftp://ftp.ncbi.nlm.nih.gov/genomes/all/GCF/002/591/155/GCF_002591155.1_ASM259115v1
ftp://ftp.ncbi.nlm.nih.gov/genomes/all/GCA/001/505/615/GCA_001505615.1_ViralProj307897								ftp://ftp.ncbi.nlm.nih.gov/genomes/all/GCF/001/874/625/GCF_001874625.1_ASM187462v1
ftp://ftp.ncbi.nlm.nih.gov/genomes/all/GCA/001/505/695/GCA_001505695.1_ViralProj307913								ftp://ftp.ncbi.nlm.nih.gov/genomes/all/GCF/000/754/345/GCF_000754345.1_ASM75434v1
ftp://ftp.ncbi.nlm.nih.gov/genomes/all/GCA/001/551/125/GCA_001551125.1_ViralProj310951								ftp://ftp.ncbi.nlm.nih.gov/genomes/all/GCF/001/558/855/GCF_001558855.2_ASM155885v2
ftp://ftp.ncbi.nlm.nih.gov/genomes/all/GCA/001/471/055/GCA_001471055.1_ViralProj306366								ftp://ftp.ncbi.nlm.nih.gov/genomes/all/GCF/001/888/205/GCF_001888205.1_ASM188820v1
ftp://ftp.ncbi.nlm.nih.gov/genomes/all/GCA/002/211/055/GCA_002211055.1_ViralProj308019								ftp://ftp.ncbi.nlm.nih.gov/genomes/all/GCF/000/975/245/GCF_000975245.1_ASM97524v1
ftp://ftp.ncbi.nlm.nih.gov/genomes/all/GCA/002/607/205/GCA_002607205.1_ASM260720v1								ftp://ftp.ncbi.nlm.nih.gov/genomes/all/GCF/000/783/915/GCF_000783915.2_ASM78391v2
ftp://ftp.ncbi.nlm.nih.gov/genomes/all/GCA/002/624/485/GCA_002624485.1_ASM262448v1								ftp://ftp.ncbi.nlm.nih.gov/genomes/all/GCF/000/828/775/GCF_000828775.1_ASM82877v1
ftp://ftp.ncbi.nlm.nih.gov/genomes/all/GCA/002/756/935/GCA_002756935.1_ASM275693v1								ftp://ftp.ncbi.nlm.nih.gov/genomes/all/GCF/001/022/215/GCF_001022215.1_ASM102221v1
ftp://ftp.ncbi.nlm.nih.gov/genomes/all/GCA/002/745/415/GCA_002745415.1_ASM274541v1								ftp://ftp.ncbi.nlm.nih.gov/genomes/all/GCF/001/280/365/GCF_001280365.1_ASM128036v1
ftp://ftp.ncbi.nlm.nih.gov/genomes/all/GCA/002/603/785/GCA_002603785.1_ASM260378v1								ftp://ftp.ncbi.nlm.nih.gov/genomes/all/GCF/001/294/565/GCF_001294565.1_ASM129456v1
ftp://ftp.ncbi.nlm.nih.gov/genomes/all/GCA/002/598/785/GCA_002598785.1_ASM259878v1								ftp://ftp.ncbi.nlm.nih.gov/genomes/all/GCF/001/417/865/GCF_001417865.2_ASM141786v2
ftp://ftp.ncbi.nlm.nih.gov/genomes/all/GCA/002/598/805/GCA_002598805.1_ASM259880v1								ftp://ftp.ncbi.nlm.nih.gov/genomes/all/GCF/002/220/515/GCF_002220515.1_ASM222051v1
ftp://ftp.ncbi.nlm.nih.gov/genomes/all/GCA/002/598/825/GCA_002598825.1_ASM259882v1								ftp://ftp.ncbi.nlm.nih.gov/genomes/all/GCF/002/220/535/GCF_002220535.1_ASM222053v1
ftp://ftp.ncbi.nlm.nih.gov/genomes/all/GCA/002/598/845/GCA_002598845.1_ASM259884v1								ftp://ftp.ncbi.nlm.nih.gov/genomes/all/GCF/002/220/555/GCF_002220555.1_ASM222055v1
ftp://ftp.ncbi.nlm.nih.gov/genomes/all/GCA/002/756/915/GCA_002756915.1_ASM275691v1								ftp://ftp.ncbi.nlm.nih.gov/genomes/all/GCF/002/220/575/GCF_002220575.1_ASM222057v1
ftp://ftp.ncbi.nlm.nih.gov/genomes/all/GCA/002/598/865/GCA_002598865.1_ASM259886v1								ftp://ftp.ncbi.nlm.nih.gov/genomes/all/GCF/002/220/595/GCF_002220595.1_ASM222059v1
ftp://ftp.ncbi.nlm.nih.gov/genomes/all/GCA/002/598/885/GCA_002598885.1_ASM259888v1								ftp://ftp.ncbi.nlm.nih.gov/genomes/all/GCF/002/220/615/GCF_002220615.1_ASM222061v1
ftp://ftp.ncbi.nlm.nih.gov/genomes/all/GCA/002/598/905/GCA_002598905.1_ASM259890v1								ftp://ftp.ncbi.nlm.nih.gov/genomes/all/GCF/002/220/635/GCF_002220635.1_ASM222063v1
ftp://ftp.ncbi.nlm.nih.gov/genomes/all/GCA/002/598/925/GCA_002598925.1_ASM259892v1								ftp://ftp.ncbi.nlm.nih.gov/genomes/all/GCF/002/220/655/GCF_002220655.1_ASM222065v1
ftp://ftp.ncbi.nlm.nih.gov/genomes/all/GCA/002/598/945/GCA_002598945.1_ASM259894v1								ftp://ftp.ncbi.nlm.nih.gov/genomes/all/GCF/002/220/675/GCF_002220675.1_ASM222067v1
ftp://ftp.ncbi.nlm.nih.gov/genomes/all/GCA/001/500/395/GCA_001500395.1_ViralProj307710								ftp://ftp.ncbi.nlm.nih.gov/genomes/all/GCF/002/220/695/GCF_002220695.1_ASM222069v1
ftp://ftp.ncbi.nlm.nih.gov/genomes/all/GCA/001/501/055/GCA_001501055.1_ViralProj307711								ftp://ftp.ncbi.nlm.nih.gov/genomes/all/GCF/002/220/715/GCF_002220715.1_ASM222071v1
ftp://ftp.ncbi.nlm.nih.gov/genomes/all/GCA/001/503/815/GCA_001503815.1_ViralProj307826								ftp://ftp.ncbi.nlm.nih.gov/genomes/all/GCF/900/029/885/GCF_900029885.1_Sm_SMB2099
ftp://ftp.ncbi.nlm.nih.gov/genomes/all/GCA/002/602/085/GCA_002602085.1_ASM260208v1								ftp://ftp.ncbi.nlm.nih.gov/genomes/all/GCF/000/953/355/GCF_000953355.1_XNC2
ftp://ftp.ncbi.nlm.nih.gov/genomes/all/GCA/001/482/975/GCA_001482975.1_ViralProj306787								ftp://ftp.ncbi.nlm.nih.gov/genomes/all/GCF/000/597/945/GCF_000597945.1_ASM59794v2
ftp://ftp.ncbi.nlm.nih.gov/genomes/all/GCA/001/503/675/GCA_001503675.1_ViralProj307963								ftp://ftp.ncbi.nlm.nih.gov/genomes/all/GCF/000/834/195/GCF_000834195.1_ASM83419v1
ftp://ftp.ncbi.nlm.nih.gov/genomes/all/GCA/001/504/475/GCA_001504475.1_ViralProj307962								ftp://ftp.ncbi.nlm.nih.gov/genomes/all/GCF/000/834/735/GCF_000834735.1_ASM83473v1
ftp://ftp.ncbi.nlm.nih.gov/genomes/all/GCA/001/505/275/GCA_001505275.1_ViralProj307960								ftp://ftp.ncbi.nlm.nih.gov/genomes/all/GCF/000/968/115/GCF_000968115.1_ASM96811v1
ftp://ftp.ncbi.nlm.nih.gov/genomes/all/GCA/001/505/935/GCA_001505935.1_ViralProj307961								ftp://ftp.ncbi.nlm.nih.gov/genomes/all/GCF/000/987/925/GCF_000987925.1_ASM98792v1
ftp://ftp.ncbi.nlm.nih.gov/genomes/all/GCA/002/605/305/GCA_002605305.1_ASM260530v1								ftp://ftp.ncbi.nlm.nih.gov/genomes/all/GCF/001/304/755/GCF_001304755.1_ASM130475v1
ftp://ftp.ncbi.nlm.nih.gov/genomes/all/GCA/002/756/495/GCA_002756495.1_ASM275649v1								ftp://ftp.ncbi.nlm.nih.gov/genomes/all/GCF/001/305/635/GCF_001305635.1_ASM130563v1
ftp://ftp.ncbi.nlm.nih.gov/genomes/all/GCA/002/605/285/GCA_002605285.1_ASM260528v1								ftp://ftp.ncbi.nlm.nih.gov/genomes/all/GCF/001/708/555/GCF_001708555.1_ASM170855v1
ftp://ftp.ncbi.nlm.nih.gov/genomes/all/GCA/002/756/515/GCA_002756515.1_ASM275651v1								ftp://ftp.ncbi.nlm.nih.gov/genomes/all/GCF/001/708/575/GCF_001708575.1_ASM170857v1
ftp://ftp.ncbi.nlm.nih.gov/genomes/all/GCA/001/292/935/GCA_001292935.1_ViralMultiSegProj295302								ftp://ftp.ncbi.nlm.nih.gov/genomes/all/GCF/001/708/595/GCF_001708595.1_ASM170859v1
ftp://ftp.ncbi.nlm.nih.gov/genomes/all/GCA/001/551/265/GCA_001551265.1_ViralProj310909								ftp://ftp.ncbi.nlm.nih.gov/genomes/all/GCF/001/708/615/GCF_001708615.1_ASM170861v1
ftp://ftp.ncbi.nlm.nih.gov/genomes/all/GCA/001/308/595/GCA_001308595.1_ViralProj295853								ftp://ftp.ncbi.nlm.nih.gov/genomes/all/GCF/001/708/635/GCF_001708635.1_ASM170863v1
ftp://ftp.ncbi.nlm.nih.gov/genomes/all/GCA/001/501/575/GCA_001501575.1_ViralProj307815								ftp://ftp.ncbi.nlm.nih.gov/genomes/all/GCF/001/708/655/GCF_001708655.1_ASM170865v1
ftp://ftp.ncbi.nlm.nih.gov/genomes/all/GCA/001/550/485/GCA_001550485.1_ViralProj310894								ftp://ftp.ncbi.nlm.nih.gov/genomes/all/GCF/000/834/515/GCF_000834515.1_ASM83451v1
ftp://ftp.ncbi.nlm.nih.gov/genomes/all/GCA/002/606/745/GCA_002606745.1_ASM260674v1								ftp://ftp.ncbi.nlm.nih.gov/genomes/all/GCF/000/834/235/GCF_000834235.1_ASM83423v1
ftp://ftp.ncbi.nlm.nih.gov/genomes/all/GCA/001/308/335/GCA_001308335.1_ViralProj298041								ftp://ftp.ncbi.nlm.nih.gov/genomes/all/GCF/000/834/275/GCF_000834275.1_ASM83427v1
ftp://ftp.ncbi.nlm.nih.gov/genomes/all/GCA/001/430/095/GCA_001430095.1_ViralProj299515								ftp://ftp.ncbi.nlm.nih.gov/genomes/all/GCF/000/834/315/GCF_000834315.1_ASM83431v1
ftp://ftp.ncbi.nlm.nih.gov/genomes/all/GCA/002/818/055/GCA_002818055.1_ASM281805v1								ftp://ftp.ncbi.nlm.nih.gov/genomes/all/GCF/000/834/335/GCF_000834335.1_ASM83433v1
ftp://ftp.ncbi.nlm.nih.gov/genomes/all/GCA/001/430/155/GCA_001430155.1_ViralProj300239								ftp://ftp.ncbi.nlm.nih.gov/genomes/all/GCF/000/834/495/GCF_000834495.1_ASM83449v1
ftp://ftp.ncbi.nlm.nih.gov/genomes/all/GCA/001/430/375/GCA_001430375.1_ViralProj300241								ftp://ftp.ncbi.nlm.nih.gov/genomes/all/GCF/000/834/755/GCF_000834755.1_ASM83475v1
ftp://ftp.ncbi.nlm.nih.gov/genomes/all/GCA/001/430/555/GCA_001430555.1_ViralProj300238								ftp://ftp.ncbi.nlm.nih.gov/genomes/all/GCF/000/834/775/GCF_000834775.1_ASM83477v1
ftp://ftp.ncbi.nlm.nih.gov/genomes/all/GCA/001/430/595/GCA_001430595.1_ViralProj300246								ftp://ftp.ncbi.nlm.nih.gov/genomes/all/GCF/000/834/825/GCF_000834825.1_ASM83482v1
ftp://ftp.ncbi.nlm.nih.gov/genomes/all/GCA/001/431/935/GCA_001431935.1_ViralProj301027								ftp://ftp.ncbi.nlm.nih.gov/genomes/all/GCF/000/834/845/GCF_000834845.1_ASM83484v1
ftp://ftp.ncbi.nlm.nih.gov/genomes/all/GCA/001/308/455/GCA_001308455.2_ViralProj297387								ftp://ftp.ncbi.nlm.nih.gov/genomes/all/GCF/000/834/885/GCF_000834885.1_ASM83488v1
ftp://ftp.ncbi.nlm.nih.gov/genomes/all/GCA/001/470/135/GCA_001470135.1_ViralProj306294								ftp://ftp.ncbi.nlm.nih.gov/genomes/all/GCF/000/834/925/GCF_000834925.1_ASM83492v1
ftp://ftp.ncbi.nlm.nih.gov/genomes/all/GCA/001/470/335/GCA_001470335.1_ViralProj306284								ftp://ftp.ncbi.nlm.nih.gov/genomes/all/GCF/000/834/985/GCF_000834985.1_ASM83498v1
ftp://ftp.ncbi.nlm.nih.gov/genomes/all/GCA/001/470/355/GCA_001470355.1_ViralProj306288								ftp://ftp.ncbi.nlm.nih.gov/genomes/all/GCF/001/188/695/GCF_001188695.1_ASM118869v1
ftp://ftp.ncbi.nlm.nih.gov/genomes/all/GCA/001/482/935/GCA_001482935.1_ViralProj306786								ftp://ftp.ncbi.nlm.nih.gov/genomes/all/GCF/001/188/715/GCF_001188715.1_ASM118871v1
ftp://ftp.ncbi.nlm.nih.gov/genomes/all/GCA/001/503/275/GCA_001503275.1_ViralProj307883								ftp://ftp.ncbi.nlm.nih.gov/genomes/all/GCF/001/188/755/GCF_001188755.1_ASM118875v1
ftp://ftp.ncbi.nlm.nih.gov/genomes/all/GCA/001/503/315/GCA_001503315.1_ViralProj307891								ftp://ftp.ncbi.nlm.nih.gov/genomes/all/GCF/001/188/775/GCF_001188775.1_ASM118877v1
ftp://ftp.ncbi.nlm.nih.gov/genomes/all/GCA/001/503/335/GCA_001503335.1_ViralProj307895								ftp://ftp.ncbi.nlm.nih.gov/genomes/all/GCF/001/188/795/GCF_001188795.1_ASM118879v1
ftp://ftp.ncbi.nlm.nih.gov/genomes/all/GCA/001/503/415/GCA_001503415.1_ViralProj307911								ftp://ftp.ncbi.nlm.nih.gov/genomes/all/GCF/001/188/815/GCF_001188815.1_ASM118881v1
ftp://ftp.ncbi.nlm.nih.gov/genomes/all/GCA/001/504/895/GCA_001504895.1_ViralProj307884								ftp://ftp.ncbi.nlm.nih.gov/genomes/all/GCF/001/188/935/GCF_001188935.1_ASM118893v1
ftp://ftp.ncbi.nlm.nih.gov/genomes/all/GCA/001/504/935/GCA_001504935.1_ViralProj307892								ftp://ftp.ncbi.nlm.nih.gov/genomes/all/GCF/001/293/415/GCF_001293415.1_ASM129341v1
ftp://ftp.ncbi.nlm.nih.gov/genomes/all/GCA/001/504/975/GCA_001504975.1_ViralProj307900								ftp://ftp.ncbi.nlm.nih.gov/genomes/all/GCF/001/693/595/GCF_001693595.1_ASM169359v1
ftp://ftp.ncbi.nlm.nih.gov/genomes/all/GCA/001/505/575/GCA_001505575.1_ViralProj307889								ftp://ftp.ncbi.nlm.nih.gov/genomes/all/GCF/000/750/315/GCF_000750315.1_ASM75031v1
ftp://ftp.ncbi.nlm.nih.gov/genomes/all/GCA/001/470/675/GCA_001470675.1_ViralProj306293								ftp://ftp.ncbi.nlm.nih.gov/genomes/all/GCF/000/834/295/GCF_000834295.1_ASM83429v1
ftp://ftp.ncbi.nlm.nih.gov/genomes/all/GCA/001/470/915/GCA_001470915.1_ViralProj306295								ftp://ftp.ncbi.nlm.nih.gov/genomes/all/GCF/000/834/355/GCF_000834355.1_ASM83435v1
ftp://ftp.ncbi.nlm.nih.gov/genomes/all/GCA/001/501/935/GCA_001501935.1_ViralProj307732								ftp://ftp.ncbi.nlm.nih.gov/genomes/all/GCF/000/834/375/GCF_000834375.1_ASM83437v1
ftp://ftp.ncbi.nlm.nih.gov/genomes/all/GCA/001/502/555/GCA_001502555.1_ViralProj307733								ftp://ftp.ncbi.nlm.nih.gov/genomes/all/GCF/000/834/415/GCF_000834415.1_ASM83441v1
ftp://ftp.ncbi.nlm.nih.gov/genomes/all/GCA/002/149/305/GCA_002149305.1_ViralProj266637.15								ftp://ftp.ncbi.nlm.nih.gov/genomes/all/GCF/000/834/435/GCF_000834435.1_ASM83443v1
ftp://ftp.ncbi.nlm.nih.gov/genomes/all/GCA/002/149/385/GCA_002149385.1_ViralProj266637.14								ftp://ftp.ncbi.nlm.nih.gov/genomes/all/GCF/000/834/475/GCF_000834475.1_ASM83447v1
ftp://ftp.ncbi.nlm.nih.gov/genomes/all/GCA/002/149/765/GCA_002149765.1_ViralProj308018.1								ftp://ftp.ncbi.nlm.nih.gov/genomes/all/GCF/000/834/945/GCF_000834945.1_ASM83494v1
ftp://ftp.ncbi.nlm.nih.gov/genomes/all/GCA/002/607/365/GCA_002607365.1_ASM260736v1								ftp://ftp.ncbi.nlm.nih.gov/genomes/all/GCF/900/092/345/GCF_900092345.1_YP4713
ftp://ftp.ncbi.nlm.nih.gov/genomes/all/GCA/002/607/385/GCA_002607385.1_ASM260738v1								ftp://ftp.ncbi.nlm.nih.gov/genomes/all/GCF/001/011/055/GCF_001011055.1_ASM101105v1
ftp://ftp.ncbi.nlm.nih.gov/genomes/all/GCA/002/622/425/GCA_002622425.1_ASM262242v1								ftp://ftp.ncbi.nlm.nih.gov/genomes/all/GCF/002/504/285/GCF_002504285.1_ASM250428v1
ftp://ftp.ncbi.nlm.nih.gov/genomes/all/GCA/002/756/975/GCA_002756975.1_ASM275697v1								ftp://ftp.ncbi.nlm.nih.gov/genomes/all/GCF/000/612/075/GCF_000612075.2_ASM61207v2
ftp://ftp.ncbi.nlm.nih.gov/genomes/all/GCA/002/605/925/GCA_002605925.1_ASM260592v1								ftp://ftp.ncbi.nlm.nih.gov/genomes/all/GCF/000/633/175/GCF_000633175.1_ASM63317v1
ftp://ftp.ncbi.nlm.nih.gov/genomes/all/GCA/002/603/405/GCA_002603405.1_ASM260340v1								ftp://ftp.ncbi.nlm.nih.gov/genomes/all/GCF/000/635/955/GCF_000635955.1_ASM63595v1
ftp://ftp.ncbi.nlm.nih.gov/genomes/all/GCA/002/598/625/GCA_002598625.1_ASM259862v1								ftp://ftp.ncbi.nlm.nih.gov/genomes/all/GCF/000/819/505/GCF_000819505.1_ASM81950v1
ftp://ftp.ncbi.nlm.nih.gov/genomes/all/GCA/002/598/645/GCA_002598645.1_ASM259864v1								ftp://ftp.ncbi.nlm.nih.gov/genomes/all/GCF/000/940/915/GCF_000940915.1_ASM94091v1
ftp://ftp.ncbi.nlm.nih.gov/genomes/all/GCA/002/756/835/GCA_002756835.1_ASM275683v1								ftp://ftp.ncbi.nlm.nih.gov/genomes/all/GCF/000/963/645/GCF_000963645.1_ASM96364v1
ftp://ftp.ncbi.nlm.nih.gov/genomes/all/GCA/002/756/955/GCA_002756955.1_ASM275695v1								ftp://ftp.ncbi.nlm.nih.gov/genomes/all/GCF/001/019/645/GCF_001019645.1_ASM101964v1
ftp://ftp.ncbi.nlm.nih.gov/genomes/all/GCA/002/757/015/GCA_002757015.1_ASM275701v1								ftp://ftp.ncbi.nlm.nih.gov/genomes/all/GCF/001/455/365/GCF_001455365.1_ASM145536v1
ftp://ftp.ncbi.nlm.nih.gov/genomes/all/GCA/002/756/855/GCA_002756855.1_ASM275685v1								ftp://ftp.ncbi.nlm.nih.gov/genomes/all/GCF/001/518/775/GCF_001518775.1_ASM151877v1
ftp://ftp.ncbi.nlm.nih.gov/genomes/all/GCA/001/447/065/GCA_001447065.1_ViralProj302553								ftp://ftp.ncbi.nlm.nih.gov/genomes/all/GCF/001/683/535/GCF_001683535.1_ASM168353v1
ftp://ftp.ncbi.nlm.nih.gov/genomes/all/GCA/001/504/115/GCA_001504115.1_ViralProj307890								ftp://ftp.ncbi.nlm.nih.gov/genomes/all/GCF/001/687/125/GCF_001687125.1_ASM168712v1
ftp://ftp.ncbi.nlm.nih.gov/genomes/all/GCA/001/505/555/GCA_001505555.1_ViralProj307885								ftp://ftp.ncbi.nlm.nih.gov/genomes/all/GCF/002/214/245/GCF_002214245.1_ASM221424v1
ftp://ftp.ncbi.nlm.nih.gov/genomes/all/GCA/001/550/865/GCA_001550865.1_ViralProj310895								ftp://ftp.ncbi.nlm.nih.gov/genomes/all/GCF/002/214/265/GCF_002214265.1_ASM221426v1
ftp://ftp.ncbi.nlm.nih.gov/genomes/all/GCA/002/606/765/GCA_002606765.1_ASM260676v1								ftp://ftp.ncbi.nlm.nih.gov/genomes/all/GCF/002/214/305/GCF_002214305.1_ASM221430v1
ftp://ftp.ncbi.nlm.nih.gov/genomes/all/GCA/002/622/525/GCA_002622525.1_ASM262252v1								ftp://ftp.ncbi.nlm.nih.gov/genomes/all/GCF/002/313/065/GCF_002313065.1_ASM231306v1
ftp://ftp.ncbi.nlm.nih.gov/genomes/all/GCA/002/594/685/GCA_002594685.1_ASM259468v1								ftp://ftp.ncbi.nlm.nih.gov/genomes/all/GCF/002/735/225/GCF_002735225.1_ASM273522v1
ftp://ftp.ncbi.nlm.nih.gov/genomes/all/GCA/002/594/705/GCA_002594705.1_ASM259470v1								ftp://ftp.ncbi.nlm.nih.gov/genomes/all/GCF/002/764/135/GCF_002764135.1_ASM276413v1
ftp://ftp.ncbi.nlm.nih.gov/genomes/all/GCA/002/594/725/GCA_002594725.1_ASM259472v1								ftp://ftp.ncbi.nlm.nih.gov/genomes/all/GCF/000/783/775/GCF_000783775.2_ASM78377v2
ftp://ftp.ncbi.nlm.nih.gov/genomes/all/GCA/002/594/745/GCA_002594745.1_ASM259474v1								ftp://ftp.ncbi.nlm.nih.gov/genomes/all/GCF/000/287/215/GCF_000287215.2_ASM28721v3
ftp://ftp.ncbi.nlm.nih.gov/genomes/all/GCA/002/594/765/GCA_002594765.1_ASM259476v1								ftp://ftp.ncbi.nlm.nih.gov/genomes/all/GCF/001/447/335/GCF_001447335.1_ASM144733v1
ftp://ftp.ncbi.nlm.nih.gov/genomes/all/GCA/002/594/785/GCA_002594785.1_ASM259478v1								ftp://ftp.ncbi.nlm.nih.gov/genomes/all/GCF/001/593/245/GCF_001593245.1_ASM159324v1
ftp://ftp.ncbi.nlm.nih.gov/genomes/all/GCA/002/603/505/GCA_002603505.1_ASM260350v1								ftp://ftp.ncbi.nlm.nih.gov/genomes/all/GCF/001/634/325/GCF_001634325.1_ASM163432v1
ftp://ftp.ncbi.nlm.nih.gov/genomes/all/GCA/002/594/805/GCA_002594805.1_ASM259480v1								ftp://ftp.ncbi.nlm.nih.gov/genomes/all/GCF/002/803/925/GCF_002803925.1_ASM280392v1
ftp://ftp.ncbi.nlm.nih.gov/genomes/all/GCA/002/594/825/GCA_002594825.1_ASM259482v1								ftp://ftp.ncbi.nlm.nih.gov/genomes/all/GCF/002/803/945/GCF_002803945.1_ASM280394v1
ftp://ftp.ncbi.nlm.nih.gov/genomes/all/GCA/002/630/465/GCA_002630465.1_ASM263046v1								ftp://ftp.ncbi.nlm.nih.gov/genomes/all/GCF/001/469/735/GCF_001469735.1_ASM146973v1
ftp://ftp.ncbi.nlm.nih.gov/genomes/all/GCA/002/594/845/GCA_002594845.1_ASM259484v1								ftp://ftp.ncbi.nlm.nih.gov/genomes/all/GCF/001/679/745/GCF_001679745.1_ASM167974v1
ftp://ftp.ncbi.nlm.nih.gov/genomes/all/GCA/002/594/865/GCA_002594865.1_ASM259486v1								ftp://ftp.ncbi.nlm.nih.gov/genomes/all/GCF/002/119/505/GCF_002119505.1_ASM211950v1
ftp://ftp.ncbi.nlm.nih.gov/genomes/all/GCA/002/594/885/GCA_002594885.1_ASM259488v1								ftp://ftp.ncbi.nlm.nih.gov/genomes/all/GCF/002/119/525/GCF_002119525.1_ASM211952v1
ftp://ftp.ncbi.nlm.nih.gov/genomes/all/GCA/002/594/905/GCA_002594905.1_ASM259490v1								ftp://ftp.ncbi.nlm.nih.gov/genomes/all/GCF/002/119/545/GCF_002119545.1_ASM211954v1
ftp://ftp.ncbi.nlm.nih.gov/genomes/all/GCA/002/594/925/GCA_002594925.1_ASM259492v1								ftp://ftp.ncbi.nlm.nih.gov/genomes/all/GCF/002/119/565/GCF_002119565.1_ASM211956v1
ftp://ftp.ncbi.nlm.nih.gov/genomes/all/GCA/002/594/945/GCA_002594945.1_ASM259494v1								ftp://ftp.ncbi.nlm.nih.gov/genomes/all/GCF/002/119/585/GCF_002119585.1_ASM211958v1
ftp://ftp.ncbi.nlm.nih.gov/genomes/all/GCA/002/594/965/GCA_002594965.1_ASM259496v1								ftp://ftp.ncbi.nlm.nih.gov/genomes/all/GCF/002/149/065/GCF_002149065.1_ASM214906v1
ftp://ftp.ncbi.nlm.nih.gov/genomes/all/GCA/002/594/985/GCA_002594985.1_ASM259498v1								ftp://ftp.ncbi.nlm.nih.gov/genomes/all/GCF/002/149/085/GCF_002149085.1_ASM214908v1
ftp://ftp.ncbi.nlm.nih.gov/genomes/all/GCA/002/595/005/GCA_002595005.1_ASM259500v1								ftp://ftp.ncbi.nlm.nih.gov/genomes/all/GCF/002/149/105/GCF_002149105.1_ASM214910v1
ftp://ftp.ncbi.nlm.nih.gov/genomes/all/GCA/002/595/025/GCA_002595025.1_ASM259502v1								ftp://ftp.ncbi.nlm.nih.gov/genomes/all/GCF/000/765/415/GCF_000765415.1_ASM76541v1
ftp://ftp.ncbi.nlm.nih.gov/genomes/all/GCA/002/595/045/GCA_002595045.1_ASM259504v1								ftp://ftp.ncbi.nlm.nih.gov/genomes/all/GCF/000/788/715/GCF_000788715.2_ASM78871v2
ftp://ftp.ncbi.nlm.nih.gov/genomes/all/GCA/001/433/565/GCA_001433565.1_ViralMultiSegProj301069								ftp://ftp.ncbi.nlm.nih.gov/genomes/all/GCF/000/829/215/GCF_000829215.1_ASM82921v1
ftp://ftp.ncbi.nlm.nih.gov/genomes/all/GCA/001/654/265/GCA_001654265.1_ViralMultiSegProj323862								ftp://ftp.ncbi.nlm.nih.gov/genomes/all/GCF/000/963/555/GCF_000963555.1_ASM96355v1
ftp://ftp.ncbi.nlm.nih.gov/genomes/all/GCA/001/433/645/GCA_001433645.1_ViralProj301070								ftp://ftp.ncbi.nlm.nih.gov/genomes/all/GCF/000/969/235/GCF_000969235.1_ASM96923v1
ftp://ftp.ncbi.nlm.nih.gov/genomes/all/GCA/001/447/045/GCA_001447045.1_ViralProj302552								ftp://ftp.ncbi.nlm.nih.gov/genomes/all/GCF/000/969/265/GCF_000969265.1_ASM96926v1
ftp://ftp.ncbi.nlm.nih.gov/genomes/all/GCA/001/500/835/GCA_001500835.1_ViralProj307798								ftp://ftp.ncbi.nlm.nih.gov/genomes/all/GCF/001/250/235/GCF_001250235.2_5174_7_8_v2
ftp://ftp.ncbi.nlm.nih.gov/genomes/all/GCA/001/502/875/GCA_001502875.1_ViralProj307797								ftp://ftp.ncbi.nlm.nih.gov/genomes/all/GCF/001/318/185/GCF_001318185.1_ASM131818v1
ftp://ftp.ncbi.nlm.nih.gov/genomes/all/GCA/001/503/855/GCA_001503855.1_ViralProj307834								ftp://ftp.ncbi.nlm.nih.gov/genomes/all/GCF/001/683/415/GCF_001683415.1_ASM168341v1
ftp://ftp.ncbi.nlm.nih.gov/genomes/all/GCA/002/606/785/GCA_002606785.1_ASM260678v1								ftp://ftp.ncbi.nlm.nih.gov/genomes/all/GCF/001/854/425/GCF_001854425.1_ASM185442v1
ftp://ftp.ncbi.nlm.nih.gov/genomes/all/GCA/001/470/575/GCA_001470575.1_ViralProj306050								ftp://ftp.ncbi.nlm.nih.gov/genomes/all/GCF/001/887/395/GCF_001887395.1_ASM188739v1
ftp://ftp.ncbi.nlm.nih.gov/genomes/all/GCA/001/500/815/GCA_001500815.1_ViralProj307794								ftp://ftp.ncbi.nlm.nih.gov/genomes/all/GCF/001/887/415/GCF_001887415.1_ASM188741v1
ftp://ftp.ncbi.nlm.nih.gov/genomes/all/GCA/001/501/475/GCA_001501475.1_ViralProj307795								ftp://ftp.ncbi.nlm.nih.gov/genomes/all/GCF/001/887/435/GCF_001887435.1_ASM188743v1
ftp://ftp.ncbi.nlm.nih.gov/genomes/all/GCA/001/502/235/GCA_001502235.1_ViralProj307792								ftp://ftp.ncbi.nlm.nih.gov/genomes/all/GCF/001/887/455/GCF_001887455.1_ASM188745v1
ftp://ftp.ncbi.nlm.nih.gov/genomes/all/GCA/001/502/255/GCA_001502255.1_ViralProj307796								ftp://ftp.ncbi.nlm.nih.gov/genomes/all/GCF/001/887/475/GCF_001887475.1_ASM188747v1
ftp://ftp.ncbi.nlm.nih.gov/genomes/all/GCA/001/502/855/GCA_001502855.1_ViralProj307793								ftp://ftp.ncbi.nlm.nih.gov/genomes/all/GCF/001/887/495/GCF_001887495.1_ASM188749v1
ftp://ftp.ncbi.nlm.nih.gov/genomes/all/GCA/001/551/185/GCA_001551185.1_ViralProj310893								ftp://ftp.ncbi.nlm.nih.gov/genomes/all/GCF/001/887/515/GCF_001887515.1_ASM188751v1
ftp://ftp.ncbi.nlm.nih.gov/genomes/all/GCA/001/579/495/GCA_001579495.1_ViralProj313551								ftp://ftp.ncbi.nlm.nih.gov/genomes/all/GCF/001/887/615/GCF_001887615.1_ASM188761v1
ftp://ftp.ncbi.nlm.nih.gov/genomes/all/GCA/002/660/615/GCA_002660615.1_ASM266061v1								ftp://ftp.ncbi.nlm.nih.gov/genomes/all/GCF/001/887/635/GCF_001887635.1_ASM188763v1
ftp://ftp.ncbi.nlm.nih.gov/genomes/all/GCA/001/501/495/GCA_001501495.1_ViralProj307799								ftp://ftp.ncbi.nlm.nih.gov/genomes/all/GCF/001/887/655/GCF_001887655.1_ASM188765v1
ftp://ftp.ncbi.nlm.nih.gov/genomes/all/GCA/001/502/275/GCA_001502275.1_ViralProj307800								ftp://ftp.ncbi.nlm.nih.gov/genomes/all/GCF/002/073/335/GCF_002073335.1_ASM207333v1
ftp://ftp.ncbi.nlm.nih.gov/genomes/all/GCA/002/601/885/GCA_002601885.1_ASM260188v1								ftp://ftp.ncbi.nlm.nih.gov/genomes/all/GCF/002/313/025/GCF_002313025.1_ASM231302v1
ftp://ftp.ncbi.nlm.nih.gov/genomes/all/GCA/001/310/215/GCA_001310215.1_ViralProj298247								ftp://ftp.ncbi.nlm.nih.gov/genomes/all/GCF/002/749/635/GCF_002749635.1_ASM274963v1
ftp://ftp.ncbi.nlm.nih.gov/genomes/all/GCA/002/607/125/GCA_002607125.1_ASM260712v1								ftp://ftp.ncbi.nlm.nih.gov/genomes/all/GCF/002/892/855/GCF_002892855.1_ASM289285v1
ftp://ftp.ncbi.nlm.nih.gov/genomes/all/GCA/001/504/595/GCA_001504595.1_ViralProj308020								ftp://ftp.ncbi.nlm.nih.gov/genomes/all/GCF/900/185/995/GCF_900185995.1_BK1071
ftp://ftp.ncbi.nlm.nih.gov/genomes/all/GCA/001/399/245/GCA_001399245.1_ViralProj298907								ftp://ftp.ncbi.nlm.nih.gov/genomes/all/GCF/000/770/115/GCF_000770115.1_ASM77011v2
ftp://ftp.ncbi.nlm.nih.gov/genomes/all/GCA/001/503/295/GCA_001503295.1_ViralProj307887								ftp://ftp.ncbi.nlm.nih.gov/genomes/all/GCF/001/908/435/GCF_001908435.2_ASM190843v2
ftp://ftp.ncbi.nlm.nih.gov/genomes/all/GCA/001/504/075/GCA_001504075.1_ViralProj307882								ftp://ftp.ncbi.nlm.nih.gov/genomes/all/GCF/002/850/295/GCF_002850295.1_ASM285029v1
ftp://ftp.ncbi.nlm.nih.gov/genomes/all/GCA/001/504/095/GCA_001504095.1_ViralProj307886								ftp://ftp.ncbi.nlm.nih.gov/genomes/all/GCF/000/568/495/GCF_000568495.1_ASM56849v1
ftp://ftp.ncbi.nlm.nih.gov/genomes/all/GCA/001/504/915/GCA_001504915.1_ViralProj307888								ftp://ftp.ncbi.nlm.nih.gov/genomes/all/GCF/001/188/185/GCF_001188185.2_ASM118818v2
ftp://ftp.ncbi.nlm.nih.gov/genomes/all/GCA/001/505/535/GCA_001505535.1_ViralProj307881								ftp://ftp.ncbi.nlm.nih.gov/genomes/all/GCF/001/244/315/GCF_001244315.1_ASM124431v1
ftp://ftp.ncbi.nlm.nih.gov/genomes/all/GCA/001/551/345/GCA_001551345.1_ViralProj310925								ftp://ftp.ncbi.nlm.nih.gov/genomes/all/GCF/001/304/775/GCF_001304775.1_ASM130477v1
ftp://ftp.ncbi.nlm.nih.gov/genomes/all/GCA/002/607/505/GCA_002607505.1_ASM260750v1								ftp://ftp.ncbi.nlm.nih.gov/genomes/all/GCF/001/433/415/GCF_001433415.1_ASM143341v1
ftp://ftp.ncbi.nlm.nih.gov/genomes/all/GCA/002/600/305/GCA_002600305.1_ASM260030v1								ftp://ftp.ncbi.nlm.nih.gov/genomes/all/GCF/001/636/035/GCF_001636035.1_ASM163603v1
ftp://ftp.ncbi.nlm.nih.gov/genomes/all/GCA/002/597/985/GCA_002597985.1_ASM259798v1								ftp://ftp.ncbi.nlm.nih.gov/genomes/all/GCF/001/682/175/GCF_001682175.1_ASM168217v1
ftp://ftp.ncbi.nlm.nih.gov/genomes/all/GCA/001/399/225/GCA_001399225.1_ViralProj298991								ftp://ftp.ncbi.nlm.nih.gov/genomes/all/GCF/001/700/835/GCF_001700835.1_ASM170083v1
ftp://ftp.ncbi.nlm.nih.gov/genomes/all/GCA/001/399/265/GCA_001399265.1_ViralProj298990								ftp://ftp.ncbi.nlm.nih.gov/genomes/all/GCF/001/758/605/GCF_001758605.1_ASM175860v1
ftp://ftp.ncbi.nlm.nih.gov/genomes/all/GCA/001/399/285/GCA_001399285.1_ViralProj298920								ftp://ftp.ncbi.nlm.nih.gov/genomes/all/GCF/001/879/585/GCF_001879585.1_ASM187958v1
ftp://ftp.ncbi.nlm.nih.gov/genomes/all/GCA/002/667/175/GCA_002667175.1_ASM266717v1								ftp://ftp.ncbi.nlm.nih.gov/genomes/all/GCF/001/887/055/GCF_001887055.1_ASM188705v1
ftp://ftp.ncbi.nlm.nih.gov/genomes/all/GCA/002/673/335/GCA_002673335.1_ASM267333v1								ftp://ftp.ncbi.nlm.nih.gov/genomes/all/GCF/002/073/775/GCF_002073775.1_ASM207377v1
ftp://ftp.ncbi.nlm.nih.gov/genomes/all/GCA/001/470/455/GCA_001470455.1_ViralProj306344								ftp://ftp.ncbi.nlm.nih.gov/genomes/all/GCF/002/209/725/GCF_002209725.2_ASM220972v2
ftp://ftp.ncbi.nlm.nih.gov/genomes/all/GCA/002/646/315/GCA_002646315.1_ASM264631v1								ftp://ftp.ncbi.nlm.nih.gov/genomes/all/GCF/002/220/985/GCF_002220985.2_HGAP
ftp://ftp.ncbi.nlm.nih.gov/genomes/all/GCA/002/646/375/GCA_002646375.1_ASM264637v1								ftp://ftp.ncbi.nlm.nih.gov/genomes/all/GCF/000/746/665/GCF_000746665.1_ASM74666v1
ftp://ftp.ncbi.nlm.nih.gov/genomes/all/GCA/002/646/475/GCA_002646475.1_ASM264647v1								ftp://ftp.ncbi.nlm.nih.gov/genomes/all/GCF/001/433/435/GCF_001433435.1_ASM143343v1
ftp://ftp.ncbi.nlm.nih.gov/genomes/all/GCA/002/646/515/GCA_002646515.1_ASM264651v1								ftp://ftp.ncbi.nlm.nih.gov/genomes/all/GCF/001/653/775/GCF_001653775.1_ASM165377v1
ftp://ftp.ncbi.nlm.nih.gov/genomes/all/GCA/002/646/715/GCA_002646715.1_ASM264671v1								ftp://ftp.ncbi.nlm.nih.gov/genomes/all/GCF/001/675/245/GCF_001675245.1_ASM167524v1
ftp://ftp.ncbi.nlm.nih.gov/genomes/all/GCA/002/646/755/GCA_002646755.1_ASM264675v1								ftp://ftp.ncbi.nlm.nih.gov/genomes/all/GCF/002/117/205/GCF_002117205.1_ASM211720v1
ftp://ftp.ncbi.nlm.nih.gov/genomes/all/GCA/002/646/775/GCA_002646775.1_ASM264677v1								ftp://ftp.ncbi.nlm.nih.gov/genomes/all/GCF/002/204/915/GCF_002204915.1_ASM220491v1
ftp://ftp.ncbi.nlm.nih.gov/genomes/all/GCA/002/646/815/GCA_002646815.1_ASM264681v1								ftp://ftp.ncbi.nlm.nih.gov/genomes/all/GCF/002/215/135/GCF_002215135.1_ASM221513v1
ftp://ftp.ncbi.nlm.nih.gov/genomes/all/GCA/002/646/835/GCA_002646835.1_ASM264683v1								ftp://ftp.ncbi.nlm.nih.gov/genomes/all/GCF/002/224/265/GCF_002224265.1_ASM222426v1
ftp://ftp.ncbi.nlm.nih.gov/genomes/all/GCA/001/503/255/GCA_001503255.1_ViralProj307879								ftp://ftp.ncbi.nlm.nih.gov/genomes/all/GCF/002/850/455/GCF_002850455.1_ASM285045v1
ftp://ftp.ncbi.nlm.nih.gov/genomes/all/GCA/001/504/055/GCA_001504055.1_ViralProj307878								ftp://ftp.ncbi.nlm.nih.gov/genomes/all/GCF/002/863/725/GCF_002863725.1_ASM286372v1
ftp://ftp.ncbi.nlm.nih.gov/genomes/all/GCA/001/504/855/GCA_001504855.1_ViralProj307876								ftp://ftp.ncbi.nlm.nih.gov/genomes/all/GCF/001/767/355/GCF_001767355.1_ASM176735v1
ftp://ftp.ncbi.nlm.nih.gov/genomes/all/GCA/001/504/875/GCA_001504875.1_ViralProj307880								ftp://ftp.ncbi.nlm.nih.gov/genomes/all/GCF/001/952/955/GCF_001952955.1_ASM195295v1
ftp://ftp.ncbi.nlm.nih.gov/genomes/all/GCA/001/505/515/GCA_001505515.1_ViralProj307877								ftp://ftp.ncbi.nlm.nih.gov/genomes/all/GCF/001/969/325/GCF_001969325.1_ASM196932v1
ftp://ftp.ncbi.nlm.nih.gov/genomes/all/GCA/002/820/465/GCA_002820465.1_ASM282046v1								ftp://ftp.ncbi.nlm.nih.gov/genomes/all/GCF/002/140/055/GCF_002140055.1_ASM214005v1
ftp://ftp.ncbi.nlm.nih.gov/genomes/all/GCA/002/820/445/GCA_002820445.1_ASM282044v1								ftp://ftp.ncbi.nlm.nih.gov/genomes/all/GCF/002/142/655/GCF_002142655.1_ASM214265v1
ftp://ftp.ncbi.nlm.nih.gov/genomes/all/GCA/001/500/855/GCA_001500855.1_ViralProj307802								ftp://ftp.ncbi.nlm.nih.gov/genomes/all/GCF/002/163/755/GCF_002163755.1_ASM216375v1
ftp://ftp.ncbi.nlm.nih.gov/genomes/all/GCA/001/502/895/GCA_001502895.1_ViralProj307801								ftp://ftp.ncbi.nlm.nih.gov/genomes/all/GCF/002/906/455/GCF_002906455.1_ASM290645v1
ftp://ftp.ncbi.nlm.nih.gov/genomes/all/GCA/001/430/035/GCA_001430035.1_ViralProj300256								ftp://ftp.ncbi.nlm.nih.gov/genomes/all/GCF/002/906/475/GCF_002906475.1_ASM290647v1
ftp://ftp.ncbi.nlm.nih.gov/genomes/all/GCA/001/430/255/GCA_001430255.1_ViralProj300259								ftp://ftp.ncbi.nlm.nih.gov/genomes/all/GCF/002/196/515/GCF_002196515.1_ASM219651v1
ftp://ftp.ncbi.nlm.nih.gov/genomes/all/GCA/001/430/455/GCA_001430455.1_ViralProj300257								ftp://ftp.ncbi.nlm.nih.gov/genomes/all/GCF/001/456/255/GCF_001456255.1_ASM145625v1
ftp://ftp.ncbi.nlm.nih.gov/genomes/all/GCA/001/430/655/GCA_001430655.1_ViralProj300258								ftp://ftp.ncbi.nlm.nih.gov/genomes/all/GCF/001/680/025/GCF_001680025.1_ASM168002v1
ftp://ftp.ncbi.nlm.nih.gov/genomes/all/GCA/001/430/175/GCA_001430175.1_ViralProj300243								ftp://ftp.ncbi.nlm.nih.gov/genomes/all/GCF/001/680/045/GCF_001680045.1_ASM168004v1
ftp://ftp.ncbi.nlm.nih.gov/genomes/all/GCA/001/430/575/GCA_001430575.1_ViralProj300242								ftp://ftp.ncbi.nlm.nih.gov/genomes/all/GCF/001/680/065/GCF_001680065.1_ASM168006v1
ftp://ftp.ncbi.nlm.nih.gov/genomes/all/GCA/002/655/095/GCA_002655095.1_ASM265509v1								ftp://ftp.ncbi.nlm.nih.gov/genomes/all/GCF/001/680/085/GCF_001680085.1_ASM168008v1
ftp://ftp.ncbi.nlm.nih.gov/genomes/all/GCA/002/655/115/GCA_002655115.1_ASM265511v1								ftp://ftp.ncbi.nlm.nih.gov/genomes/all/GCF/900/087/055/GCF_900087055.1_31289_E01
ftp://ftp.ncbi.nlm.nih.gov/genomes/all/GCA/001/470/035/GCA_001470035.1_ViralProj306230								ftp://ftp.ncbi.nlm.nih.gov/genomes/all/GCF/000/163/615/GCF_000163615.3_ASM16361v3
ftp://ftp.ncbi.nlm.nih.gov/genomes/all/GCA/001/470/195/GCA_001470195.1_ViralProj306342								ftp://ftp.ncbi.nlm.nih.gov/genomes/all/GCF/000/604/045/GCF_000604045.1_ASM60404v1
ftp://ftp.ncbi.nlm.nih.gov/genomes/all/GCA/001/470/975/GCA_001470975.1_ViralProj306343								ftp://ftp.ncbi.nlm.nih.gov/genomes/all/GCF/001/594/245/GCF_001594245.1_ASM159424v1
ftp://ftp.ncbi.nlm.nih.gov/genomes/all/GCA/001/500/795/GCA_001500795.1_ViralProj307790								ftp://ftp.ncbi.nlm.nih.gov/genomes/all/GCF/001/594/265/GCF_001594265.1_ASM159426v1
ftp://ftp.ncbi.nlm.nih.gov/genomes/all/GCA/002/605/685/GCA_002605685.1_ASM260568v1								ftp://ftp.ncbi.nlm.nih.gov/genomes/all/GCF/001/690/155/GCF_001690155.1_ASM169015v1
ftp://ftp.ncbi.nlm.nih.gov/genomes/all/GCA/002/607/405/GCA_002607405.1_ASM260740v1								ftp://ftp.ncbi.nlm.nih.gov/genomes/all/GCF/001/460/855/GCF_001460855.1_MIDG2331
[truncated: 4,479 more rows]

## Sheet: evaluation set - Marine
Marine prokaryotic genomes FTP adress				Marine viral genomes HTML adress
ftp:://ftp.patricbrc.org/genomes/1125964.2/				https://www.ncbi.nlm.nih.gov/nuccore/357542004
ftp:://ftp.patricbrc.org/genomes/1295392.4/				https://www.ncbi.nlm.nih.gov/nuccore/377581228
ftp:://ftp.patricbrc.org/genomes/1581149.3/				https://www.ncbi.nlm.nih.gov/nuccore/388548556
ftp:://ftp.patricbrc.org/genomes/1618204.4/				https://www.ncbi.nlm.nih.gov/nuccore/388548805
ftp:://ftp.patricbrc.org/genomes/1642818.3/				https://www.ncbi.nlm.nih.gov/nuccore/388549309
ftp:://ftp.patricbrc.org/genomes/1737063.3/				https://www.ncbi.nlm.nih.gov/nuccore/451988496
ftp:://ftp.patricbrc.org/genomes/1740263.3/				https://www.ncbi.nlm.nih.gov/nuccore/451988821
ftp:://ftp.patricbrc.org/genomes/174633.29/				https://www.ncbi.nlm.nih.gov/nuccore/451989038
ftp:://ftp.patricbrc.org/genomes/1750590.3/				https://www.ncbi.nlm.nih.gov/nuccore/459348686
ftp:://ftp.patricbrc.org/genomes/1778481.3/				https://www.ncbi.nlm.nih.gov/nuccore/460109153
ftp:://ftp.patricbrc.org/genomes/1821260.3/				https://www.ncbi.nlm.nih.gov/nuccore/468639686
ftp:://ftp.patricbrc.org/genomes/1829.39/				https://www.ncbi.nlm.nih.gov/nuccore/469519959
ftp:://ftp.patricbrc.org/genomes/1862707.3/				https://www.ncbi.nlm.nih.gov/nuccore/469520645
ftp:://ftp.patricbrc.org/genomes/1869227.61/				https://www.ncbi.nlm.nih.gov/nuccore/510134770
ftp:://ftp.patricbrc.org/genomes/1869227.62/				https://www.ncbi.nlm.nih.gov/nuccore/GU071098.1
ftp:://ftp.patricbrc.org/genomes/1869227.63/				https://www.ncbi.nlm.nih.gov/nuccore/GU071100.1
ftp:://ftp.patricbrc.org/genomes/1872076.7/				https://www.ncbi.nlm.nih.gov/nuccore/HQ316584.1
ftp:://ftp.patricbrc.org/genomes/189382.11/				https://www.ncbi.nlm.nih.gov/nuccore/HQ317290.1
ftp:://ftp.patricbrc.org/genomes/1897630.3/				https://www.ncbi.nlm.nih.gov/nuccore/HQ317291.1
ftp:://ftp.patricbrc.org/genomes/1897632.3/				https://www.ncbi.nlm.nih.gov/nuccore/HQ317292.1
ftp:://ftp.patricbrc.org/genomes/1897634.3/				https://www.ncbi.nlm.nih.gov/nuccore/HQ317385.1
ftp:://ftp.patricbrc.org/genomes/1898104.77/				https://www.ncbi.nlm.nih.gov/nuccore/HQ632825.1
ftp:://ftp.patricbrc.org/genomes/1898104.78/				https://www.ncbi.nlm.nih.gov/nuccore/HQ632855.1
ftp:://ftp.patricbrc.org/genomes/1898111.1/				https://www.ncbi.nlm.nih.gov/nuccore/HQ632860.1
ftp:://ftp.patricbrc.org/genomes/1898111.11/				https://www.ncbi.nlm.nih.gov/nuccore/HQ633061.1
ftp:://ftp.patricbrc.org/genomes/1898111.8/				https://www.ncbi.nlm.nih.gov/nuccore/HQ633072.1
ftp:://ftp.patricbrc.org/genomes/1898111.9/				https://www.ncbi.nlm.nih.gov/nuccore/HQ634144.1
ftp:://ftp.patricbrc.org/genomes/1904441.52/				https://www.ncbi.nlm.nih.gov/nuccore/HQ634147.1
ftp:://ftp.patricbrc.org/genomes/1913988.54/				https://www.ncbi.nlm.nih.gov/nuccore/HQ634152.1
ftp:://ftp.patricbrc.org/genomes/1913988.55/				https://www.ncbi.nlm.nih.gov/nuccore/HQ634176.1
ftp:://ftp.patricbrc.org/genomes/1913989.307/				https://www.ncbi.nlm.nih.gov/nuccore/HQ634189.1
ftp:://ftp.patricbrc.org/genomes/1913989.308/				https://www.ncbi.nlm.nih.gov/nuccore/HQ634190.1
ftp:://ftp.patricbrc.org/genomes/192421.6/				https://www.ncbi.nlm.nih.gov/nuccore/HQ634191.1
ftp:://ftp.patricbrc.org/genomes/1925763.3/				https://www.ncbi.nlm.nih.gov/nuccore/JF974289.1
ftp:://ftp.patricbrc.org/genomes/1977320.3/				https://www.ncbi.nlm.nih.gov/nuccore/JF974292.1
ftp:://ftp.patricbrc.org/genomes/1978231.1/				https://www.ncbi.nlm.nih.gov/nuccore/JF974297.1
ftp:://ftp.patricbrc.org/genomes/1978231.101/				https://www.ncbi.nlm.nih.gov/nuccore/JF974315.1
ftp:://ftp.patricbrc.org/genomes/1978231.102/				https://www.ncbi.nlm.nih.gov/nuccore/KU686203.1
ftp:://ftp.patricbrc.org/genomes/1978231.103/				https://www.ncbi.nlm.nih.gov/nuccore/NC_015281.1
ftp:://ftp.patricbrc.org/genomes/1978231.104/				https://www.ncbi.nlm.nih.gov/nuccore/NC_015283.1
ftp:://ftp.patricbrc.org/genomes/1978231.105/				https://www.ncbi.nlm.nih.gov/nuccore/NC_015284.1
ftp:://ftp.patricbrc.org/genomes/1978231.106/				https://www.ncbi.nlm.nih.gov/nuccore/NC_015285.1
ftp:://ftp.patricbrc.org/genomes/1978231.107/				https://www.ncbi.nlm.nih.gov/nuccore/NC_015286.1
ftp:://ftp.patricbrc.org/genomes/1978231.108/				https://www.ncbi.nlm.nih.gov/nuccore/NC_015288.1
ftp:://ftp.patricbrc.org/genomes/1978231.109/				https://www.ncbi.nlm.nih.gov/nuccore/NC_015289.1
ftp:://ftp.patricbrc.org/genomes/1978231.11/				https://www.ncbi.nlm.nih.gov/nuccore/NC_015290.1
ftp:://ftp.patricbrc.org/genomes/1978231.111/				https://www.ncbi.nlm.nih.gov/nuccore/NC_016658.1
ftp:://ftp.patricbrc.org/genomes/1978231.112/				https://www.ncbi.nlm.nih.gov/nuccore/NC_016659.1
ftp:://ftp.patricbrc.org/genomes/1978231.113/				https://www.ncbi.nlm.nih.gov/nuccore/NC_016766.1
ftp:://ftp.patricbrc.org/genomes/1978231.114/				https://www.ncbi.nlm.nih.gov/nuccore/NC_018088.1
ftp:://ftp.patricbrc.org/genomes/1978231.115/				https://www.ncbi.nlm.nih.gov/nuccore/NC_020486.1
ftp:://ftp.patricbrc.org/genomes/1978231.116/				https://www.ncbi.nlm.nih.gov/nuccore/NC_020837.1
ftp:://ftp.patricbrc.org/genomes/1978231.117/				https://www.ncbi.nlm.nih.gov/nuccore/NC_020838.1
ftp:://ftp.patricbrc.org/genomes/1978231.118/				https://www.ncbi.nlm.nih.gov/nuccore/NC_020839.1
ftp:://ftp.patricbrc.org/genomes/1978231.119/				https://www.ncbi.nlm.nih.gov/nuccore/NC_020841.1
ftp:://ftp.patricbrc.org/genomes/1978231.12/				https://www.ncbi.nlm.nih.gov/nuccore/NC_020842.1
ftp:://ftp.patricbrc.org/genomes/1978231.121/				https://www.ncbi.nlm.nih.gov/nuccore/NC_020843.1
ftp:://ftp.patricbrc.org/genomes/1978231.122/				https://www.ncbi.nlm.nih.gov/nuccore/NC_020844.1
ftp:://ftp.patricbrc.org/genomes/1978231.123/				https://www.ncbi.nlm.nih.gov/nuccore/NC_020845.1
ftp:://ftp.patricbrc.org/genomes/1978231.124/				https://www.ncbi.nlm.nih.gov/nuccore/NC_020846.1
ftp:://ftp.patricbrc.org/genomes/1978231.125/				https://www.ncbi.nlm.nih.gov/nuccore/NC_020847.1
ftp:://ftp.patricbrc.org/genomes/1978231.126/				https://www.ncbi.nlm.nih.gov/nuccore/NC_020848.1
ftp:://ftp.patricbrc.org/genomes/1978231.127/				https://www.ncbi.nlm.nih.gov/nuccore/NC_020848.1
ftp:://ftp.patricbrc.org/genomes/1978231.128/				https://www.ncbi.nlm.nih.gov/nuccore/NC_020849.1
ftp:://ftp.patricbrc.org/genomes/1978231.129/				https://www.ncbi.nlm.nih.gov/nuccore/NC_020850.1
ftp:://ftp.patricbrc.org/genomes/1978231.13/				https://www.ncbi.nlm.nih.gov/nuccore/NC_020851.1
ftp:://ftp.patricbrc.org/genomes/1978231.131/				https://www.ncbi.nlm.nih.gov/nuccore/NC_020853.1
ftp:://ftp.patricbrc.org/genomes/1978231.132/				https://www.ncbi.nlm.nih.gov/nuccore/NC_020854.1
ftp:://ftp.patricbrc.org/genomes/1978231.133/				https://www.ncbi.nlm.nih.gov/nuccore/NC_020856.2
ftp:://ftp.patricbrc.org/genomes/1978231.134/				https://www.ncbi.nlm.nih.gov/nuccore/NC_020857.1
ftp:://ftp.patricbrc.org/genomes/1978231.135/				https://www.ncbi.nlm.nih.gov/nuccore/NC_020858.2
ftp:://ftp.patricbrc.org/genomes/1978231.136/				https://www.ncbi.nlm.nih.gov/nuccore/NC_020860.1
ftp:://ftp.patricbrc.org/genomes/1978231.137/				https://www.ncbi.nlm.nih.gov/nuccore/NC_020863.1
ftp:://ftp.patricbrc.org/genomes/1978231.138/				https://www.ncbi.nlm.nih.gov/nuccore/NC_020865.1
ftp:://ftp.patricbrc.org/genomes/1978231.139/				https://www.ncbi.nlm.nih.gov/nuccore/NC_020867.1
ftp:://ftp.patricbrc.org/genomes/1978231.14/				https://www.ncbi.nlm.nih.gov/nuccore/NC_020868.1
ftp:://ftp.patricbrc.org/genomes/1978231.141/				https://www.ncbi.nlm.nih.gov/nuccore/NC_020869.1
ftp:://ftp.patricbrc.org/genomes/1978231.142/				https://www.ncbi.nlm.nih.gov/nuccore/NC_020875.1
ftp:://ftp.patricbrc.org/genomes/1978231.143/				https://www.ncbi.nlm.nih.gov/nuccore/NC_021067.1
ftp:://ftp.patricbrc.org/genomes/1978231.144/				https://www.ncbi.nlm.nih.gov/nuccore/NC_021068.1
ftp:://ftp.patricbrc.org/genomes/1978231.145/				https://www.ncbi.nlm.nih.gov/nuccore/NC_021070.1
ftp:://ftp.patricbrc.org/genomes/1978231.146/				https://www.ncbi.nlm.nih.gov/nuccore/NC_021071.1
ftp:://ftp.patricbrc.org/genomes/1978231.147/				https://www.ncbi.nlm.nih.gov/nuccore/NC_021073.1
ftp:://ftp.patricbrc.org/genomes/1978231.148/				https://www.ncbi.nlm.nih.gov/nuccore/NC_021529.2
ftp:://ftp.patricbrc.org/genomes/1978231.149/				https://www.ncbi.nlm.nih.gov/nuccore/NC_021530.1
ftp:://ftp.patricbrc.org/genomes/1978231.15/				https://www.ncbi.nlm.nih.gov/nuccore/NC_021534.1
ftp:://ftp.patricbrc.org/genomes/1978231.151/				https://www.ncbi.nlm.nih.gov/nuccore/NC_021534.1
ftp:://ftp.patricbrc.org/genomes/1978231.152/				https://www.ncbi.nlm.nih.gov/nuccore/NC_021536.1
ftp:://ftp.patricbrc.org/genomes/1978231.153/				https://www.ncbi.nlm.nih.gov/nuccore/NC_021559.1
ftp:://ftp.patricbrc.org/genomes/1978231.154/				https://www.ncbi.nlm.nih.gov/nuccore/NC_021560.1
ftp:://ftp.patricbrc.org/genomes/1978231.155/				https://www.ncbi.nlm.nih.gov/nuccore/NC_025455.1
ftp:://ftp.patricbrc.org/genomes/1978231.156/				https://www.ncbi.nlm.nih.gov/nuccore/NC_025461.1
ftp:://ftp.patricbrc.org/genomes/1978231.157/				https://www.ncbi.nlm.nih.gov/nuccore/NC_025464.1
ftp:://ftp.patricbrc.org/genomes/1978231.158/				https://www.ncbi.nlm.nih.gov/nuccore/NC_029031.1
ftp:://ftp.patricbrc.org/genomes/1978231.159/				https://www.ncbi.nlm.nih.gov/nuccore/NC_029067.1
ftp:://ftp.patricbrc.org/genomes/1978231.16/
ftp:://ftp.patricbrc.org/genomes/1978231.161/
ftp:://ftp.patricbrc.org/genomes/1978231.162/
ftp:://ftp.patricbrc.org/genomes/1978231.163/
ftp:://ftp.patricbrc.org/genomes/1978231.164/
ftp:://ftp.patricbrc.org/genomes/1978231.165/
ftp:://ftp.patricbrc.org/genomes/1978231.166/
ftp:://ftp.patricbrc.org/genomes/1978231.167/
ftp:://ftp.patricbrc.org/genomes/1978231.168/
ftp:://ftp.patricbrc.org/genomes/1978231.169/
ftp:://ftp.patricbrc.org/genomes/1978231.17/
ftp:://ftp.patricbrc.org/genomes/1978231.171/
ftp:://ftp.patricbrc.org/genomes/1978231.172/
ftp:://ftp.patricbrc.org/genomes/1978231.173/
ftp:://ftp.patricbrc.org/genomes/1978231.174/
ftp:://ftp.patricbrc.org/genomes/1978231.175/
ftp:://ftp.patricbrc.org/genomes/1978231.176/
ftp:://ftp.patricbrc.org/genomes/1978231.177/
ftp:://ftp.patricbrc.org/genomes/1978231.178/
ftp:://ftp.patricbrc.org/genomes/1978231.179/
ftp:://ftp.patricbrc.org/genomes/1978231.18/
ftp:://ftp.patricbrc.org/genomes/1978231.181/
ftp:://ftp.patricbrc.org/genomes/1978231.182/
ftp:://ftp.patricbrc.org/genomes/1978231.183/
ftp:://ftp.patricbrc.org/genomes/1978231.184/
ftp:://ftp.patricbrc.org/genomes/1978231.185/
ftp:://ftp.patricbrc.org/genomes/1978231.186/
ftp:://ftp.patricbrc.org/genomes/1978231.187/
ftp:://ftp.patricbrc.org/genomes/1978231.188/
ftp:://ftp.patricbrc.org/genomes/1978231.189/
ftp:://ftp.patricbrc.org/genomes/1978231.19/
ftp:://ftp.patricbrc.org/genomes/1978231.191/
ftp:://ftp.patricbrc.org/genomes/1978231.192/
ftp:://ftp.patricbrc.org/genomes/1978231.193/
ftp:://ftp.patricbrc.org/genomes/1978231.194/
ftp:://ftp.patricbrc.org/genomes/1978231.195/
ftp:://ftp.patricbrc.org/genomes/1978231.196/
ftp:://ftp.patricbrc.org/genomes/1978231.197/
ftp:://ftp.patricbrc.org/genomes/1978231.198/
ftp:://ftp.patricbrc.org/genomes/1978231.199/
ftp:://ftp.patricbrc.org/genomes/1978231.2/
ftp:://ftp.patricbrc.org/genomes/1978231.201/
ftp:://ftp.patricbrc.org/genomes/1978231.202/
ftp:://ftp.patricbrc.org/genomes/1978231.203/
ftp:://ftp.patricbrc.org/genomes/1978231.204/
ftp:://ftp.patricbrc.org/genomes/1978231.205/
ftp:://ftp.patricbrc.org/genomes/1978231.206/
ftp:://ftp.patricbrc.org/genomes/1978231.207/
ftp:://ftp.patricbrc.org/genomes/1978231.208/
ftp:://ftp.patricbrc.org/genomes/1978231.209/
ftp:://ftp.patricbrc.org/genomes/1978231.21/
ftp:://ftp.patricbrc.org/genomes/1978231.211/
ftp:://ftp.patricbrc.org/genomes/1978231.212/
ftp:://ftp.patricbrc.org/genomes/1978231.213/
ftp:://ftp.patricbrc.org/genomes/1978231.214/
ftp:://ftp.patricbrc.org/genomes/1978231.215/
ftp:://ftp.patricbrc.org/genomes/1978231.216/
ftp:://ftp.patricbrc.org/genomes/1978231.217/
ftp:://ftp.patricbrc.org/genomes/1978231.218/
ftp:://ftp.patricbrc.org/genomes/1978231.219/
ftp:://ftp.patricbrc.org/genomes/1978231.22/
ftp:://ftp.patricbrc.org/genomes/1978231.221/
ftp:://ftp.patricbrc.org/genomes/1978231.222/
ftp:://ftp.patricbrc.org/genomes/1978231.223/
ftp:://ftp.patricbrc.org/genomes/1978231.224/
ftp:://ftp.patricbrc.org/genomes/1978231.225/
ftp:://ftp.patricbrc.org/genomes/1978231.226/
ftp:://ftp.patricbrc.org/genomes/1978231.77/
ftp:://ftp.patricbrc.org/genomes/1978231.78/
ftp:://ftp.patricbrc.org/genomes/1978231.79/
ftp:://ftp.patricbrc.org/genomes/1978231.8/
ftp:://ftp.patricbrc.org/genomes/1978231.81/
ftp:://ftp.patricbrc.org/genomes/1978231.82/
ftp:://ftp.patricbrc.org/genomes/1978231.83/
ftp:://ftp.patricbrc.org/genomes/1978231.84/
ftp:://ftp.patricbrc.org/genomes/1978231.85/
ftp:://ftp.patricbrc.org/genomes/1978231.86/
ftp:://ftp.patricbrc.org/genomes/1978231.87/
ftp:://ftp.patricbrc.org/genomes/1978231.88/
ftp:://ftp.patricbrc.org/genomes/1978231.89/
ftp:://ftp.patricbrc.org/genomes/1978231.9/
ftp:://ftp.patricbrc.org/genomes/1978231.91/
ftp:://ftp.patricbrc.org/genomes/1978231.92/
ftp:://ftp.patricbrc.org/genomes/1978231.93/
ftp:://ftp.patricbrc.org/genomes/1978231.94/
ftp:://ftp.patricbrc.org/genomes/1978231.95/
ftp:://ftp.patricbrc.org/genomes/1978231.96/
ftp:://ftp.patricbrc.org/genomes/1978231.97/
ftp:://ftp.patricbrc.org/genomes/1978231.98/
ftp:://ftp.patricbrc.org/genomes/1978231.99/
ftp:://ftp.patricbrc.org/genomes/1979185.3/
ftp:://ftp.patricbrc.org/genomes/1981054.3/
ftp:://ftp.patricbrc.org/genomes/1982589.4/
ftp:://ftp.patricbrc.org/genomes/1986229.3/
ftp:://ftp.patricbrc.org/genomes/1986230.3/
ftp:://ftp.patricbrc.org/genomes/1986231.3/
ftp:://ftp.patricbrc.org/genomes/1986232.3/
ftp:://ftp.patricbrc.org/genomes/1986233.3/
ftp:://ftp.patricbrc.org/genomes/1986234.3/
ftp:://ftp.patricbrc.org/genomes/1986235.3/
ftp:://ftp.patricbrc.org/genomes/1986237.3/
ftp:://ftp.patricbrc.org/genomes/1986238.3/
ftp:://ftp.patricbrc.org/genomes/1986239.3/
ftp:://ftp.patricbrc.org/genomes/1986240.3/
ftp:://ftp.patricbrc.org/genomes/1986241.3/
ftp:://ftp.patricbrc.org/genomes/1986242.3/
ftp:://ftp.patricbrc.org/genomes/1986244.3/
ftp:://ftp.patricbrc.org/genomes/1986245.3/
ftp:://ftp.patricbrc.org/genomes/1986246.3/
ftp:://ftp.patricbrc.org/genomes/1986247.3/
ftp:://ftp.patricbrc.org/genomes/1986248.3/
ftp:://ftp.patricbrc.org/genomes/1986249.3/
ftp:://ftp.patricbrc.org/genomes/1986250.3/
ftp:://ftp.patricbrc.org/genomes/1986251.3/
ftp:://ftp.patricbrc.org/genomes/1986252.3/
ftp:://ftp.patricbrc.org/genomes/1986253.3/
ftp:://ftp.patricbrc.org/genomes/1986254.3/
ftp:://ftp.patricbrc.org/genomes/1986255.3/
ftp:://ftp.patricbrc.org/genomes/1986256.3/
ftp:://ftp.patricbrc.org/genomes/1986257.3/
ftp:://ftp.patricbrc.org/genomes/1986258.3/
ftp:://ftp.patricbrc.org/genomes/1986259.3/
ftp:://ftp.patricbrc.org/genomes/1986260.3/
ftp:://ftp.patricbrc.org/genomes/1986262.3/
ftp:://ftp.patricbrc.org/genomes/1986263.3/
ftp:://ftp.patricbrc.org/genomes/1986264.3/
ftp:://ftp.patricbrc.org/genomes/1986265.3/
ftp:://ftp.patricbrc.org/genomes/1986266.3/
ftp:://ftp.patricbrc.org/genomes/1986267.3/
ftp:://ftp.patricbrc.org/genomes/2006849.3/
ftp:://ftp.patricbrc.org/genomes/2007300.3/
ftp:://ftp.patricbrc.org/genomes/2007301.3/
ftp:://ftp.patricbrc.org/genomes/2007308.3/
ftp:://ftp.patricbrc.org/genomes/2014617.3/
ftp:://ftp.patricbrc.org/genomes/2021391.101/
ftp:://ftp.patricbrc.org/genomes/2021391.102/
ftp:://ftp.patricbrc.org/genomes/2024888.22/
ftp:://ftp.patricbrc.org/genomes/2024888.23/
ftp:://ftp.patricbrc.org/genomes/2026721.4/
ftp:://ftp.patricbrc.org/genomes/2026742.1/
ftp:://ftp.patricbrc.org/genomes/2026742.101/
ftp:://ftp.patricbrc.org/genomes/2026742.102/
ftp:://ftp.patricbrc.org/genomes/2026742.103/
ftp:://ftp.patricbrc.org/genomes/2026742.104/
ftp:://ftp.patricbrc.org/genomes/2026742.55/
ftp:://ftp.patricbrc.org/genomes/2026742.56/
ftp:://ftp.patricbrc.org/genomes/2026742.57/
ftp:://ftp.patricbrc.org/genomes/2026742.58/
ftp:://ftp.patricbrc.org/genomes/2026742.59/
ftp:://ftp.patricbrc.org/genomes/2026742.6/
ftp:://ftp.patricbrc.org/genomes/2026742.61/
ftp:://ftp.patricbrc.org/genomes/2026742.62/
ftp:://ftp.patricbrc.org/genomes/2026742.63/
ftp:://ftp.patricbrc.org/genomes/2026742.64/
ftp:://ftp.patricbrc.org/genomes/2026742.65/
ftp:://ftp.patricbrc.org/genomes/2026742.66/
ftp:://ftp.patricbrc.org/genomes/2026742.67/
ftp:://ftp.patricbrc.org/genomes/2026742.68/
ftp:://ftp.patricbrc.org/genomes/2026742.69/
ftp:://ftp.patricbrc.org/genomes/2026742.7/
ftp:://ftp.patricbrc.org/genomes/2026742.71/
ftp:://ftp.patricbrc.org/genomes/2026742.72/
ftp:://ftp.patricbrc.org/genomes/2026742.73/
ftp:://ftp.patricbrc.org/genomes/2026742.74/
ftp:://ftp.patricbrc.org/genomes/2026742.75/
ftp:://ftp.patricbrc.org/genomes/2026742.76/
ftp:://ftp.patricbrc.org/genomes/2026742.77/
ftp:://ftp.patricbrc.org/genomes/2026742.78/
ftp:://ftp.patricbrc.org/genomes/2026742.79/
ftp:://ftp.patricbrc.org/genomes/2026742.8/
ftp:://ftp.patricbrc.org/genomes/2026742.81/
ftp:://ftp.patricbrc.org/genomes/2026742.82/
ftp:://ftp.patricbrc.org/genomes/2026742.83/
ftp:://ftp.patricbrc.org/genomes/2026742.84/
ftp:://ftp.patricbrc.org/genomes/2026742.85/
ftp:://ftp.patricbrc.org/genomes/2026742.86/
ftp:://ftp.patricbrc.org/genomes/2026742.87/
ftp:://ftp.patricbrc.org/genomes/2026742.88/
ftp:://ftp.patricbrc.org/genomes/2026742.89/
ftp:://ftp.patricbrc.org/genomes/2026742.9/
ftp:://ftp.patricbrc.org/genomes/2026742.91/
ftp:://ftp.patricbrc.org/genomes/2026742.92/
ftp:://ftp.patricbrc.org/genomes/2026742.93/
ftp:://ftp.patricbrc.org/genomes/2026742.94/
ftp:://ftp.patricbrc.org/genomes/2026742.95/
ftp:://ftp.patricbrc.org/genomes/2026742.96/
ftp:://ftp.patricbrc.org/genomes/2026742.97/
ftp:://ftp.patricbrc.org/genomes/2026742.98/
ftp:://ftp.patricbrc.org/genomes/2026742.99/
ftp:://ftp.patricbrc.org/genomes/2026743.18/
ftp:://ftp.patricbrc.org/genomes/2026743.19/
ftp:://ftp.patricbrc.org/genomes/2026784.11/
ftp:://ftp.patricbrc.org/genomes/2026784.12/
ftp:://ftp.patricbrc.org/genomes/2026799.1/
ftp:://ftp.patricbrc.org/genomes/2026799.101/
ftp:://ftp.patricbrc.org/genomes/2026799.102/
ftp:://ftp.patricbrc.org/genomes/2026799.103/
ftp:://ftp.patricbrc.org/genomes/2026799.104/
ftp:://ftp.patricbrc.org/genomes/2026799.105/
ftp:://ftp.patricbrc.org/genomes/2026799.106/
ftp:://ftp.patricbrc.org/genomes/2026799.107/
ftp:://ftp.patricbrc.org/genomes/2026799.108/
ftp:://ftp.patricbrc.org/genomes/2026799.109/
ftp:://ftp.patricbrc.org/genomes/2026799.11/
ftp:://ftp.patricbrc.org/genomes/2026799.111/
ftp:://ftp.patricbrc.org/genomes/2026799.112/
ftp:://ftp.patricbrc.org/genomes/2026799.113/
ftp:://ftp.patricbrc.org/genomes/2026799.114/
ftp:://ftp.patricbrc.org/genomes/2026799.115/
ftp:://ftp.patricbrc.org/genomes/2026799.116/
ftp:://ftp.patricbrc.org/genomes/2026799.117/
ftp:://ftp.patricbrc.org/genomes/2026799.118/
ftp:://ftp.patricbrc.org/genomes/2026799.119/
ftp:://ftp.patricbrc.org/genomes/2026799.12/
ftp:://ftp.patricbrc.org/genomes/2026799.121/
ftp:://ftp.patricbrc.org/genomes/2026799.122/
ftp:://ftp.patricbrc.org/genomes/2026799.123/
ftp:://ftp.patricbrc.org/genomes/2026799.124/
ftp:://ftp.patricbrc.org/genomes/2026799.125/
ftp:://ftp.patricbrc.org/genomes/2026799.126/
ftp:://ftp.patricbrc.org/genomes/2026799.127/
ftp:://ftp.patricbrc.org/genomes/2026799.128/
ftp:://ftp.patricbrc.org/genomes/2026799.129/
ftp:://ftp.patricbrc.org/genomes/2026799.13/
ftp:://ftp.patricbrc.org/genomes/2026799.131/
ftp:://ftp.patricbrc.org/genomes/2026799.132/
ftp:://ftp.patricbrc.org/genomes/2026799.133/
ftp:://ftp.patricbrc.org/genomes/2026799.134/
ftp:://ftp.patricbrc.org/genomes/2026799.135/
ftp:://ftp.patricbrc.org/genomes/2026799.136/
ftp:://ftp.patricbrc.org/genomes/2026799.137/
ftp:://ftp.patricbrc.org/genomes/2026799.138/
ftp:://ftp.patricbrc.org/genomes/2026799.139/
ftp:://ftp.patricbrc.org/genomes/2026799.14/
ftp:://ftp.patricbrc.org/genomes/2026799.141/
ftp:://ftp.patricbrc.org/genomes/2026799.142/
ftp:://ftp.patricbrc.org/genomes/2026799.143/
ftp:://ftp.patricbrc.org/genomes/2026799.144/
ftp:://ftp.patricbrc.org/genomes/2026799.145/
ftp:://ftp.patricbrc.org/genomes/2026799.146/
ftp:://ftp.patricbrc.org/genomes/2026799.147/
ftp:://ftp.patricbrc.org/genomes/2026799.148/
ftp:://ftp.patricbrc.org/genomes/2026799.149/
ftp:://ftp.patricbrc.org/genomes/2026799.15/
ftp:://ftp.patricbrc.org/genomes/2026799.151/
ftp:://ftp.patricbrc.org/genomes/2026799.152/
ftp:://ftp.patricbrc.org/genomes/2026799.153/
ftp:://ftp.patricbrc.org/genomes/2026799.154/
ftp:://ftp.patricbrc.org/genomes/2026799.158/
ftp:://ftp.patricbrc.org/genomes/2026799.159/
ftp:://ftp.patricbrc.org/genomes/2026799.2/
ftp:://ftp.patricbrc.org/genomes/2026799.21/
ftp:://ftp.patricbrc.org/genomes/2026799.22/
ftp:://ftp.patricbrc.org/genomes/2026799.23/
ftp:://ftp.patricbrc.org/genomes/2026799.24/
ftp:://ftp.patricbrc.org/genomes/2026799.25/
ftp:://ftp.patricbrc.org/genomes/2026799.26/
ftp:://ftp.patricbrc.org/genomes/2026799.27/
ftp:://ftp.patricbrc.org/genomes/2026799.28/
ftp:://ftp.patricbrc.org/genomes/2026799.29/
ftp:://ftp.patricbrc.org/genomes/2026799.3/
ftp:://ftp.patricbrc.org/genomes/2026799.31/
ftp:://ftp.patricbrc.org/genomes/2026799.32/
ftp:://ftp.patricbrc.org/genomes/2026799.33/
ftp:://ftp.patricbrc.org/genomes/2026799.34/
ftp:://ftp.patricbrc.org/genomes/2026799.35/
ftp:://ftp.patricbrc.org/genomes/2026799.36/
ftp:://ftp.patricbrc.org/genomes/2026799.37/
ftp:://ftp.patricbrc.org/genomes/2026799.38/
ftp:://ftp.patricbrc.org/genomes/2026799.39/
ftp:://ftp.patricbrc.org/genomes/2026799.4/
ftp:://ftp.patricbrc.org/genomes/2026799.41/
ftp:://ftp.patricbrc.org/genomes/2026799.42/
ftp:://ftp.patricbrc.org/genomes/2026799.43/
ftp:://ftp.patricbrc.org/genomes/2026799.44/
ftp:://ftp.patricbrc.org/genomes/2026799.45/
ftp:://ftp.patricbrc.org/genomes/2026799.46/
ftp:://ftp.patricbrc.org/genomes/2026799.47/
ftp:://ftp.patricbrc.org/genomes/2026799.48/
ftp:://ftp.patricbrc.org/genomes/2026799.49/
ftp:://ftp.patricbrc.org/genomes/2026799.5/
ftp:://ftp.patricbrc.org/genomes/2026799.51/
ftp:://ftp.patricbrc.org/genomes/2026799.52/
ftp:://ftp.patricbrc.org/genomes/2026799.53/
ftp:://ftp.patricbrc.org/genomes/2026799.54/
ftp:://ftp.patricbrc.org/genomes/2026799.55/
ftp:://ftp.patricbrc.org/genomes/2026799.56/
ftp:://ftp.patricbrc.org/genomes/2026799.57/
ftp:://ftp.patricbrc.org/genomes/2026799.58/
ftp:://ftp.patricbrc.org/genomes/2026799.59/
ftp:://ftp.patricbrc.org/genomes/2026799.6/
ftp:://ftp.patricbrc.org/genomes/2026799.61/
ftp:://ftp.patricbrc.org/genomes/2026799.62/
ftp:://ftp.patricbrc.org/genomes/2026799.63/
ftp:://ftp.patricbrc.org/genomes/2026799.64/
ftp:://ftp.patricbrc.org/genomes/2026799.65/
ftp:://ftp.patricbrc.org/genomes/2026799.66/
ftp:://ftp.patricbrc.org/genomes/2026799.67/
ftp:://ftp.patricbrc.org/genomes/2026799.68/
ftp:://ftp.patricbrc.org/genomes/2026799.69/
ftp:://ftp.patricbrc.org/genomes/2026799.7/
ftp:://ftp.patricbrc.org/genomes/2026799.71/
ftp:://ftp.patricbrc.org/genomes/2026799.72/
ftp:://ftp.patricbrc.org/genomes/2026799.73/
ftp:://ftp.patricbrc.org/genomes/2026799.74/
ftp:://ftp.patricbrc.org/genomes/2026799.75/
ftp:://ftp.patricbrc.org/genomes/2026799.76/
ftp:://ftp.patricbrc.org/genomes/2026799.77/
ftp:://ftp.patricbrc.org/genomes/2026799.78/
ftp:://ftp.patricbrc.org/genomes/2026799.79/
ftp:://ftp.patricbrc.org/genomes/2026799.8/
ftp:://ftp.patricbrc.org/genomes/2026799.81/
ftp:://ftp.patricbrc.org/genomes/2026799.82/
ftp:://ftp.patricbrc.org/genomes/2026799.83/
ftp:://ftp.patricbrc.org/genomes/2026799.84/
ftp:://ftp.patricbrc.org/genomes/2026799.85/
ftp:://ftp.patricbrc.org/genomes/2026799.86/
ftp:://ftp.patricbrc.org/genomes/2026799.87/
ftp:://ftp.patricbrc.org/genomes/2026799.88/
ftp:://ftp.patricbrc.org/genomes/2026799.89/
ftp:://ftp.patricbrc.org/genomes/2026799.9/
ftp:://ftp.patricbrc.org/genomes/2026799.92/
ftp:://ftp.patricbrc.org/genomes/2026799.94/
ftp:://ftp.patricbrc.org/genomes/2026799.95/
ftp:://ftp.patricbrc.org/genomes/2026799.96/
ftp:://ftp.patricbrc.org/genomes/2026799.97/
ftp:://ftp.patricbrc.org/genomes/2026799.98/
ftp:://ftp.patricbrc.org/genomes/2026799.99/
ftp:://ftp.patricbrc.org/genomes/2030880.1/
ftp:://ftp.patricbrc.org/genomes/2030880.11/
ftp:://ftp.patricbrc.org/genomes/2030880.12/
ftp:://ftp.patricbrc.org/genomes/2030880.13/
ftp:://ftp.patricbrc.org/genomes/2030880.8/
ftp:://ftp.patricbrc.org/genomes/2030880.9/
ftp:://ftp.patricbrc.org/genomes/2032687.3/
ftp:://ftp.patricbrc.org/genomes/203795.3/
ftp:://ftp.patricbrc.org/genomes/2053607.1/
ftp:://ftp.patricbrc.org/genomes/2053607.11/
ftp:://ftp.patricbrc.org/genomes/2053607.12/
ftp:://ftp.patricbrc.org/genomes/2053607.13/
ftp:://ftp.patricbrc.org/genomes/2053607.14/
ftp:://ftp.patricbrc.org/genomes/2053607.15/
ftp:://ftp.patricbrc.org/genomes/2053607.16/
ftp:://ftp.patricbrc.org/genomes/2053607.17/
ftp:://ftp.patricbrc.org/genomes/2053607.18/
ftp:://ftp.patricbrc.org/genomes/2053607.19/
ftp:://ftp.patricbrc.org/genomes/2053607.2/
ftp:://ftp.patricbrc.org/genomes/2053607.21/
ftp:://ftp.patricbrc.org/genomes/2053607.22/
ftp:://ftp.patricbrc.org/genomes/2053607.23/
ftp:://ftp.patricbrc.org/genomes/2053607.24/
ftp:://ftp.patricbrc.org/genomes/2053607.25/
ftp:://ftp.patricbrc.org/genomes/2053607.26/
ftp:://ftp.patricbrc.org/genomes/2053607.27/
ftp:://ftp.patricbrc.org/genomes/2053607.28/
ftp:://ftp.patricbrc.org/genomes/2053607.29/
ftp:://ftp.patricbrc.org/genomes/2053607.3/
ftp:://ftp.patricbrc.org/genomes/2053607.31/
ftp:://ftp.patricbrc.org/genomes/2053607.32/
ftp:://ftp.patricbrc.org/genomes/2053607.33/
ftp:://ftp.patricbrc.org/genomes/2053607.34/
ftp:://ftp.patricbrc.org/genomes/2053607.35/
ftp:://ftp.patricbrc.org/genomes/2053607.36/
ftp:://ftp.patricbrc.org/genomes/2053607.37/
ftp:://ftp.patricbrc.org/genomes/2053607.38/
ftp:://ftp.patricbrc.org/genomes/2053607.39/
ftp:://ftp.patricbrc.org/genomes/2053607.4/
ftp:://ftp.patricbrc.org/genomes/2053607.41/
ftp:://ftp.patricbrc.org/genomes/2053607.42/
ftp:://ftp.patricbrc.org/genomes/2053607.43/
ftp:://ftp.patricbrc.org/genomes/2053607.44/
ftp:://ftp.patricbrc.org/genomes/2053607.45/
ftp:://ftp.patricbrc.org/genomes/2053607.46/
ftp:://ftp.patricbrc.org/genomes/2053607.5/
ftp:://ftp.patricbrc.org/genomes/2053607.6/
ftp:://ftp.patricbrc.org/genomes/2053607.7/
ftp:://ftp.patricbrc.org/genomes/2053607.8/
ftp:://ftp.patricbrc.org/genomes/2053607.9/
ftp:://ftp.patricbrc.org/genomes/2071625.3/
ftp:://ftp.patricbrc.org/genomes/2082395.3/
ftp:://ftp.patricbrc.org/genomes/2100725.3/
ftp:://ftp.patricbrc.org/genomes/2133949.3/
ftp:://ftp.patricbrc.org/genomes/2133950.3/
ftp:://ftp.patricbrc.org/genomes/2133951.3/
ftp:://ftp.patricbrc.org/genomes/2133952.3/
ftp:://ftp.patricbrc.org/genomes/2133953.3/
ftp:://ftp.patricbrc.org/genomes/2164156.3/
ftp:://ftp.patricbrc.org/genomes/2169412.3/
ftp:://ftp.patricbrc.org/genomes/2169413.3/
ftp:://ftp.patricbrc.org/genomes/2175152.3/
ftp:://ftp.patricbrc.org/genomes/2175152.4/
ftp:://ftp.patricbrc.org/genomes/2175152.5/
ftp:://ftp.patricbrc.org/genomes/2249428.3/
ftp:://ftp.patricbrc.org/genomes/2249757.3/
ftp:://ftp.patricbrc.org/genomes/2267226.3/
ftp:://ftp.patricbrc.org/genomes/2267227.3/
ftp:://ftp.patricbrc.org/genomes/2267228.3/
ftp:://ftp.patricbrc.org/genomes/2267229.3/
ftp:://ftp.patricbrc.org/genomes/2267230.3/
ftp:://ftp.patricbrc.org/genomes/2267231.3/
ftp:://ftp.patricbrc.org/genomes/2267254.3/
ftp:://ftp.patricbrc.org/genomes/2267255.3/
ftp:://ftp.patricbrc.org/genomes/2267256.3/
ftp:://ftp.patricbrc.org/genomes/2267257.3/
ftp:://ftp.patricbrc.org/genomes/2267258.3/
ftp:://ftp.patricbrc.org/genomes/2267259.3/
ftp:://ftp.patricbrc.org/genomes/2267260.3/
ftp:://ftp.patricbrc.org/genomes/28108.21/
ftp:://ftp.patricbrc.org/genomes/28108.22/
ftp:://ftp.patricbrc.org/genomes/306.135/
ftp:://ftp.patricbrc.org/genomes/379097.8/
ftp:://ftp.patricbrc.org/genomes/379097.9/
ftp:://ftp.patricbrc.org/genomes/51671.18/
ftp:://ftp.patricbrc.org/genomes/562.22309/
ftp:://ftp.patricbrc.org/genomes/60890.52/
ftp:://ftp.patricbrc.org/genomes/63186.21/
ftp:://ftp.patricbrc.org/genomes/649841.3/
ftp:://ftp.patricbrc.org/genomes/671143.13/
ftp:://ftp.patricbrc.org/genomes/672.584/
ftp:://ftp.patricbrc.org/genomes/672.585/
ftp:://ftp.patricbrc.org/genomes/672.586/
ftp:://ftp.patricbrc.org/genomes/672.587/
ftp:://ftp.patricbrc.org/genomes/689.1/
ftp:://ftp.patricbrc.org/genomes/689.6/
ftp:://ftp.patricbrc.org/genomes/70125.7/
ftp:://ftp.patricbrc.org/genomes/87.17/
ftp:://ftp.patricbrc.org/genomes/1017273.7/
ftp:://ftp.patricbrc.org/genomes/1017273.8/
ftp:://ftp.patricbrc.org/genomes/1042.63/
ftp:://ftp.patricbrc.org/genomes/1046115.4/
ftp:://ftp.patricbrc.org/genomes/1049583.6/
ftp:://ftp.patricbrc.org/genomes/1049583.7/
ftp:://ftp.patricbrc.org/genomes/115553.4/
ftp:://ftp.patricbrc.org/genomes/1176257.4/
ftp:://ftp.patricbrc.org/genomes/1190813.4/
ftp:://ftp.patricbrc.org/genomes/120577.6/
ftp:://ftp.patricbrc.org/genomes/1229153.3/
ftp:://ftp.patricbrc.org/genomes/1284675.3/
ftp:://ftp.patricbrc.org/genomes/1348245.3/
ftp:://ftp.patricbrc.org/genomes/1352.2578/
ftp:://ftp.patricbrc.org/genomes/1402861.6/
ftp:://ftp.patricbrc.org/genomes/1402861.7/
ftp:://ftp.patricbrc.org/genomes/1406873.5/
ftp:://ftp.patricbrc.org/genomes/1408.208/
ftp:://ftp.patricbrc.org/genomes/1414647.3/
ftp:://ftp.patricbrc.org/genomes/1414647.6/
ftp:://ftp.patricbrc.org/genomes/1414647.9/
ftp:://ftp.patricbrc.org/genomes/142461.5/
ftp:://ftp.patricbrc.org/genomes/1435349.4/
ftp:://ftp.patricbrc.org/genomes/1443666.3/
ftp:://ftp.patricbrc.org/genomes/1486246.15/
ftp:://ftp.patricbrc.org/genomes/1486246.16/
ftp:://ftp.patricbrc.org/genomes/1489064.4/
ftp:://ftp.patricbrc.org/genomes/1549850.3/
ftp:://ftp.patricbrc.org/genomes/1579316.3/
ftp:://ftp.patricbrc.org/genomes/1603038.3/
ftp:://ftp.patricbrc.org/genomes/1611323.3/
ftp:://ftp.patricbrc.org/genomes/1648923.9/
ftp:://ftp.patricbrc.org/genomes/1681184.3/
ftp:://ftp.patricbrc.org/genomes/1690221.4/
ftp:://ftp.patricbrc.org/genomes/1690269.4/
ftp:://ftp.patricbrc.org/genomes/1702169.3/
ftp:://ftp.patricbrc.org/genomes/1704590.3/
ftp:://ftp.patricbrc.org/genomes/1721120.3/
ftp:://ftp.patricbrc.org/genomes/172371.9/
ftp:://ftp.patricbrc.org/genomes/1792834.4/
ftp:://ftp.patricbrc.org/genomes/1797110.3/
ftp:://ftp.patricbrc.org/genomes/1813816.3/
ftp:://ftp.patricbrc.org/genomes/1813817.3/
ftp:://ftp.patricbrc.org/genomes/1822217.3/
ftp:://ftp.patricbrc.org/genomes/1822218.3/
ftp:://ftp.patricbrc.org/genomes/1822219.3/
ftp:://ftp.patricbrc.org/genomes/1822220.3/
ftp:://ftp.patricbrc.org/genomes/1822221.3/
ftp:://ftp.patricbrc.org/genomes/1822222.3/
ftp:://ftp.patricbrc.org/genomes/1822223.3/
ftp:://ftp.patricbrc.org/genomes/1822224.3/
ftp:://ftp.patricbrc.org/genomes/1822225.3/
ftp:://ftp.patricbrc.org/genomes/1822226.3/
ftp:://ftp.patricbrc.org/genomes/1822227.3/
ftp:://ftp.patricbrc.org/genomes/1822228.3/
ftp:://ftp.patricbrc.org/genomes/1822229.3/
ftp:://ftp.patricbrc.org/genomes/1822230.3/
ftp:://ftp.patricbrc.org/genomes/1822231.3/
ftp:://ftp.patricbrc.org/genomes/1822232.3/
ftp:://ftp.patricbrc.org/genomes/1822233.3/
ftp:://ftp.patricbrc.org/genomes/1822234.3/
ftp:://ftp.patricbrc.org/genomes/1822235.3/
ftp:://ftp.patricbrc.org/genomes/1822236.3/
ftp:://ftp.patricbrc.org/genomes/1822238.3/
ftp:://ftp.patricbrc.org/genomes/1822239.3/
ftp:://ftp.patricbrc.org/genomes/1822240.3/
ftp:://ftp.patricbrc.org/genomes/1822241.3/
ftp:://ftp.patricbrc.org/genomes/1822242.3/
ftp:://ftp.patricbrc.org/genomes/1822243.3/
ftp:://ftp.patricbrc.org/genomes/1822244.3/
ftp:://ftp.patricbrc.org/genomes/1822245.3/
ftp:://ftp.patricbrc.org/genomes/1822246.3/
ftp:://ftp.patricbrc.org/genomes/1822247.3/
ftp:://ftp.patricbrc.org/genomes/1822248.3/
ftp:://ftp.patricbrc.org/genomes/1822249.3/
ftp:://ftp.patricbrc.org/genomes/1822250.3/
ftp:://ftp.patricbrc.org/genomes/1822251.3/
ftp:://ftp.patricbrc.org/genomes/1822252.3/
ftp:://ftp.patricbrc.org/genomes/1822253.3/
ftp:://ftp.patricbrc.org/genomes/1822254.3/
ftp:://ftp.patricbrc.org/genomes/1822255.3/
ftp:://ftp.patricbrc.org/genomes/1822256.3/
ftp:://ftp.patricbrc.org/genomes/1822257.3/
ftp:://ftp.patricbrc.org/genomes/1822258.3/
[truncated: 609 more rows]

## Sheet: evaluation set - eukaryotic seq
Fungi genomes						Plant genomes				Protozoan genomes
[truncated: 277 more rows]
